# Supplementary material for: Carbonyl mediated fluorescence in aceno[ n ]helicenones and fluoreno[ n ]helicenes
Source: Royal Society of Chemistry journal article supplement (doi:10.1039/d4sc00892h), 2024-01-01
Supplement: d4sc00892h1.pdf [file d4sc00892h1.pdf]

# Carbonyl Mediated Fluorescence in Aceno[n]helicenones and Fluoreno[n]helicenes

## Supplementary Information

Michal Šámal,<sup>1\*</sup> Ludmilla Sturm,<sup>2</sup> Marzena Banasiewicz,<sup>3</sup> Irena Deperasinska,<sup>3</sup> Boleslaw Kozankiewicz,<sup>3</sup> Olaf Morawski,<sup>3</sup> Yuuya Nagata<sup>4</sup>, Pierre Dechambenoit,<sup>2</sup> Harald Bock,<sup>2</sup> Amandine Rossel,<sup>2</sup> Miloš Buděšínský,<sup>1</sup> Anthony Boudier<sup>5</sup> and Andrej Jančařík<sup>2\*</sup>

<sup>1</sup> Institute of Organic Chemistry and Biochemistry of the Czech Academy of Sciences, 166 10 Prague 6, Czech Republic

<sup>2</sup> Université de Bordeaux, CNRS, Centre de Recherche Paul Pascal, CRPP, UMR 5031, 33600 Pessac, France

<sup>3</sup> Institute of Physics, Polish Academy of Sciences, Al. Lotników 32/46, 02-668 Warsaw, Poland

<sup>4</sup> Japan Institute for Chemical Reaction Design and Discovery (WPI-ICReDD), Hokkaido University, Sapporo, Hokkaido 001-0021, Japan

<sup>5</sup> Institut Européen de Chimie et Biologie (IECB), Université de Bordeaux-CNRS, UMR 5248, 2 rue Robert Escarpit, F-33607 Pessac Cedex, France

\*correspondence to: [samal@uochb.cas.cz](mailto:samal@uochb.cas.cz), [andrej.jancarik@crpp.cnrs.fr](mailto:andrej.jancarik@crpp.cnrs.fr)

## Table of Contents

|                                                                                         |      |
|-----------------------------------------------------------------------------------------|------|
| List of abbreviations.....                                                              | S3   |
| Experimental Section: General Information .....                                         | S4   |
| Synthesis of Aceno- and Fluoreno[n]Helicenones <b>rac-1A(F)–8A(F)</b> .....             | S10  |
| Aceno[6]Helicenone <b>rac-1A</b> and Fluoreno[6]Helicenone <b>rac-1F</b> .....          | S11  |
| Aceno[6]Helicenone <b>rac-2A</b> and Fluoreno[6]Helicenone <b>rac-2F</b> .....          | S23  |
| Aceno[6]Helicenone <b>rac-3A</b> and Fluoreno[6]Helicenone <b>rac-3F</b> .....          | S30  |
| Aceno[7]Helicenone <b>rac-4A</b> and Fluoreno[7]Helicenone <b>rac-4F</b> .....          | S38  |
| Aceno[7]Helicenone <b>rac-5A</b> and Fluoreno[7]Helicenone <b>rac-5F</b> .....          | S44  |
| Aceno[7]Helicenone <b>rac-6A</b> and Fluoreno[7]Helicenone <b>rac-6F</b> .....          | S49  |
| Aceno[8]Helicenone <b>rac-7A</b> and Fluoreno[8]Helicenone <b>rac-7F</b> .....          | S53  |
| Aceno[9]Helicenone <b>rac-8A</b> and Fluoreno[9]Helicenone <b>rac-8F</b> .....          | S58  |
| HPLC Resolution of Helicenones <b>rac-1A-8A</b> and <b>6F</b> into Enantiomers .....    | S64  |
| <sup>1</sup> H and <sup>13</sup> C NMR spectra of <b>1 - 54</b> .....                   | S82  |
| Photophysical and chiroptical properties of <b>1A(F)–8A(F)</b> .....                    | S131 |
| Experimental and calculated ECD Spectra of Helicenones <b>1A-8A</b> and <b>6F</b> ..... | S159 |
| Crystallographic data of <b>5F</b> , <b>6F</b> and <b>8F</b> .....                      | S165 |
| XYZ coordinates and energies of ground and excited states of <b>1A(F)–8A(F)</b> .....   | S170 |
| Computational Investigation of the Electrophilic Cyclization .....                      | S189 |

## List of Abbreviations:

|                                |                                                |
|--------------------------------|------------------------------------------------|
| $S_n$ ( $n = 0, 1, 2, \dots$ ) | Singlet States                                 |
| $T_n$ ( $n = 0, 1, 2, \dots$ ) | Triplet States                                 |
| ISC                            | InterSystem Crossing                           |
| fc                             | vertical transition by Franck-Condon principle |
| Fc                             | Ferrocene                                      |
| Fc <sup>+</sup>                | Ferrocenium                                    |
| $k_r$                          | radiative rate constant                        |
| $k_{nr}$                       | nonradiative decay rate constant               |
| $\Phi_{PL}$                    | photoluminescent quantum yield                 |
| $t_{fl}$                       | fluorescence lifetime                          |
| f                              | oscillator strength                            |
| SOC                            | spin orbit coupling                            |
| $g_{abs}$                      | absorption dissymmetry factor                  |
| $g_{lum}$                      | emission dissymmetry factor                    |
| DCM                            | dichloromethane                                |
| CHX                            | cyclohexane                                    |
| ACN                            | acetonitrile                                   |
| HOMO                           | highest occupied molecular orbital             |
| LUMO                           | lowest unoccupied molecular orbital            |
| TDDFT                          | Time-dependent density-functional theory       |
| CV                             | cyclic voltammetry                             |

## Experimental Section

**General:** Melting point were determined on Mikro-Heiztisch Polytherm A (Hund, Wetzlar) apparatus and are uncorrected. The NMR spectra were measured on JEOL-400 instrument or Bruker Advance III HD, 400 and 600 instruments, respectively. The  $^1\text{H}$  NMR spectra were measured at 400.13 MHz and 600.13 MHz, the  $^{13}\text{C}$  NMR spectra at 100.61 MHz and 150.90 MHz in  $\text{CDCl}_3$ ,  $\text{CD}_2\text{Cl}_2$  or tetrachloroethane- $d_2$  as indicated in 5 mm PFG probe with indirect detection. For standardisation of  $^1\text{H}$  NMR spectra the residual signals of solvent ( $\delta$  7.26 for  $\text{CHCl}_3$ ,  $\delta$  5.32 for  $\text{CH}_2\text{Cl}_2$ ,  $\delta$  6.00 for tetrachloroethane) was used. In the case of  $^{13}\text{C}$  spectra the signal of solvent ( $\delta$  77.16 for  $\text{CDCl}_3$ ,  $\delta$  54.00 for  $\text{CD}_2\text{Cl}_2$ ,  $\delta$  73.78 for tetrachloroethane- $d_2$ ) was used. The chemical shifts are given in  $\delta$ -scale, the coupling constants  $J$  are given in Hz. For the correct assignment of both the  $^1\text{H}$  and  $^{13}\text{C}$  NMR spectra of key compounds, homonuclear 2D-H,H-COSY, 2D-H,H-ROESY, and heteronuclear 2D-H,C-HSQC, and 2D-H,C-HMBC experiments were performed. The IR spectra were measured in  $\text{CHCl}_3$  or KBr. The EI mass spectra were determined at an ionising voltage of 70 eV, the  $m/z$  values are given along with their relative intensities (%). The standard 70 eV spectra were recorded in the positive ion mode. The sample was dissolved in chloroform, loaded into a quartz cup of the direct probe and inserted into the ion source. The source temperature was 220 °C. For exact mass measurement, the spectrum was internally calibrated using perfluorotri-*n*-butylamine (Heptacosyl). The ESI mass spectra were recorded using a quadrupole orthogonal acceleration time-of-flight tandem mass spectrometer (Q-ToF micro, Waters) and high resolution ESI mass spectra using a hybrid FT mass spectrometer combining a linear ion trap MS and the Orbitrap mass analyzer (LTQ Orbitrap XL, Thermo Fisher Scientific). The conditions were optimised for suitable ionisation in the ESI Orbitrap source (sheath gas flow rate 35 a.u., aux gas flow rate 10 a.u. of nitrogen, source voltage 4.3 kV, capillary voltage 40 V, capillary temperature 275 °C, tube lens voltage 155 V). The samples were dissolved in methanol and applied by direct injection. As a mobile phase was used 80% methanol (flow rate 100  $\mu\text{l}/\text{min}$ ). The APCI mass spectra were recorded using an LTQ Orbitrap XL (Thermo Fisher Scientific) hybrid mass spectrometer equipped with an APCI ion source. The APCI vaporizer and heated capillary temperatures were set to 400 °C and 200 °C, respectively; the corona discharge current was 3.5  $\mu\text{A}$ . Nitrogen served both as the sheath and auxiliary gas at flow rate 55 and 5 arbitrary units, respectively. The ionization conditions were the same for low-resolution as well as high-resolution experiment. The HR spectra were acquired at a resolution of 100 000. Optical rotations were measured in  $\text{CH}_2\text{Cl}_2$  using an Autopol IV instrument (Rudolph Research Analytical). For analytical separations (CSP screening, optimization, and determination of enantiomeric excess), isocratic HPLC systems (Waters Acquity or Knauer Smartline) were used (5  $\mu\text{L}$  injection volume). Waters Acquity PDA (or Knauer Smartline 2500) and IBZ Messtechnik Chiralysers were used as detectors. For semi-preparative resolutions, Puriflash PF5.250 (Interchim) chromatograph equipped with a diode array detector was used.

TLC was performed on Silica gel 60  $\text{F}_{254}$ -coated aluminium sheets (Merck) and spots were detected by the solution of  $\text{Ce}(\text{SO}_4)_2 \cdot 4 \text{H}_2\text{O}$  (1%) and  $\text{H}_3\text{P}(\text{Mo}_3\text{O}_{10})_4$  (2%) in sulfuric acid (10%). The flash chromatography was performed on Silica gel 60 (0.040-0.063 mm, Merck). Biotage



Initiator EXP EU (300 W power) was used for reactions carried out in microwave oven. Triethylamine, *N,N*-diisopropylamine and dichloromethane were distilled from calcium hydride under nitrogen; tetrahydrofuran was freshly distilled from sodium/benzophenone under nitrogen; toluene was freshly distilled from sodium under nitrogen. Otherwise, all commercially available solvents, catalysts and reagent grade materials were used as received. The starting materials 3-bromo-4-(bromomethyl)benzotrile, (2-Naphthylmethyl)-(triphenyl)phosphonium bromide, benzaldehyde, 1-bromo-2-naphthaldehyde, 2-bromobenzaldehyde, 2-bromo-1,4-dimethylbenzene, 2-naphthaldehyde, 2-methoxycarbonylphenylboronic acid and 3-bromophenanthrene were purchased, CpCo(CO)(fum) (fum = dimethyl fumarate)<sup>1</sup>, aldehyde **16**<sup>2</sup>, methyl 2-iodobenzoate<sup>3</sup>, aldehyde **27**<sup>2</sup>, 4-Bromophenanthrene-3-carbaldehyde<sup>4</sup>, methyl 3-iodonaphthalene-2-carboxylate<sup>5</sup> were synthesized according to literature procedure.

### Spectroscopic Measurements:

**Room temperature measurements** were performed with dilute solutions of the compounds poured into a standard (10×10 mm) quartz cuvette. Absorption spectra at room temperature were recorded by using a PerkinElmer Lambda 35 spectrophotometer whereas emission spectra were obtained by using an Edinburgh Instruments FLS 1000 spectrofluorometer. Fluorescence quantum yields (FQY) of the compounds 1A, 2A, 3A, 4A and 5A were measured using as a reference standard Coumarin 153 in EtOH (FQY=0.38). A reference standard for 6A, 7A and 8A was Rh6G in EtOH (FQY=0.94). The absorption and emission spectra of aceno[n]helicenones and fluoreno[n]helicenes recorded in acetonitrile are identical with spectra recorded in dichloromethane and thus they are not presented here.

**Fluorescence decay traces** were recorded using as an excitation source pulsed DeltaDiode lasers ( $\lambda_{exc}$  = 303, 336 or 391 nm) which were installed in a Horiba Fluorolog-3 modular spectrofluorometer. Repetition rate of the diodes was either 8 or 16 MHz. Fluorescence decay curves observed at the maxima of the spectra were recorded with the aid of “time correlated” single photon counting technique (TCSPC). Decay times were determined by using a HORIBA Scientific decay analysis software – DAS6 program, which iteratively fits a theoretical curve to an experimental decay. Estimated accuracy of the obtained decay times was 50 ps.

**Emission experiments at 5 K** were done using a homemade liquid helium cryostat. Liquid solutions of the investigated compounds (concentrations  $\sim 10^{-5}$  M) were poured into a homemade, cylinder-shaped fused silica glass cuvette (inner diameter 4 mm) and quickly

---

<sup>1</sup> A. Geny, N. Agenet, L. Iannazzo, M. Malacria, C. Aubert, V. Gandon, *Angew. Chem. Int. Ed.* **2009**, *48*, 1810.

<sup>2</sup> M. Šámal, S. Chercheja, J. Rybáček, J. Vacek Chocholoušová, J. Vacek, L. Bednárová, D. Šaman, I. G. Stará, I. Starý, *J. Am. Chem. Soc.* **2015**, *137*, 8469.

<sup>3</sup> C. M. G. Azevedo, C. M. M. Afonso, J. X. Soares, S. Reis, D. Sousa, R. T. Lime, M. H. Vasconcelos, M. Pedro, J. Barbosa, L. Gales, M. M. M. Pinto, *Eur. J. Med. Chem.* **2013**, *69*, 798.

<sup>4</sup> E. Kaneko, Y. Matsumoto, K. Kamikawa, *Chem. Eur. J.* **2013**, *19*, 11837.

<sup>5</sup> C. Bosset, R. Coffinier, P. A. Peixoto, M. El Assal, L. Pouysegou, S. Quideau, K. Miqueu, J.-M. Sotiropoulos, *Angew. Chem. Int. Ed.* **2014**, *53*, 9860.

immersed into liquid nitrogen bath (77 K) in order to prevent aggregation. Cuvette with a frozen sample was quickly transferred into the cold cryostat which was in the center of a homemade synchronous-choppers spectrophosphorometer (frequency of the light chopping 800 Hz)<sup>6</sup>. Excitation source during the low-temperature experiments was either LambdaWave 395 nm (300mW) or 375 nm (200mW) diode lasers. Emission light was dispersed with the aid of a McPherson 207 monochromator and detected with a Hamamatsu H10721-20 photomultiplier (operating in photons counting mode). Phosphorescence decay curves were measured by using a “third chopper” method and accumulated with the aid of a Stanford Research SR-430 Multichannel Scaler.

**Crystallographic data** were collected with a Bruker APEX II Quasar diffractometer, equipped with a graphite monochromator centred on the path of MoK $\alpha$  radiation. Single crystals, made by slow evaporation of cyclohexane:DCM (1:1), were coated with Cargille™ NHV immersion oil and mounted on a fiber loop, followed by data collection at 120 K. The program SAINT was used to integrate the data, which was thereafter corrected using SADABS.<sup>7</sup> The structure was solved using SHELXT<sup>8</sup> and refined by a full-matrix least-squares method on F<sup>2</sup> using SHELXL-2018.<sup>9</sup> All non-hydrogen atoms were refined with anisotropic displacement parameters, whereas hydrogen atoms were assigned to ideal positions and refined isotropically using a suitable riding model. 8F crystallizes in the chiral P2<sub>1</sub>2<sub>1</sub>2<sub>1</sub> space group. However, due to the source and the absence of heavy atom, the absolute structure cannot be determined reliably (meaningless calculated Flack parameter).

The crystallographic data are listed in Table S3 (page S164) and the ORTEP-type views depicted page S164. The CIF files have been deposited at the Cambridge Crystallographic Data Centre as supplementary publication no. CCDC 2295945-2295947.

**Electrochemistry:** Cyclic voltammetry (CV) measurements were performed with a Metrohm Autolab PGSTAT101 equipped with a platinum working electrode. Ferrocene was used as an internal reference. Measurements were done in CH<sub>3</sub>CN or DMF with 0.1 M (n-Bu<sub>4</sub>N)PF<sub>6</sub> as supporting electrolyte and at scan rates ranging from 0.01 to 0.2 V/s.

**Circular dichroism** spectra were collected with JASCO\_J-815. Samples were measured in dichloromethane in specific cases in cyclohexane. Concentration of the samples were cca 1x10<sup>-5</sup>.

**Circularly polarized luminescence** was collected with JASCO\_CPL-300. Emissions of all the enantiomers were measured in dichloromethane (M  $\approx$  1x10<sup>-5</sup>) and in specific cases in cyclohexane. Each presented CPL spectra is average of twenty emission spectra.

**Theoretical calculations:** Quantum chemistry calculations at the density functional theory (DFT and TDDFT) level were performed using the Gaussian 16 package [Gaussian]. The PCM procedure was used for description of solvent effects. The structure of each molecule was optimized in the ground electronic state (S<sub>0</sub>) and the

---

<sup>6</sup> B. Kozankiewicz, J. Prochorow, *Mol. Cryst. Liq. Cryst.* **1987**, *148*, 93.

<sup>7</sup> G. M. Sheldrick, SADABS Version 2.03, Bruker Analytical X-Ray Systems, Madison, WI, USA, 2000

<sup>8</sup> G. M. Sheldrick, *Acta Cryst.* **2015**, *A71*, 3-8

<sup>9</sup> G. M. Sheldrick, *Acta Cryst.* **2015**, *C71*, 3-8.

lowest electronic excited state (S1). The coordinates can be found in the attached table S4 (page S170). After exploratory calculations using various functionals, the M06/6-31G(d,p) method was selected as the one that relatively best reproduces the electronic spectra determined experimentally.

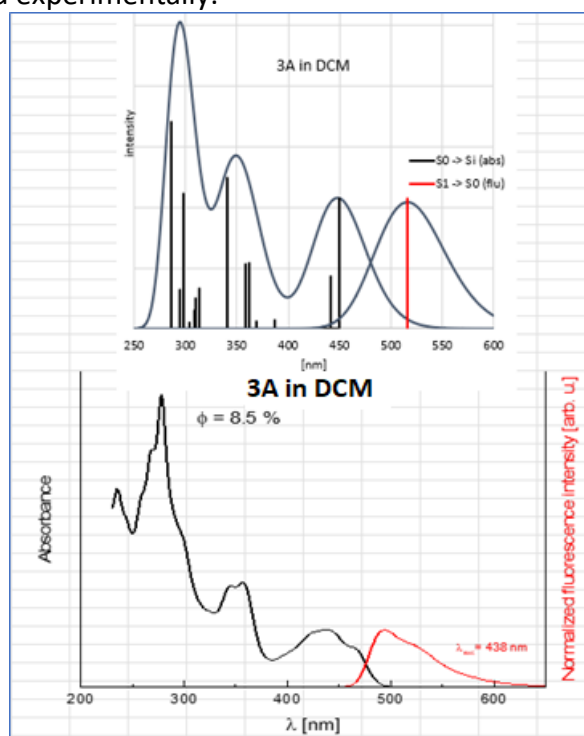

**Figure S1.** An example - experimental absorption and fluorescence spectra of 3A in DCM and corresponding simulated spectra.)

In the rest of this supplement, the calculation results are presented in the form of energy diagrams, containing information about the energies and the oscillator strengths for S0→S1fc absorption and S1→S0fc fluorescence. These are the so-called vertical electronic transitions in which the molecule does not change geometry, where in absorption it is the geometry of the energy minimum in the ground state, and in fluorescence it is the geometry of the energy minimum in the excited state. The energy diagrams also show systems of triplet states calculated for the S0 geometry.

The Gaussian 16 program was used: Gaussian 16, Revision A.03, M. J. Frisch, G. W. Trucks, H. B. Schlegel, G. E. Scuseria, M. A. Robb, J. R. Cheeseman, G. Scalmani, V. Barone, G. A. Petersson, H. Nakatsuji, X. Li, M. Caricato, A. V. Marenich, J. Bloino, B. G. Janesko, R. Gomperts, B. Mennucci, H. P. Hratchian, J. V. Ortiz, A. F. Izmaylov, J. L. Sonnenberg, D. Williams-Young, F. Ding, F. Lipparini, F. Egidi, J. Goings, B. Peng, A. Petrone, T. Henderson, D. Ranasinghe, V. G. Zakrzewski, J. Gao, N. Rega, G. Zheng, W. Liang, M. Hada, M. Ehara, K. Toyota, R. Fukuda, J. Hasegawa, M. Ishida, T. Nakajima, Y. Honda, O. Kitao, H. Nakai, T. Vreven, K. Throssell, J. A. Montgomery, Jr., J. E. Peralta, F. Ogliaro, M. J. Bearpark, J. J. Heyd, E. N. Brothers, K. N. Kudin, V. N. Staroverov, T. A. Keith, R. Kobayashi, J. Normand, K. Raghavachari, A. P. Rendell, J. C. Burant, S. S. Iyengar, J. Tomasi, M. Cossi, J. M. Millam, M. Klene, C. Adamo, R. Cammi, J. W. Ochterski, R. L. Martin, K. Morokuma, O. Farkas, J. B. Foresman, and D. J. Fox, Gaussian, Inc., Wallingford CT, 2016.

1) Calculations performed without D3 correction

Not applying the D3 correction in the calculations is an oversight, which we will remember in the future. However, we checked that in the case of the molecules we tested, it had practically no effect on the values of the determined energies.

| molecule | Electronic state                     | E[eV]      |          | E[eV]   |          | $\delta E$ [eV] |
|----------|--------------------------------------|------------|----------|---------|----------|-----------------|
|          |                                      | without D3 |          | with D3 |          |                 |
| 1A       | S <sub>1</sub>                       | 2.771      | f=0.2906 | 2.763   | f=0.2847 | -0.008          |
|          | T <sub>1</sub>                       | 1.913      |          | 1.909   |          | -0.005          |
|          | T <sub>2</sub>                       | 2.345      |          | 2.311   |          | -0.034          |
|          | T <sub>3</sub>                       | 2.578      |          | 2.558   |          | -0.020          |
|          | T <sub>4</sub>                       | 2.755      |          | 2.747   |          | -0.008          |
|          | T <sub>5</sub>                       | 3.017      |          | 3.010   |          | -0.007          |
|          | S <sub>1</sub> (opt.S <sub>1</sub> ) | 2.394      | f=0.4150 | 2.388   | f=0.4096 | -0.006          |
|          | E(0,0)                               | 2.587      |          | 2.581   |          | -0.006          |
| 7A       | S <sub>1</sub>                       | 2.513      | f=0.1077 | 2.508   | f=0.1061 | -0.005          |
|          | T <sub>1</sub>                       | 1.693      |          | 1.689   |          | -0.004          |
|          | T <sub>2</sub>                       | 2.130      |          | 2.126   |          | -0.004          |
|          | T <sub>3</sub>                       | 2.288      |          | 2.287   |          | -0.002          |
|          | T <sub>4</sub>                       | 2.394      |          | 2.390   |          | -0.004          |
|          | T <sub>5</sub>                       | 2.588      |          | 2.587   |          | -0.001          |
|          | S <sub>1</sub> (opt.S <sub>1</sub> ) | 2.104      | f=0.1796 | 2.095   | f=0.1763 | -0.009          |
|          | E(0,0)                               | 2.326      |          | 2.320   |          | -0.006          |
| 1F       | S <sub>1</sub>                       | 2.368      | f=0.0824 | 2.366   | f=0.0812 | -0.002          |
|          | T <sub>1</sub>                       | 1.630      |          | 1.628   |          | -0.003          |
|          | T <sub>2</sub>                       | 2.271      |          | 2.270   |          | -0.002          |
|          | T <sub>3</sub>                       | 2.541      |          | 2.539   |          | -0.002          |
|          | T <sub>4</sub>                       | 2.633      |          | 2.631   |          | -0.002          |
|          | T <sub>5</sub>                       | 2.837      |          | 2.836   |          | -0.001          |
|          | S <sub>1</sub> (opt.S <sub>1</sub> ) | 1.723      | f=0.0760 | 1.722   | f=0.0753 | -0.002          |
|          | E(0,0)                               | 2.054      |          | 2.052   |          | -0.002          |
| 8F       | S <sub>1</sub>                       | 2.196      | f=0.0484 | 2.192   | f=0.0480 | -0.004          |
|          | T <sub>1</sub>                       | 1.472      |          | 1.468   |          | -0.004          |
|          | T <sub>2</sub>                       | 2.099      |          | 2.095   |          | -0.004          |
|          | T <sub>3</sub>                       | 2.252      |          | 2.249   |          | -0.003          |
|          | T <sub>4</sub>                       | 2.312      |          | 2.311   |          | -0.002          |
|          | T <sub>5</sub>                       | 2.464      |          | 2.462   |          | -0.002          |
|          | S <sub>1</sub> (opt.S <sub>1</sub> ) | 1.590      | f=0.0439 | 1.582   | f=0.0432 | -0.008          |
|          | E(0,0)                               | 1.897      |          | 1.891   |          | -0.006          |

**Table S0.** Comparison of the energies of the electronic states of four molecules optimized in the ground and excited states without and with the D3 correction.

**$^1\text{H}$  NMR spectra** of compounds with condensed aromatic rings contain fine line splittings due to long range  $J(\text{H},\text{H})$  couplings over four and five bonds. In addition to  $^4J(\text{H},\text{H}-\text{meta})$  and  $^5J(\text{H},\text{H}-\text{para})$  between protons on the aromatic ring (blue arrows in Fig.2) two types of characteristic small coupling between protons from neighboring rings can be observed (red arrows in Fig.2). While the  $^4J(\text{H},\text{H}-\text{meta})$  are typically 1 - 2 Hz, all other shown couplings are smaller and about the same size (< 1Hz). This can lead to different types of multiplets with fine splittings about 0.5 Hz. Long range couplings providing a quartet of proton at 8.22 ppm in compound **2F** are shown in Figure 3B. The observation of fine splitting of multiplets requires a good magnetic field homogeneity and usually also use of weighting function for a line narrowing of signals (see Figure 3).

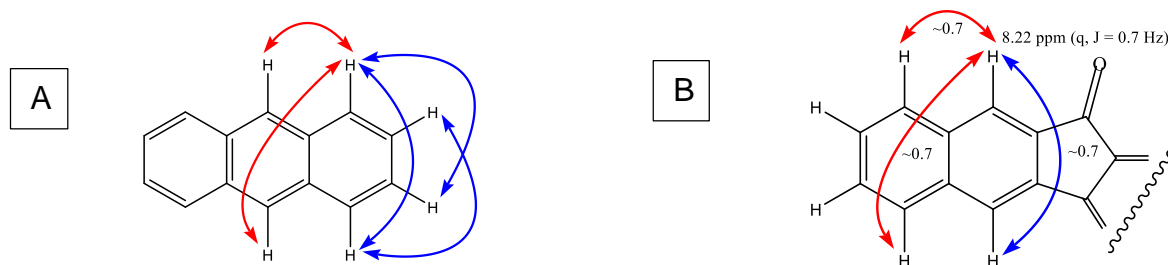

**Figure S2** Characteristic types of the long range couplings  $J(\text{H},\text{H})$  in condensed aromatic ring systems (A); structural fragment of compound **2F** and long range couplings responsible for the observation of proton at 8.22 ppm as quartet (B).

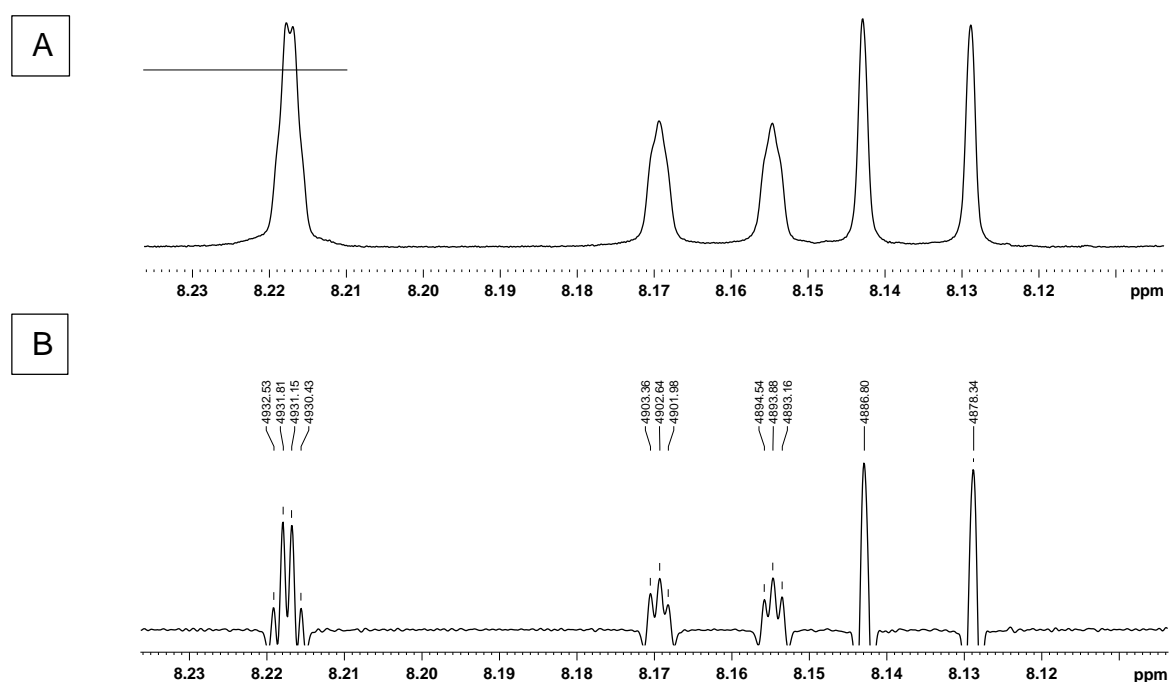

**Figure S3** Part of  $^1\text{H}$  NMR spectrum of compound **2F** after simple Fourier transformation of FID (A) and the same part of spectrum after using Gaussian apodization of FID (lb -1.5; gb 0.3) resulting in line narrowing and observation of fine splitting of signals (B).

# Series of synthesized helicenes: aceno[n]helicenes 1A-8A and fluoreno[n]helicenones 1F-8F

**aceno[6]helicenes**

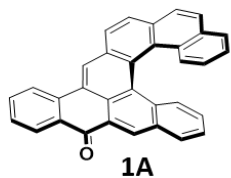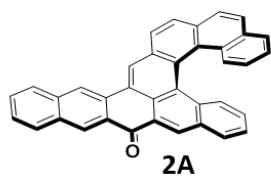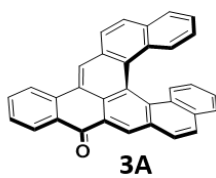

**aceno[7]helicenes**

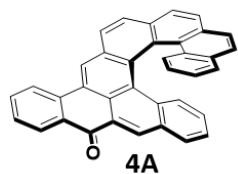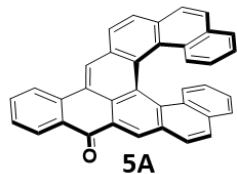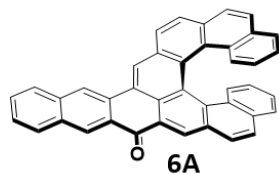

**aceno[8]helicene**

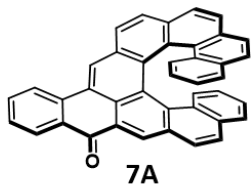

**aceno[9]helicene**

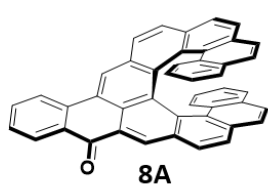

**fluoreno[6]helicenes**

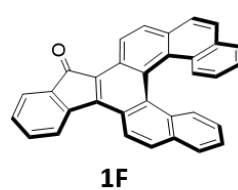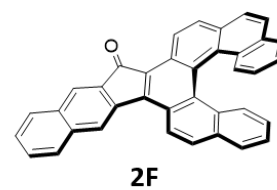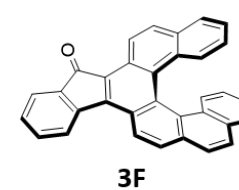

**fluoreno[7]helicenes**

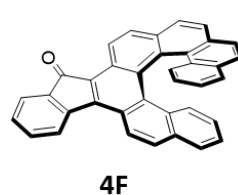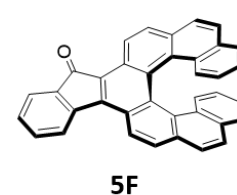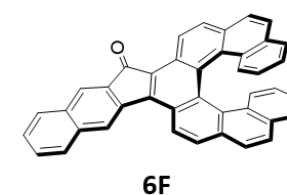

**fluoreno[8]helicene**

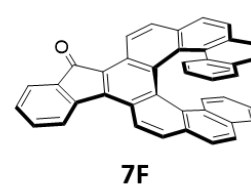

**fluoreno[9]helicene**

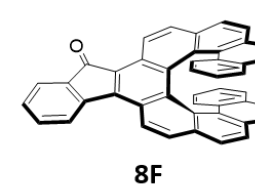

## Synthesis of compounds 1A and 1F

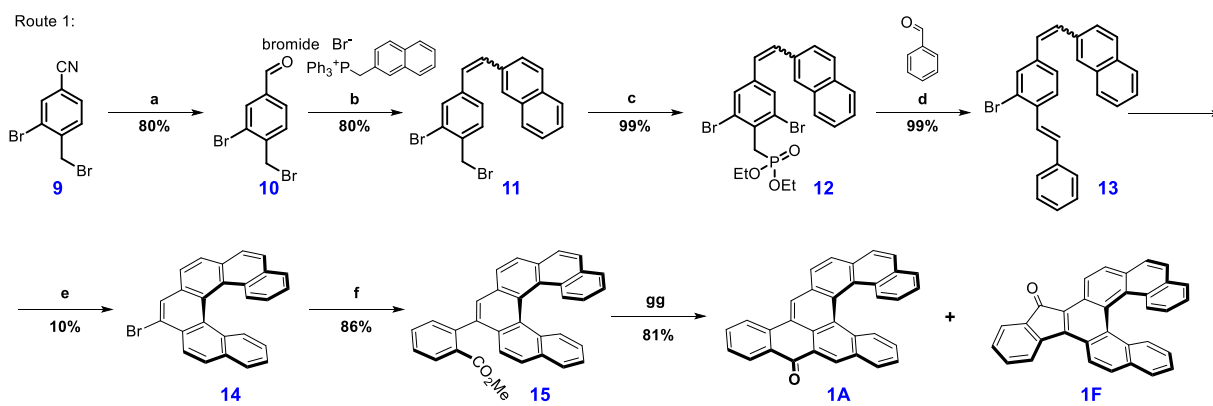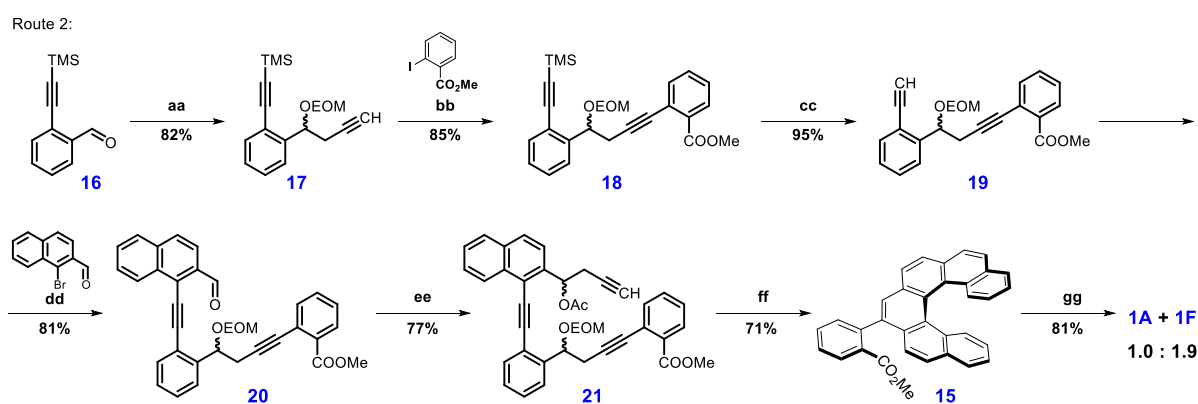

- (a) Compound **9** (1.0 equiv.), DIBAL (2.5 equiv.), PhMe, -10-0°C, 6 h;  
 (b) Compound **10** (1.0 equiv.), (naphthalen-2-ylmethyl)triphenylphosphonium bromide (1.05 equiv.), NaH (1.1 equiv.), THF, rt, 4 h;  
 (c) compound **11** (1.0 equiv.), P(OEt)<sub>3</sub> (1.05 equiv.), 120°C, 16h;  
 (d) compound **12** (1.0 equiv.), benzaldehyde (1.05 equiv.), NaH (1.1equiv.), PhMe, 120°C, 10 min;  
 (e) stilbene **13** (1.0 equiv.), I<sub>2</sub> (250mg/1L of the solvent.) cyclohexane, hv, rt, 40 h.;  
 (f) helicene **14** (1.0 equiv.), 2-methoxycarbonylphenylboronic acid (1.5 equiv.), Pd<sub>2</sub>dba<sub>3</sub> (2 mol%), Xphos (4mol%) and K<sub>3</sub>PO<sub>4</sub>·H<sub>2</sub>O (6 equiv.), PhMe, 90 °C, 12h;  
 (aa) Compound **16** (1.0 equiv.), Zn (2.0 equiv.), propargyl bromide (2.0 equiv.), THF, rt, 25 min, then DMAP (cat.), *N,N*-diisopropylethylamine (3.0 equiv.), chloromethyl ethyl ether (2.0 equiv.), DCM, rt, 16h.;  
 (bb) methyl 2-iodobenzoate (1.0 equiv.), diyne **17** (1.1 equiv.), Pd(PPh<sub>3</sub>)Cl<sub>2</sub> (2 mol%), CuI (4 mol%), *i*-Pr<sub>2</sub>NH:PhMe (3:1), 45 °C, 2 h;  
 (cc) K<sub>2</sub>CO<sub>3</sub> (1.5 equiv.), MeOH, rt, 10 min;  
 (dd) 1-bromo-2-naphthaldehyde (1.0 equiv.), diyne **19** (1.1 equiv.) Pd(PPh<sub>3</sub>)Cl<sub>2</sub> (2 mol%), CuI (4 mol%), THF:Et<sub>3</sub>N (2:1), 50 °C, 3 h;  
 (ee) Zn (2.0 equiv.), propargyl bromide (2.0 equiv.), compound **20** (1.0 equiv.), THF, rt, 15 min, then Et<sub>3</sub>N (3.0 equiv.), Ac<sub>2</sub>O (3.0 equiv.), THF, rt, 2 h;  
 (ff) triyne **21** (1.0 equiv.), CpCo(CO)(fum) (0.5 equiv.), PhCl, 170 °C, 20 min, then *p*-TsOH·H<sub>2</sub>O (5.0 equiv.), 95 °C, 1h;  
 (gg) ester **15** (1.0 equiv.), KOH (10.0 equiv.), THF:MeOH (1:1), 65 °C, 4 h, then MeSO<sub>3</sub>H, 80°C, 1h.

### 3-Bromo-4-(bromomethyl)benzaldehyde 10

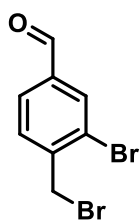

In a dry flask under inert atmosphere, 3-Bromo-4-(bromomethyl)benzointrile **9** (12g, 43.8mmol, 1 eq.) was dissolved in dry Toluene (160 mL) and cooled down to 0°C. DIBAL-H (60 mL, 25%wt. in Toluene, 2.5 equiv.) was added dropwise and the temperature was kept at 0°C for 6h while stirring. The reaction mixture was quenched with careful addition of water (100mL). The product was extracted with DCM (3x100mL) and the combined organic phases were dried and concentrated under vacuum. The product was then purified by silica gel chromatography (petroleum ether-dichloromethane 98:2). The product **10** was isolated as a white solid (7.9g, 65%). <sup>1</sup>H NMR spectrum is in agreement with the published data.<sup>10</sup>

### (E)-2-(3-Bromo-4-(bromomethyl)styryl)naphthalene 11

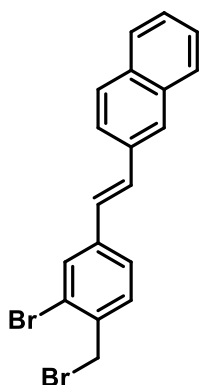

3-Bromo-4(bromomethyl)benzaldehyde **10** (4.5 g; 16.2 mmol) and (naphthalen-2-ylmethyl)triphenylphosphonium bromide (8.2 g; 17.0 mmol, 1.05 equiv.) were charged in dry round bottomed flask under inert atmosphere and dissolved in dry THF (150 mL). The reaction mixture was cooled down to 0°C and then sodium hydride (4.5 g; 17.8 mmol 60% in oil) was added portionwise. The reaction is complete when the color of the reaction turned orange (cca 4h). The mixture was kept at 0°C and quenched with water (150mL). After extraction with DCM (3x100mL), the organic portions were combined and dried over MgSO<sub>4</sub>. Solvents were removed *in vacuo*, and the residue was chromatographed on silica gel (cyclohexane) to afford the desired product **11** as a mixture of two isomers that can be converted to E-isomer by exposure to the light, white solid (5.2g, 80 %).

<sup>1</sup>H NMR (400 MHz CD<sub>2</sub>Cl<sub>2</sub>): 4.66 (s, 2H), 7.18 (d, *J* = 16.3, 1H), 7.34 (d, *J* = 16.3, 1H), 7.46-7.53 (m, 4H), 7.75 (dd, *J* = 8.6, 1.5, 1H), 7.81-7.90 (m, 5H).

<sup>13</sup>C NMR (101 MHz, CD<sub>2</sub>Cl<sub>2</sub>): 33.7, 123.3, 124.9, 126.0, 126.3, 126.5, 126.6, 127.3, 127.7, 128.1, 128.5, 130.96, 130.99, 131.5, 133.3, 133.7, 134.2, 136.0, 139.8.

**MALDI MS:** 400 ([M]<sup>+</sup>).

**HR MS-MALDI:** calc for C<sub>19</sub>H<sub>14</sub><sup>79</sup>Br<sub>2</sub> 399.9457; found 399.9460.

<sup>10</sup> G. Hao, H. Li, F. Yang, D. Dong, Z. Li, Y. Ding, W. Pan, E. Wang, R. Liu, H. Zhou *Bioorganic & Medicinal Chemistry* 29 (2021) 115871.



### Diethyl (E)-(2-bromo-4-(2-(naphthalen-2-yl)vinyl)benzyl)phosphonate 12

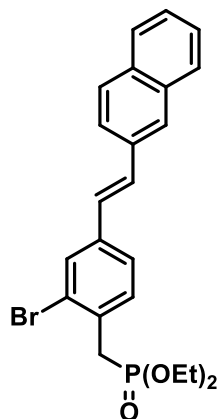

Previous compound **11** (5.2g, 13 mmol) and triethylphosphite (2.24 mL, 13.1 mmol, 1.1 equiv.) were added in well dry round bottom flask and stirred overnight at 120°C under inert atmosphere. The traces of triethylphosphite left were removed *in vacuo* by heating the reaction mixture at 70°C for 4 hours under vacuum. The product **12** as a mixture of two isomers was obtained as a yellowish solid (5.9 g, 99 %).

$^1\text{H NMR}$  (400 MHz  $\text{CD}_2\text{Cl}_2$ ): 1.27 (t,  $J = 6\text{H}$ ), 3.36 (s, 1H), 3.41 (s, 1H), 4.01 – 4.08 (m, 4H) 7.17 (d,  $J = 16.3$ , 1H), 7.30 (d,  $J = 16.3$ , 1H), 7.44 – 7.51 (m, 4H),

7.75 (dd,  $J = 8.7$ , 1.8, 1H), 7.80 – 7.88 (m, 5H).

$^{13}\text{C NMR}$  (101 MHz,  $\text{CD}_2\text{Cl}_2$ ): 16.8 (d,  $J = 6.0$ , 2C), 33.8 (d,  $J = 138.3$ ), 62.8 (d,  $J = 6.7$ , 2C), 123.9, 125.7 (d,  $J = 9.3$ ), 126.0 (d,  $J = 3.6$ ), 126.7, 127.0, 127.4 (d,  $J = 2.0$ ), 127.5, 128.2, 128.6, 128.9, 130.6 (d,  $J = 1.5$ ), 131.2 (d,  $J = 3.1$ ), 131.8 (d,  $J = 9.3$ ), 132.3 (d,  $J = 5.2$ ), 133.8, 134.2, 134.9, 138.6 (d,  $J = 4.0$ ).

**ESI MS:** 459 ( $[\text{M}+\text{H}]^+$ ).

**HR ESI MS:** calc for  $\text{C}_{23}\text{H}_{25}^{79}\text{BrO}_3\text{P}$  459.0719; found 459.0714.

### 2-((E)-3-Bromo-4-((E)-styryl)styryl)naphthalene 13

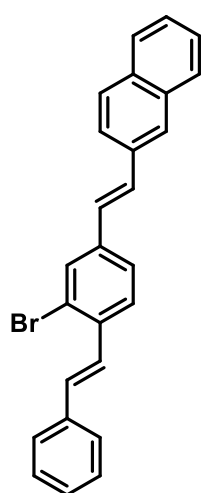

In a well dry round bottom flask were solved previous phosphonate **12** (5.9 g, 13mmol) and benzaldehyde (1.6 g, 1.05 equiv.) in dry toluene (100 mL). To this mixture was added NaH (60%, dispersion in mineral oil 3.9 g, 1.1 equiv.) and the mixture was heated at 120°C for 20 min. under inert atmosphere. The reaction mixture was cooled down to room temperature and then slowly poured into a mixture of ice-water- 37 % HCl (100 g -100 ml- 100 ml). The organic phase was separated and the water phase was extracted with DCM (3 x 100 mL). The organic portions were combined and all the volatiles were removed *in vacuo* and the residue was

chromatographed on silica gel (cyclohexane) to give the pure product **13** as a yellow solid (5.2g 99%).

**<sup>1</sup>H NMR** (400 MHz, CD<sub>2</sub>Cl<sub>2</sub>): 7.13 (d, *J* = 16.3, 1H), 7.19 (d, *J* = 16.3, 1H), 7.29 – 7.35 (m, 2H), 7.38-7.42 (m, 2H) 7.45 - 7.60 (m, 6H), 7.73 (d, *J* = 8.2, 1H), 7.76 (dd, *J* = 8.6, 1.8, 1H), 7.82-7.89 (m, 5H).

**<sup>13</sup>C NMR** (101 MHz, CD<sub>2</sub>Cl<sub>2</sub>): 123.9, 125.0, 126.2, 126.7, 127.0, 127.1, 127.4 (3C), 127.5, 127.6, 128.2, 128.6, 128.7, 128.9, 129.30 (2C), 130.5, 131.4, 131.7, 133.8, 134.2, 134.9, 136.5, 137.6, 138.9.

**MALDI MS:** 410 ([M]<sup>+</sup>).

**HR MS MALDI:** calc for C<sub>26</sub>H<sub>19</sub><sup>79</sup>Br 410.0665; found 410.0670.

### **7-Bromo[6]helicene 14**

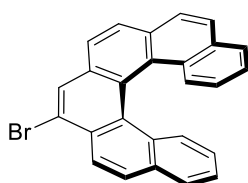

The previous stilbene **13** (2.2 g, 4.8 mmol) was dissolved in cyclohexane (1900 mL). Iodine (0.55 g, 2.16 mmol) was added to the mixture and the reaction mixture was irradiated with medium-pressure mercury (150 W) lamp for 40 h open to air. The whole reaction mixture was evaporated, and the residue was chromatographed on silica gel (cyclohexane-dichloromethane 40:1) to afford the desired product **14** (220 mg, 10%) as a yellowish solid.

**<sup>1</sup>H NMR** (400 MHz, CD<sub>2</sub>Cl<sub>2</sub>): 6.64 - 6.70 (m, 2H), 7.20 – 7.28 (m, 2H), 7.43 (d, *J* = 8.4, 1H), 7.55 (d, *J* = 8.5, 1H), 7.83 - 7.89 (m, 2H), 7.93 - 7.99 (m, 3H), 8.03 – 8.05 (m, 2H), 8.36 (s, 1H), 8.42 (d, *J* = 8.9, 1 H).

**<sup>13</sup>C NMR** (101 MHz, CD<sub>2</sub>Cl<sub>2</sub>): 121.4, 123.5, 124.6, 124.8, 125.1, 125.7, 125.8, 126.1, 126.2, 127.4, 127.6, 127.7, 127.9, 128.0, 128.2, 128.3, 128.9, 129.3, 129.56, 129.62, 129.8, 130.2, 131.4, 131.8, 132.1, 133.2.

**MALDI MS:** 406 ([M]<sup>+</sup>).

**HR MS MALDI:** calc for C<sub>26</sub>H<sub>15</sub><sup>79</sup>Br 406.0352; found 406.0354.

### **Methyl 2-hexahelicen-7-ylbenzoate 15**

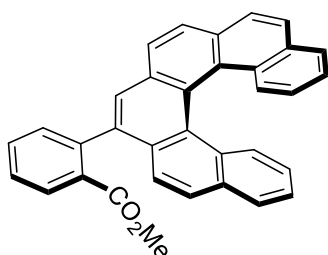

In a dry Schlenk flask was dissolved 7-bromo[6]helicene **14** (20 mg, 0.05 mmol), 2-methoxycarbonylphenylboronic acid (13 mg, 0.074 mmol, 1.5 equiv.), Pd<sub>2</sub>dba<sub>3</sub> (1 mg, 1.1 μmol, 2 mol%), Xphos (1.1 mg, 2.3 μmol, 4 mol%) and K<sub>3</sub>PO<sub>4</sub>·H<sub>2</sub>O (70 mg, 0.3 mmol, 6 equiv.) in dry toluene (6 mL). The reaction mixture was thoroughly degassed and then heated at 90 °C overnight. The solvent was evaporated *in vacuo*

and the residue was purified by column chromatography on silica gel (cyclohexane-dichloromethane 10:1). The product **15** was obtained as a yellow solid (20 mg, 86%). The  $^1\text{H}$  NMR spectrum shows a mixture of two atropodiastereomers (1:2).

$^1\text{H}$  NMR (400 MHz,  $\text{CD}_2\text{Cl}_2$ , major atropodiastereomer): 3.36 (s, 3H), 6.65 – 6.74 (m, 2H), 7.20 – 7.27 (m, 2H), 7.55 – 7.65 (m, 6H), 7.78 – 7.88 (m, 3H), 7.86 (s, 1H), 7.94 – 7.98 (m, 2H), 8.00 – 8.04 (m, 2H), 8.17 (m, 1H).

$^1\text{H}$  NMR (400 MHz,  $\text{CD}_2\text{Cl}_2$ , minor atropodiastereomer): 3.34 (s, 3H), 6.65 – 6.74 (m, 2H), 7.20 – 7.27 (m, 2H), 7.55 – 7.65 (m, 6H), 7.78 – 7.88 (m, 3H), 7.86 (s, 1H), 7.94 – 7.98 (m, 2H), 8.00 – 8.04 (m, 2H), 8.12 (m, 1H).

Other characterization data are attached for identical compound prepared by Route 2, shown below.

#### **{{2-[1-(Ethoxymethoxy)but-3-yn-1-yl]phenyl}ethynyl}(trimethyl)silane 17**

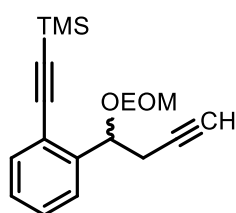

A Schlenk flask was charged with zinc powder (1.29 g, 19.8 mmol, 2.0 equiv.) and flushed with nitrogen. The freshly distilled tetrahydrofuran (8 mL) was added, the suspension was put to a water bath at room temperature and vigorously stirred. Then propargyl bromide (80 wt. % in toluene, 2.20 mL, 19.8 mmol, 2.0 equiv.) was slowly added within 10 min and the mixture was then stirred at room temperature for 10 min before it was transferred by a syringe to the second Schlenk flask with a suspension of aldehyde **16** (2.00 g, 9.88 mmol) in tetrahydrofuran (20 mL). The reaction mixture was stirred at room temperature for 5 min, then quenched with a saturated solution of ammonium chloride (20 mL) and extracted with ethyl acetate (2 x 20 mL). The combined organic layers were dried over anhydrous  $\text{MgSO}_4$  and evaporated *in vacuo*. The residue was dissolved in dichloromethane (20 mL), DMAP (5 mg, cat.), *N,N*-diisopropylethylamine (5.16 mL, 29.6 mmol, 3.0 equiv.), and chloromethyl ethyl ether (1.84 mL, 19.8 mmol, 2.0 equiv.) were added successively. The solution was stirred at room temperature overnight and then quenched with brine (20 mL). The layers were separated and water layer was extracted with dichloromethane (10 mL). The organic layers were dried over anhydrous  $\text{MgSO}_4$ , solvents were removed *in vacuo*, and the residue was chromatographed on silica gel (hexane-ethyl acetate 40:1) to afford the desired product **17** (2.43 g, 82%) as a colorless oil.

<sup>1</sup>H NMR (400 MHz, CDCl<sub>3</sub>): 0.27 (s, 9H), 1.18 (t, *J* = 7.1, 3H), 1.98 (t, *J* = 2.6, 1H), 2.61 (ddd, *J* = 16.9, 7.7, 2.6, 1H), 2.75 (ddd, *J* = 16.9, 4.2, 2.7, 1H), 3.53 (dq, *J* = 9.4, 7.1, 1H), 3.85 (dq, *J* = 9.4, 7.1, 1H), 4.62 (d, *J* = 6.9, 1H), 4.76 (d, *J* = 6.9, 1H), 5.34 (dd, *J* = 7.7, 4.1, 1H), 7.22 (td, *J* = 7.5, 1.4, 1H), 7.34 (tdd, *J* = 7.9, 1.4, 0.5, 1H), 7.43 (ddd, *J* = 7.7, 1.4, 0.6, 1H), 7.50 (ddt, *J* = 7.9, 1.2, 0.6, 1H).

<sup>13</sup>C NMR (101 MHz, CDCl<sub>3</sub>): 0.0 (3C), 15.2, 26.8, 63.6, 69.7, 73.9, 81.3, 93.5, 100.5, 102.4, 121.6, 125.8, 127.5, 128.8, 132.3, 143.3.

IR (CHCl<sub>3</sub>): 3309 m, 3070 w, 2977 w, 2961 w, 2898 w, 2887 w, sh, 2156 w, 2122 vw, 1599 vw, 1570 vw, 1478 w, 1448 w, 1410 w, 1262 w, 1251 m, 1231 w, 1160 w, sh, 1148 w, 1112 m, 1100 m, 1044 w, sh, 1018 s, 867 vs, 846 vs, 700 w, 648 m, 632 w, sh cm<sup>-1</sup>.

EI MS: 300 (M<sup>+</sup>, 4), 261(31), 232 (35), 217 (40), 209 (17), 187 (23), 143 (97), 115 (83), 73 (100).

HR EI MS: calcd for C<sub>18</sub>H<sub>24</sub>O<sub>2</sub>Si 300.1540, found 300.1543.

### Methyl 2-[4-(ethoxymethoxy)-4-{2-[(trimethylsilyl)ethynyl]phenyl}but-1-yn-1-yl]benzoate

18

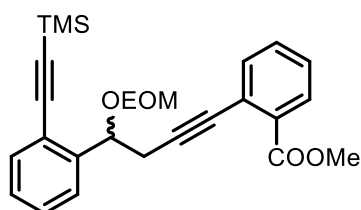

A Schlenk flask was charged with methyl 2-iodobenzoate (1.35 g, 5.15 mmol), Pd(PPh<sub>3</sub>)<sub>2</sub>Cl<sub>2</sub> (72.3 mg, 0.10 mmol, 2 mol%), CuI (39.2 mg, 0.21 mmol, 4 mol%), flushed with nitrogen, and the degassed *N,N*-diisopropylamine (45 mL) was added. The mixture was heated to 45 °C before a solution of alkyne **17** (1.70 g, 5.66 mmol, 1.1 equiv.) in degassed toluene (15 mL) was slowly added. The reaction mixture was stirred at the same temperature for 2 h. The solvents were evaporated under the reduced pressure. The residue was chromatographed on silica gel (hexane-ethyl acetate 20:1) to afford the desired product **18** (1.90 g, 85%) as a colorless oil.

<sup>1</sup>H NMR (400 MHz, CDCl<sub>3</sub>): 0.25 (s, 9H), 1.13 (t, *J* = 7.1, 3H), 2.95 (dd, *J* = 17.0, 7.2, 1H), 3.05 (dd, *J* = 17.0, 4.8, 1H), 3.53 (dq, *J* = 9.4, 7.0, 1H), 3.81 (dq, *J* = 9.4, 7.1, 1H), 3.87 (s, 3H), 4.67 (d, *J* = 6.8, 1H), 4.81 (d, *J* = 6.9, 1H), 5.43 (dd, *J* = 7.1, 4.8, 1H), 7.23 (td, *J* = 7.5, 1.3, 1H), 7.30 (ddd, *J* = 7.8, 7.3, 1.5, 1H), 7.35 (tdd, *J* = 7.9, 1.5, 0.5, 1H), 7.40 (td, *J* = 7.5, 1.5, 1H), 7.45 (ddd, *J* = 7.6, 1.4, 0.5, 1H), 7.46 (ddd, *J* = 7.8, 1.5, 0.6, 1H), 7.58 (ddt, *J* = 7.8, 1.2, 0.6, 1H), 7.87 (ddd, *J* = 7.9, 1.4, 0.6, 1H).

<sup>13</sup>C NMR (101 MHz, CDCl<sub>3</sub>): 0.0 (3C), 15.2, 28.1, 52.2, 63.6, 74.2, 80.6, 92.5, 93.7, 100.2, 102.7, 121.8, 124.4, 126.1, 127.4, 127.4, 128.9, 130.2, 131.5, 132.1, 132.3, 134.5, 143.5, 166.9.

**IR** (CHCl<sub>3</sub>): 3071 w, 2977 m, 2955 m, 2898 w, 2887 w, sh, 2845 w, 2235 w, 2156 w, 1729 s, 1719 s, sh, 1597 w, 1568 w, 1486 m, 1448 m, 1435 m, 1415 w, 1298 s, 1279 s, 1252 vs, 1233 m, 1163 w, 1149 w, sh, 1131 m, 1112 m, 1099 m, sh, 1043 s, 1018 s, 965 w, 867 vs, 845 vs, 701 w, 646 w cm<sup>-1</sup>.

**EI MS**: 434 (M<sup>+</sup>, 2), 358(33), 343 (27), 261 (100), 233 (99), 217 (100), 188 (58), 173 (90), 143 (100), 115 (99), 73 (97).

**HR EI MS**: calcd for C<sub>26</sub>H<sub>30</sub>O<sub>4</sub>Si 434.1908, found 434.1896.

### **Methyl 2-[4-(ethoxymethoxy)-4-(2-ethynylphenyl)but-1-yn-1-yl]benzoate 19**

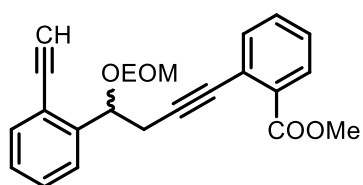

Diyne **18** (1.85 g, 4.26 mmol) was dissolved in methanol (40 mL) and potassium carbonate (883 mg, 6.39 mmol, 1.5 equiv.) was added. The mixture was stirred at room temperature for 10 min.

The reaction was quenched with a saturated ammonium chloride solution (100 mL), extracted with dichloromethane (2 x 80 mL), and the combined organic layers were dried over anhydrous magnesium sulfate. The solvents were evaporated under the reduced pressure and the residue was purified by flash chromatography on silica gel (hexane-ethyl acetate 10:1) to afford **19** (1.47 g, 95%) as a colorless oil.

**<sup>1</sup>H NMR** (400 MHz, CDCl<sub>3</sub>): 1.11 (t, *J* = 7.1, 3H), 2.97 (dd, *J* = 17.0, 7.0, 1H), 3.04 (dd, *J* = 17.0, 5.1, 1H), 3.35 (s, 1H), 3.51 (dq, *J* = 9.5, 7.1, 1H), 3.77 (dq, *J* = 9.4, 7.1, 1H), 3.87 (s, 3H), 4.67 (d, *J* = 6.9, 1H), 4.81 (d, *J* = 6.9, 1H), 5.41 (dd, *J* = 7.1, 5.1, 1H), 7.25 (td, *J* = 7.6, 1.4, 1H), 7.30 (td, *J* = 7.6, 1.5, 1H), 7.36 – 7.42 (m, 2H), 7.45 (dd, *J* = 7.7, 1.2, 1H), 7.49 (dd, *J* = 7.7, 1.3, 1H), 7.58 – 7.61 (m, 1H), 7.86 (ddd, *J* = 7.8, 1.4, 0.6, 1H).

**<sup>13</sup>C NMR** (101 MHz, CDCl<sub>3</sub>): 15.1, 28.3, 52.2, 63.6, 74.3, 80.7, 81.3, 82.6, 92.2, 93.8, 120.7, 124.3, 126.4, 127.4, 127.6, 129.1, 130.2, 131.5, 132.1, 132.9, 134.4, 143.6, 167.0.

**IR** (CHCl<sub>3</sub>): 3304 m, 3071 w, 2979 m, 2953 w, 2886 m, 2845 w, 2234 w, 2106 w, 1727 vs, 1598 w, 1568 w, 1468 w, 1448 m, 1435 m, 1297 s, 1279 s, 1256 s, 1232 m, 1164 m, 1149 w, 1131 s, 1111 s, 1099 s, 1044 vs, 1018 vs, 965 w, 701 w, 658 m, 620 m cm<sup>-1</sup>.

**EI MS**: 362 (M<sup>+</sup>, 2), 333 (15), 271 (63), 226 (43), 188 (59), 173 (91), 161 (80), 117 (100), 83 (39), 59 (61).

**HR EI MS**: calcd for C<sub>23</sub>H<sub>22</sub>O<sub>4</sub> 362.1513, found 362.1496.

**Methyl 2-[4-(ethoxymethoxy)-4-{2-[(2-formylnaphthalen-1-yl)ethynyl]phenyl}but-1-yn-1-yl]benzoate 20**

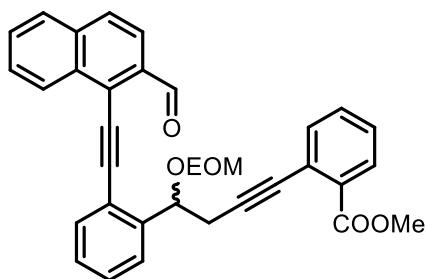

A Schlenk flask was charged with 1-bromo-2-naphthaldehyde (294 mg, 1.25 mmol), bis(triphenylphosphine)palladium chloride (17.5 mg, 0.03 mmol, 2 mol%), copper(I) iodide (9.52 mg, 0.05 mmol, 4 mol%) and flushed with argon. The degassed tetrahydrofuran (10 mL) and degassed triethylamine (10 mL) were added and the mixture was heated to 50 °C. Then diyne **19** (500 mg, 1.38 mmol, 1.1 equiv.) in degassed tetrahydrofuran (10 mL) was slowly added and the reaction was stirred at 50 °C for 3 hours. The solvents were evaporated under the reduced pressure. The residue was chromatographed on silica gel (hexane-ethyl acetate 20:1 to 10:1) to afford the desired product **20** (577 mg, 81%).

**<sup>1</sup>H NMR** (400 MHz, CDCl<sub>3</sub>): 1.11 (t, *J* = 7.1, 3H), 3.13 (d, *J* = 6.5, 2H), 3.55 (dq, *J* = 9.5, 7.0, 1H), 3.74 (s, 3H), 3.83 (dq, *J* = 9.5, 7.1, 1H), 4.73 (d, *J* = 7.0, 1H), 4.86 (d, *J* = 7.0, 1H), 5.63 (t, *J* = 6.4, 1H), 7.24 – 7.29 (m, 1H), 7.32 (td, *J* = 7.5, 1.6, 1H), 7.391 (td, *J* = 7.5, 1.4, 1H), 7.392 (ddd, *J* = 7.7, 1.5, 0.5, 1H), 7.49 (tdd, *J* = 7.8, 1.4, 0.5, 1H), 7.58 – 7.66 (m, 2H), 7.69 (ddt, *J* = 7.8, 1.3, 0.5, 1H), 7.73 (ddd, *J* = 7.6, 1.4, 0.5, 1H), 7.83 (ddd, *J* = 7.7, 1.6, 0.6, 1H), 7.86 – 7.90 (m, 2H), 7.99 (d, *J* = 8.6, 1H), 8.65 – 8.68 (m, 1H), 10.92 (d, *J* = 0.9, 1H).

**<sup>13</sup>C NMR** (101 MHz, CDCl<sub>3</sub>): 15.1, 28.8, 52.1, 63.8, 74.7, 81.2, 88.1, 91.8, 93.6, 100.0, 121.3, 122.3, 124.1, 127.0, 127.3, 127.49, 127.50, 128.0, 128.1, 128.6, 129.2, 129.5, 129.8, 130.2, 131.5, 132.0, 132.9, 133.3, 134.47, 134.53, 135.9, 143.2, 166.7, 192.1.

**IR** (CHCl<sub>3</sub>): 3063 w, 2979 w, 2953 w, 2886 w, 2847 w, 2742 w, 2236 w, 2204 w, 1727 s, 1694 vs, 1679 s, 1618 w, 1592 m, 1568 w, 1507 w, 1486 m, 1458 m, 1448 m, 1434 m, 1401 w, sh, 1385 m, 1333 m, 1297 s, 1278 s, 1256 s, 1163 w, 1151 m, sh, 1131 m, 1121 m, 1095 m, 1044 s, 1029 s, sh, 1018 s, 963 w, 871 w, 823 m, 701 w, 657 w, 570 w, 435 w cm<sup>-1</sup>.

**ESI MS**: 539 ([M+Na]<sup>+</sup>).

**HR ESI MS**: calcd for C<sub>34</sub>H<sub>28</sub>O<sub>5</sub>Na 539.1829, found 539.1827.

**Methyl 2-[4-[2-[(2-[1-(acetyloxy)but-3-yn-1-yl]naphthalen-1-yl)ethynyl]phenyl]-4-(ethoxymethoxy)but-1-yn-1-yl]benzoate 21**

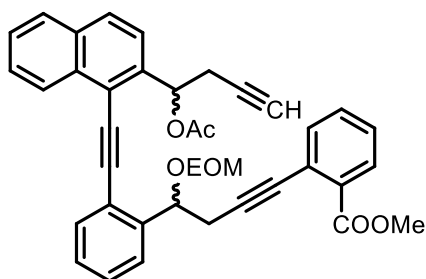

A Schlenk flask was filled with zinc powder (139 mg, 2.12 mmol, 2 equiv.) and flushed with argon. Freshly distilled tetrahydrofuran (4 mL) was added and vigorously stirred. Then propargyl bromide (80 wt. % in toluene, 236  $\mu$ L, 2.12 mmol, 2 equiv.) was added and stirred for 10 min, before it was transferred by a syringe to the second Schlenk flask, which contained aldehyde **20** (546 mg, 1.06 mmol) and tetrahydrofuran (20 mL). The reaction mixture was stirred for 5 min at room temperature, before triethylamine (443  $\mu$ L, 3.18 mmol, 3 equiv.) and acetic anhydride (303  $\mu$ L, 3.18 mmol, 3 equiv.) were added and the solution was stirred for 2 h at room temperature. The solvents were evaporated under the reduced pressure and the residue was purified by flash chromatography on silica gel (hexane-ethyl acetate 10:1) to obtain acetate **21** (488 mg, 77%) as a mixture of diastereomers in a ratio about 1:1.

**<sup>1</sup>H NMR** (400 MHz, CDCl<sub>3</sub>, mixture of diastereomers): 1.09 (t, *J* = 7.1, 3H), 1.10 (t, *J* = 7.1, 3H), 2.01 (t, *J* = 3.0, 1H), 2.02 (t, *J* = 3.0, 1H), 2.14 (s, 3H), 2.15 (s, 3H), 2.931 (ddd, *J* = 17.0, 6.6, 2.7, 1H), 2.933 (ddd, *J* = 16.9, 6.4, 2.6, 1H), 3.006 (dd, *J* = 17.1, 5.6, 1H), 3.012 (dd, *J* = 17.1, 5.6, 1H), 3.12 (dd, *J* = 17.0, 7.1, 2H), 3.21 (dd, *J* = 17.0, 5.2, 2H), 3.554 (dq, *J* = 9.8, 7.1, 1H), 3.561 (dq, *J* = 9.8, 7.1, 1H), 3.75 (s, 3H), 3.76 (s, 3H), 3.75 – 3.86 (m, 2H), 4.775 (d, *J* = 6.9, 1H), 4.781 (d, *J* = 6.9, 1H), 4.89 (d, *J* = 6.9, 1H), 4.91 (d, *J* = 6.9, 1H), 5.62 – 5.67 (m, 2H), 6.73 (t, *J* = 6.1, 2H), 7.24 – 7.57 (m, 14H), 7.636 (d, *J* = 8.6, 1H), 7.638 (d, *J* = 8.6, 1H), 7.69 (dt, *J* = 7.7, 1.4, 2H), 7.72 – 7.77 (m, 2H), 7.81 – 7.89 (m, 6H), 8.50 – 8.55 (m, 2H).

**<sup>13</sup>C NMR** (101 MHz, CDCl<sub>3</sub>, mixture of diastereomers): 15.1, 15.2, 21.2 (2C), 25.8, 25.9, 28.6, 28.7, 52.09, 52.10, 63.8 (2C), 71.11, 71.12, 72.2, 72.3, 74.89, 74.92, 79.50, 79.53, 81.0 (2C), 89.67, 89.72, 92.2, 92.3, 93.9, 94.0, 98.35, 98.36, 118.8, 118.9, 121.6, 121.7, 123.15, 123.21, 124.3 (2C), 126.7 (2C), 126.8 (3C), 126.9, 127.4 (2C), 127.5 (2C), 127.9 (2C), 128.2 (2C), 129.0, 129.1, 129.1 (2C), 130.2 (2C), 131.49, 131.51, 132.03, 132.04, 132.86, 132.87, 132.90, 133.0, 133.2 (2C), 134.50, 134.52, 139.5, 139.6, 142.8, 142.9, 166.9 (2C), 169.86, 169.88.

**IR** (CHCl<sub>3</sub>): 3309 m, 3063 w, 2978 w, 2953 w, 2931 w, 2887 w, sh, 2844 w, sh, 2233 w, 2205 vw, 2124 vw, 1733 vs, 1597 w, 1568 w, 1509 w, 1486 m, 1448 m, 1435 m, 1372 m, 1297 m, 1278 m, 1254 s, sh, 1238 vs, 1164 w, 1149 w, 1131 m, 1112 m, 1094 m, 1044 s, 1022 s, 965 w, 867 w, 821 m, 701 w, 639 w, 609 w, 436 w cm<sup>-1</sup>.

**ESI MS**: 621 ([M+Na]<sup>+</sup>).

**HR ESI MS:** calculated for  $C_{39}H_{34}O_6Na$  621.2248, found 621.2245.

### **Methyl 2-hexahelicen-7-ylbenzoate 15**

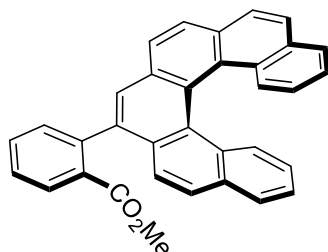

Triyne **21** (440 mg, 0.73 mmol) was loaded to a microwave vial and chlorobenzene (12 mL) was added. The solution was bubbled with nitrogen for 5 minutes before  $CpCo(CO)(fum)$  (109 mg, 0.37 mmol, 0.5 equiv, fum = dimethylfumarate) was added. The seal was closed and the reaction mixture was heated to 170 °C in the microwave reactor for 20 minutes. *p*-Toluenesulfonic acid monohydrate (694 mg, 3.65 mmol, 5 equiv.) was added and the reaction mixture was stirred for 1 h at 95 °C. The solvent was evaporated in vacuum. The residue was purified by flash chromatography on silica gel (hexane-ethyl acetate 20:1) to obtain helicene **15** (239 mg, 71%) as a mixture of two atropodiastereomers in a ratio 2:1.

**$^1H$  NMR** (400 MHz,  $CDCl_3$ , major atropodiastereomer): 3.32 (s, 3H), 6.65 – 6.75 (m, 2H), 7.19 – 7.26 (m, 2H), 7.56 – 7.73 (m, 6H), 7.77 – 7.86 (m, 3H), 7.85 (s, 1H), 7.91 – 7.97 (m, 2H), 7.98 – 8.02 (m, 2H), 8.18 (ddd,  $J = 7.8, 1.5, 0.6$ , 1H).

**$^{13}C$  NMR** (101 MHz,  $CDCl_3$ , major atropodiastereomer): 52.1, 123.6, 123.9, 124.90, 124.92, 125.7, 125.8, 126.3, 126.4, 126.9, 127.5, 127.6, 127.7, 127.7, 127.9, 127.95 (2C), 128.0, 128.11, 128.3, 129.9, 130.1, 130.2, 130.6, 131.3, 131.4, 131.7, 132.0, 132.1, 132.3, 132.4, 139.3, 141.4, 168.1.

**$^1H$  NMR** (400 MHz,  $CDCl_3$ , minor atropodiastereomer): 3.25 (s, 3H), 6.65 – 6.75 (m, 2H), 7.19 – 7.26 (m, 2H), 7.56 – 7.73 (m, 6H), 7.77 – 7.86 (m, 3H), 7.85 (s, 1H), 7.91 – 7.97 (m, 2H), 7.98 – 8.02 (m, 2H), 8.12 (m, 1H).

**$^{13}C$  NMR** (101 MHz,  $CDCl_3$ , minor atropodiastereomer): 51.9, 123.7, 123.8, 124.7, 124.7, 125.6, 125.7, 126.4, 126.9, 127.0, 127.4, 127.6, 127.7, 127.8, 127.90, 127.93 (2C), 127.95, 128.2, 128.4, 130.0, 130.1, 130.3, 130.4, 131.3, 131.5, 131.7 (2C), 132.0, 132.2, 132.5, 138.4, 141.2, 168.2.

**IR** ( $CHCl_3$ ): 3050 w, 2953 w, 2854 w, 1717 vs, 1617 vw, 1599 w, 1572 vw, 1521 vw, 1503 w, 1460 vw, 1448 w, 1434 w, 1395 vw, 1367 w, 1296 s, 1281 m, sh, 1260 m, 1192 w, 1162 vw, 1129 m, 1117 w, 1084 m, 1049 w, 1042 w, 964 w, sh, 914 vw, 889 w, 883 w, 833 s, 808 w, 662 w, 648 vw, 618 w, 585 w, 529 w  $cm^{-1}$ .

**ESI MS:** 485 ( $[M+Na]^+$ ).



**HR ESI MS:** calculated for C<sub>34</sub>H<sub>22</sub>O<sub>2</sub>Na 485.1512, found 485.1513.

**12H-Naphtho[3,2,1-gh]hexahelicen-12-one 1A**

**17H-Indeno[1,2-i]hexahelicen-17-one 1F**

Ester **15** (200 mg, 0.43 mmol) was dissolved in tetrahydrofuran (5 mL) and methanol (5 mL), and potassium hydroxide (240 mg, 4.30 mmol, 10 equiv.) was added. The mixture was heated to 65 °C and stirred for 4 h. Then the reaction was cooled to rt and diluted hydrochloric acid was added to reach pH 1. The mixture was extracted with diethyl ether (2x 20 mL), and the combined organic layers were dried over anhydrous magnesium sulfate. The solvents were evaporated under the reduced pressure to obtain crude carboxylic acid, which was directly used further. This acid was dissolved in methanesulfonic acid (10 mL) and the flask was put to the oil bath pre-heated to 80 °C. The stirring was continued for 1 h at 80 °C and then the reaction mixture was poured over crushed ice. The mixture was extracted with dichloromethane (2x 20 mL), the combined organic layers were washed with saturated sodium bicarbonate solution (10 mL), dried over anhydrous magnesium sulfate. The solvent was evaporated *in vacuo* and the residue was purified by flash chromatography on silica gel (hexane-dichloromethane 2:1 to 1:2) to afford **1A** (51.2 mg, 28%) as an orange solid and **1F** (97.3 mg, 53%) as a red solid.

**12H-Naphtho[3,2,1-gh]hexahelicen-12-one 1A**

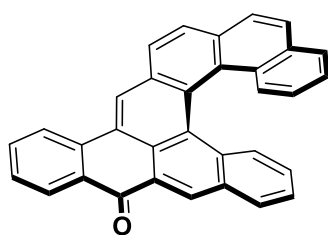

**M.p.:** 273 - 274 °C (CH<sub>3</sub>CN).

**Optical rotation:** [ $\alpha$ ]<sup>20</sup><sub>D</sub> +2147° (c 0.022, CH<sub>2</sub>Cl<sub>2</sub>); [ $\alpha$ ]<sup>20</sup><sub>D</sub> -2165° (c 0.030, CH<sub>2</sub>Cl<sub>2</sub>).

**<sup>1</sup>H NMR** (400 MHz, CDCl<sub>3</sub>): 6.67 (ddd, *J* = 8.4, 6.9, 1.4, 1H), 6.82 (ddd, *J* = 8.5, 6.9, 1.4, 1H), 7.23 (ddd, *J* = 8.0, 6.8, 1.1, 1H), 7.32 (ddd, *J* = 8.0, 6.8, 1.1, 1H), 7.51 (d, *J* = 8.5, 1H), 7.60 (td, *J* = 8.1, 1.0, 1H), 7.66 (d, *J* = 8.6, 1H), 7.78 – 7.84 (m, 2H), 7.92 (d, *J* = 8.6, 1H), 7.94 (d, *J* = 8.7, 1H), 8.01 (d, *J* = 8.2, 1H), 8.07 (d, *J* = 8.1, 1H), 8.09 (bd, *J* = 8.8, 1H), 8.49 (d, *J* = 8.1, 1H), 8.58 (dd, *J* = 7.9, 1.5, 1H), 8.80 (s, 1H), 9.23 (s, 1H).

**<sup>13</sup>C NMR** (101 MHz, CDCl<sub>3</sub>): 124.0, 124.2, 125.1, 125.2, 125.4, 125.8, 126.1, 126.3, 126.4, 126.6, 127.4 (2C), 127.8 (2C), 128.06, 128.14, 128.3, 128.4, 128.5, 128.6, 128.8, 129.9, 130.2, 130.85, 130.93, 132.1 (2C), 132.2, 132.6, 132.9, 134.0, 136.8, 184.7.

**IR** (CHCl<sub>3</sub>): 3051 w, 2956 w, 2928 w, 2856 w, 1653 vs, 1611 m, 1602 m, 1587 m, 1557 w, 1522 w, 1480 w, 1450 w, 1442 w, 1407 w, 1389 w, 1367 w, 1342 w, 1325 w, 1279 m, 1273 m, 1247 m, 1173 w, 1162 w, 1148 vw, 1082 vw, 1013 w, 934 w, 885 w, 862 w, 833 m, 692 w, 645 w, 623 w, 610 w, 582 w, 532 w, 451 vw cm<sup>-1</sup>.

**APCI MS:** 431 ([M+H]<sup>+</sup>).

**HR APCI MS:** calcd for C<sub>33</sub>H<sub>19</sub>O 431.1430, found 431.1429.

**17H-Indeno[1,2-*i*]hexahelicen-17-one 1F**

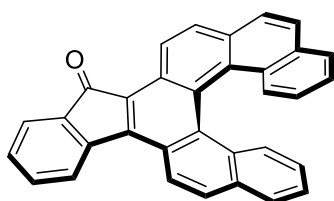

**M.p.:** 260 - 261 °C (CH<sub>3</sub>CN).

**<sup>1</sup>H NMR** (400 MHz, CDCl<sub>3</sub>): 6.62 – 6.71 (m, 2H), 7.18 (t, *J* = 7.4, 1H), 7.24 (t, *J* = 7.3, 1H), 7.32 (t, *J* = 7.4, 1H), 7.38 (d, *J* = 8.6, 1H), 7.49 (d, *J* = 9.0, 1H), 7.53 (t, *J* = 7.7, 1H), 7.71 (d, *J* = 7.2, 1H), 7.77 (d, *J* = 7.1, 1H), 7.78 (d, *J* = 8.3, 1H), 7.84 – 7.91 (m, 2H), 7.97 (bd, *J* = 8.7, 1H), 8.01 (bd, *J* = 8.3, 1H), 8.06 – 8.13 (m, 1H), 8.51 – 8.59 (m, 1H), 9.30 (bd, *J* = 8.3, 1H).

**<sup>13</sup>C NMR** (101 MHz, CDCl<sub>3</sub>): 121.6, 122.4, 123.7, 124.0, 125.0, 125.5, 125.6, 125.8, 125.9, 126.3, 126.4, 127.2, 127.5, 127.8, 127.9, 128.4, 128.5, 128.98, 129.02, 129.1, 129.3, 129.6, 130.0, 130.2, 131.3, 132.2, 132.6, 134.4, 134.6, 135.9, 143.6, 144.1, 195.7.

**IR** (CHCl<sub>3</sub>): 3052 w, 2956 m, 2927 w, 2855 w, 1700 vs, 1616 w, 1608 m, 1588 vw, 1570 vw, 1516 m, 1484 w, 1465 m, 1446 w, 1390 w, 1332 w, 1290 w, 1250 w, 1239 w, 1200 w, 1174 w, 1159 w, 1087 w, 1018 w, 983 w, 904 w, 844 m, 830 m, 806 w, 631 w, 622 m, 586 vw, 532 w, 463 vw cm<sup>-1</sup>.

**APCI MS:** 431 ([M+H]<sup>+</sup>).

**HR APCI MS:** calcd for C<sub>33</sub>H<sub>19</sub>O 431.1430, found 431.1427.

## Synthesis of compounds 2A and 2F

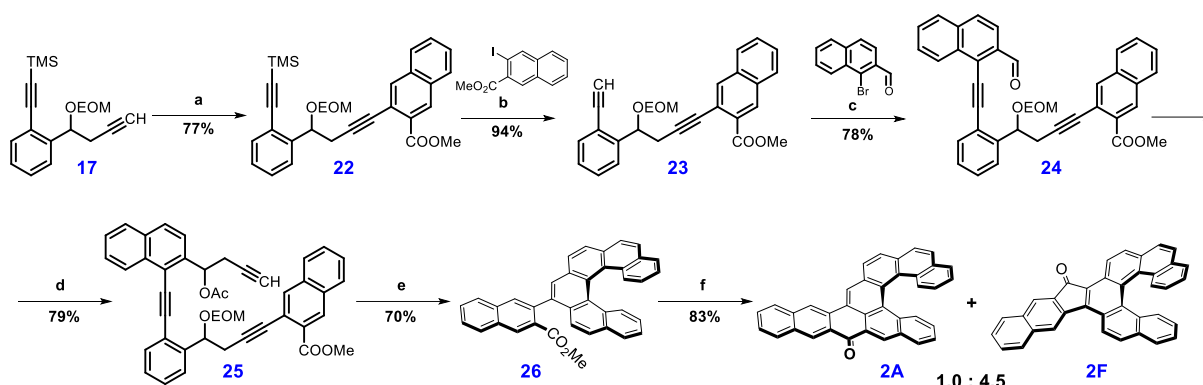

(a) Methyl 3-iodonaphthalene-2-carboxylate (1.0 equiv.), diyne **17** (1.1 equiv.), Pd(PPh<sub>3</sub>)Cl<sub>2</sub> (2 mol%), CuI (4 mol%), *i*-Pr<sub>2</sub>NH:PhMe (3:1), 45 °C, 3 h;

(b) compound **22** (1.0 equiv.), K<sub>2</sub>CO<sub>3</sub> (1.5 equiv.), MeOH, rt, 15 min;

(c) 1-bromo-2-naphthaldehyde (1.0 equiv.), diyne **23** (1.1equiv.), Pd(PPh<sub>3</sub>)Cl<sub>2</sub> (2 mol%), CuI (4 mol%), THF:Et<sub>3</sub>N (2:1), 50 °C, 3 h;

(d) Zn (2.0 equiv.), propargyl bromide (2.0 equiv.), compound **24** (1.0 equiv.), THF, rt, 15 min, then Et<sub>3</sub>N (3.0 equiv.), Ac<sub>2</sub>O (3.0 equiv.), THF, rt, 3 h;

(e) triyne **25** (1.0 equiv.), CpCo(CO)(fum) (0.5 equiv.), PhCl, 170 °C, 20 min, then *p*-TsOH.H<sub>2</sub>O (5.0 equiv.), 95 °C, 1h;

(f) ester **26** (1.0 equiv.), KOH (10.0 equiv.), THF:MeOH (1:1), 65 °C, 3 h, then MeSO<sub>3</sub>H, 80°C, 1h.

## Methyl 3-[4-(ethoxymethoxy)-4-{2-[(trimethylsilyl)ethynyl]phenyl}but-1-yn-1-yl]naphthalene-2-carboxylate 22

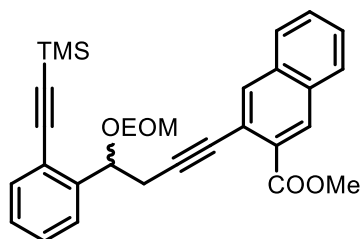

A Schlenk flask was charged with methyl 3-iodonaphthalene-2-carboxylate (568 mg, 1.82 mmol), Pd(PPh<sub>3</sub>)<sub>2</sub>Cl<sub>2</sub> (25.5 mg, 0.04 mmol, 2 mol%), CuI (13.9 mg, 0.07 mmol, 4 mol%), flushed with nitrogen, and the degassed *N,N*-diisopropylamine (15 mL) was added. The mixture was heated to 45 °C before a solution of alkyne **17** (600 mg, 2.00 mmol, 1.1 equiv.) in degassed toluene (5 mL) was slowly added. The reaction mixture was stirred at the same temperature for 3 h. The solvents were evaporated under the reduced pressure. The residue was chromatographed on silica gel (hexane-ethyl acetate 20:1) to afford the desired product **22** (679 mg, 77%) as an oil.

<sup>1</sup>H NMR (400 MHz, CDCl<sub>3</sub>): 0.27 (s, 9H), 1.15 (t, *J* = 7.1, 3H), 2.98 (dd, *J* = 17.0, 7.3, 1H), 3.09 (dd, *J* = 17.0, 4.6, 1H), 3.55 (dq, *J* = 9.5, 7.1, 1H), 3.86 (dq, *J* = 9.4, 7.0, 1H), 3.93 (s, 3H), 4.70 (d, *J* = 6.8, 1H), 4.84 (d, *J* = 6.9, 1H), 5.47 (dd, *J* = 7.3, 4.6, 1H), 7.24 (td, *J* = 7.6, 1.3, 1H), 7.37 (td, *J* = 7.6, 1.4, 1H), 7.48 (ddd, *J* = 7.6, 1.4, 0.6, 1H), 7.51 (dd, *J* = 8.1, 1.3, 1H), 7.56 (ddd, *J* = 8.2, 6.9,

1.4, 1H), 7.61 (ddd,  $J = 7.8, 1.3, 0.6$ , 1H), 7.76 (ddq,  $J = 8.0, 1.3, 0.7$ , 1H), 7.86 (ddq,  $J = 8.0, 1.3, 0.7$ , 1H), 7.97 (s, 1H), 8.43 (s, 1H).

$^{13}\text{C NMR}$  (101 MHz,  $\text{CDCl}_3$ ): 0.1 (3C), 15.2, 28.2, 52.3, 63.6, 74.3, 80.8, 91.2, 93.7, 100.2, 102.7, 120.2, 121.8, 126.2, 127.2, 127.3, 127.5, 128.6, 128.9, 128.97, 129.03, 131.5, 131.6, 132.3, 134.4, 134.5, 143.6, 167.0.

**IR** ( $\text{CHCl}_3$ ): 3061 w, 2976 m, 2955 m, 2898 w, 2886 w, sh, 2844 w, 2231 w, 2156 m, 1729 s, 1628 w, 1599 w, 1591 w, 1571 w, 1495 w, 1478 w, 1464 m, 1447 m, 1433 w, 1415 w, 1329 m, 1283 vs, 1272 s, 1251 s, 1232 m, 1160 w, sh, 1149 m, 1112 m, 1100 m, 1092 m, 1043 s, 1018 s, 957 w, 913 w, 897 m, 867 vs, 845 vs, 700 w, 646 w, 477 m  $\text{cm}^{-1}$ .

**EI MS**: 484 ( $\text{M}^+$ , 2), 408 (16), 305 (18), 261 (39), 223 (53), 179 (24), 165 (18), 143 (100), 115 (71), 73 (82).

**HR EI MS**: calcd for  $\text{C}_{30}\text{H}_{32}\text{O}_4\text{Si}$  484.2064, found 484.2057.

### **Methyl 3-[4-(ethoxymethoxy)-4-(2-ethynylphenyl)but-1-yn-1-yl]naphthalene-2-carboxylate**

**23**

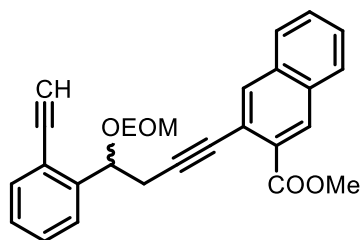

Diyne **22** (649 mg, 1.34 mmol) was dissolved in methanol (20 mL) and potassium carbonate (278 mg, 2.01 mmol, 1.5 equiv.) was added. The mixture was stirred at room temperature for 15 min. The reaction was quenched with a saturated ammonium chloride solution (50 mL), extracted with dichloromethane (2 x

30 mL), and the combined organic layers were dried over anhydrous magnesium sulfate. The solvents were evaporated under the reduced pressure and the residue was purified by flash chromatography on silica gel (hexane-ethyl acetate 10:1) to afford **23** (520 mg, 94%) as a colorless oil.

$^1\text{H NMR}$  (400 MHz,  $\text{CDCl}_3$ ): 1.13 (t,  $J = 7.1$ , 3H), 3.01 (dd,  $J = 17.0, 7.2$ , 1H), 3.08 (dd,  $J = 17.0, 5.0$ , 1H), 3.38 (s, 1H), 3.54 (dq,  $J = 9.4, 7.1$ , 1H), 3.81 (dq,  $J = 9.5, 7.1$ , 1H), 3.94 (s, 3H), 4.70 (d,  $J = 6.9$ , 1H), 4.85 (d,  $J = 6.9$ , 1H), 5.46 (dd,  $J = 7.2, 5.0$ , 1H), 7.27 (td,  $J = 7.6, 1.3$ , 1H), 7.41 (td,  $J = 7.7, 1.4$ , 1H), 7.51 (ddd,  $J = 8.2, 6.9, 1.4$ , 1H), 7.52 (dd,  $J = 8.0, 1.4$ , 1H), 7.56 (ddd,  $J = 8.2, 6.9, 1.4$ , 1H), 7.61 – 7.65 (m, 1H), 7.77 (dq,  $J = 8.1, 0.6$ , 1H), 7.87 (dq,  $J = 8.0, 0.7$ , 1H), 7.97 (s, 1H), 8.43 (s, 1H).

<sup>13</sup>C NMR (101 MHz, CDCl<sub>3</sub>): 15.1, 28.4, 52.3, 63.7, 74.4, 81.0, 81.3, 82.6, 90.9, 93.8, 120.0, 120.7, 126.5, 127.27, 127.32, 127.6, 128.7, 129.0, 129.1, 129.2, 131.5, 131.6, 133.0, 134.4, 134.5, 143.8, 167.1.

IR (CHCl<sub>3</sub>): 3304 m, 3061 w, 2979 w, 2953 w, 2887 w, 2844 w, sh, 2230 w, 2106 vw, 1727 s, 1628 w, 1602 w, sh, 1591 w, 1572 w, 1495 w, 1481 w, 1464 m, 1447 m, 1433 w, 1329 w, 1284 vs, 1271 s, sh, 1231 m, 1158 w, 1149 w, 1111 m, 1100 m, 1093 m, sh, 1042 s, 1018 s, 957 w, 914 w, 898 w, 657 w, 620 w, 477 w cm<sup>-1</sup>.

ESI MS: 435 ([M+Na]<sup>+</sup>).

HR APCI MS: calcd for C<sub>27</sub>H<sub>24</sub>O<sub>4</sub>Na 435.1567, found 435.1566.

**Methyl 3-[4-(ethoxymethoxy)-4-{2-[(2-formylnaphthalen-1-yl)ethynyl]phenyl}but-1-yn-1-yl]naphthalene-2-carboxylate 24**

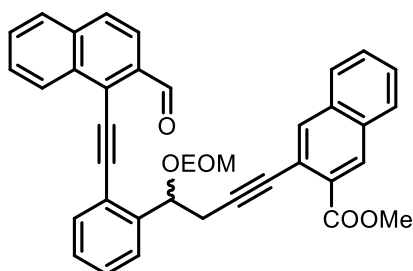

A Schlenk flask was charged with 1-bromo-2-naphthaldehyde (207 mg, 0.88 mmol), bis(triphenylphosphine)palladium chloride (12.4 mg, 0.02 mmol, 2 mol%), copper(I) iodide (6.70 mg, 0.04 mmol, 4 mol%) and flushed with argon. The degassed tetrahydrofuran (5 mL) and degassed triethylamine (5 mL)

were added and the mixture was heated to 50 °C. Then diyne **23** (400 mg, 0.97 mmol, 1.1 equiv.) in degassed tetrahydrofuran (5 mL) was slowly added and the reaction was stirred at 50 °C for 3 hours. The solvents were evaporated under the reduced pressure. The residue was chromatographed on silica gel (hexane-ethyl acetate 20:1 to 10:1) to afford the desired product **24** (389 mg, 78%).

<sup>1</sup>H NMR (400 MHz, CDCl<sub>3</sub>): 1.12 (t, *J* = 7.1, 3H), 3.14 – 3.17 (m, 2H), 3.57 (dq, *J* = 9.5, 7.0, 1H), 3.80 (s, 3H), 3.88 (dq, *J* = 9.5, 7.1, 1H), 4.76 (d, *J* = 7.0, 1H), 4.89 (d, *J* = 7.0, 1H), 5.68 (t, *J* = 6.4, 1H), 7.41 (td, *J* = 7.5, 1.4, 1H), 7.46 – 7.54 (m, 3H), 7.55 – 7.64 (m, 3H), 7.70 – 7.76 (m, 2H), 7.80 – 7.88 (m, 3H), 7.87 (s, 1H), 7.97 (d, *J* = 8.6, 1H), 8.37 (s, 1H), 8.64 – 8.69 (m, 1H), 10.94 (d, *J* = 0.9, 1H).

<sup>13</sup>C NMR (101 MHz, CDCl<sub>3</sub>): 15.2, 28.9, 52.2, 63.8, 74.8, 81.4, 88.1, 90.6, 93.6, 100.1, 119.9, 121.4, 122.2, 127.0, 127.25, 127.3 (2C), 127.5, 127.9, 128.0, 128.5, 128.6, 128.8, 128.9, 129.1, 129.4, 129.8, 131.5, 131.6, 132.9, 133.3, 134.3, 134.5, 134.6, 135.9, 143.4, 166.8, 192.0.

**IR** (CHCl<sub>3</sub>): 3062 w, 2978 w, 2952 m, 2930 m, 2889 w, 2229 w, 2203 w, 1728 s, 1694 vs, 1679 s, 1628 w, 1618 w, 1592 w, 1568 w, 1506 w, 1495 w, 1484 w, 1464 w, 1458 w, 1447 m, 1433 m, 1402 w, sh, 1385 w, 1332 m, 1284 vs, 1272 s, sh, 1257 m, 1159 w, 1149 w, 1111 m, 1095 m, 1043 m, sh, 1028 m, sh, 1018 s, 957 w, 916 w, 898 w, 871 w, 822 m, 657 w, 638 w, 570 w, 477 m, 435 w cm<sup>-1</sup>.

**ESI MS**: 589 ([M+Na]<sup>+</sup>).

**HR ESI MS**: calcd for C<sub>38</sub>H<sub>30</sub>O<sub>5</sub>Na 589.1986, found 589.1985.

**Methyl 3-{4-[2-({2-[1-(acetyloxy)but-3-yn-1-yl]naphthalen-1-yl}ethynyl)phenyl]-4-(ethoxymethoxy)but-1-yn-1-yl}naphthalene-2-carboxylate 25**

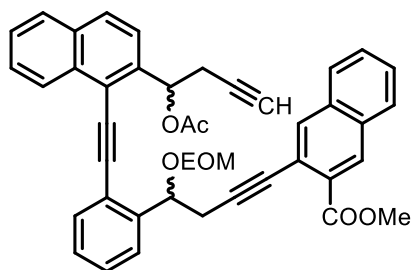

A Schlenk flask was filled with zinc powder (85.0 mg, 1.30 mmol, 2 equiv.) and flushed with argon. Freshly distilled tetrahydrofuran (3 mL) was added and vigorously stirred. Then propargyl bromide (80 wt. % in toluene, 145  $\mu$ L, 1.30 mmol, 2 equiv.) was added and stirred for 10 min, before it was transferred by a syringe to the second Schlenk flask, which contained aldehyde **24** (368 mg, 0.65 mmol) and tetrahydrofuran (15 mL). The reaction mixture was stirred for 5 min at room temperature, before triethylamine (266  $\mu$ L, 1.95 mmol, 3 equiv.) and acetic anhydride (183  $\mu$ L, 1.95 mmol, 3 equiv.) were added and the solution was stirred for 3 h at room temperature. The solvents were evaporated under the reduced pressure and the residue was purified by flash chromatography on silica gel (hexane-ethyl acetate 10:1) to obtain acetate **25** (332 mg, 79%) as a mixture of diastereomers in a ratio about 1:1.

**<sup>1</sup>H NMR** (400 MHz, CDCl<sub>3</sub>, mixture of diastereomers): 1.10 (t, *J* = 7.1, 3H), 1.11 (t, *J* = 7.1, 3H), 2.00 (t, *J* = 2.6, 1H), 2.03 (t, *J* = 2.6, 1H), 2.13 (s, 3H), 2.14 (s, 3H), 2.90 – 3.07 (m, 4H), 3.17 (dd, *J* = 17.0, 7.2, 2H), 3.24 (dd, *J* = 17.0, 5.3, 2H), 3.54 – 3.63 (m, 2H), 3.81 (s, 3H), 3.82 (s, 3H), 3.82 – 3.90 (m, 2H), 4.80 (d, *J* = 6.9, 1H), 4.81 (d, *J* = 6.9, 1H), 4.92 (d, *J* = 6.8, 1H), 4.93 (d, *J* = 6.9, 1H), 5.69 (dd, *J* = 7.2, 5.3, 1H), 5.70 (dd, *J* = 7.2, 5.2, 1H), 6.75 (t, *J* = 6.1, 2H), 7.379 (td, *J* = 7.4, 1.4, 1H), 7.380 (td, *J* = 7.4, 1.4, 1H), 7.43 – 7.56 (m, 10H), 7.58 – 7.63 (m, 2H), 7.64 (d, *J* = 8.6, 2H), 7.72 (dt, *J* = 7.8, 1.5, 2H), 7.75 – 7.78 (m, 2H), 7.81 – 7.85 (m, 4H), 7.86 (d, *J* = 8.5, 2H), 7.89 (s, 2H), 8.39 (s, 2H), 8.52 – 8.58 (m, 2H).

**<sup>13</sup>C NMR** (101 MHz, CDCl<sub>3</sub>, mixture of diastereomers): 15.16, 15.19, 21.2 (2C), 25.8, 25.9, 28.7, 28.9, 52.2 (2C), 63.8 (2C), 71.12, 71.14, 72.2, 72.3, 75.0, 75.1, 79.5 (2C), 81.2 (2C), 89.7, 89.8,

90.99, 91.03, 93.9, 94.0, 98.4 (2C), 118.85, 118.88, 120.1 (2C), 121.71, 121.72, 123.17, 123.23, 126.7 (2C), 126.77, 126.81 (2C), 126.9, 127.2 (2C), 127.3 (2C), 127.5 (2C), 127.9 (2C), 128.2 (2C), 128.5 (2C), 128.9 (2C), 129.0 (2C), 129.05 (2C), 129.1 (2C), 131.5 (2C), 131.6, 131.6, 132.87 (2C), 132.93, 133.0, 133.2 (2C), 134.3 (2C), 134.5 (2C), 139.5 (2C), 142.9, 143.0, 167.0 (2C), 169.86, 169.89.

**IR** (CHCl<sub>3</sub>): 3309 w, 3061 w, 2977 w, 2953 w, 2930 w, 2888 w, sh, 2842 w, sh, 2230 w, 2202 vw, 2124 vw, 1732 vs, 1628 w, 1592 w, 1571 w, 1509 w, 1494 w, 1484 w, 1464 w, 1447 m, 1433 w, 1372 m, 1329 m, 1283 vs, 1273 s, sh, 1234 vs, 1149 w, 1112 m, 1095 m, 1044 s, 1024 s, sh, 1019 s, 957 w, 915 w, 898 w, 867 w, 821 m, 641 w, 598 vw, 477 w, 437 w cm<sup>-1</sup>.

**ESI MS**: 671 ([M+Na]<sup>+</sup>).

**HR ESI MS**: calculated for C<sub>43</sub>H<sub>36</sub>O<sub>6</sub>Na 671.2404, found 671.2403.

### **Methyl 3-hexahelicen-7-yl-naphthalene-2-carboxylate 26**

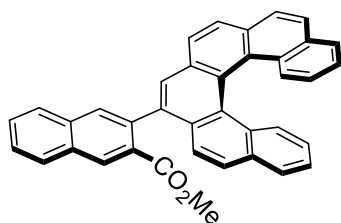

Triyne **25** (310 mg, 0.48 mmol) was loaded to a microwave vial and chlorobenzene (12 mL) was added. The solution was bubbled with nitrogen for 5 minutes before CpCo(CO)(fum) (70.8 mg, 0.24 mmol, 0.5 equiv, fum = dimethylfumarate) was added. The seal was closed and the reaction mixture was heated to 170 °C in the microwave reactor for 20 minutes. *p*-Toluenesulfonic acid monohydrate (694 mg, 3.65 mmol, 5 equiv.) was added and the reaction mixture was stirred for 1 h at 95 °C. The solvent was evaporated in vacuum. The residue was purified by flash chromatography on silica gel (hexane-ethyl acetate 20:1 to 10:1) to obtain helicene **26** (172 mg, 70%) as a mixture of two atropodiastereomers in a ratio 2:1.

**<sup>1</sup>H NMR** (400 MHz, CDCl<sub>3</sub>, major atropodiastereomer): 3.37 (s, 3H), 6.66 – 6.76 (m, 2H), 7.19 – 7.27 (m, 2H), 7.60 (d, *J* = 8.5, 1H), 7.62 – 7.72 (m, 4H), 7.78 (d, *J* = 8.5, 1H), 7.79 (m, 1H), 7.85 (dd, *J* = 8.0, 1.5, 1H), 7.91 – 7.99 (m, 4H), 8.00 – 8.04 (m, 2H), 8.07 (bs, 1H), 8.10 (m, 1H), 8.76 (s, 1H).

**<sup>13</sup>C NMR** (101 MHz, CDCl<sub>3</sub>, major atropodiastereomer): 52.2, 123.7, 123.9, 124.92, 124.93, 125.7, 125.8, 126.5, 126.7, 127.0, 127.2, 127.5, 127.66, 127.68, 127.8, 127.91, 127.94 (2C), 128.0, 128.2, 128.3, 128.8, 129.2, 129.6, 129.9, 130.1, 130.7, 131.1, 131.3, 131.4, 132.0 (2C), 132.2, 132.5, 135.1, 137.5, 139.5, 168.1.

**<sup>1</sup>H NMR** (400 MHz, CDCl<sub>3</sub>, minor atropodiastereomer): 3.28 (s, 3H), 6.66 – 6.76 (m, 2H), 7.19 – 7.27 (m, 2H), 7.60 (d, *J* = 8.5, 1H), 7.62 – 7.72 (m, 4H), 7.78 (d, *J* = 8.5, 1H), 7.79 (m, 1H), 7.83 (m, 1H), 7.91 – 7.99 (m, 4H), 8.00 – 8.04 (m, 2H), 8.08 (bs, 1H), 8.10 (m, 1H), 8.69 (s, 1H).

**<sup>13</sup>C NMR** (101 MHz, CDCl<sub>3</sub>, minor atropodiastereomer): 52.0, 123.9 (2C), 124.60, 124.7, 125.6, 125.7, 126.4, 127.1, 127.2, 127.3, 127.4, 127.6, 127.7, 127.8, 127.87, 127.91, 127.94, 128.0, 128.2, 128.4, 128.7, 129.1, 130.02, 130.03, 130.2, 130.7, 131.3, 131.4, 131.5, 131.6, 132.0, 132.2, 132.6, 134.7, 137.4, 138.5, 168.1.

**IR** (CHCl<sub>3</sub>): 3061 w, sh, 3052 w, 2952 w, 2928 w, 2855 w, 2844 w, sh, 1724 s, 1713 s, sh, 1631 w, 1594 w, 1502 w, 1489 w, 1460 w, 1447 m, 1433 w, 1326 w, 1282 vs, 1270 s, sh, 1241 w, 1198 m, 1149 w, 1137 w, 1132 w, 1075 m, 1043 w, 958 w, 915 w, 902 w, 884 w, 867 w, 833 s, 809 m, 627 w, 620 m, 525 m, 479 w cm<sup>-1</sup>.

**ESI MS**: 535 ([M+Na]<sup>+</sup>).

**HR ESI MS**: calculated for C<sub>38</sub>H<sub>24</sub>O<sub>2</sub>Na 535.1669, found 535.1670.

#### **12H-Anthra[3,2,1-*gh*]hexahelicen-12-one 2A**

#### **19H-Benzo[5,6]indeno[1,2-*i*]hexahelicen-19-one 2F**

Ester **26** (151 mg, 0.29 mmol) was dissolved in tetrahydrofuran (5 mL) and methanol (5 mL), and potassium hydroxide (163 mg, 2.90 mmol, 10 equiv.) was added. The mixture was heated to 65 °C and stirred for 3 h. Then the reaction was cooled to rt and diluted hydrochloric acid was added to reach pH 1. The mixture was extracted with diethyl ether (2x 20 mL), and the combined organic layers were dried over anhydrous magnesium sulfate. The solvents were evaporated under the reduced pressure to obtain crude carboxylic acid, which was directly used further. This acid was dissolved in methanesulfonic acid (10 mL) and the flask was put to the oil bath pre-heated to 80 °C. The stirring was continued for 1 h at 80 °C and then the reaction mixture was poured over crushed ice. The mixture was extracted with dichloromethane (2x 20 mL), the combined organic layers were washed with saturated sodium bicarbonate solution (10 mL), dried over anhydrous magnesium sulfate. The solvent was evaporated *in vacuo* and the residue was purified by flash chromatography on silica gel (hexane-toluene 1:1 to pure toluene) to afford **2A** (21.00 mg, 15%) as an orange solid and **2F** (94.6 mg, 68%) as a red solid.

#### **12H-Anthra[3,2,1-*gh*]hexahelicen-12-one 2A**



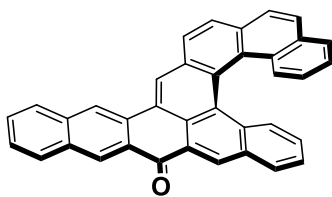

**M.p.:** 298 - 299 °C (CH<sub>3</sub>CN).

**Optical rotation:**  $[\alpha]^{20}_D +770^\circ$  (c 0.027, CH<sub>2</sub>Cl<sub>2</sub>);  $[\alpha]^{20}_D -748^\circ$  (c 0.022, CH<sub>2</sub>Cl<sub>2</sub>).

**<sup>1</sup>H NMR** (600 MHz, CD<sub>2</sub>Cl<sub>2</sub>): 6.69 (ddd, *J* = 8.4, 6.8, 1.4, 1H), 6.84 (ddd, *J* = 8.3, 6.7, 1.4, 1H), 7.25 (ddd, *J* = 7.9, 6.8, 1.2, 1H), 7.35 (ddd, *J* = 7.9, 6.7, 1.1, 1H), 7.56 (d, *J* = 8.5, 1H), 7.62 (ddd, *J* = 8.0, 6.6, 1.2, 1H), 7.69 (d, *J* = 8.1, 1H), 7.70 (ddd, *J* = 7.8, 6.6, 1.2, 1H), 7.86 (ddd, *J* = 7.9, 1.4, 0.5, 1H), 7.98 (d, *J* = 8.4, 1H), 7.99 (d, *J* = 8.5, 1H), 8.10 (d, *J* = 8.1, 1H), 8.12 (bd, *J* = 8.2, 1H), 8.14 (m, 2H), 8.21 (dd, *J* = 8.1, 0.4, 1H), 9.02 (s, 1H), 9.07 (s, 1H), 9.11 (s, 1H), 9.23 (s, 1H).

**<sup>13</sup>C NMR** (151 MHz, CD<sub>2</sub>Cl<sub>2</sub>): 123.95, 124.0, 125.3, 125.5, 126.35, 126.37, 126.76, 126.79, 127.0, 127.2, 127.7, 127.8 (2C), 128.2, 128.3, 128.4, 128.5, 128.9, 129.0, 129.07, 129.12, 129.3, 129.5, 130.1, 130.3, 130.4, 130.6, 131.3, 132.3, 132.5, 132.71, 132.73, 133.0, 133.2, 133.7, 136.8, 185.0.

**IR** (CHCl<sub>3</sub>): 3057 w, 2957 w, 2928 w, 2855 w, 1660 vs, 1624 s, 1611 w, 1595 m, 1586 w, 1577 w, 1522 w, 1513 w, 1494 w, 1445 w, 1441 w, 1358 w, 1343 m, 1286 w, 1275 m, 1266 w, 1192 vs, 1168 vw, 1036 vw, 1021 w, 959 w, 926 vw, 887 w, 833 m, 805 w, 644 w, 626 w, 608 w, 580 w, 517 w, 509 w, 475 w, sh cm<sup>-1</sup>.

**APCI MS:** 481 ([M+H]<sup>+</sup>).

**HR APCI MS:** calcd for C<sub>37</sub>H<sub>21</sub>O 481.1587, found 481.1583.

#### **19H-Benzo[5,6]indeno[1,2-f]hexahelicen-19-one 2F**

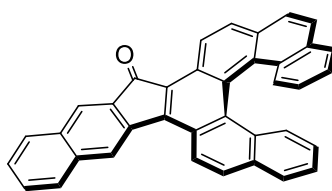

**M.p.:** 309 - 310 °C (CH<sub>3</sub>CN).

**<sup>1</sup>H NMR** (600 MHz, CD<sub>2</sub>Cl<sub>2</sub>): 6.71 (ddd, *J* = 8.5, 6.9, 1.3, 2H), 7.22 (ddd, *J* = 7.9, 6.8, 1.1, 1H), 7.30 (ddd, *J* = 7.9, 6.8, 1.1, 1H), 7.46 (ddt, *J* = 8.6, 1.2, 0.6, 1H), 7.553 (ddt, *J* = 8.6, 1.1, 0.6, 1H), 7.555 (ddd, *J* = 8.0, 6.9, 1.3, 1H), 7.64 (ddd, *J* = 8.1, 6.9, 1.3, 1H), 7.83 (ddt, *J* = 7.9, 1.3, 0.6, 1H), 7.89 (ddt, *J* = 7.8, 1.3, 0.6, 1H), 7.95 (d, *J* = 8.6, 1H), 7.968 (ddq, *J* = 7.9, 1.3, 0.7, 1H), 7.970 (d, *J* = 8.6, 1H), 8.03 (ddq, *J* = 8.0, 1.3, 0.7, 1H), 8.14 (d, *J* = 8.4, 1H), 8.16 (dt, *J* = 8.8, 0.7, 1H), 8.22 (q, *J* = 0.7, 1H), 8.58 (t, *J* = 0.7, 1H), 8.90 (d, *J* = 8.9, 1H), 9.47 (d, *J* = 8.4, 1H).

**<sup>13</sup>C NMR** (151 MHz, CD<sub>2</sub>Cl<sub>2</sub>): 122.3, 122.7, 123.6, 125.0, 125.3, 125.8, 125.9, 126.1, 126.5, 127.0, 127.5, 127.9, 128.0, 128.1, 128.2, 128.8, 128.9, 129.15, 129.17, 129.4, 129.5, 129.6, 129.8, 130.1, 130.2, 130.5, 130.8, 131.8, 132.7, 133.2, 133.8, 134.89, 134.94, 137.4, 138.5, 144.4, 194.4.

**IR** (CHCl<sub>3</sub>): 3066 w, 3045 w, 2953 w, 2921 m, 2851 m, 1692 s, 1629 vs, 1605 w, 1594 w, 1566 vw, 1511 w, sh, 1470 w, 1454 w, 1377 vw, 1333 w, 1298 w, 1243 w, 1183 w, 1171 w, 1149 w, sh, 1119 w, 1097 w, 1051 w, 919 w, 904 w, 883 m, 866 w, 841 vs, 828 w, 811 w, 667 w, 638 w, 626 w, 604 w, 580 w, 533 w, 522 w, 497 w, 473 m cm<sup>-1</sup>.

**APCI MS**: 481 ([M+H]<sup>+</sup>).

**HR APCI MS**: calcd for C<sub>37</sub>H<sub>21</sub>O 481.1587, found 481.1581.

### Synthesis of compounds 3A and 3F

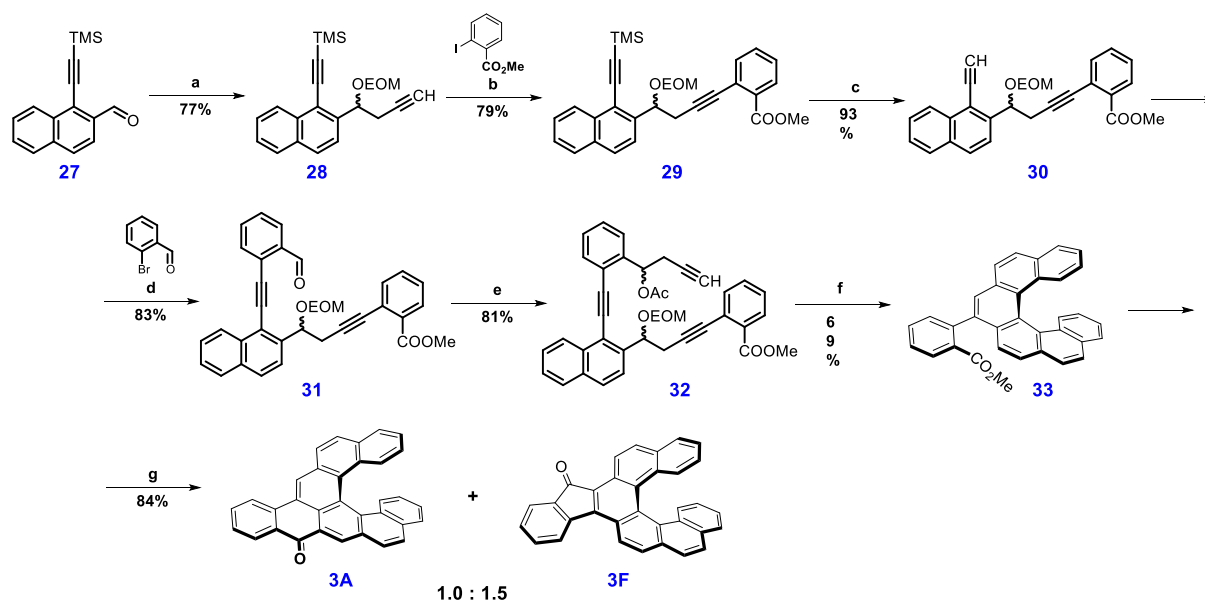

(a) Compound **27** (1.0 equiv.), Zn (2.0 equiv.), propargyl bromide (2.0 equiv.), THF, rt, 25 min, then DMAP (cat.), *N,N*-diisopropylethylamine (3.0 equiv.), chloromethyl ethyl ether (2.0 equiv.), DCM, rt, 16 h;

(b) methyl 2-iodobenzoate (1.0 equiv.), diyne **28** (1.1 equiv.), Pd(PPh<sub>3</sub>)Cl<sub>2</sub> (2 mol%), CuI (4 mol%), *i*-Pr<sub>2</sub>NH:PhMe (3:1), 45 °C, 2 h;

(c) compound **29** (1.0 equiv.), K<sub>2</sub>CO<sub>3</sub> (1.5 equiv.), MeOH, rt, 10 min;

(d) 2-bromobenzaldehyde (1.0 equiv.), diyne **30** (1.1equiv.), Pd(PPh<sub>3</sub>)Cl<sub>2</sub> (2 mol%), CuI (4 mol%), THF:Et<sub>3</sub>N (2:1), 50 °C, 4 h;

(e) Zn (2.0 equiv.), propargyl bromide (2.0 equiv.), compound **31** (1.0 equiv.), THF, rt, 15 min, then Et<sub>3</sub>N (3.0 equiv.), Ac<sub>2</sub>O (3.0 equiv.), THF, rt, 2 h;

(f) triyne **32** (1.0 equiv.), CpCo(CO)(fum) (0.5 equiv.), PhCl, 170 °C, 20 min, then *p*-TsOH.H<sub>2</sub>O (5.0 equiv.), 95 °C, 1h.

(g) ester **33** (1.0 equiv.), KOH (10.0 equiv.), THF:MeOH (1:1), 65 °C, 4 h, then MeSO<sub>3</sub>H, 80°C, 1h.

**{{2-[1-(Ethoxymethoxy)but-3-yn-1-yl]naphthalen-1-yl}ethynyl}(trimethyl)silane 28**

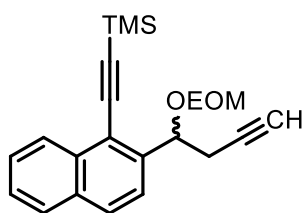

A Schlenk flask was charged with zinc powder (883 mg, 13.5 mmol, 2.0 equiv.) and flushed with nitrogen. The freshly distilled tetrahydrofuran (6 mL) was added, the suspension was put to a water bath at room temperature and vigorously stirred. Then propargyl bromide (80 wt. % in toluene, 1.50 mL, 13.5 mmol, 2.0 equiv.) was slowly added within 10 min and the mixture was then stirred at room temperature for 10 min before it was transferred by a syringe to the second Schlenk flask with a suspension of aldehyde **27** (1.70 g, 6.74 mmol) in tetrahydrofuran (20 mL). The reaction mixture was stirred at room temperature for 5 min, then quenched with a saturated solution of ammonium chloride (20 mL) and extracted with ethyl acetate (2 x 20 mL). The combined organic layers were dried over anhydrous MgSO<sub>4</sub> and evaporated *in vacuo*. The residue was dissolved in dichloromethane (25 mL), DMAP (5 mg, cat.), *N,N*-diisopropylethylamine (3.52 mL, 20.2 mmol, 3.0 equiv.), and chloromethyl ethyl ether (1.25 mL, 13.5 mmol, 2.0 equiv.) were added successively. The solution was stirred at room temperature overnight and then quenched with brine (20 mL). The layers were separated and water layer was extracted with dichloromethane (10 mL). The organic layers were dried over anhydrous MgSO<sub>4</sub>, solvents were removed *in vacuo*, and the residue was chromatographed on silica gel (hexane-ethyl acetate 40:1) to afford the desired product **28** (1.82 g, 77%) as a slightly yellow oil.

**<sup>1</sup>H NMR** (400 MHz, CDCl<sub>3</sub>): 0.36 (s, 9H), 1.19 (t, *J* = 7.1, 3H), 2.00 (t, *J* = 2.6, 1H), 2.73 (ddd, *J* = 16.9, 7.5, 2.6, 1H), 2.80 (ddd, *J* = 16.9, 4.7, 2.7, 1H), 3.55 (dq, *J* = 9.4, 7.1, 1H), 3.87 (dq, *J* = 9.4, 7.1, 1H), 4.64 (d, *J* = 6.8, 1H), 4.79 (d, *J* = 6.8, 1H), 5.63 (dd, *J* = 7.5, 4.6, 1H), 7.51 (ddd, *J* = 8.1, 6.9, 1.3, 1H), 7.58 (ddd, *J* = 8.3, 6.8, 1.4, 1H), 7.66 (d, *J* = 8.6, 1H), 7.80 – 7.86 (m, 2H), 8.36 (ddt, *J* = 8.3, 1.4, 0.8, 1H).

**<sup>13</sup>C NMR** (101 MHz, CDCl<sub>3</sub>): 0.2 (3C), 15.2, 26.8, 63.7, 69.9, 74.3, 81.2, 93.5, 100.2, 106.4, 119.1, 123.3, 126.5, 126.6, 127.2, 128.2, 129.0, 132.7, 133.3, 142.3.

**IR** (CHCl<sub>3</sub>): 3309 m, 3061 w, 2977 w, 2961 w, 2897 w, 2887 w, sh, 2151 w, 2125 w, sh, 1592 w, 1568 w, 1507 w, 1409 w, 1262 w, 1251 m, 1148 w, 1099 w, 1049 m, 1028 m, 874 s, 846 vs, 825 m, 701 w, 646 m, 450 w cm<sup>-1</sup>.

**EI MS**: 350 (M<sup>+</sup>, 3), 311 (44), 282 (50), 267 (33), 193 (72), 165 (78), 73 (100).

**HR EI MS**: calcd for C<sub>22</sub>H<sub>26</sub>O<sub>2</sub>Si 350.1697, found 350.1696.

**Methyl 2-[4-(ethoxymethoxy)-4-{1-[(trimethylsilyl)ethynyl]naphthalen-2-yl}but-1-yn-1-yl]benzoate 29**

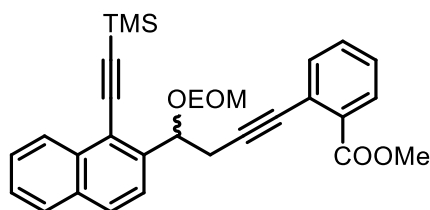

A Schlenk flask was charged with methyl 2-iodobenzoate (781 mg, 2.98 mmol), Pd(PPh<sub>3</sub>)<sub>2</sub>Cl<sub>2</sub> (42.1 mg, 0.06 mmol, 2 mol%), CuI (22.9 mg, 0.12 mmol, 4 mol%), flushed with nitrogen, and the degassed *N,N*-diisopropylamine (30 mL) was added. The mixture was heated to 45 °C before a solution of alkyne **28** (1.15 g, 3.28 mmol, 1.1 equiv.) in degassed toluene (10 mL) was slowly added. The reaction mixture was stirred at the same temperature for 2 h. The solvents were evaporated under the reduced pressure. The residue was chromatographed on silica gel (hexane-ethyl acetate 20:1) to afford the desired product **29** (1.14 g, 79%) as a yellow oil.

<sup>1</sup>H NMR (400 MHz, CDCl<sub>3</sub>): 0.34 (s, 9H), 1.15 (t, *J* = 7.1, 3H), 3.06 (dd, *J* = 16.9, 6.7, 1H), 3.11 (dd, *J* = 16.9, 5.7, 1H), 3.55 (dq, *J* = 9.5, 7.1, 1H), 3.82 (s, 3H), 3.83 (dq, *J* = 9.4, 7.1, 1H), 4.69 (d, *J* = 6.8, 1H), 4.84 (d, *J* = 6.8, 1H), 5.72 (t, *J* = 6.1, 1H), 7.30 (td, *J* = 7.3, 1.5, 1H), 7.38 (td, *J* = 7.7, 1.5, 1H), 7.45 (ddd, *J* = 7.8, 1.4, 0.7, 1H), 7.51 (ddd, *J* = 8.1, 6.8, 1.3, 1H), 7.59 (ddd, *J* = 8.4, 6.9, 1.4, 1H), 7.73 (d, *J* = 8.6, 1H), 7.81 – 7.87 (m, 2H), 7.87 (ddd, *J* = 7.8, 1.4, 0.6, 1H), 8.38 (bd, *J* = 8.4, 1H).

<sup>13</sup>C NMR (101 MHz, CDCl<sub>3</sub>): 0.2 (3C), 15.2, 28.1, 52.1, 63.7, 74.6, 80.8, 92.3, 93.7, 100.4, 106.1, 119.1, 123.6, 124.4, 126.5 (2C), 127.1, 127.4, 128.2, 128.9, 130.2, 131.5, 132.0, 132.7, 133.3, 134.6, 142.5, 166.9.

IR (CHCl<sub>3</sub>): 3062 w, 2977 w, 2955 m, 2898 w, 2887 w, sh, 2845 w, 2236 w, 2151 w, 1729 s, 1720 m, sh, 1596 w, 1568 w, 1507 w, 1486 m, 1449 w, 1435 w, 1411 w, sh, 1299 m, 1277 m, 1252 s, 1163 w, 1146 w, sh, 1131 m, 1098 m, 1043 m, 1028 s, 965 w, 879 m, 874 m, 846 s, 825 m, 701 w, 644 w, 450 w cm<sup>-1</sup>.

EI MS: 484 (M<sup>+</sup>, 2), 311 (70), 282 (67), 267 (52), 239 (22), 193 (93), 178 (20), 165 (74), 73 (100).

HR EI MS: calcd for C<sub>30</sub>H<sub>32</sub>O<sub>4</sub>Si 484.2064, found 484.2062.

**Methyl 2-[4-(ethoxymethoxy)-4-(1-ethynynaphthalen-2-yl)but-1-yn-1-yl]benzoate 30**

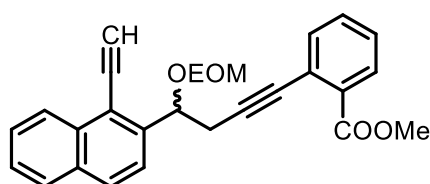

Diyne **29** (1.11 g, 2.29 mmol) was dissolved in methanol (30 mL) and potassium carbonate (475 mg, 3.44 mmol, 1.5 equiv.) was added. The mixture was stirred at room temperature for 10 min. The reaction was quenched with

a saturated ammonium chloride solution (100 mL), extracted with dichloromethane (2 x 50 mL), and the combined organic layers were dried over anhydrous magnesium sulfate. The solvents were evaporated under the reduced pressure and the residue was purified by flash chromatography on silica gel (hexane-ethyl acetate 10:1) to afford **30** (878 mg, 93%) as a colorless oil.

<sup>1</sup>H NMR (400 MHz, CDCl<sub>3</sub>): 1.12 (t, *J* = 7.1, 3H), 3.08 (d, *J* = 6.1, 2H), 3.53 (dq, *J* = 9.5, 7.0, 1H), 3.788 (dq, *J* = 9.5, 7.1, 1H), 3.795 (s, 1H), 3.83 (s, 3H), 4.69 (d, *J* = 6.9, 1H), 4.84 (d, *J* = 6.9, 1H), 5.71 (t, *J* = 6.2, 1H), 7.30 (td, *J* = 7.6, 1.5, 1H), 7.38 (td, *J* = 7.5, 1.5, 1H), 7.44 (ddd, *J* = 7.8, 1.5, 0.5, 1H), 7.52 (ddd, *J* = 8.1, 6.9, 1.3, 1H), 7.59 (ddd, *J* = 8.4, 6.9, 1.4, 1H), 7.75 (d, *J* = 8.6, 1H), 7.82 – 7.91 (m, 3H), 8.40 (bd, *J* = 8.4, 1H).

<sup>13</sup>C NMR (101 MHz, CDCl<sub>3</sub>): 15.1, 28.3, 52.1, 63.7, 74.7, 79.1, 80.9, 88.1, 92.1, 93.8, 118.0, 123.7, 124.3, 126.4, 126.6, 127.3, 127.4, 128.3, 129.3, 130.2, 131.6, 132.1, 132.7, 133.5, 134.5, 142.8, 167.0.

IR (CHCl<sub>3</sub>): 3304 m, 3063 w, 2979 m, 2953 m, 2932 w, sh, 2886 w, 2845 w, 2235 w, 2098 w, 1727 vs, 1596 w, 1568 w, 1507 w, 1486 m, 1469 w, sh, 1449 w, 1435 m, 1298 s, 1279 s, 1256 s, 1164 w, 1145 m, 1131 s, 1098 s, 1044 s, 1027 s, 965 w, 869 m, 824 m, 657 m, 617 w cm<sup>-1</sup>.

EI MS: 412 (M<sup>+</sup>, 3), 321 (19), 276 (33), 239 (100), 211 (43), 193 (86), 165 (62), 152 (99).

HR EI MS: calcd for C<sub>27</sub>H<sub>24</sub>O<sub>4</sub> 412.1669, found 412.1660.

**Methyl 2-[4-(ethoxymethoxy)-4-{1-[(2-formylphenyl)ethynyl]naphthalen-2-yl}but-1-yn-1-yl]benzoate 31**

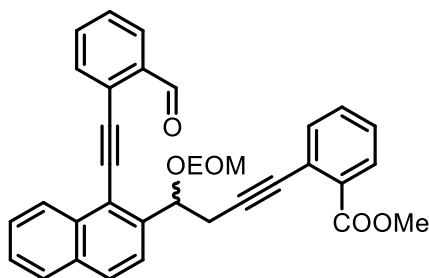

A Schlenk flask was charged with 2-bromobenzaldehyde (224 mg, 1.21 mmol), bis(triphenylphosphine)palladium chloride (17.0 mg, 0.02 mmol, 2 mol%), copper(I) iodide (9.22 mg, 0.05 mmol, 4 mol%) and flushed with argon. The degassed tetrahydrofuran (10 mL) and degassed triethylamine (10 mL) were added and the mixture was heated to 50 °C. Then diyne **30** (550 mg, 1.33 mmol, 1.1 equiv.) in degassed tetrahydrofuran (10 mL) was slowly added and the reaction was stirred at 50 °C for 4 hours. The solvents were evaporated under the reduced pressure. The residue was chromatographed on silica gel (hexane-ethyl acetate 20:1 to 10:1) to afford the desired product **31** (518 mg, 83%).

**<sup>1</sup>H NMR** (400 MHz, CDCl<sub>3</sub>): 1.12 (t, *J* = 7.1, 3H), 3.11 (dd, *J* = 16.9, 6.0, 1H), 3.16 (dd, *J* = 16.9, 6.9, 1H), 3.55 (dq, *J* = 9.5, 7.1, 1H), 3.75 (s, 3H), 3.84 (dq, *J* = 9.5, 7.1, 1H), 4.71 (d, *J* = 6.9, 1H), 4.85 (d, *J* = 6.9, 1H), 5.82 (t, *J* = 6.4, 1H), 7.26 – 7.31 (m, 1H), 7.35 (td, *J* = 7.6, 1.5, 1H), 7.42 (ddd, *J* = 7.8, 1.6, 0.6, 1H), 7.49 (dddd, *J* = 8.1, 7.4, 1.3, 0.8, 1H), 7.56 (ddd, *J* = 8.1, 6.8, 1.2, 1H), 7.58 – 7.62 (m, 1H), 7.65 (ddd, *J* = 8.3, 6.9, 1.3, 1H), 7.78 (d, *J* = 8.6, 1H), 7.84 (ddd, *J* = 7.7, 1.3, 0.6, 1H), 7.85 (ddd, *J* = 7.8, 1.5, 0.6, 1H), 7.89 (ddt, *J* = 8.0, 1.2, 0.6, 1H), 7.94 (bd, *J* = 8.7, 1H), 7.98 (ddd, *J* = 7.8, 1.5, 0.6, 1H), 8.45 (ddt, *J* = 8.4, 1.4, 0.8, 1H), 10.78 (d, *J* = 0.8, 1H).

**<sup>13</sup>C NMR** (101 MHz, CDCl<sub>3</sub>): 15.1, 28.6, 52.1, 63.8, 74.8, 81.1, 91.96, 91.98, 93.6, 95.9, 118.5, 123.8, 124.2, 126.3, 126.7, 126.8, 127.5, 127.6, 127.9, 128.5, 129.0, 129.8, 130.2, 131.6, 132.0, 132.9, 133.3, 133.9, 134.0, 134.5, 135.9, 142.6, 166.7, 191.4.

**IR** (CHCl<sub>3</sub>): 3063 w, 2978 w, 2953 m, 2931 w, 2886 w, 2855 w, 2846 w, sh, 2743 w, 2232 w, 2201 w, 1728 s, 1697 vs, 1654 w, 1594 m, 1568 w, 1508 w, 1486 m, 1449 m, 1435 m, 1298 s, 1277 m, 1255 s, 1163 wm 1147 w, sh, 1131 m, 1097 m, 1045 s, 1027 s, 964 w, 868 w, 825 m, 638 w, 437 w cm<sup>-1</sup>.

**ESI MS**: 539 ([M+Na]<sup>+</sup>).

**HR ESI MS**: calcd for C<sub>34</sub>H<sub>28</sub>O<sub>5</sub>Na 539.1829, found 539.1830.

**Methyl 2-{4-[1-({2-[1-(acetyloxy)but-3-yn-1-yl]phenyl}ethynyl)naphthalen-2-yl]-4-(ethoxymethoxy)but-1-yn-1-yl}benzoate 32**

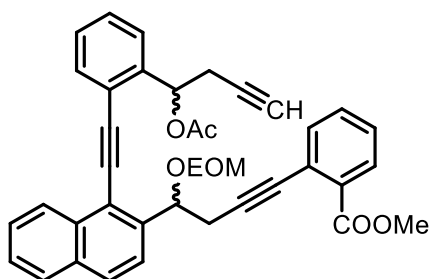

A Schlenk flask was filled with zinc powder (122 mg, 1.86 mmol, 2 equiv.) and flushed with argon. Freshly distilled tetrahydrofuran (4 mL) was added and vigorously stirred. Then propargyl bromide (80 wt. % in toluene, 207  $\mu$ L, 1.86 mmol, 2 equiv.) was added and stirred for 10 min, before it was transferred by a syringe to the second Schlenk flask, which contained aldehyde **31** (480 mg, 0.93 mmol) and tetrahydrofuran (20 mL). The reaction mixture was stirred for 5 min at room temperature, before triethylamine (380  $\mu$ L, 2.79 mmol, 3 equiv.) and acetic anhydride (264  $\mu$ L, 2.79 mmol, 3 equiv.) were added and the solution was stirred for 2 h at room temperature. The solvents were evaporated under the reduced pressure and the residue was purified by flash chromatography on silica gel (hexane-ethyl acetate 10:1) to obtain acetate **32** (451 mg, 81%) as a mixture of diastereomers in a ratio about 1:1.

**<sup>1</sup>H NMR** (400 MHz, CDCl<sub>3</sub>, mixture of diastereomers): 1.09 (t, *J* = 7.1, 3H), 1.10 (t, *J* = 7.1, 3H), 2.03 (t, *J* = 2.8, 1H), 2.04 (t, *J* = 2.7, 1H), 2.14 (s, 6H), 2.91 (dt, *J* = 17.0, 2.5, 2H), 2.88 – 2.96 (m, 2H), 3.00 (dd, *J* = 17.0, 5.4, 1H), 3.01 (dd, *J* = 17.0, 5.5, 1H), 3.10 – 3.23 (m, 4H), 3.546 (dq, *J* = 9.5, 7.1, 1H), 3.553 (dq, *J* = 9.5, 7.1, 1H), 3.767 (s, 3H), 3.773 (s, 3H), 3.77 – 3.86 (m, 2H), 4.75 (d, *J* = 6.8, 1H), 4.76 (d, *J* = 6.8, 1H), 4.88 (d, *J* = 6.8, 1H), 4.89 (d, *J* = 6.8, 1H), 5.80 (t, *J* = 6.1, 2H), 6.56 (t, *J* = 6.1, 2H), 7.26 – 7.44 (m, 10H), 7.51 – 7.57 (m, 4H), 7.64 (ddd, *J* = 8.4, 6.7, 1.2, 2H), 7.72 – 7.76 (m, 2H), 7.80 (d, *J* = 8.6, 2H), 7.83 – 7.92 (m, 6H), 8.55 (bd, *J* = 8.5, 2H).

**<sup>13</sup>C NMR** (101 MHz, CDCl<sub>3</sub>, mixture of diastereomers): 15.1 (2C), 21.1, 21.2, 26.0, 26.1, 28.5, 28.6, 52.10, 52.13, 63.8 (2C), 71.00, 71.04, 72.0, 72.1, 75.1 (2C), 79.5, 79.6, 81.00, 81.04, 90.58, 90.60, 92.3 (2C), 94.0 (2C), 97.37, 97.40, 118.76, 118.79, 121.50, 121.54, 123.85, 123.89, 124.30, 124.33, 126.2, 126.3, 126.6 (2C), 126.6 (2C), 127.4 (4C), 128.2 (2C), 128.3 (2C), 128.91, 128.94, 129.2 (2C), 130.2, 130.3, 131.6 (2C), 132.01, 132.04, 132.8, 132.9, 133.08, 133.11, 133.29, 133.33, 134.5 (2C), 140.5, 140.6, 142.11, 142.14, 166.87, 166.92, 169.8, 169.9.

**IR** (CHCl<sub>3</sub>): 3309 m, 3062 w, 2978 w, 2953 w, 2930 w, 2887 w, 2235 w, 2204 vw, 2125 vw, 1732 vs, 1597 w, 1568 w, 1508 w, 1486 m, 1468 w, sh, 1449 m, 1435 m, 1374 m, 1297 m, 1277 m, 1253 s, sh, 1238 vs, 1163 w, 1148 w, sh, 1131 m, 1109 m, 1098 m, 1043 s, 1027 s, 1019 s, sh, 965 w, 868 w, 824 w, 701 w, 641 w, 607 w, 436 w cm<sup>-1</sup>.

**ESI MS**: 621 ([M+Na]<sup>+</sup>).

**HR ESI MS**: calculated for C<sub>39</sub>H<sub>34</sub>O<sub>6</sub>Na 621.2248, found 621.2245.

### **Methyl 2-hexahelicen-8-ylbenzoate 33**

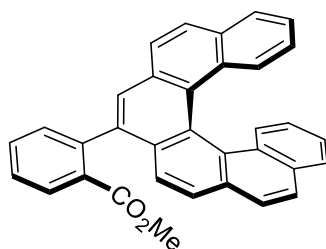

Triyne **32** (420 mg, 0.70 mmol) was loaded to a microwave vial and chlorobenzene (12 mL) was added. The solution was bubbled with nitrogen for 5 minutes before CpCo(CO)(fum) (103 mg, 0.37 mmol, 0.5 equiv, fum = dimethylfumarate) was added. The seal was closed and the reaction mixture was heated to 170 °C in the microwave reactor for 20 minutes. *p*-Toluenesulfonic acid monohydrate (666 mg, 3.50 mmol, 5 equiv.) was added and the reaction mixture was stirred for 1 h at 95 °C. The solvent was evaporated in vacuum. The residue was purified by flash chromatography on silica gel (hexane-ethyl acetate 20:1) to obtain helicene **33** (224 mg, 69%) as a mixture of two atropodiastereomers (AD) in a ratio 1.3:1.

**<sup>1</sup>H NMR** (400 MHz, CDCl<sub>3</sub>, mixture of atropodiastereomers): 3.14 (s, 3H, minor AD), 3.30 (s, 3H, major AD), 6.67 – 6.75 (m, 4H), 7.20 – 7.26 (m, 4H), 7.54 – 7.73 (m, 12H), 7.79 – 7.88 (m, 8H), 7.89 – 7.96 (m, 8H), 8.11 (dd, *J* = 7.8, 1.5, 1H, major AD), 8.14 (dd, *J* = 7.8, 1.5, 1H, minor AD).

**<sup>13</sup>C NMR** (101 MHz, CDCl<sub>3</sub>, mixture of atropodiastereomers): 51.7, 52.0, 124.2, 124.3, 124.4, 124.7, 124.80, 124.82, 124.89, 124.92, 125.5, 125.6 (2C), 125.7, 126.1, 126.2, 126.3, 126.4, 126.9, 127.1 (2C), 127.2, 127.5, 127.6, 127.66 (3C), 127.72, 127.8, 127.90, 127.94, 128.0 (3C), 128.07, 128.12, 128.2, 128.3, 129.9, 130.1, 130.2, 130.36, 130.38, 130.41, 130.43, 130.6, 130.8, 130.9, 131.77, 131.82, 131.87, 131.92, 131.95, 131.98 (3C), 132.2 (2C), 132.3, 132.48, 132.50, 132.51, 138.4, 138.7, 141.1, 141.4, 167.7, 168.2.

**IR** (CHCl<sub>3</sub>): 3051 w, 2953 w, 2843 w, sh, 1726 vs, 1717 vs, 1617 vw, 1604 w, 1598 w, 1580 w, 1572 w, 1502 vw, 1490 vw, 1457 vw, 1449 w, 1434 w, 1419 w, 1391 w, 1364 vw, 1297 vs, 1278 s, 1261 s, 1192 m, 1169 w, 1129 m, 1096 w, 1075 w, 1040 w, 965 w, sh, 891 w, 837 m, 825 w, 817 w, 808 m, 687 w, 615 w, 575 w, 517 m cm<sup>-1</sup>.

**ESI MS**: 485 ([M+Na]<sup>+</sup>).

**HR ESI MS**: calculated for C<sub>34</sub>H<sub>22</sub>O<sub>2</sub>Na 485.1512, found 485.1511.

### **12H-Naphtho[1,2,3-*jk*]hexahelicen-12-one 3A**

### **13H-Indeno[2,1-*i*]hexahelicen-13-one 3F**

Ester **33** (195 mg, 0.42 mmol) was dissolved in tetrahydrofuran (5 mL) and methanol (5 mL), and potassium hydroxide (235 mg, 4.20 mmol, 10 equiv.) was added. The mixture was heated to 65 °C and stirred for 4 h. Then the reaction was cooled to rt and diluted hydrochloric acid was added to reach pH 1. The mixture was extracted with diethyl ether (2x 20 mL), and the combined organic layers were dried over anhydrous magnesium sulfate. The solvents were evaporated under the reduced pressure to obtain crude carboxylic acid, which was directly used further. This acid was dissolved in methanesulfonic acid (10 mL) and the flask was put to the oil bath pre-heated to 80 °C. The stirring was continued for 1 h at 80 °C and then the reaction mixture was poured over crushed ice. The mixture was extracted with dichloromethane (2x 20 mL), the combined organic layers were washed with saturated sodium bicarbonate solution (10 mL), dried over anhydrous magnesium sulfate. The solvent was evaporated *in vacuo* and the residue was purified by flash chromatography on silica gel



(hexane-dichloromethane 2:1 to 1:2) to afford **3A** (59.6 mg, 33%) as an orange solid and **3F** (92.3 mg, 51%) as a red solid.

**12H-Naphtho[1,2,3-*jk*]hexahelicen-12-one 3A**

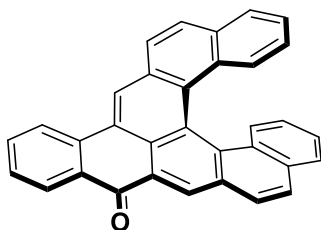

**M.p.:** 310 – 311 °C (CH<sub>3</sub>CN).

**Optical rotation:** [ $\alpha$ ]<sup>20</sup><sub>D</sub> +1094° (c 0.030, CH<sub>2</sub>Cl<sub>2</sub>); [ $\alpha$ ]<sup>20</sup><sub>D</sub> -1031° (c 0.022, CH<sub>2</sub>Cl<sub>2</sub>).

**<sup>1</sup>H NMR** (600 MHz, CD<sub>2</sub>Cl<sub>2</sub>): 6.72 (ddd, *J* = 8.5, 7.7, 1.5, 1H), 6.74 (ddd, *J* = 8.4, 6.9, 1.4, 1H), 7.25 (ddd, *J* = 8.0, 6.8, 1.2, 1H), 7.29 (ddd, *J* = 7.9, 6.8, 1.2, 1H), 7.45 (dq, *J* = 8.5, 0.9, 1H), 7.58 (dq, *J* = 8.5, 0.8, 1H), 7.63 (ddd, *J* = 8.0, 7.1, 1.1, 1H), 7.84 – 7.89 (m, 3H), 8.00 (bd, *J* = 8.3, 1H), 8.01 (d, *J* = 8.1, 1H), 8.07 (d, *J* = 8.6, 1H), 8.15 (d, *J* = 8.6, 1H), 8.52 (dd, *J* = 7.8, 1.2, 1H), 8.60 (dd, *J* = 7.9, 1.0, 1H), 8.92 (s, 1H), 9.19 (s, 1H).

**<sup>13</sup>C NMR** (151 MHz, CD<sub>2</sub>Cl<sub>2</sub>): 124.1, 125.0, 125.2, 125.4, 125.6, 125.7, 126.5, 126.79, 126.82, 127.21, 127.24, 128.0, 128.2 (3C), 128.8, 129.0, 129.2 (2C), 129.3, 129.7, 129.9, 130.0, 130.9, 131.0, 131.2, 131.4, 132.3, 133.1, 133.7, 134.1, 136.9, 184.0.

**IR** (CHCl<sub>3</sub>): 3076 w, 3053 w, 2958 w, 2927 w, 2855 w, 1651 vs, 1602 m, 1594 m, 1576 m, 1557 vw, 1505 w, 1477 w, 1457 vw, 1420 w, 1382 w, 1369 m, 1332 w, sh, 1295 m, 1271 m, 1237 w, 1162 w, 1128 w, 1024 w, 994 w, 922 w, 910 w, 887 w, 814 m, 679 w, 628 w, 610 vw, 517 w, 510 w, 475 w cm<sup>-1</sup>.

**APCI MS:** 431 ([M+H]<sup>+</sup>).

**HR APCI MS:** calcd for C<sub>33</sub>H<sub>19</sub>O 431.1430, found 431.1425.

**13H-Indeno[2,1-*i*]hexahelicen-13-one 3F**

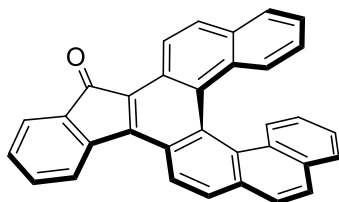

**M.p.:** 189 – 190 °C (CH<sub>3</sub>CN).

**<sup>1</sup>H NMR** (400 MHz, CDCl<sub>3</sub>): 6.63 (ddd, *J* = 8.4, 6.9, 1.4, 1H), 6.69 (ddd, *J* = 8.5, 6.9, 1.4, 1H), 7.18 (ddd, *J* = 8.0, 7.0, 1.1, 1H), 7.20 (ddd, *J* = 7.9, 6.9, 1.0, 1H), 7.32 (t, *J* = 7.3, 1H), 7.33 (d, *J* = 7.8, 1H), 7.45 (bd, *J* = 8.6, 1H), 7.50 (td, *J* = 7.5, 1.3, 1H), 7.70 (dd, *J* = 7.1, 1.3, 1H), 7.74 – 7.79 (m, 2H), 7.85 (d, *J* = 8.6, 1H), 7.94 (d, *J* = 8.3, 2H), 7.96 (d, *J* = 8.2, 1H), 8.04 (d, *J* = 7.6, 1H), 8.57 (d, *J* = 8.6, 1H), 9.24 (d, *J* = 8.9, 1H).

$^{13}\text{C}$  NMR (101 MHz,  $\text{CDCl}_3$ ): 121.8, 122.6, 123.5, 123.9, 125.3, 125.4, 125.8, 126.1, 126.15, 126.16, 127.5, 127.7, 127.74, 127.76, 127.9, 128.3, 128.5, 128.6, 129.0, 129.73, 129.74, 129.8, 130.17, 130.20, 130.4, 131.9, 132.1, 132.3, 134.3, 135.7, 143.2, 144.1, 195.6.

IR ( $\text{CHCl}_3$ ): 3083 w, sh, 3051 w, 2955 w, 2928 w, 2855 w, 1700 vs, 1620 w, 1606 w, 1589 w, 1567 w, 1555 w, 1514 w, 1498 w, 1487 w, 1465 m, 1426 w, 1421 m, 1381 m, 1340 w, 1287 w, 1252 w, 1197 w, 1174 w, 1159 w, 1090 m, 1035 vw, 1015 w, 958 m, 927 w, 868 w, 837 w, 831 m, 816 m, 651 w, 618 w, 520 m, 477 vw  $\text{cm}^{-1}$ .

APCI MS: 431 ( $[\text{M}+\text{H}]^+$ ).

HR APCI MS: calcd for  $\text{C}_{33}\text{H}_{19}\text{O}$  431.1430, found 431.1425.

### Synthesis of compounds 4A and 4F

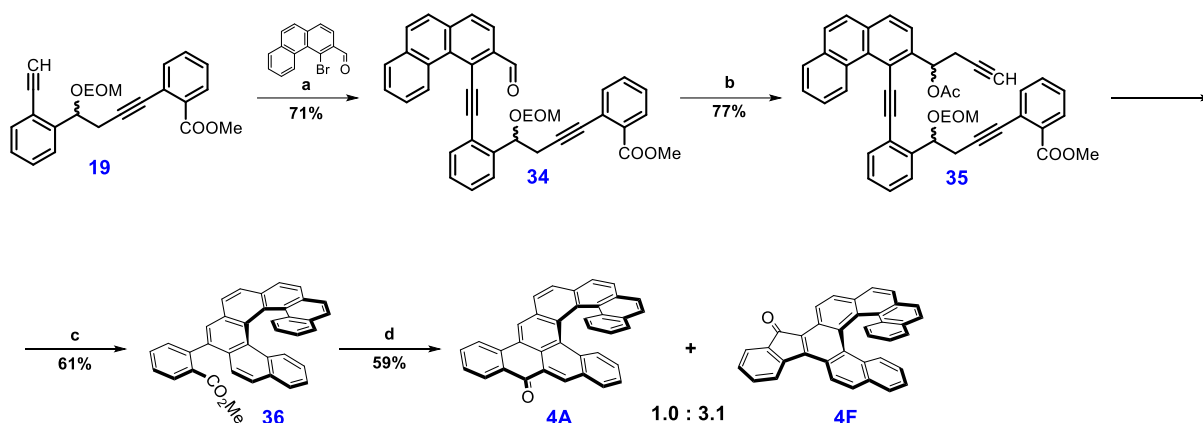

(a) 4-Bromophenanthrene-3-carbaldehyde (1.0 equiv.), diyne 19 (1.1 equiv.),  $\text{Pd}(\text{PPh}_3)\text{Cl}_2$  (2 mol%),  $\text{CuI}$  (4 mol%),  $\text{THF}:\text{Et}_3\text{N}$  (2:1),  $50^\circ\text{C}$ , 3 h;

(b)  $\text{Zn}$  (2.0 equiv.), propargyl bromide (2.0 equiv.), compound 34 (1.0 equiv.),  $\text{THF}$ , rt, 15 min, then  $\text{Et}_3\text{N}$  (3.0 equiv.),  $\text{Ac}_2\text{O}$  (3.0 equiv.),  $\text{THF}$ , rt, 4 h;

(c) triyne 35 (1.0 equiv.),  $\text{CpCo}(\text{CO})(\text{fum})$  (0.7 equiv.),  $\text{PhCl}$ ,  $180^\circ\text{C}$ , 20 min, then  $p\text{-TsOH}\cdot\text{H}_2\text{O}$  (5.0 equiv.),  $95^\circ\text{C}$ , 1 h.

(d) ester 36 (1.0 equiv.),  $\text{KOH}$  (10.0 equiv.),  $\text{THF}:\text{MeOH}$  (1:1),  $65^\circ\text{C}$ , 5 h, then  $\text{MeSO}_3\text{H}$ ,  $80^\circ\text{C}$ , 2 h.

### Methyl 2-[4-(ethoxymethoxy)-4-{2-[(3-formylphenanthren-4-yl)ethynyl]phenyl}but-1-yn-1-yl]benzoate 34

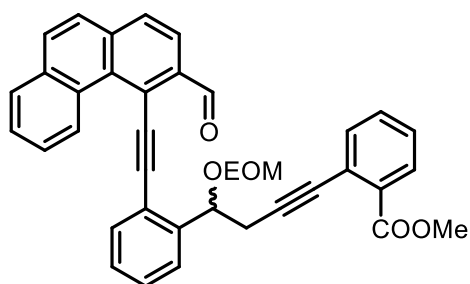

A Schlenk flask was charged with 4-bromophenanthrene-3-carbaldehyde (356 mg, 1.25 mmol), bis(triphenylphosphine)palladium chloride (17.5 mg, 0.03 mmol, 2 mol%), copper(I) iodide (9.52 mg, 0.05 mmol, 4 mol%) and flushed with argon. The

degassed tetrahydrofuran (10 mL) and degassed triethylamine (10 mL) were added and the mixture was heated to 50 °C. Then diyne **19** (500 mg, 1.38 mmol, 1.1 equiv.) in degassed tetrahydrofuran (10 mL) was slowly added and the reaction was stirred at 50 °C for 3 hours. The solvents were evaporated under the reduced pressure. The residue was chromatographed on silica gel (hexane-ethyl acetate 20:1 to 10:1) to afford the desired product **34** (502 mg, 71%).

**<sup>1</sup>H NMR** (400 MHz, CDCl<sub>3</sub>): 1.05 (t, *J* = 7.1, 3H), 3.09 (dd, *J* = 17.0, 6.2, 1H), 3.15 (dd, *J* = 17.0, 6.7, 1H), 3.51 (dq, *J* = 9.5, 7.1, 1H), 3.73 (s, 3H), 3.72 – 3.80 (m, 1H), 4.71 (d, *J* = 7.0, 1H), 4.83 (d, *J* = 7.0, 1H), 5.56 (t, *J* = 6.4, 1H), 7.18 – 7.27 (m, 2H), 7.31 – 7.35 (m, 1H), 7.41 (td, *J* = 7.5, 1.4, 1H), 7.50 (td, *J* = 7.6, 1.4, 1H), 7.66 (ddd, *J* = 8.0, 7.0, 1.2, 1H), 7.69 – 7.80 (m, 5H), 7.88 (d, *J* = 8.6, 1H), 7.90 – 7.95 (m, 2H), 8.14 (d, *J* = 8.2, 1H), 10.29 – 10.34 (m, 1H), 11.13 (d, *J* = 0.9, 1H).

**<sup>13</sup>C NMR** (101 MHz, CDCl<sub>3</sub>): 15.0, 28.8, 52.0, 63.8, 74.8, 81.4, 91.5, 92.2, 93.6, 101.3, 121.6, 124.0, 124.06, 124.07, 126.7, 126.9, 127.0, 127.3, 127.4, 127.7, 128.2, 128.9, 129.7, 129.8, 130.1, 130.4, 130.99, 131.01, 131.5, 131.9, 132.7, 133.5, 134.5, 136.5, 136.7, 143.2, 166.7, 192.9.

**IR** (CHCl<sub>3</sub>): 3066 w, 2979 w, 2953 w, 2933 w, 2885 w, 2884 w, sh, 2230 vw, 2193 w, 1727 s, 1686 vs, 1588 m, 1568 w, 1486 m, 1467 w, 1448 m, 1435 m, 1395 w, sh, 1297 m, 1278 m, 1256 vs, 1232 m, 1164 w, 1148 w, 1131 m, 1111 m, 1099 m, 1044 m, 1018 m, 964 w, 869 w, 849 m, 701 w, 637 w, 521 w cm<sup>-1</sup>.

**ESI MS**: 589 ([M+Na]<sup>+</sup>).

**HR APCI MS**: calcd for C<sub>38</sub>H<sub>30</sub>O<sub>5</sub>Na 589.1986, found 589.1984.

**Methyl 2-{4-[2-({3-[1-(acetyloxy)but-3-yn-1-yl]phenanthren-4-yl}ethynyl)phenyl]-4-(ethoxymethoxy)but-1-yn-1-yl}benzoate 35**

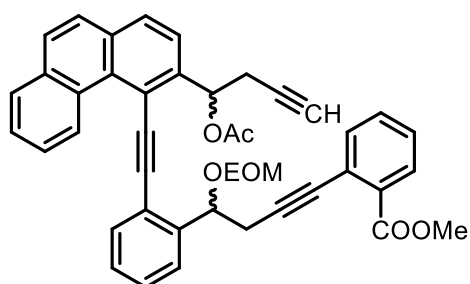

A Schlenk flask was filled with zinc powder (106 mg, 1.62 mmol, 2 equiv.) and flushed with argon. Freshly distilled tetrahydrofuran (4 mL) was added and vigorously stirred. Then propargyl bromide (80 wt. % in toluene, 180 μL, 1.62 mmol, 2 equiv.) was added and stirred for 10 min, before it was transferred by a syringe to the second Schlenk flask, which contained aldehyde **34** (461 mg, 0.81 mmol) and

tetrahydrofuran (20 mL). The reaction mixture was stirred for 5 min at room temperature, before triethylamine (331  $\mu$ L, 2.43 mmol, 3 equiv.) and acetic anhydride (230  $\mu$ L, 2.43 mmol, 3 equiv.) were added and the solution was stirred for 4 h at room temperature. The solvents were evaporated under the reduced pressure and the residue was purified by flash chromatography on silica gel (hexane-ethyl acetate 10:1) to obtain acetate **35** (405 mg, 77%) as a mixture of diastereomers in a ratio about 1:1.

**<sup>1</sup>H NMR** (400 MHz, CDCl<sub>3</sub>, mixture of diastereomers): 0.98 (t, *J* = 7.1, 3H), 1.02 (t, *J* = 7.1, 3H), 2.02 (t, *J* = 2.6, 1H), 2.03 (t, *J* = 2.6, 1H), 2.17 (s, 3H), 2.18 (s, 3H), 2.95 (dt, *J* = 17.1, 6.5, 2H), 3.08 (dt, *J* = 17.1, 5.1, 2H), 3.16 – 3.21 (m, 4H), 3.48 (dq, *J* = 9.4, 7.0, 1H), 3.51 (dq, *J* = 9.4, 7.0, 1H), 3.66 – 3.75 (m, 2H), 3.73 (s, 3H), 3.75 (s, 3H), 4.76 (d, *J* = 6.8, 1H), 4.77 (d, *J* = 6.9, 1H), 4.85 (d, *J* = 6.8, 1H), 4.89 (d, *J* = 6.8, 1H), 5.63 (t, *J* = 6.1, 1H), 5.64 (t, *J* = 6.1, 1H), 6.96 (t, *J* = 6.1, 1H), 6.97 (t, *J* = 6.1, 1H), 7.19 – 7.29 (m, 4H), 7.30 – 7.36 (m, 2H), 7.397 (td, *J* = 7.5, 1.5, 1H), 7.400 (td, *J* = 7.5, 1.5, 1H), 7.44 – 7.49 (m, 2H), 7.59 (ddd, *J* = 8.0, 7.0, 1.1, 1H), 7.60 (ddd, *J* = 8.0, 7.0, 1.1, 1H), 7.69 (d, *J* = 8.8, 2H), 7.71 – 7.85 (m, 12H), 7.88 (dt, *J* = 7.9, 1.6, 2H), 7.91 (bd, *J* = 8.3, 2H), 10.34 – 10.38 (m, 2H).

**<sup>13</sup>C NMR** (101 MHz, CDCl<sub>3</sub>, mixture of diastereomers): 14.98, 15.03, 21.2 (2C), 25.96, 26.04, 28.8, 28.9, 52.0, 52.1, 63.77, 63.82, 71.17, 71.20, 71.9, 72.0, 74.9, 75.0, 79.7 (2C), 81.2, 81.3, 92.0, 92.1, 93.6, 93.8, 94.0, 94.1, 99.7, 99.9, 117.0 (2C), 121.8 (2C), 121.9 (2C), 123.7, 123.8, 124.22, 124.23, 126.32, 126.34, 126.67, 126.71, 127.08 (2C), 127.13 (2C), 127.2 (2C), 127.30, 127.32, 128.03, 128.04, 128.4 (2C), 128.6 (2C), 129.1, 129.2, 129.7, 129.8, 130.12, 130.14, 130.8 (2C), 131.4, 131.5, 131.9, 132.0, 132.7 (2C), 132.8, 132.9, 133.44 (2C), 134.46, 134.50, 142.3, 142.4, 142.9 (2C), 166.87 (2C), 169.88, 169.91.

**IR** (CHCl<sub>3</sub>): 3309 m, 3054 w, 2979 w, 2952 w, 2933 w, 2886 w, 2845 w, 2232 w, 2192 vw, 2124 vw, 1732 vs, 1625 vw, 1597 w, 1568 w, 1486 m, 1448 m, 1435 m, 1373 m, 1297 m, 1278 m, 1253 s, 1238 vs, 1163 w, 1147 w, 1131 m, 1111 m, 1099 m, 1044 vs, 1022 s, 965 w, 868 w, 845 m, 701 w, 640 w, 602 w cm<sup>-1</sup>.

**ESI MS**: 671 ([M+Na]<sup>+</sup>).

**HR ESI MS**: calculated for C<sub>43</sub>H<sub>36</sub>O<sub>6</sub>Na 671.2404, found 671.2402.

### Methyl 2-heptahelicen-7-ylbenzoate 36

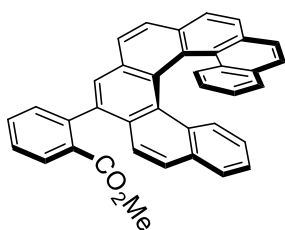

Triyne **35** (364 mg, 0.56 mmol) was loaded to a microwave vial and chlorobenzene (12 mL) was added. The solution was bubbled with nitrogen for 5 minutes before CpCo(CO)(fum) (109 mg, 0.39 mmol, 0.7 equiv, fum = dimethylfumarate) was added. The seal was closed and the reaction mixture was heated to 180 °C in the microwave reactor for 20 minutes. *p*-Toluenesulfonic acid monohydrate (532 mg, 2.80 mmol, 5 equiv.) was added and the reaction mixture was stirred for 1 h at 95 °C. The solvent was evaporated in vacuum. The residue was purified by flash chromatography on silica gel (hexane-ethyl acetate 20:1) to obtain helicene **36** (175 mg, 61%) as a mixture of two atropodiastereomers in a ratio 3.7:1.

<sup>1</sup>H NMR (400 MHz, CDCl<sub>3</sub>, major atropodiastereomer): 3.71 (s, 3H), 6.42 (ddd, *J* = 8.4, 6.9, 1.4, 1H), 6.54 (ddd, *J* = 8.4, 6.9, 1.5, 1H), 6.90 (ddd, *J* = 8.0, 6.9, 1.2, 1H), 6.92 (ddd, *J* = 8.2, 6.9, 1.2, 1H), 7.21 (dd, *J* = 8.5, 1.1, 1H), 7.25 – 7.29 (m, 1H), 7.32 (dd, *J* = 8.0, 1.4, 1H), 7.36 (d, *J* = 8.8, 1H), 7.38 (d, *J* = 8.7, 1H), 7.48 – 7.53 (m, 2H), 7.53 (d, *J* = 8.7, 1H), 7.61 (td, *J* = 7.6, 1.5, 1H), 7.68 (td, *J* = 7.5, 1.5, 1H), 7.83 (s, 1H), 7.94 (d, *J* = 8.2, 1H), 7.99 – 8.04 (m, 3H), 8.05 (d, *J* = 8.2, 1H), 8.23 (dd, *J* = 7.8, 1.5, 1H).

<sup>13</sup>C NMR (101 MHz, CDCl<sub>3</sub>, major atropodiastereomer): 52.1, 123.2, 123.8, 123.9, 124.8, 124.9, 125.01, 125.04, 125.1, 125.6, 125.8, 126.0, 126.5, 126.7, 126.8, 127.0, 127.2 (2C), 127.4, 127.5, 128.0, 128.3, 128.4, 129.5, 129.6, 130.0, 130.5, 131.0, 131.30, 131.34, 131.5, 131.8, 132.0, 132.2 (2C), 139.6, 141.9, 167.6.

IR (CHCl<sub>3</sub>): 3053 w, 2953 w, 2928 w, 2855 w, 2844 w, sh, 1723 vs, 1617 vw, 1599 w, 1571 w, 1541 w, 1497 w, 1488 w, 1470 w, sh, 1447 w, 1434 m, 1417 vw, 1359 w, sh, 1294 s, 1275 m, 1260 s, 1238 w, 1163 w, 1133 m, 1091 m, 1073 w, 1044 w, 1035 w, 964 w, 889 w, 881 w, 838 vs, 825 m, 688 w, 648 w, 613 m, 604 w, 588 w, 566 w, 534 w, 525 w, 472 vw cm<sup>-1</sup>.

ESI MS: 535 ([M+Na]<sup>+</sup>).

HR ESI MS: calcd for C<sub>38</sub>H<sub>24</sub>O<sub>2</sub>Na 535.1669, found 535.1670.

### 14H-Naphtho[3,2,1-*gh*]heptahelicen-14-one 4A

### 15H-Indeno[1,2-*i*]heptahelicen-15-one 4F

Ester **36** (152 mg, 0.30 mmol) was dissolved in tetrahydrofuran (4 mL) and methanol (4 mL), and potassium hydroxide (168 mg, 3.00 mmol, 10 equiv.) was added. The mixture was heated

to 65 °C and stirred for 5 h. Then the reaction was cooled to rt and diluted hydrochloric acid was added to reach pH 1. The mixture was extracted with diethyl ether (2x 20 mL), and the combined organic layers were dried over anhydrous magnesium sulfate. The solvents were evaporated under the reduced pressure to obtain crude carboxylic acid, which was directly used further. This acid was dissolved in methanesulfonic acid (10 mL) and the flask was put to the oil bath pre-heated to 80 °C. The stirring was continued for 2 h at 80 °C and then the reaction mixture was poured over crushed ice. The mixture was extracted with dichloromethane (2x 20 mL), the combined organic layers were washed with saturated sodium bicarbonate solution (10 mL), dried over anhydrous magnesium sulfate. The solvent was evaporated *in vacuo* and the residue was purified by flash chromatography on silica gel (hexane-dichloromethane 2:1 to 1:3) to afford **4A** (20.8 mg, 14%) as an orange solid and **4F** (64.4 mg, 45%) as a red solid.

#### **14H-Naphtho[3,2,1-*gh*]heptahelicen-14-one 4A**

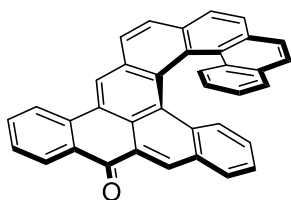

**M.p.:** 125 - 126 °C (CH<sub>3</sub>CN).

**Optical rotation:**  $[\alpha]^{20}_{\text{D}}$  +3493° (c 0.024, CH<sub>2</sub>Cl<sub>2</sub>);  $[\alpha]^{20}_{\text{D}}$  -3526° (c 0.021, CH<sub>2</sub>Cl<sub>2</sub>).

**<sup>1</sup>H NMR** (400 MHz, CDCl<sub>3</sub>): 6.34 (ddd, *J* = 8.4, 6.8, 1.4, 1H), 6.55 (ddd, *J* = 8.4, 6.9, 1.4, 1H), 6.89 (ddd, *J* = 8.0, 6.8, 1.2, 1H), 7.00 (ddd, *J* = 8.0, 6.8, 1.2, 1H), 7.14 (bd, *J* = 8.4, 1H), 7.23 (bd, *J* = 8.6, 1H), 7.30 (dd, *J* = 8.0, 1.3, 1H), 7.50 (d, *J* = 8.5, 1H), 7.57 (dd, *J* = 8.1, 1.3, 1H), 7.63 (td, *J* = 7.5, 1.1, 1H), 7.72 (d, *J* = 8.5, 1H), 7.85 (ddd, *J* = 8.4, 7.1, 1.5, 1H), 7.95 (d, *J* = 8.2, 1H), 8.00 (d, *J* = 8.3, 1H), 8.07 (d, *J* = 8.2, 1H), 8.12 (d, *J* = 8.2, 1H), 8.59 (t, *J* = 7.0, 1H), 8.60 (d, *J* = 7.8, 1H), 8.82 (s, 1H), 8.86 (s, 1H).

**<sup>13</sup>C NMR** (101 MHz, CDCl<sub>3</sub>): 123.9, 124.2, 124.3, 124.4, 124.7, 125.4 (3C), 125.6, 125.7, 126.0 (2C), 126.2, 126.6, 126.9, 127.0, 127.3, 127.8, 128.0, 128.39, 128.42, 128.5 (2C), 128.8, 129.1, 129.2, 130.8, 131.1, 131.3, 131.8, 131.9, 132.0, 132.1, 132.7, 133.9, 136.8, 184.5.

**IR** (CHCl<sub>3</sub>): 3053 w, 3027 w, 2957 w, 2928 vs, 2855 m, 1653 vs, 1610 m, 1601 m, 1583 m, 1554 w, 1522 w, 1498 w, 1486 w, 1465 vw, 1441 w, 1395 w, 1379 w, 1365 vw, 1330 w, 1280 m, 1265 m, 1261 m, 1249 w, 1172 w, 1148 w, 1117 w, 1083 w, sh, 1031 w, 982 w, 963 w, 883 w, 839 m, 829 w, 812 w, 700 w, 621 w, 609 m, 565 w, 541 w, 516 w, 472 w cm<sup>-1</sup>.

**APCI MS:** 481 ([M+H]<sup>+</sup>).

**HR APCI MS:** calcd for C<sub>37</sub>H<sub>21</sub>O 481.1587, found 481.1585.

**15H-Indeno[1,2-*i*]heptahelicen-15-one 4F**

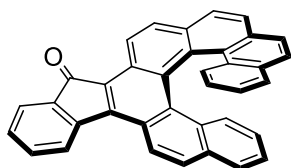

**M.p.:** 304 – 305 °C (CH<sub>3</sub>CN).

**<sup>1</sup>H NMR** (600 MHz, CD<sub>2</sub>Cl<sub>2</sub>): 6.43 (ddd, *J* = 8.3, 6.8, 1.4, 1H), 6.51 (ddd, *J* = 8.3, 6.8, 1.4, 1H), 6.959 (ddd, *J* = 8.0, 6.9, 1.2, 1H), 6.963 (ddd, *J* = 8.0, 6.9, 1.1, 1H), 7.09 (dq, *J* = 8.4, 0.8, 1H), 7.31 (ddt, *J* = 8.1, 1.2, 0.6, 1H), 7.32 (ddt, *J* = 8.1, 1.3, 0.6, 1H), 7.34 (dq, *J* = 8.5, 0.9, 1H), 7.41 (ddd, *J* = 7.7, 7.1, 0.8, 1H), 7.47 (dt, *J* = 8.4, 0.7, 1H), 7.60 (dt, *J* = 8.8, 0.7, 1H), 7.62 (td, *J* = 7.5, 1.3, 1H), 7.71 (d, *J* = 8.5, 1H), 7.75 (ddd, *J* = 7.1, 1.3, 0.6, 1H), 7.94 (dd, *J* = 8.1, 0.5, 1H), 8.00 (dd, *J* = 8.1, 0.5, 1H), 8.13 (dd, *J* = 8.4, 0.5, 1H), 8.21 (dq, *J* = 7.4, 0.7, 1H), 8.47 (d, *J* = 8.9, 1H), 9.35 (d, *J* = 8.4, 1H).

**<sup>13</sup>C NMR** (151 MHz, CD<sub>2</sub>Cl<sub>2</sub>): 121.6, 122.5, 124.0, 124.1, 124.48, 124.50, 124.7, 125.4, 126.0, 126.1, 126.2, 126.3, 126.6, 126.8, 126.9, 127.0, 127.2, 127.3, 127.8, 128.37, 128.42, 128.43, 128.8, 129.3, 129.73, 129.75, 129.9, 131.7, 132.2, 132.4, 132.8, 134.7, 135.2, 136.2, 144.2, 144.4, 195.8.

**IR** (CHCl<sub>3</sub>): 3051 w, 2956 w, 2928 w, 2856 w, 1702 vs, 1614 w, 1608 w, 1583 w, 1568 w, 1551 w, 1516 w, 1502 w, 1475 w, 1464 m, 1396 w, 1337 w, 1278 w, 1234 m, 1195 w, 1173 w, 1158 w, 1088 w, 1009 w, 994 w, 959 vw, 900 w, 884 vw, 846 s, 828 m, 806 w, 662 w, 648 w, 617 m, 565 w, 524 w, 471 vw cm<sup>-1</sup>.

**APCI MS:** 481 ([M+H]<sup>+</sup>).

**HR APCI MS:** calcd for C<sub>37</sub>H<sub>21</sub>O 481.1587, found 481.1582.

## Synthesis of compounds 5A and 5F

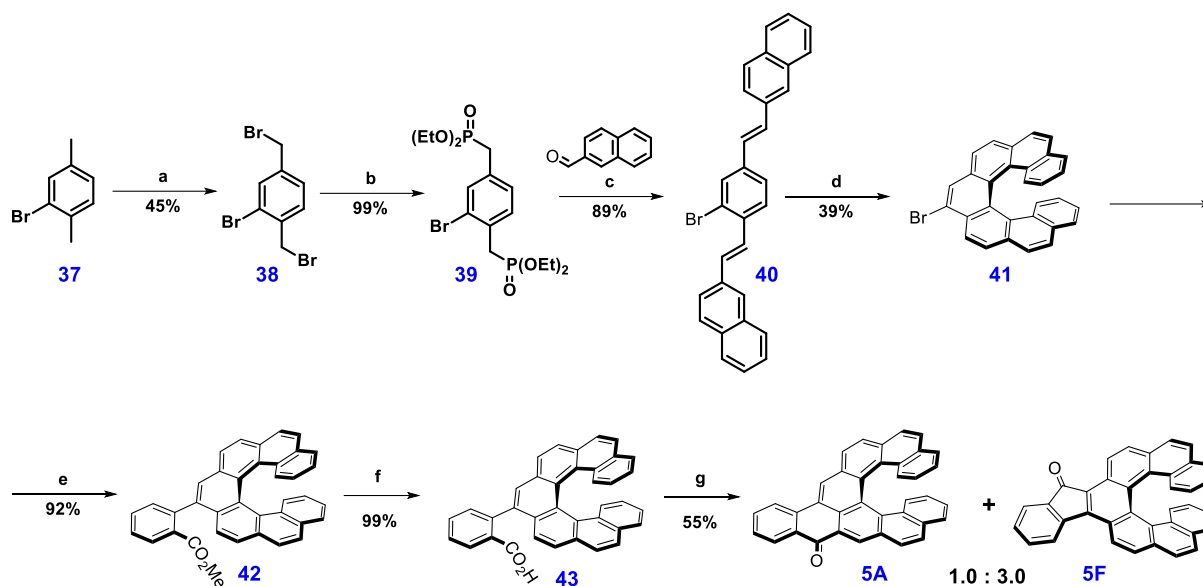

- (a) 2-Bromo-1,4-dimethylbenzene **37** (1.0 equiv.), NBS (2.02 equiv.), AIBN (cat.),  $\text{CHCl}_3$ , 62 °C, 4 h;  
(b) compound **38** (1.0 equiv.),  $\text{P}(\text{OEt})_3$  (2.01 equiv.), 120°C, 14 h;  
(c) compound **39** (1.0 equiv.), 2-naphthaldehyde (2.77 equiv.), NaH (4.19 equiv.), PhMe, 120 °C, 30 min;  
(d) stilbene **40** (1.0 equiv.),  $\text{I}_2$  (0.17 equiv.), PhMe:EtOAc (19:1), rt, 40 h;  
(e) helicene **41** (1.0 equiv.), 2-methoxycarbonylphenylboronic acid (1.5 equiv.),  $\text{Pd}_2\text{dba}_3$  (2 mol%), Xphos (4 mol%),  $\text{K}_3\text{PO}_4 \cdot \text{H}_2\text{O}$  (6.0 equiv.), PhMe, 90°C, 14 h;  
(f) ester **42** (1.0 equiv.), NaOH (5.0 equiv.), THF:MeOH:H<sub>2</sub>O (8:2:1), 70 °C, 16 h;  
(g)  $\text{MeSO}_3\text{H}$ , 80°C, 30 min.

### 2-Bromo-1,4-bis(bromoethyl)benzene 38

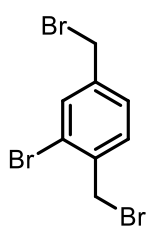

2-Bromo-1,4-dimethylbenzene **37** (6.0 mL, 44 mmol), NBS (15.82 g, 88.9 mmol, 2.02 eq.) and AIBN (60 mg, 0.365 mmol, 0.08 equiv.) were charged in a round bottom flask. Chloroform was added (200 mL) and the reaction was refluxed under inert for 4 h. The whole reaction mixture was filtered through a short silica gel pad (eluent chloroform) to remove polar succinimide. Organic solvent

was removed *in vacuo* and the residue was adsorbed on silica-gel and extracted by continuous extraction by hot pentane through Thiele-Pappe attachment. After 5 hours of extraction the product **38** as a white precipitate (6.8 g, 45%) was collected by filtration over a glass frit S3. <sup>1</sup>H NMR spectrum is in agreement with the published data.<sup>11</sup>

<sup>1</sup>H NMR (400 MHz,  $\text{CDCl}_3$ ): 4.41 (s, 2H), 4.58 (s, 2H), 7.32 (dd,  $J = 7.9, 1.8$ , 1H), 7.43 (d,  $J = 7.9, 1.8$ , 1H), 7.61 (d,  $J = 1.8$ , 1H).

<sup>11</sup> L. Pan, K-M. Lee, Y-Y. Chan, Z. Ke, Y-Y. Yeung *Org. Lett.* **2023**, 25, 53.



### Tetraethyl [(2-bromobenzene-1,4-diyl)dimethanediyl]bis(phosphonate) 39

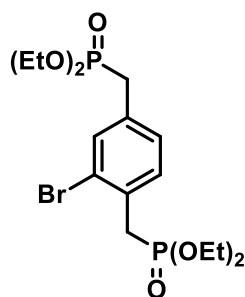

2-Bromo-1,4-bis(bromoethyl)benzene **38** (6.86 g, 20 mmol) and the triethylphosphite (6.9 mL, 40.2 mmol, 2.01 equiv.) were added in well dry round bottom flask and stirred overnight at 120°C under inert. The excess of triethylphosphite was removed *in vacuo* by heating the reaction mixture at 70°C for 4 h. The product **39** as a colorless oil (8.74 g, 99%) was used directly in the next step without any further purification. <sup>1</sup>H NMR spectrum is in agreement with the published data.<sup>12</sup>

<sup>1</sup>H NMR (400 MHz, CDCl<sub>3</sub>): 1.22 – 1.27 (m, 12H), 3.04 – 3.11 (m, 2H), 3.33 – 3.40 (m, 2H), 3.98 – 4.08 (m, 8H), 7.19 - 7.22 (m, 1H), 7.37 – 7.41 (m, 1H), 7.49 (bs, 1H).

### 2,2'-[(2-Bromobenzene-1,4-diyl)di(E)ethene-2,1-diyl]dinaphthalene 40

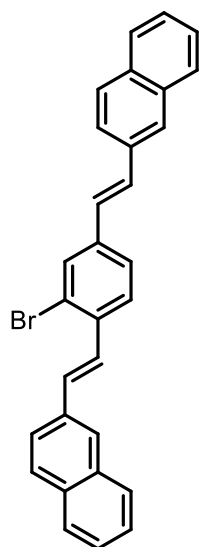

In a well dry round bottom flask were dissolved previous bisphosphate **39** (8.74 g, 19.1 mmol) and 2-naphthaldehyde (8.27 g, 53 mmol, 2.77 equiv.) in dry toluene (350 mL). To this mixture was added NaH (60%, dispersion in mineral oil, 3.2 g, 80 mmol, 4.19 equiv.) and the mixture was heated at 120 °C for 30 min under inert. The reaction mixture was cooled to room temperature and then slowly poured into a mixture of ice-water-37 % HCl (100 g -100 ml-100 ml). The organic phase with partially precipitated yellow product was separated and the water phase was extracted with toluene (3 x 100 mL). The organic portions were combined and the volume was reduced to its 20 % on rotavap. The product **40** as a yellow precipitate (7.8 g, 89%) was collected by filtration over a glass frit S3. <sup>1</sup>H NMR spectrum is in agreement with the published data.<sup>13</sup>

<sup>1</sup>H NMR (400 MHz, CD<sub>2</sub>Cl<sub>2</sub>): 7.21 (d, *J* = 16.3, 1H), 7.29 – 7.37 (m, 2H), 7.46 – 7.53 (m, 4H), 7.58 (dd, *J* = 8.0, 1.8, 1H), 7.64 (d, *J* = 16.3, 1H) 7.76 - 7.90 (m, 12H).

<sup>13</sup>C NMR (101 MHz, CD<sub>2</sub>Cl<sub>2</sub>): 123.9, 124.1, 125.1, 126.3, 126.76, 126.77, 127.0 (2C), 127.2, 127.5, 127.6, 127.7 (2C), 128.2 (2C), 128.60, 128.61, 129.0 (2C), 130.6, 131.5, 131.8, 133.8, 133.9, 134.2 (2C), 135.0, 135.1, 136.5, 139.0.

<sup>12</sup> Z.-P. Zhuang, M.-P. Kung, C. Hou, D. M. Skovronsky, T. L. Gur, K. Plössl, J. Q. Trojanowski, V. M.-Y. Lee, H. F. Kung, *J. Med. Chem.* **2001**, *44*, 1905.

<sup>13</sup> L Liu, B. Yang, T. J. Katz, M. K. Poindexter *J. Org. Chem.* **1991**, *56*, 3769.

### 9-Bromoheptahelicene 41

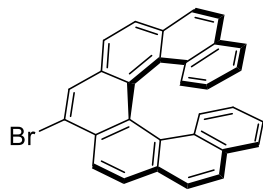

The previous stilbene **40** (3.2 g, 6.94 mmol) was suspended in toluene (400 mL). This mixture was heated to fully dissolve the starting material. When all the solid was dissolved, the mixture was diluted with toluene (1500 mL) and ethyl acetate (100 mL). Iodine (0.3 g, 1.18 mmol) was added to the mixture and the reaction mixture was irradiated with medium-pressure mercury (150 W) lamp for 40 h open to air. The whole reaction mixture was evaporated, and the residue was adsorbed on silica-gel. The product was isolated by continuous extraction with refluxing cyclohexane using Thiele-Pappe attachment. After evaporation of cyclohexane, the residue was triturated in diethyl ether and filtered over glass frit S4 to get slightly yellow product **41** (1.25 g, 39%). <sup>1</sup>H NMR spectrum is in agreement with the published data.<sup>14</sup>

<sup>1</sup>H NMR (400 MHz, CDCl<sub>3</sub>): 6.40 – 6.44 (m, 2H), 6.89 – 6.94 (m, 2H), 7.04 (d, *J* = 2.7, 1H), 7.06 (d, *J* = 2.9, 1H), 7.30 (d, *J* = 7.9, 2H), 7.48 – 7.52 (m, 2H), 7.69 – 7.52 (m, 2H), 7.90 (d, *J* = 8.2, 2H), 8.01 (d, *J* = 8.5, 1H), 8.34 (s, 1H), 8.45 (d, *J* = 8.5, 1H).

### Methyl 2-heptahelicen-9-ylbenzoate 42

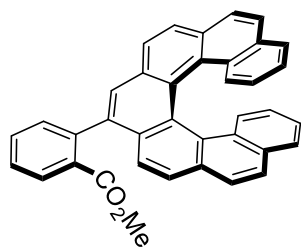

In a dry Schlenk flask was dissolved 9-bromo[7]helicene **41** (100 mg, 0.22 mmol), 2-methoxycarbonylphenylboronic acid (60 mg, 0.33 mmol, 1.5 equiv.), Pd<sub>2</sub>dba<sub>3</sub> (4 mg, 4.4 μmol, 2 mol%), Xphos (4.2 mg, 8.8 μmol, 4 mol%) and K<sub>3</sub>PO<sub>4</sub>·H<sub>2</sub>O (304 mg, 1.32 mmol, 6 equiv.) in dry toluene (6 mL). The reaction mixture was thoroughly degassed and then heated at 90 °C overnight. The solvent was evaporated *in vacuo* and the residue was purified by column chromatography on silica gel (cyclohexane-ethyl acetate 20:1). The product **42** was obtained as a yellow solid (104 mg, 92%). The <sup>1</sup>H NMR spectrum shows a mixture of two atropodiastereomers (1:1.7).

<sup>1</sup>H NMR (400 MHz, CD<sub>2</sub>Cl<sub>2</sub>): 3.24 and 3.35 (s, in ratio 1:1.7, 3H), 6.36 – 6.44 (m, 2H), 6.87 – 6.93 (m, 2H), 7.08 – 7.11 (m, 1H), 7.14 – 7.20 (m, 1H), 7.28 – 7.32 (m, 2H), 7.47 – 7.52 (m, 2H), 7.59 – 7.64 (m, 3H), 7.69 – 7.77 (m, 3H), 7.79 – 7.82 (m, 1H), 7.85 – 7.87 (m, 1H), 7.94 – 8.01 (m, 2H), 8.11 and 8.17 (m, in ratio 1:1.7, 1H).

<sup>14</sup> L Liu, B. Yang, T. J. Katz, M. K. Poindexter *J. Org. Chem.* **1991**, *56*, 3769.

<sup>13</sup>C NMR: Not recorded due to mixture of atropoisomers.

ESI MS: 535 ([M+Na]<sup>+</sup>).

HR ESI MS: calcd for C<sub>38</sub>H<sub>24</sub>O<sub>2</sub>Na 535.1669; found 535.1665.

### 2-Heptahelicen-9-ylbenzoic acid 43

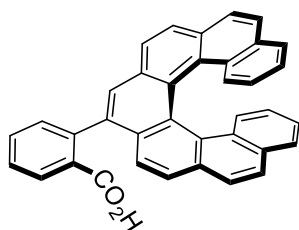

The previous compound **42** (104 mg, 0.203 mmol) and sodium hydroxide (41 mg, 1.01 mmol, 5 equiv.) was dissolved in a mixture of solvents of THF-methanol-water (4:1:0.5 mL). The mixture was stirred overnight at 70 °C under inert. Then the reaction was acidified by diluted hydrochloric acid and the mixture was extracted with dichloromethane (4 x 10 mL). The combined organic portions were dried over MgSO<sub>4</sub>. After filtration and evaporation of all the volatiles was obtained product **43** as an amorphous yellow solid (101 mg, yield 99%).

<sup>1</sup>H NMR (400 MHz, tetrachloroethane-*d*<sub>2</sub>, 110 °C): 6.39 – 6.46 (m, 2H), 6.88 – 6.95 (m, 2H), 7.12 – 7.20 (m, 2H), 7.29 – 7.32 (m, 2H), 7.47 – 7.52 (m, 2H), 7.57 – 7.80 (m, 7H), 7.85 – 7.87 (m, 1H), 7.94 (s, 2H), 8.12 and 8.16 (d, in ratio 1:1.3, 1H).

<sup>13</sup>C NMR: Not recorded due to mixture of atropoisomers.

ESI MS: 497 ([M-H]<sup>-</sup>).

HR ESI MS: calcd for C<sub>37</sub>H<sub>21</sub>O<sub>2</sub> 497.1547; found 497.1544.

### 14H-Naphtho[3,2,1-*jk*]heptahelicen-14-one 5A

### 19H-Indeno[1,2-*l*]heptahelicen-19-one 5F

The previous acid **43** (320 mg, 0.64 mmol) was suspended in methanesulfonic acid (12.4 mL) and the reaction was stirred at 80 °C for 30 min. Then, the reaction was poured in water and neutralized by potassium carbonate solution. The mixture was extracted with dichloromethane (4 x 20 mL). The organic phase was dried over MgSO<sub>4</sub>, filtered over the glass frit (S3) and evaporated *in vacuo*. The residue was chromatographed on silica gel (toluene). The first isolated product corresponds to the fluoreno-derivative **5F** and is red crystalline solid (126.8 mg, 41%) the second corresponds to the aceno-derivative **5A** and is an orange solid (42.3 mg, 14%). The combined yield (169 mg) is 55%.

### **14H-Naphtho[3,2,1-ik]heptahelicen-14-one 5A**

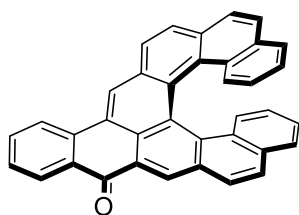

**M.p.:** 299 - 300 °C (CH<sub>3</sub>CN).

**Optical rotation:**  $[\alpha]^{20}_{\text{D}} +3620^{\circ}$  (c 0.026, CH<sub>2</sub>Cl<sub>2</sub>);  $[\alpha]^{20}_{\text{D}} -3672^{\circ}$  (c 0.025, CH<sub>2</sub>Cl<sub>2</sub>).

**<sup>1</sup>H NMR** (400 MHz, CDCl<sub>3</sub>): 6.44 – 6.51 (m, 2H), 6.93 – 6.99 (m, 2H), 7.21 (d, *J* = 8.5, 1H), 7.23 (d, *J* = 8.5, 1H), 7.31 (d, *J* = 3.8, 1H), 7.33 (d, *J* = 4.2, 1H), 7.51 (d, *J* = 8.5, 1H), 7.56 (d, *J* = 8.5, 1H), 7.61 – 7.64 (m, 1H), 7.72 (d, *J* = 8.5, 1H), 7.85 (ddd, *J* = 8.4, 7.1, 1.5, 1H), 7.92 (d, *J* = 8.5, 1H), 7.98 (d, *J* = 8.2, 1H), 8.11 (d, *J* = 8.3, 1H), 8.58 – 8.62 (m, 2H), 8.91 (s, 1H), 9.19 (s, 1H).

**<sup>13</sup>C NMR** (101 MHz, CDCl<sub>3</sub>): 123.8, 124.1, 124.2, 124.3, 124.5, 124.9, 125.5, 125.77, 125.79, 125.9, 126.3, 126.46, 126.52, 126.6, 126.7, 126.9, 127.0, 127.3, 128.2 (2C), 128.3, 128.4, 128.47, 128.49, 129.2, 129.7, 130.3, 130.98, 131.03, 131.8, 131.9, 132.0, 132.3, 133.2, 133.8, 136.7, 184.2.

**IR** (CHCl<sub>3</sub>): 3054 w, 2928 w, 2853 w, 1651 vs, 1602 s, 1585 vs, 1574 s, 1554 w, 1499 w, 1474 m, 1451 w, 1425 w, 1372 s, 1333 w, 1300 m, 1286 m, 1277 m, 1176 w, 1139 w, 1109 w, 1016 m, 952 w, 922 w, 885 w, 867 w, 833 s, 813 m, 698 w, 650 m, 642 m, 607 w, 522 w cm<sup>-1</sup>.

**ESI MS:** 481 ([M+H]<sup>+</sup>).

**HR ESI MS:** calcd for C<sub>37</sub>H<sub>21</sub>O 481.1587; found 481.1582.

### **19H-Indeno[1,2-*l*]heptahelicen-19-one 5F**

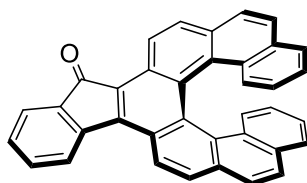

**M.p.:** 307 - 308 °C (CH<sub>3</sub>CN).

**<sup>1</sup>H NMR** (400 MHz, CDCl<sub>3</sub>): 6.44 – 6.49 (m, 2H), 6.90 – 6.95 (m, 2H), 7.02 (d, *J* = 13.6, 1H), 7.05 (d, *J* = 13.6, 1H), 7.27 (td, *J* = 1.5, 0.7, 1H), 7.29 (td, *J* = 1.4, 0.7, 1H), 7.37 (ddd, *J* = 7.8, 7.1, 0.8, 1H), 7.44 (d, *J* = 8.4, 1H), 7.51 (d, *J* = 8.4, 1H), 7.58 (td, *J* = 7.6, 1.3, 1H), 7.67 (d, *J* = 14.0, 1H), 7.69 (d, *J* = 14.0, 1H), 7.76 (ddd, *J* = 7.2, 1.3, 0.6, 1H), 7.99 (d, *J* = 8.4, 1H), 8.01 (d, *J* = 8.4, 1H), 8.18 (d, *J* = 7.5, 1H), 8.69 (d, *J* = 8.6, 1H), 9.33 (d, *J* = 8.5, 1H).

**<sup>13</sup>C NMR** (101 MHz, CDCl<sub>3</sub>): 122.62, 122.63, 123.5, 123.9, 124.2, 124.5, 124.7, 124.9, 125.1, 125.3, 125.4, 125.7, 125.9, 126.8, 126.88, 126.93, 127.4, 127.9, 128.0, 128.5 (2C), 128.9, 129.0, 129.2 (2C), 129.6, 130.0, 131.2, 131.5, 131.9, 132.0, 132.2, 134.3, 135.9, 143.4, 144.2, 195.7.

**IR** (CHCl<sub>3</sub>): 3053 w, 2929 w, 2856 w, 1700 vs, 1619 w, 1607 w, 1587 w, 1552 w, 1518 w, 1477 w, 1465 m, 1427 w, 1386 w, 1376 w, 1334 w, 1288 w, 1250 w, 1233 w, 1186 w, 1174 w, 1090 w, 1047 w, 1017 w, 954 w, 905 w, 842 m, 829 s, 656 w, 639 m, 618 m, 527 w, 471 w cm<sup>-1</sup>.

ESI MS: 481 ([M+H]<sup>+</sup>).

HR ESI MS: calcd for C<sub>37</sub>H<sub>21</sub>O 481.1587; found 481.1589.

### Synthesis of compounds 6A and 6F

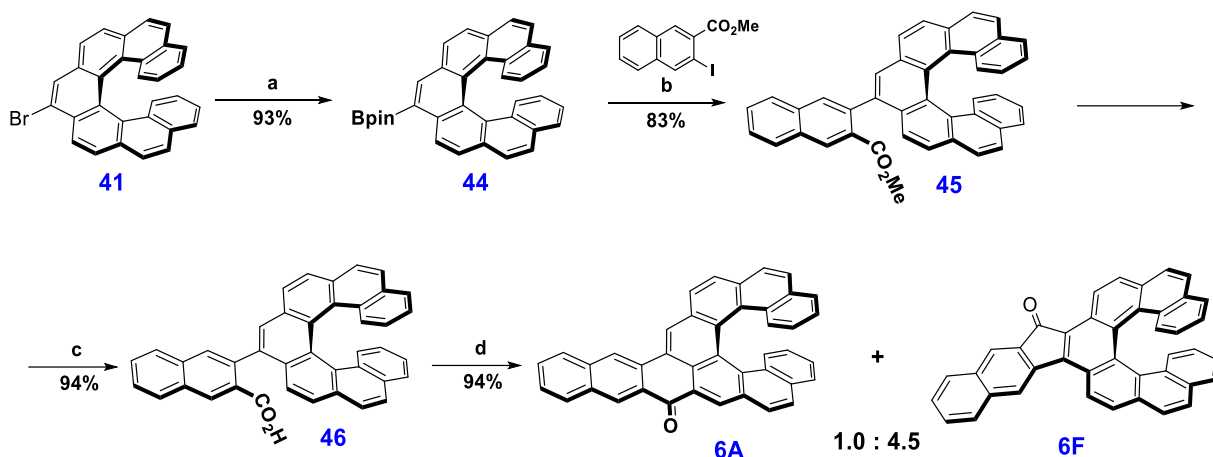

(a) helicene **41** (1.0 equiv.), B<sub>2</sub>pin<sub>2</sub> (1.5 equiv.), PdCl<sub>2</sub>(dppf) (4 mol%), KOAc (3.0 equiv.), dioxane, 70 °C, 24 h;

(b) methyl 3-iodo-2-naphthoate (1.0 equiv.), compound **44** (1.0 equiv.), Pd(PPh<sub>3</sub>)Cl<sub>2</sub> (4 mol%), K<sub>2</sub>CO<sub>3</sub> (1.0 equiv.), PhMe:EtOH:H<sub>2</sub>O (4:4:1), 90 °C, 16 h;

(c) ester **45** (1.0 equiv.), NaOH (5.0 equiv.), THF:MeOH:H<sub>2</sub>O (19:4.8:2.4), 70 °C, 16 h;

(d) MeSO<sub>3</sub>H, 80°C, 1h.

### 2-Heptahelicen-9-yl-4,4,5,5-tetramethyl-1,3,2-dioxaborolane 44

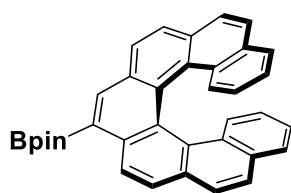

A Schlenk flask was charged with 9-bromo[7]helicene **41** (600 mg, 1.31 mmol), bis(pinacolato)diboron (500 mg, 1.97 mmol, 1.5 equiv.), PdCl<sub>2</sub>(dppf) (38.3 mg, 52.4 μmol, 4 mol%) and potassium acetate (386 mg, 3.93 mmol, 3 equiv.), flushed with argon and anhydrous dioxane (40 mL) was injected. The reaction mixture was degassed and then it was stirred under inert atmosphere at 70 °C for 1 day. After cooling to rt, the solvent was evaporated under the reduced pressure and the residue was purified by chromatography on silica gel (hexane-ethyl acetate 30:1 to 20:1) to afford product **44** (612 mg, 93%) as a yellow amorphous solid. <sup>1</sup>H NMR spectrum is in agreement with the published data.<sup>15</sup>

<sup>15</sup> M. Jakubec, I. Ghosh, J. Storch, B. König *Chem. Eur. J.* **2020**, *26*, 543.

$^1\text{H NMR}$  (400 MHz,  $\text{CD}_2\text{Cl}_2$ ): 1.53 (s, 12H), 6.38 – 6.43 (m, 2H), 6.87 – 6.93 (m, 2H), 7.03 – 7.08 (m, 2H), 7.26 – 7.32 (m, 2H), 7.47 (d,  $J = 6.5$ , 1H), 7.49 (d,  $J = 6.5$ , 1H), 7.70 – 7.75 (m, 2H), 7.92 (d,  $J = 8.1$ , 1H), 7.97 (d,  $J = 8.5$ , 1H), 8.05 (d,  $J = 8.3$ , 1H), 8.66 (s, 1H), 8.98 (d,  $J = 8.5$ , 1H).

### Methyl 3-heptahelicen-9-yl)naphthalene-2-carboxylate 45

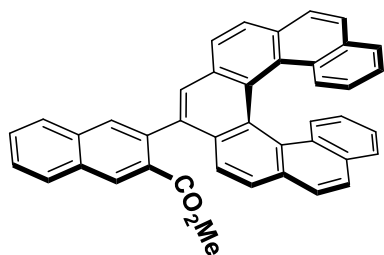

In a dry Schlenk flask was dissolved helicene **44** (474 mg, 0.94 mmol), methyl 3-iodo-2-naphthoate (293 mg, 0.94 mmol, 1.0 equiv.),  $\text{PdCl}_2(\text{PPh}_3)_2$  (26.4 mg, 37.6  $\mu\text{mol}$ , 4 mol%),  $\text{K}_2\text{CO}_3$  (130 mg, 0.94 mmol, 1 equiv.) and the mixture of solvents of toluene-ethanol-water (25.6 mL, 4:4:1). The reaction mixture was thoroughly degassed and then heated at 90 °C overnight. The solvent was evaporated *in vacuo* and the residue was purified by column chromatography on silica gel (cyclohexane- ethyl acetate 20:1). The product **45** was obtained as a yellow solid (439 mg, 83%). The  $^1\text{H NMR}$  spectrum shows mixture of two atropodiastereomers (1:1.8).

$^1\text{H NMR}$  (400 MHz,  $\text{CD}_2\text{Cl}_2$ ): 3.17 and 3.34 (s, in ratio 1:1.8, 3H), 6.39 – 6.49 (m, 2H), 6.90 – 6.96 (m, 2H), 7.09 – 7.25 (m, 2H), 7.29 – 7.35 (m, 2H), 7.48 – 7.53 (m, 2H), 7.63 – 7.72 (m, 4H), 7.73 – 7.80 (m, 2H), 7.92 – 8.05 (m, 4H), 8.08 – 8.14 (m, 2H), 8.68 and 8.75 (s, in ratio 1:1.8, 1H).

$^{13}\text{C NMR}$ : Not recorded due to mixture of atropoisomers.

**FD MS**: 562 ( $[\text{M}]^{+}$ ).

**HR MS FD**: calcd for  $\text{C}_{42}\text{H}_{26}\text{O}_2$  562.1927; found 562.1912.

### 3-Heptahelicen-9-yl)naphthalene-2-carboxylic acid 46

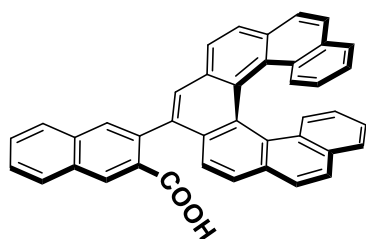

The previous compound **45** (550 mg, 0.977 mmol) and sodium hydroxide (195 mg, 4.88 mmol, 5 equiv.) was dissolved in a mixture of solvents of THF-methanol-water (19:4.8:2.4 mL). The mixture was stirred overnight at 70 °C under inert. Then the reaction was acidified by diluted hydrochloric acid and the mixture was extracted with dichloromethane (4 x 20 mL). The combined organic portions were dried over  $\text{MgSO}_4$ . After filtration and evaporation of all the volatiles was obtained product **46** as an amorphous yellow solid (504 mg, yield 94%).

**<sup>1</sup>H NMR** (400 MHz, tetrachloroethane-*d*<sub>2</sub>, 110 °C): 6.47 – 6.52 (m, 2H), 6.93 – 7.00 (m, 2H), 7.19 – 7.23 (m, 1H), 7.25 – 7.30 (m, 1H), 7.33 – 7.38 (m, 2H), 7.52 – 7.58 (m, 2H), 7.69 – 7.87 (m, 6H), 7.98 – 8.09 (m, 4H), 8.14 – 8.20 (m, 2H), 8.80 and 8.85 (s, in ratio 1:1.6, 1H).

**<sup>13</sup>C NMR**: Not recorded due to mixture of atropoisomers.

**FD MS**: 548 ([M]<sup>++</sup>).

**HR MS FD**: calcd for C<sub>41</sub>H<sub>24</sub>O<sub>2</sub> 548.1771; found 548.1797.

#### **14H-Anthra[3,2,1-*jk*]heptahelicen-14-one 6A**

#### **21H-Benzo[5,6]indeno[1,2-*l*]heptahelicen-21-one 6F**

The previous acid **46** (300 mg, 0.547 mmol) was suspended in methanesulfonic acid (12 mL) and the reaction was stirred at 80 °C for 1 hour. Then, the reaction was poured into water where brown solid was formed. The solid was collected by filtration over glass frit S4 and washed with water and then with methanol and dried. This solid was chromatographed on silica gel (toluene). The first isolated product corresponds to the fluoreno-derivative **6F** and is red crystalline solid (192 mg, 66%) the compound corresponds to the aceno-derivative **6A** and is an orange solid (80 mg, 28%). The combined yield (272 mg) is 94%.

#### **14H-Anthra[3,2,1-*jk*]heptahelicen-14-one 6A**

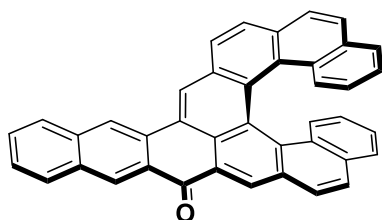

**M.p.**: 279 - 280 °C (CH<sub>3</sub>CN).

**Optical rotation**: [α]<sup>20</sup><sub>D</sub> +2014° (c 0.029, CH<sub>2</sub>Cl<sub>2</sub>); [α]<sup>20</sup><sub>D</sub> -1945° (c 0.020, CH<sub>2</sub>Cl<sub>2</sub>).

**<sup>1</sup>H NMR** (600 MHz, tetrachloroethane-*d*<sub>2</sub>): 6.50 (ddd, *J* = 8.3, 6.8, 1.3, 1H), 6.53 (ddd, *J* = 8.3, 6.8, 1.3, 1H), 6.98 (ddd, *J* = 7.9, 6.8, 1.1, 1H), 7.01 (ddd, *J* = 8.0, 6.8, 1.1, 1H), 7.22 (d, *J* = 8.5, 1H), 7.24 (d, *J* = 8.4, 1H), 7.34 – 7.36 (m, 2H), 7.54 (d, *J* = 8.4, 1H), 7.59 (d, *J* = 8.4, 1H), 7.64 (ddd, *J* = 8.1, 6.7, 1.1, 1H), 7.73 (ddd, *J* = 7.9, 6.7, 1.2, 1H), 7.76 (d, *J* = 8.5, 1H), 7.95 (d, *J* = 8.5, 1H), 8.04 (d, *J* = 8.2, 1H), 8.15 – 8.16 (m, 2H), 8.20 (d, *J* = 8.2, 1H), 9.06 (s, 1H), 9.09 (s, 1H), 9.15 (s, 1H), 9.20 (s, 1H).

**<sup>13</sup>C NMR** (151 MHz, tetrachloroethane-*d*<sub>2</sub>): 123.1, 123.6 (2C), 124.1, 124.2, 124.9, 125.2, 125.3, 125.59, 125.61, 125.7, 126.2, 126.7, 126.8, 126.9, 127.1 (2C), 127.8, 128.0, 128.3, 128.4, 128.50, 128.52, 128.8, 129.0, 129.1, 129.7, 129.8, 129.9, 130.4, 131.5, 131.7 (2C), 132.0, 132.2, 132.3, 132.8, 135.9, 184.2.

**IR** (KBr): 3048 w, 2968 w, 2924 w, 2853 w, 1659 vs, 1623 m, 1587 m, 1572 w, 1553 w, 1502 w, 1489 w, 1478 w, 1464 w, 1445 w, 1424 w, 1373 m, 1364 w, 1355 w, 1337 w, 1285 m, 1274 m,

1208 w, 1190 s, 1166 w, 1111 w, 1027 w, 921 w, 881 w, 830 m, 808 m, 745 s, 681 w, 608 w, 518 w, 475 w  $\text{cm}^{-1}$ .

**FD MS:** 530 ( $[\text{M}]^{+}$ ).

**HR MS FD:** calcd for  $\text{C}_{41}\text{H}_{22}\text{O}$  530.1665; found 530.1673.

**21H-Benzo[5,6]indeno[1,2-]heptahelicen-21-one 6F**

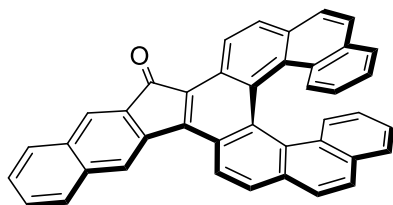

**M.p.:** > 325 °C ( $\text{CH}_3\text{CN}$ ).

**Optical rotation:**  $[\alpha]^{20}_{\text{D}} +434^\circ$  (c 0.025,  $\text{CH}_2\text{Cl}_2$ );  $[\alpha]^{20}_{\text{D}} -391^\circ$  (c 0.032,  $\text{CH}_2\text{Cl}_2$ ).

**$^1\text{H NMR}$**  (600 MHz, tetrachloroethane- $d_2$ ): 6.49 – 6.52 (m, 2H), 6.94 – 6.97 (m, 2H), 7.02 – 7.04 (m, 2H), 7.30 – 7.32 (m, 2H), 7.47 (d,  $J = 8.1$ , 1H), 7.54 – 7.57 (m, 2H), 7.64 (ddd,  $J = 8.1, 6.9, 1.3$ , 1H), 7.69 (d,  $J = 8.4$ , 1H), 7.75 (d,  $J = 8.5$ , 1H), 7.96 (d,  $J = 7.9$ , 1H), 8.02 (d,  $J = 8.0$ , 1H), 8.05 (d,  $J = 8.5$ , 1H), 8.12 (d,  $J = 8.5$ , 1H), 8.22 (s, 1H), 8.51 (s, 1H), 8.88 (d,  $J = 8.5$ , 1H), 9.43 (d,  $J = 8.4$ , 1H).

**$^{13}\text{C NMR}$**  (151 MHz, tetrachloroethane- $d_2$ ): 122.3, 122.6, 122.9, 124.1, 124.2, 124.3, 124.4, 124.6, 125.1 (2C), 125.36, 125.40, 126.63, 126.65, 126.7, 127.3, 127.46, 127.54, 127.9, 128.2, 128.5 (2C), 128.6, 128.8, 129.0, 129.16, 129.19, 129.4, 129.8, 130.4, 131.1, 131.3, 131.57, 131.59, 132.2, 133.1, 134.4, 136.7, 138.1, 143.6, 194.2.

**IR** (KBr): 3047 w, 2925 w, 2853 w, 1692 vs, 1629 s, 1604 w, 1593 w, 1551 w, 1512 m, 1495 w, 1474 w, 1439 w, 1421 w, 1353 w, 1337 w, 1291 w, 1267 w, 1250 m, 1239 w, 1203 w, 1180 w, 1151 w, 1142 w, 1119 w, 1106 w, 1059 w, 1024 w, 909 m, 876 w, 841 m, 828 m, 789 w, 744 s, 626 m, 606 w, 526 w, 473 m  $\text{cm}^{-1}$ .

**FD MS:** 530 ( $[\text{M}]^{+}$ ).

**HR MS FD:** calcd for  $\text{C}_{41}\text{H}_{22}\text{O}$  530.1665; found 530.1677.



## Synthesis of compounds 7A and 7F

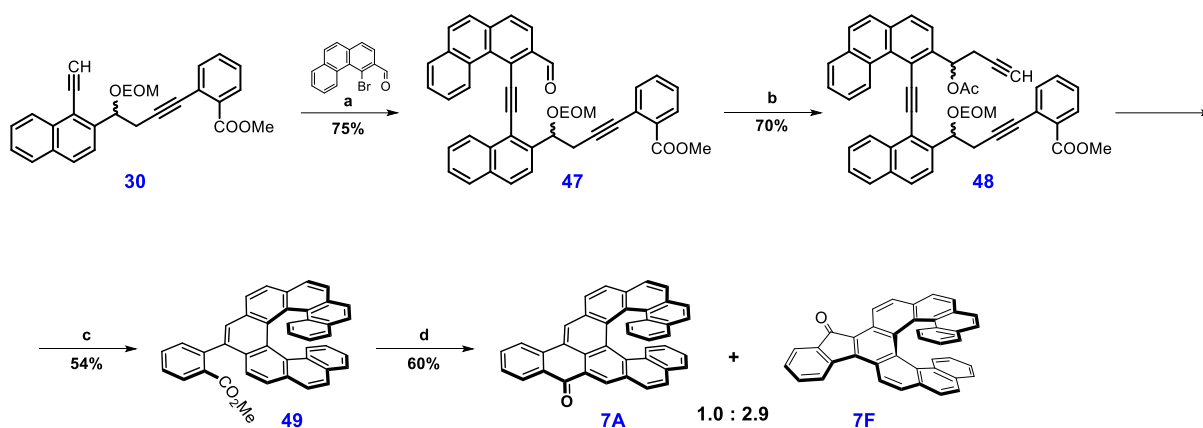

(a) 4-Bromophenanthrene-3-carbaldehyde (1.0 equiv.), diene **22** (1.1 equiv.), Pd(PPh<sub>3</sub>)Cl<sub>2</sub> (2 mol%), CuI (4 mol%), THF:Et<sub>3</sub>N (3:2), 50 °C, 3 h.;

(b) Zn (2.0 equiv.), propargyl bromide (2.0 equiv.), compound **37** (1.0 equiv.), THF, rt, 15 min. then Et<sub>3</sub>N (3.0 equiv.), Ac<sub>2</sub>O (3.0 equiv.), THF, rt, 3 h.;

(c) triyne **38** (1.0 equiv.), CpCo(CO)(fum) (0.7 equiv.), PhCl, 180 °C, 20 min. then *p*-TsOH.H<sub>2</sub>O (5.0 equiv.), 95 °C, 1h;

(d) ester **39** (1.0 equiv.), KOH (10.0 equiv.), THF:MeOH (1:1), 65 °C, 5 h. then MeSO<sub>3</sub>H, 80°C, 2h.

## Methyl 2-[4-(ethoxymethoxy)-4-{1-[(3-formylphenanthren-4-yl)ethynyl]naphthalen-2-yl}but-1-yn-1-yl]benzoate 47

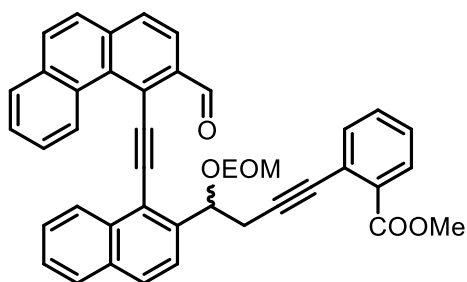

A Schlenk flask was charged with 4-bromophenanthrene-3-carbaldehyde (442 mg, 1.55 mmol), bis(triphenylphosphine)palladium chloride (21.7 mg, 0.03 mmol, 2 mol%), copper(I) iodide (11.8 mg, 0.06 mmol, 4 mol%) and flushed with argon. The degassed tetrahydrofuran (20 mL) and degassed triethylamine (20 mL) were added and the mixture was heated to 50 °C. Then diene **30** (700 mg, 1.70 mmol, 1.1 equiv.) in degassed tetrahydrofuran (10 mL) was slowly added and the reaction was stirred at 50 °C for 3 hours. The solvents were evaporated under the reduced pressure. The residue was chromatographed on silica gel (hexane-ethyl acetate 20:1 to 10:1) to afford the desired product **47** (716 mg, 75%).

<sup>1</sup>H NMR (400 MHz, CDCl<sub>3</sub>): 1.01 (t, *J* = 7.1, 3H), 3.15 (dd, *J* = 17.2, 6.3, 1H), 3.21 (dd, *J* = 17.2, 6.9, 1H), 3.50 (dq, *J* = 9.5, 7.1, 1H), 3.63 (s, 3H), 3.74 (dq, *J* = 9.5, 7.1, 1H), 4.73 (d, *J* = 6.9, 1H), 4.85 (d, *J* = 6.9, 1H), 5.85 (t, *J* = 6.4, 1H), 7.18 – 7.27 (m, 3H), 7.52 – 7.59 (m, 3H), 7.62 (ddd, *J*

= 8.0, 7.0, 1.2, 1H), 7.74 – 7.78 (m, 2H), 7.87 (d,  $J = 8.6$ , 1H), 7.89 – 7.94 (m, 3H), 7.98 (d,  $J = 8.5$ , 1H), 8.00 (d,  $J = 8.4$ , 1H), 8.19 (d,  $J = 8.2$ , 1H), 8.51 – 8.54 (m, 1H), 10.39 – 10.43 (m, 1H), 11.19 (d,  $J = 0.9$ , 1H).

$^{13}\text{C}$  NMR (101 MHz,  $\text{CDCl}_3$ ): 15.0, 28.9, 51.9, 63.8, 75.0, 81.4, 91.5, 93.7, 96.8, 99.4, 118.6, 123.9, 124.0, 124.1, 124.2, 126.5, 126.8, 126.9, 127.0, 127.1, 127.4, 127.6, 127.7, 128.5, 128.9, 130.0, 130.07, 130.14, 130.4, 131.0, 131.1, 131.4, 131.9, 133.0, 133.37, 133.44, 134.4, 136.73, 136.74, 142.5, 166.7, 192.9.

IR ( $\text{CHCl}_3$ ): 3061 w, 2978 w, 2953 w, 2931 w, 2884 w, 2233 w, 2187 w, 1728 s, 1699 m, 1682 vs, 1629 w, 1599 w, sh, 1588 m, 1568 w, 1509 w, 1468 w, sh, 1449 w, 1435 m, 1394 m, 1300 m, 1276 m, 1257 vs, 1147 m, 1131 m, 1097 m, 1043 m, sh, 1029 s, 965 w, 868 w, 850 m, 825 w, 636 w, 576 vw, 541 w, 522 w  $\text{cm}^{-1}$ .

ESI MS: 639 ( $[\text{M}+\text{Na}]^+$ ).

HR ESI MS: calcd for  $\text{C}_{42}\text{H}_{32}\text{O}_5\text{Na}$  639.2142, found 639.2140.

**Methyl 2-{4-[1-({3-[1-(acetyloxy)but-3-yn-1-yl]phenanthren-4-yl)ethynyl]naphthalen-2-yl]-4-(ethoxymethoxy)but-1-yn-1-yl}benzoate 48**

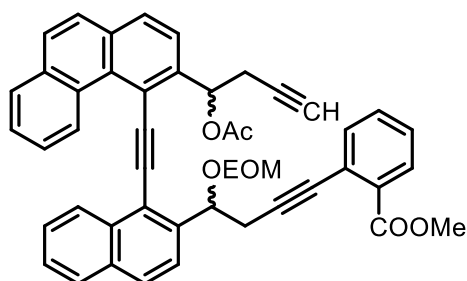

A Schlenk flask was filled with zinc powder (143 mg, 2.18 mmol, 2 equiv.) and flushed with argon. Freshly distilled tetrahydrofuran (6 mL) was added and vigorously stirred. Then propargyl bromide (80 wt. % in toluene, 243  $\mu\text{L}$ , 2.18 mmol, 2 equiv.) was added and stirred for 10 min, before it was transferred by a syringe to the second Schlenk flask, which contained aldehyde **47** (673 mg, 1.09 mmol) and tetrahydrofuran (40 mL). The reaction mixture was stirred for 5 min at room temperature, before triethylamine (449  $\mu\text{L}$ , 3.27 mmol, 3 equiv.) and acetic anhydride (309  $\mu\text{L}$ , 3.27 mmol, 3 equiv.) were added and the solution was stirred for 3 h at room temperature. The solvents were evaporated under the reduced pressure and the residue was purified by flash chromatography on silica gel (hexane-ethyl acetate 10:1) to obtain acetate **48** (532 mg, 70%) as a mixture of diastereomers in a ratio about 1:1.

$^1\text{H}$  NMR (400 MHz,  $\text{CDCl}_3$ , mixture of diastereomers): 0.93 (t,  $J = 7.1$ , 3H), 0.96 (t,  $J = 7.1$ , 3H), 1.99 (t,  $J = 2.6$ , 1H), 2.00 (t,  $J = 2.6$ , 1H), 2.14 (s, 3H), 2.15 (s, 3H), 2.93 – 3.11 (m, 4H), 3.17 – 3.24 (m, 4H), 3.42 – 3.54 (m, 2H), 3.63 (s, 3H), 3.63 – 3.72 (m, 2H), 3.66 (s, 3H), 4.76 (d,  $J = 6.8$ ,

1H), 4.79 (d,  $J = 6.8$ , 1H), 4.84 (d,  $J = 6.8$ , 1H), 4.89 (d,  $J = 6.8$ , 1H), 5.88 (t,  $J = 6.1$ , 1H), 5.89 (t,  $J = 6.1$ , 1H), 7.027 (t,  $J = 5.9$ , 1H), 7.031 (t,  $J = 5.9$ , 1H), 7.19 – 7.32 (m, 6H), 7.43 – 7.51 (m, 2H), 7.52 – 7.59 (m, 6H), 7.73 (d,  $J = 8.8$ , 2H), 7.77 – 7.81 (m, 4H), 7.836 (d,  $J = 8.3$ , 1H), 7.840 (d,  $J = 8.3$ , 1H), 7.86 – 7.93 (m, 6H), 7.94 – 7.99 (m, 4H), 8.63 – 8.70 (m, 2H), 10.39 (bd,  $J = 8.5$ , 2H).

$^{13}\text{C}$  NMR (101 MHz,  $\text{CDCl}_3$ , mixture of diastereomers): 14.96, 15.01, 21.18, 21.20, 26.0, 26.1, 28.8, 29.0, 51.9, 52.0, 63.7, 63.8, 71.4 (2C), 71.9, 72.0, 75.0, 75.5, 79.5 (2C), 81.17, 81.22, 92.14, 92.15, 94.1, 94.2, 97.2, 97.4, 98.3, 98.5, 117.1, 117.2, 118.7, 118.9, 123.8 (2C), 124.19, 124.22, 124.3 (2C), 126.4, 126.5, 126.7 (2C), 126.8, 126.9, 127.02, 127.04, 127.1 (2C), 127.2, 127.28 (2C), 127.31, 127.39, 127.41, 128.3 (2C), 128.48 (2C), 128.53 (2C), 129.4 (2C), 130.0 (2C), 130.1 (2C), 130.3 (2C), 130.8 (2C), 131.42, 131.44, 131.97, 131.99, 132.8 (2C), 133.0 (2C), 133.4 (2C), 133.5 (2C), 134.5 (2C), 142.1, 142.2, 142.4, 142.5, 166.87, 166.88, 169.7, 169.8.

IR ( $\text{CHCl}_3$ ): 3309 m, 3058 w, 2977 w, 2953 m, 2930 m, 2886 w, 2233 w, 2192 vw, 2124 vw, 1733 vs, 1712 s, sh, 1624 w, 1597 w, 1568 w, 1503 w, 1486 m, 1469 w, sh, 1449 m, 1435 m, 1372 m, 1300 m, 1277 m, 1253 s, sh, 1239 vs, 1164 w, 1146 m, 1131 w, 1097 m, 1043 vs, 1028 s, 966 w, 868 w, 845 m, 824 w, 640 w, 539 w  $\text{cm}^{-1}$ .

ESI MS: 721 ( $[\text{M}+\text{Na}]^+$ ).

HR ESI MS: calculated for  $\text{C}_{47}\text{H}_{38}\text{O}_6\text{Na}$  721.2561, found 721.2560.

### Methyl 2-octahelicene-9ylbenzoate 49

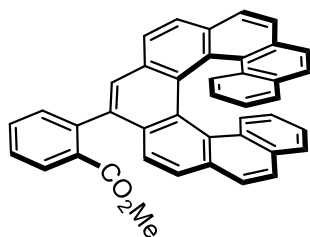

Triyne **48** (506 mg, 0.72 mmol) was loaded to a microwave vial and chlorobenzene (18 mL) was added. The solution was bubbled with nitrogen for 5 minutes before  $\text{CpCo}(\text{CO})(\text{fum})$  (149 mg, 0.50 mmol, 0.7 equiv, fum = dimethylfumarate) was added. The seal was closed and the reaction mixture was heated to 180 °C in the microwave reactor for 20 minutes. *p*-Toluenesulfonic acid monohydrate (684 mg, 3.60 mmol, 5 equiv.) was added and the reaction mixture was stirred for 1 h at 95 °C. The solvent was evaporated in vacuum. The residue was purified by flash chromatography on silica gel (hexane-ethyl acetate 20:1 to 10:1) to obtain helicene **49** (218 mg, 54%) as a mixture of two atropodiastereomers in a ratio 3.3:1.

$^1\text{H}$  NMR (400 MHz,  $\text{CDCl}_3$ , major atropodiastereomer): 3.67 (s, 3H), 6.39 – 6.45 (m, 1H), 6.49 (ddd,  $J = 8.3, 6.8, 1.4$ , 1H), 6.95 – 7.06 (m, 4H), 7.07 – 7.20 (m, 4H), 7.26 – 7.33 (m, 3H), 7.37

(d,  $J = 8.7$ , 1H), 7.407 (d,  $J = 8.4$ , 1H), 7.413 (d,  $J = 8.2$ , 1H), 7.57 (dd,  $J = 7.4$ , 1.5, 1H), 7.60 – 7.65 (m, 1H), 7.79 (d,  $J = 8.2$ , 1H), 7.84 (s, 1H), 7.96 – 8.03 (m, 2H), 8.22 (dd,  $J = 7.9$ , 1.5, 1H).

$^{13}\text{C}$  NMR (101 MHz,  $\text{CDCl}_3$ , major atropodiastereomer): 52.1, 123.85, 123.87, 124.0 (2C), 124.5 (2C), 125.1, 125.3, 125.7, 125.8, 125.9, 126.3, 126.4, 126.69 (2C), 126.74 (2C), 126.76, 126.8, 126.9, 127.0, 127.4, 127.8, 127.9, 127.96, 128.01, 128.1, 130.1, 130.51, 130.53, 130.9, 131.4, 131.7, 131.76, 131.82, 132.0, 132.2, 132.3, 139.1, 141.6, 167.9.

IR ( $\text{CHCl}_3$ ): 3053 w, 2953 w, 1724 s, 1618 vw, 1597 vw, 1570 vw, 1506 vw, 1485 w, 1465 vw, 1447 w, 1434 w, 1393 w, 1293 s, 1272 m, 1258 s, 1236 m, 1190 m, sh, 1164 w, 1132 w, sh, 1099 w, 1077 w, 1043 w, 963 w, sh, 881 w, 834 vs, 810 vw, 692 w, 644 vw, 608 w, 599 w, 587 w, 552 w, 525 w  $\text{cm}^{-1}$ .

ESI MS: 585 ( $[\text{M}+\text{Na}]^+$ ).

HR ESI MS: calculated for  $\text{C}_{42}\text{H}_{26}\text{O}_2\text{Na}$  585.1825, found 585.1824.

#### **16H-Naphtho[3,2,1-*jk*]octahelicen-16-one 7A**

#### **17H-Indeno[1,2-*l*]octahelicen-17-one 7F**

Ester **49** (182 mg, 0.32 mmol) was dissolved in tetrahydrofuran (10 mL) and methanol (10 mL), and potassium hydroxide (180 mg, 3.20 mmol, 10 equiv.) was added. The mixture was heated to 65 °C and stirred for 5 h. Then the reaction was cooled to rt and diluted hydrochloric acid was added to reach pH 1. The mixture was extracted with diethyl ether (2x 20 mL), and the combined organic layers were dried over anhydrous magnesium sulfate. The solvents were evaporated under the reduced pressure to obtain crude carboxylic acid, which was directly used further. This acid was dissolved in methanesulfonic acid (10 mL) and the flask was put to the oil bath pre-heated to 80 °C. The stirring was continued for 2 h at 80 °C and then the reaction mixture was poured over crushed ice. The mixture was extracted with dichloromethane (2x 20 mL), the combined organic layers were washed with saturated sodium bicarbonate solution (10 mL), dried over anhydrous magnesium sulfate. The solvent was evaporated *in vacuo* and the residue was purified by flash chromatography on silica gel (hexane-dichloromethane 2:1 to 1:3) to afford **7A** (26.3 mg, 15%) as an orange solid and **7F** (76.5 mg, 45%) as a red solid.

#### **16H-Naphtho[3,2,1-*jk*]octahelicen-16-one 7A**

M.p.: > 315 °C ( $\text{CH}_3\text{CN}$ ).

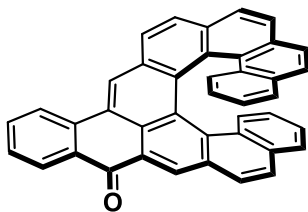

**Optical rotation:**  $[\alpha]^{20}_{\text{D}} +4789^{\circ}$  (c 0.026,  $\text{CH}_2\text{Cl}_2$ );  $[\alpha]^{20}_{\text{D}} -4633^{\circ}$  (c 0.025,  $\text{CH}_2\text{Cl}_2$ ).

**$^1\text{H NMR}$**  (400 MHz,  $\text{CDCl}_3$ ): 6.37 (ddd,  $J = 8.4, 6.8, 1.4$ , 1H), 6.49 (ddd,  $J = 8.4, 6.9, 1.4$ , 1H), 6.99 (ddd,  $J = 8.0, 6.8, 1.2$ , 1H), 7.04 (ddd,  $J = 8.0, 6.8, 1.1$ , 1H), 7.05 – 7.10 (m, 3H), 7.19 (d,  $J = 8.5$ , 1H), 7.21 (d,  $J = 8.5$ , 1H), 7.23 (d,  $J = 7.9$ , 1H), 7.33 (dt,  $J = 8.0, 1.7$ , 2H), 7.42 (d,  $J = 8.2$ , 1H), 7.64 (ddd,  $J = 8.0, 7.1, 1.1$ , 1H), 7.77 (d,  $J = 8.2$ , 1H), 7.86 (ddd,  $J = 8.2, 7.1, 1.5$ , 1H), 8.02 (d,  $J = 8.2$ , 1H), 8.11 (d,  $J = 8.3$ , 1H), 8.61 (dd,  $J = 7.9, 1.5$ , 1H), 8.62 (dd,  $J = 7.9, 1.0$ , 1H), 8.67 (s, 1H), 8.89 (s, 1H).

**$^{13}\text{C NMR}$**  (101 MHz,  $\text{CDCl}_3$ ): 123.7, 123.9, 124.4, 124.5, 124.6, 125.0, 125.1, 125.23, 125.25, 125.5, 125.9, 126.0, 126.1, 126.3, 126.4, 126.6, 126.99, 127.04, 127.10, 127.13, 127.5, 127.6, 127.7, 127.8, 128.0, 128.1, 128.36, 128.40, 128.5, 130.3, 130.6, 130.7, 131.1, 131.2, 131.8, 132.3, 132.9, 133.1, 133.7, 136.8, 184.1.

**IR** ( $\text{CHCl}_3$ ): 3045 w, 2958 w, 2928 w, 2856 w, 1648 vs, 1601 s, 1581 vs, 1752 m, 1553 w, 1487 m, 1466 w, 1424 w, 1372 s, 1333 w, 1300 m, 1284 s, 1271 m, 1260 w, 1175 w, 1168 w, 1128 w, 1070 vw, 1008 w, 962 vw, 919 w, 883 w, sh, 838 s, 811 m, 699 w, 685 w, 624 m, 603 w, 593 vw, 552 w, 520 w, 476 vw  $\text{cm}^{-1}$ .

**APCI MS:** 531 ( $[\text{M}+\text{H}]^+$ ).

**HR APCI MS:** calcd for  $\text{C}_{41}\text{H}_{23}\text{O}$  531.1743, found 531.1736.

#### **17H-Indeno[1,2-f]octahelicen-17-one 7F**

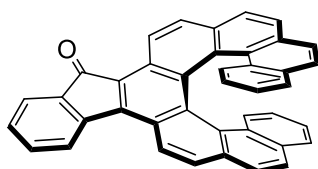

**M.p.:** > 315  $^{\circ}\text{C}$  ( $\text{CH}_3\text{CN}$ ).

**$^1\text{H NMR}$**  (600 MHz,  $\text{CD}_2\text{Cl}_2$ ): 6.47 (ddd,  $J = 8.3, 6.8, 1.4$ , 1H), 6.52 (ddd,  $J = 8.3, 6.7, 1.4$ , 1H), 6.95 (dt,  $J = 8.4, 1.0$ , 1H), 7.00 (ddd,  $J = 7.9, 6.7, 1.2$ , 1H), 7.04 (ddd,  $J = 7.9, 6.7, 1.2$ , 1H), 7.06 (d,  $J = 8.3$ , 1H), 7.07 (d,  $J = 8.3$ , 1H), 7.18 (d,  $J = 8.4$ , 1H), 7.21 (d,  $J = 8.5$ , 1H), 7.27 (dt,  $J = 8.4, 0.9$ , 1H), 7.32 (ddt,  $J = 7.9, 1.4, 0.8$ , 1H), 7.35 (ddt,  $J = 8.0, 1.4, 0.7$ , 1H), 7.37 (d,  $J = 8.1$ , 1H), 7.41 (td,  $J = 7.6, 0.8$ , 1H), 7.52 (d,  $J = 8.5$ , 1H), 7.62 (td,  $J = 7.5, 1.3$ , 1H), 7.75 (d,  $J = 8.1$ , 1H), 7.77 (ddt,  $J = 7.1, 1.3, 0.6$ , 1H), 8.07 (d,  $J = 8.4$ , 1H), 8.21 (dq,  $J = 7.5, 0.6$ , 1H), 8.53 (d,  $J = 8.5$ , 1H), 9.31 (d,  $J = 8.4$ , 1H).

**$^{13}\text{C NMR}$**  (151 MHz,  $\text{CD}_2\text{Cl}_2$ ): 122.5, 122.6, 123.7, 123.9 (2C), 124.1, 124.8, 124.99, 125.00, 125.03, 125.3, 125.6, 126.20, 126.23, 126.6, 127.14, 127.15, 127.2, 127.3, 127.9, 127.98, 128.01, 128.2, 128.4, 128.5 (2C), 128.6, 128.8, 129.3, 129.9, 131.3, 132.1, 132.2, 132.3, 132.4, 132.9, 134.7, 136.2, 144.0, 144.6, 195.8.

IR (CHCl<sub>3</sub>): 3044 w, 3014 w, 2953 w, 2920 w, 2851 w, 1695 s, 1606 w, 1590 w, 1582 w, 1562 w, 1515 w, 1463 w, 1431 vw, 1375 vw, 1329 vw, 1275 w, 1240 w, 1230 vw, 1192 vw, 1171 w, 1087 w, 1044 w, 1005 w, 943 w, 892 w, 860 w, 839 m, 823 vs, 689 w, 610 m, 602 w, 590 w, 553 w, 536 w, 524 m, 476 w cm<sup>-1</sup>.

APCI MS: 531 ([M+H]<sup>+</sup>).

HR APCI MS: calcd for C<sub>41</sub>H<sub>23</sub>O 531.1743, found 531.1735.

### Synthesis of compounds 8A and 8F

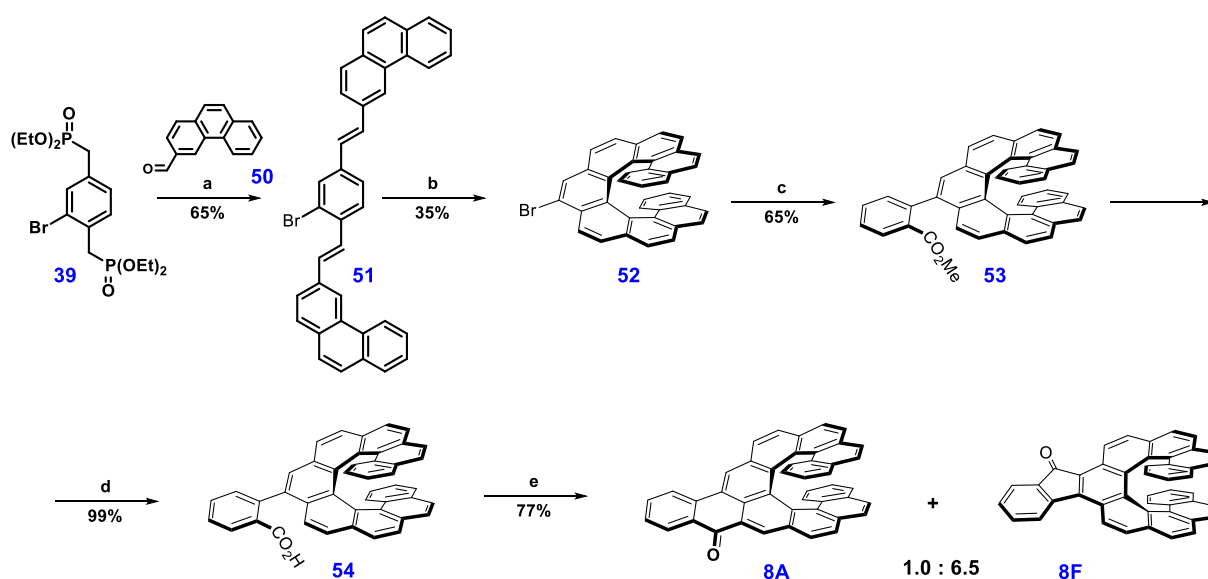

(a) Compound 39 (1.0 equiv.), aldehyde 50 (2.0 equiv.), NaH (4.0 equiv.), PhMe, 120 °C, 30 min;

(b) stilbene 51 (1.0 equiv.), I<sub>2</sub> (0.55 equiv.), PhMe:EtOAc (8:1), hv, rt, 40 h;

(c) helicene 52 (1.0 equiv.), 2-methoxycarbonylphenylboronic acid (1.3 equiv.), Pd<sub>2</sub>dba<sub>3</sub> (4 mol%), Xphos (8 mol%), K<sub>3</sub>PO<sub>4</sub>·H<sub>2</sub>O (6.0 equiv.), PhMe, 90°C, 14 h;

(d) ester 53 (1.0 equiv.), NaOH (5.0 equiv.), THF:MeOH:H<sub>2</sub>O (11:2.8:1.4), 70 °C, 16 h;

(e) MeSO<sub>3</sub>H, 80°C, 1 h.

### Phenanthrene-3-carbaldehyde 50

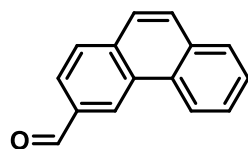

In a well dried Schlenk flask, 3-bromophenanthrene (2.28 g, 8.87 mmol) was dissolved in anhydrous THF (110 mL) under argon. The solution was cooled to -78 °C and then a solution of n-butyllithium (2.5 M in hexanes, 3.6 mL, 9.0 mmol, 1.01 equiv.) was added dropwise. This reaction mixture was stirred at the same temperature for 30 min and then dimethylformamide (1.37 mL, 17.7 mmol, 2.0 equiv.) was added dropwise. The reaction was stirred at -78 °C for 30 min and then warmed to -20 °C.

At this temperature the reaction was quenched with brine (50 mL). The organic phase was separated and the water phase was extracted with diethyl ether (3 x 50 mL). The organic portions were combined and evaporated *in vacuo* and the residue was purified by column chromatography on silica gel (cyclohexane- ethyl acetate 30:1). The product **50** was obtained as a white solid (1.52 g, yield 83%).  $^1\text{H NMR}$  spectrum is in agreement with the published data.<sup>16</sup>

$^1\text{H NMR}$  (400 MHz,  $\text{CDCl}_3$ ): 7.68 (ddd,  $J = 8.1, 7.0, 1.2$ , 1H), 7.75 (ddd,  $J = 8.4, 7.0, 1.5$ , 1H), 7.79 (d,  $J = 8.8$ , 1H), 7.90 (d,  $J = 8.9$ , 1H), 7.94 (dd,  $J = 7.8, 1.5$ , 1H), 8.00 (d,  $J = 8.2$ , 1H), 8.08 (dd,  $J = 8.2, 1.5$ , 1H), 8.78 (d,  $J = 8.2$ , 1H), 9.17 (s, 1H) 10.27 (s, 1H).

### **3,3'-[(2-Bromobenzene-1,4-diyl)di(*E*)ethene-2,1-diyl]diphenanthrene 51**

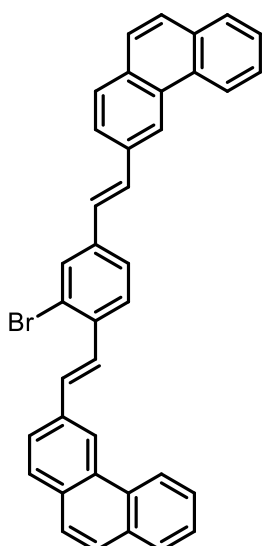

In a well dry round bottom flask were solved previous bisphosphate **39** (1.66 g, 3.63 mmol) and aldehyde **50** (1.5 g, 7.27 mmol, 2.0 equiv.) in dry toluene (90 mL). To this mixture was added NaH (60%, dispersion in mineral oil, 322 mg, 13.45 mmol, 4.0 equiv.) and the mixture was heated at 120 °C for 30 min under inert. The reaction mixture was cooled to room temperature and then slowly poured into a mixture of ice-water- 37 % HCl (100 g -100 ml-100 ml). The organic phase with partially precipitated yellow product was separated and the water phase was extracted with toluene (3 x 50 mL). The organic portions were combined and the volume was reduced to its 20 % on rotavap. The

product **51** as a yellow precipitate (1.33 g, 65%) was collected by filtration over a glass frit S3.

$^1\text{H NMR}$  (400 MHz,  $\text{CD}_2\text{Cl}_2$ ): 7.28 – 7.32 (m, 1H), 7.43 – 7.50 (m, 2H), 7.63 – 7.70 (m, 3H), 7.72 – 7.79 (m, 7H), 7.84 – 7.88 (m, 2H), 7.92 - 7.96 (m, 6H), 8.79 – 8.83 (m, 4H).

$^{13}\text{C NMR}$  (101 MHz,  $\text{CD}_2\text{Cl}_2$ ): 121.9, 122.1, 122.55, 122.56, 124.1, 124.2, 124.6, 125.7, 126.55, 126.58, 126.6, 126.8 (3C), 126.9 (2C), 127.1, 127.19, 127.22, 127.3, 128.7, 129.05, 129.06, 129.9 (2C), 130.2, 130.27, 130.28, 130.9, 131.4, 131.67, 131.73, 132.09, 132.10, 134.9, 135.1, 135.8, 138.2.

**FD MS:** 560 ( $[\text{M}]^{++}$ ).

**HR MS FD:** calcd for  $\text{C}_{38}\text{H}_{25}^{79}\text{Br}$  560.1134; found 560.1144.

<sup>16</sup> S. Fujino, M. Yamaji, H. Okamoto, T. Mutai, I. Yoshikawa, H. Houjou, F. Tani *Photochem. Photobiol. Sci.*, **2017**, *16*, 925.

### 11-Bromononahelicene 52

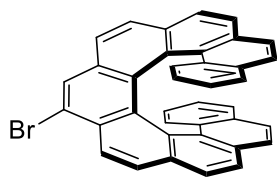

The previous stilbene **51** (1 g, 1.78 mmol) was suspended in toluene (400 mL). This mixture was heated to fully dissolve the starting material. When all the solid was dissolved, the mixture was diluted with toluene (1200 mL) and ethyl acetate (200 mL). Iodine (250 mg, 0.985 mmol) was added to the mixture and the reaction mixture was irradiated with medium-pressure mercury (150 W) lamp for 40 h open to air. The whole reaction mixture was evaporated, and the residue was adsorbed on silica-gel. The product was isolated by continuous extraction with refluxing cyclohexane using Thiele-Pappe attachment. After evaporation of cyclohexane, the residue was triturated in diethyl ether and filtered over glass frit S4 to get slightly yellow product **52** (350 mg, 35%).

$^1\text{H NMR}$  (400 MHz,  $\text{CD}_2\text{Cl}_2$ ): 6.41 (ddt,  $J = 8.3, 6.8, 1.4$ , 2H), 6.99 – 7.06 (m, 3H), 7.08 – 7.14 (m, 5H), 7.19 (d,  $J = 8.5$ , 1H), 7.32 (d,  $J = 6.2$ , 1H), 7.34 (d,  $J = 6.1$ , 1H), 7.36 – 7.40 (m, 1H), 7.46 (d,  $J = 8.2$ , 1H), 7.55 (d,  $J = 8.4$ , 1H), 7.75 (d,  $J = 8.2$ , 1H), 8.24 (d,  $J = 8.4$ , 1H), 8.32 (s, 1H).

$^{13}\text{C NMR}$  (151 MHz, tetrachloroethane- $d_2$ ): 121.1, 122.3, 122.5, 123.56, 123.60, 124.2, 124.6, 124.65, 124.7, 124.8, 125.1, 125.3, 125.4, 125.6, 126.0, 126.1, 126.2, 126.38, 126.43, 126.6, 126.7, 126.8, 127.0, 127.4, 127.5, 128.7, 129.2, 129.7, 129.9, 130.0, 131.0, 131.8, 131.88, 131.92, 131.94.

**FD MS:** 556 ( $[\text{M}]^{+}$ ).

**HR MS FD:** calcd for  $\text{C}_{38}\text{H}_{21}^{79}\text{Br}$  556.0821; found 556.0830.

### Methyl 2-nonahelicen-11-ylbenzoate 53

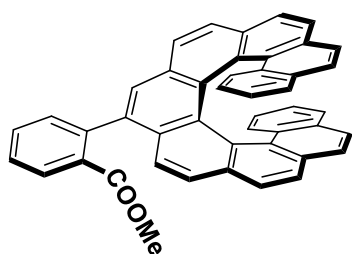

In a dry Schlenk flask was dissolved 11-bromo[9]helicene **52** (270 mg, 0.48 mmol), 2-methoxy-carbonylphenylboronic acid (113 mg, 0.63 mmol, 1.3 equiv.),  $\text{Pd}_2\text{dba}_3$  (17.6 mg, 19.2  $\mu\text{mol}$ , 4 mol%), Xphos (18.3 mg, 38.4  $\mu\text{mol}$ , 8 mol%) and  $\text{K}_3\text{PO}_4 \cdot \text{H}_2\text{O}$  (663 mg, 2.88 mmol, 6 equiv.) in dry toluene (32 mL). The reaction mixture was thoroughly degassed and then heated at 90 °C overnight. The solvent was evaporated *in vacuo* and the residue was purified by column chromatography on silica gel (cyclohexane - dichloromethane 2:1 to 1:1). The product **53** was obtained as a yellow solid (193 mg, 65%). The  $^1\text{H NMR}$  shows mixture of two atropodiastereomers (1:2.5).



**<sup>1</sup>H NMR** (400 MHz, CD<sub>2</sub>Cl<sub>2</sub>): 3.19 and 3.68 (s, in ratio 1:2.5, 3H), 6.37 – 6.51 (m, 2H), 6.94 – 7.13 (m, 6H), 7.14 – 7.23 (m, 3H), 7.25 – 7.48 (m, 8H), 7.64 – 7.69 (m, 1H), 7.74 – 7.86 (m, 4H), 8.11 and 8.23 (m, in ratio 1:2.4, 1H).

**<sup>13</sup>C NMR**: Not recorded due to mixture of atropoisomers.

**FD MS**: 612 ([M]<sup>++</sup>).

**HR MS FD**: calcd for C<sub>46</sub>H<sub>28</sub>O<sub>2</sub> 612.2084; found 612.2090.

#### **2-Nonahelicene-11-ylbenzoic acid 54**

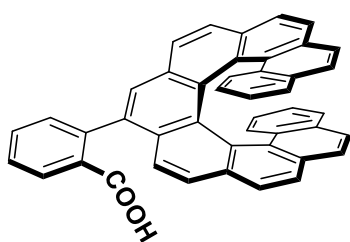

The previous compound **53** (276 mg, 0.45 mmol) and sodium hydroxide (90 mg, 2.25 mmol, 5 equiv.) was dissolved in a mixture of solvents of THF-methanol-water (11 mL:2.8 mL:1.4 mL). The mixture was stirred overnight at 70 °C under inert. Then the reaction was acidified by diluted hydrochloric acid and the mixture was extracted with dichloromethane (4 x 10 mL). The combined organic portions were dried over MgSO<sub>4</sub>. After filtration and evaporation of all the volatiles was obtained product **54** as an amorphous yellow solid (267 mg, yield 99%).

**<sup>1</sup>H NMR** (400 MHz, tetrachloroethane-*d*<sub>2</sub>, 110°C): 6.44 – 6.53 (m, 2H), 7.03 – 7.13 (m, 6H), 7.21 – 7.24 (m, 3H), 7.29 – 7.50 (m, 8H), 7.68 – 7.71 (m, 1H), 7.79 – 7.91 (m, 4H), 8.24 and 8.32 (d, in ratio 1:2.3, 1H).

**<sup>13</sup>C NMR**: Not recorded due to mixture of atropoisomers.

**FD MS**: 598 ([M]<sup>++</sup>).

**HR MS FD**: calcd for C<sub>45</sub>H<sub>26</sub>O<sub>2</sub> 598.1927; found 598.1934.

#### **18H-Naphtho[3,2,1-*mn*]nonahelicen-18-one 8A**

#### **23H-Indeno[1,2-*o*]nonahelicen-23-one 8F**

The previous acid **54** (200 mg, 0.334 mmol) was suspended in methanesulfonic acid (8 mL) and the reaction was stirred at 80 °C for 1 hour. Then, the reaction was poured into water where brown solid was formed. The solid was collected by filtration over glass frit S4 and washed with water and then with methanol and dried. This solid was chromatographed on silica gel (toluene). The first isolated product corresponds to the fluoreno-derivative **8F** and is red solid (130 mg, 66%) the compound corresponds to the aceno-derivative **8A** and is an orange solid (20 mg, 10%). The combined yield (150 mg) is 76 %.

### 18H-Naphtho[3,2,1-mn]nonahelicen-18-one 8A

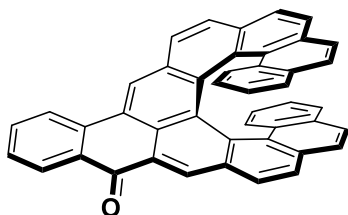

**M.p.:** > 325 °C (CH<sub>3</sub>CN).

**Optical rotation:**  $[\alpha]^{20}_{\text{D}} +6015^{\circ}$  (c 0.026, CH<sub>2</sub>Cl<sub>2</sub>);  $[\alpha]^{20}_{\text{D}} -6297^{\circ}$  (c 0.028, CH<sub>2</sub>Cl<sub>2</sub>).

**<sup>1</sup>H NMR** (600 MHz, tetrachloroethane-*d*<sub>2</sub>): 6.36 (ddd, *J* = 8.3, 6.7, 1.3, 1H), 6.52 (ddd, *J* = 8.3, 6.7, 1.3, 1H), 7.05 (ddd, *J* = 7.9, 6.7, 1.2, 1H), 7.10 (ddd, *J* = 7.9, 6.7, 1.1, 1H), 7.13 (s, 2H), 7.17 (d, *J* = 8.6, 1H), 7.18 (d, *J* = 8.2, 1H), 7.20 (d, *J* = 8.6, 1H), 7.22 (d, *J* = 8.5, 1H), 7.25 (d, *J* = 8.5, 1H), 7.33 (d, *J* = 8.1, 1H), 7.37 – 7.45 (m, 4H), 7.56 (d, *J* = 8.1, 1H), 7.69 – 7.71 (m, 1H), 7.94 (ddd, *J* = 8.2, 7.1, 1.5, 1H), 7.98 (d, *J* = 8.1, 1H), 8.62 (dd, *J* = 7.8, 1.4, 1H), 8.70 (s, 1H), 8.71 (d, *J* = 8.2, 1H), 8.95 (s, 1H).

**<sup>13</sup>C NMR** (151 MHz, tetrachloroethane-*d*<sub>2</sub>): 122.3, 122.8, 123.6, 123.9, 124.1, 124.4, 124.5, 124.86, 124.88, 125.0, 125.2, 125.4, 125.5, 125.8, 125.9, 126.0, 126.1, 126.30, 126.33, 126.59, 126.62, 126.7, 126.9, 127.1, 127.2, 127.58, 127.62, 127.65, 127.8, 128.0, 128.06, 128.10, 128.4, 129.9, 130.3, 130.7, 130.8, 131.1, 131.7, 131.9, 132.3, 132.6, 133.7, 136.5, 183.7.

**IR** (KBr): 3045 w, 2977 w, 2924 w, 2854 w, 1646 s, 1641 s, 1600 m, 1508 m, 1565 w, 1487 w, 1464 w, 1371 w, 1292 m, 1278 w, 1260 w, 1228 w, 1165 w, 1139 w, 1129 w, 1062 w, 1012 w, 976 w, 876 w, 828 s, 753 vs, 744 s, 721 w, 650 w, 621 m, 599 w, 589 m, 521 w, 489 w cm<sup>-1</sup>.

**FD MS:** 580 ([M]<sup>+</sup>).

**HR MS FD:** calcd for C<sub>45</sub>H<sub>24</sub>O 580.1822; found 580.1832.

### 23H-Indeno[1,2-o]nonahelicen-23-one 8F

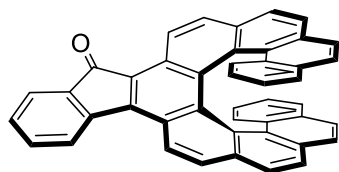

**M.p.:** > 350°C (CH<sub>3</sub>CN).

**<sup>1</sup>H NMR** (600 MHz, tetrachloroethane-*d*<sub>2</sub>): 6.51 – 6.57 (m, 2H), 7.05 – 7.13 (m, 6H), 7.20 (d, *J* = 8.5, 2H), 7.21 (d, *J* = 8.5, 1H), 7.34 (m, *J* = 8.5, 3H), 7.41 – 7.43 (m, 2H), 7.44 – 7.46 (m, 1H), 7.49 (d, *J* = 8.4, 1H), 7.56 (d, *J* = 8.4, 1H), 7.66 (td, *J* = 7.5, 1.3, 1H), 7.82 (d, *J* = 7.2, 1H), 8.24 (d, *J* = 7.4, 1H), 8.53 (d, *J* = 8.4, 1H), 9.07 (d, *J* = 8.3, 1H).

**<sup>13</sup>C NMR** (151 MHz, tetrachloroethane-*d*<sub>2</sub>): 121.4, 121.7, 122.6, 122.9, 123.4, 123.6, 123.9, 124.2, 124.7, 124.84, 124.86, 124.91, 124.94, 125.3, 125.4, 125.7, 125.8, 126.17, 126.23, 126.3, 126.4, 126.58, 126.61, 126.7, 126.79, 126.83, 126.85, 126.9, 127.2, 127.9, 128.4, 128.6, 128.9, 129.2, 129.99, 130.03, 131.9, 132.0, 132.1, 132.9, 133.4, 135.6, 143.8, 144.0, 195.8.

**IR (ATR):** 3043 w, 1695 ms, 1606 m, 1584 w, 1561 w, 1575 w, 1519 w, 1504 w, 1483 w, 1460 m, 1433 w, 1395 w, 1377 w, 1330 m, 1273 w, 1236 w, 1225 m, 1216 m, 1182 m, 1168 m, 1156 m, 1087 w, 1044 w, 1037 w, 1028 w, 1007 w, 975 w, 947 w, 936 w, 920 w, 885 w, 863 w, 850 m, 831 ms, 813 m, 788 ms, 750 m, 739 ms, 722 s, 701 ms, 680 w, 674 w, 656 w, 646 w, 637 w, 623 m, 608 w, 597 m, 590 m, 536 m, 524 m, 507 w, 472 w, 443 w, 427 w, 416 w  $\text{cm}^{-1}$ .

**FD MS:** 580 ( $[\text{M}]^{++}$ ).

**HR MS FD:** calcd for  $\text{C}_{45}\text{H}_{24}\text{O}$  580.1822; found 580.1815.

## HPLC Resolution of 1A, 2A, 3A, 4A, 5A, 6A, 6F, 7A, and 8A into Enantiomers

### Chiral resolution of 1A

**Chiral HPLC separation:** *Anal.:* ChiralArt Amylose-SA (150 x 3 mm, 3  $\mu$ m, YMC), heptane – toluene 50:50, 1.0% IPA @ 1.0 mL/min., 35  $^{\circ}$ C,  $t_R(+)$  = 6.0 min. (>99% *ee*),  $t_R(-)$  = 8.4 min. (>99% *ee*); *Semiprep.:* ChiralArt Amylose-SA (250 x 20 mm, 5  $\mu$ m, YMC), heptane – toluene 50:50, 0.5% IPA @20 mL/min.

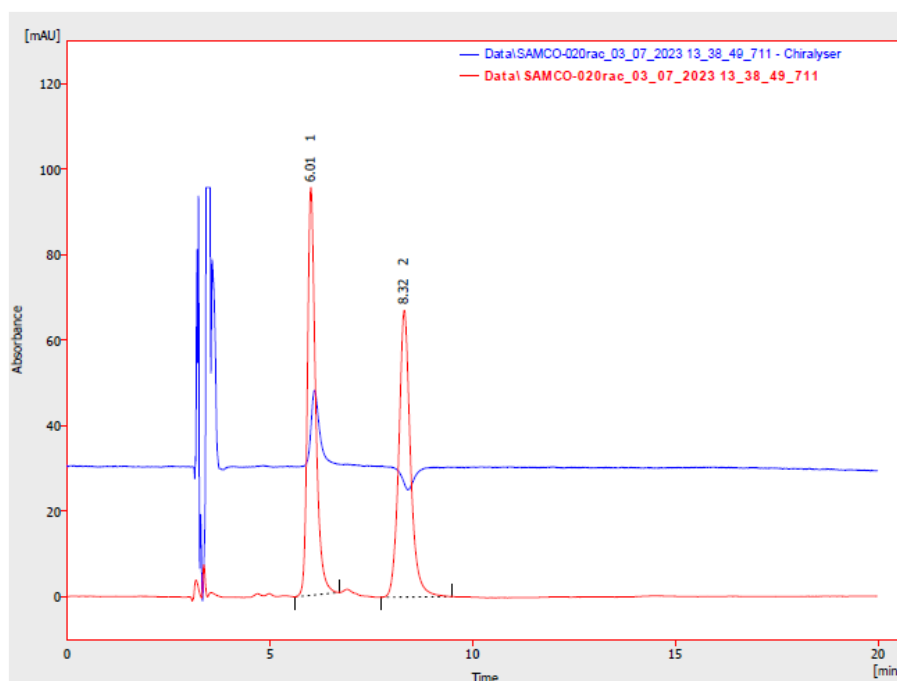

Result Table (Uncal - Data[SAMCO-020rac\_03\_07\_2023 13\_38\_49\_711])

|   | Reten. Time [min] | Area [mAU.s] | Height [mAU] | Area [%] | Height [%] | W05 [min] | PDA Peak Purity | Compound Name |
|---|-------------------|--------------|--------------|----------|------------|-----------|-----------------|---------------|
| 1 | 6.012             | 1335.201     | 95.428       | 49.8     | 58.7       | 0.20      | 910             |               |
| 2 | 8.317             | 1347.896     | 67.064       | 50.2     | 41.3       | 0.29      | 941             |               |
|   | Total             | 2683.098     | 162.492      | 100.0    | 100.0      |           |                 |               |

**Figure S4.** HPLC of *rac*-1A (red: UV detector (315 nm), blue: downstream polarimetric detector).

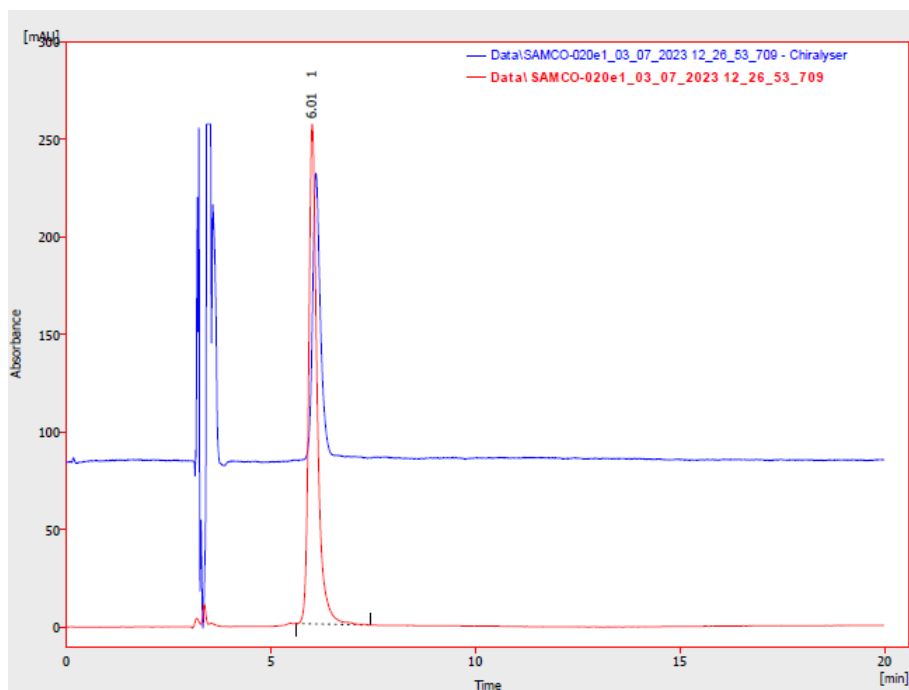

**Figure S5.** HPLC of (+)-(*P*)-**1A** (red: UV detector (315 nm), blue: downstream polarimetric detector).

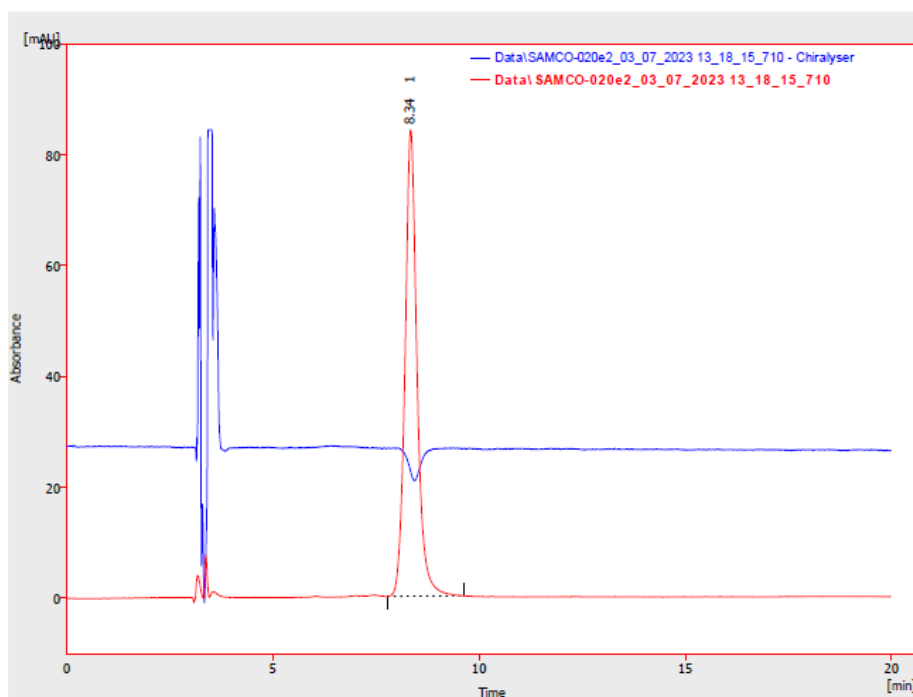

**Figure S6.** HPLC of (-)-(*M*)-**1A** (red: UV detector (315 nm), blue: downstream polarimetric detector).

## Chiral resolution of 2A

**Chiral HPLC separation:** *Anal.:* Chiralpak IE (250 x 4.6 mm, 5 mm, DAICEL), toluene, 1% IPA @ 1.0 mL/min., 35 °C,  $t_R(+)$  = 7.2 min. (>99% ee),  $t_R(-)$  = 8.8 min. (>99% ee); *Semiprep.:* CHIRALPAK® IE (250 x 20 mm, 5 μm, Chiral Technologies), toluene, 0.5% IPA @20 mL/min.

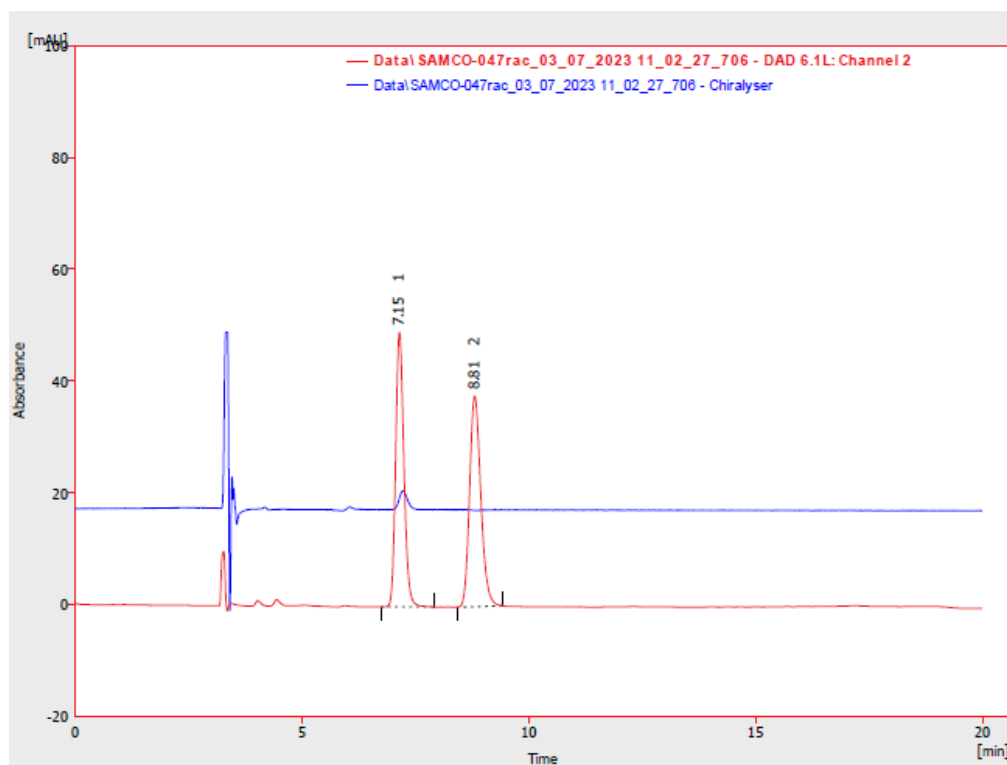

Result Table (Uncal - Data\SAMCO-047rac\_03\_07\_2023 11\_02\_27\_706 - DAD 6.1L: Channel 2)

|   | Reten. Time [min] | Area [mAU.s] | Height [mAU] | Area [%] | Height [%] | W05 [min] | PDA Peak Purity | Compound Name |
|---|-------------------|--------------|--------------|----------|------------|-----------|-----------------|---------------|
| 1 | 7.148             | 622.911      | 49.181       | 49.0     | 56.6       | 0.19      | 410             |               |
| 2 | 8.806             | 648.546      | 37.736       | 51.0     | 43.4       | 0.27      | 546             |               |
|   | Total             | 1271.457     | 86.918       | 100.0    | 100.0      |           |                 |               |

**Figure S7.** HPLC of *rac*-2A (red: UV detector (350 nm), blue: downstream polarimetric detector).

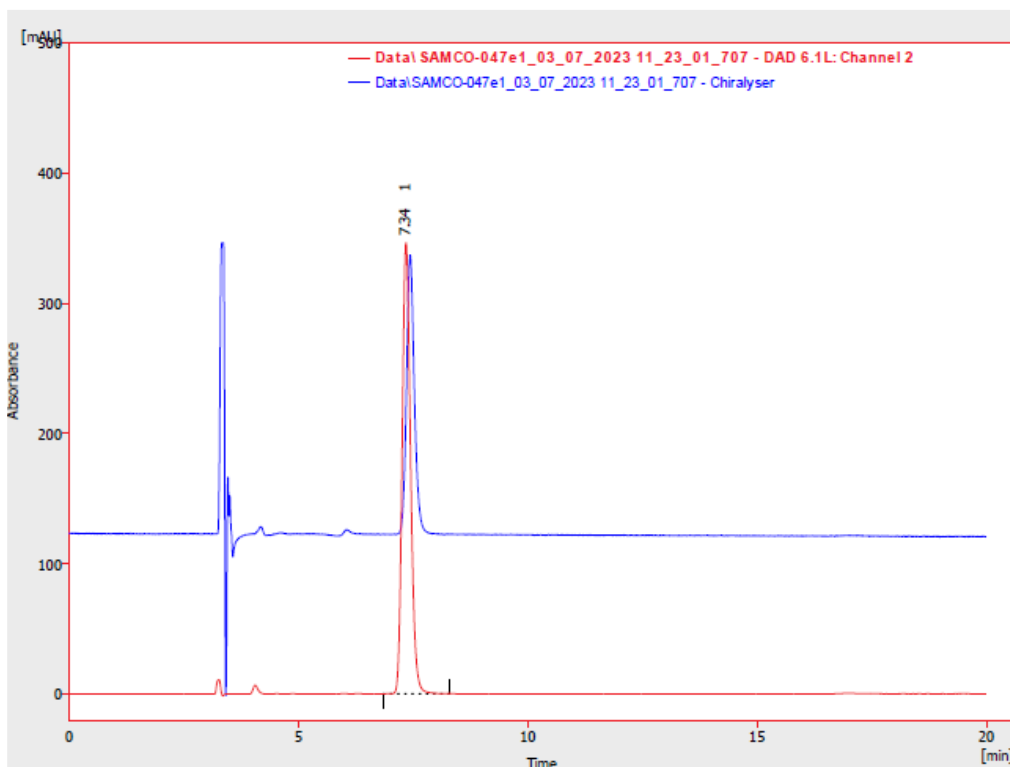

**Figure S8.** HPLC of (+)-(*P*)-**2A** (red: UV detector (350 nm), blue: downstream polarimetric detector).

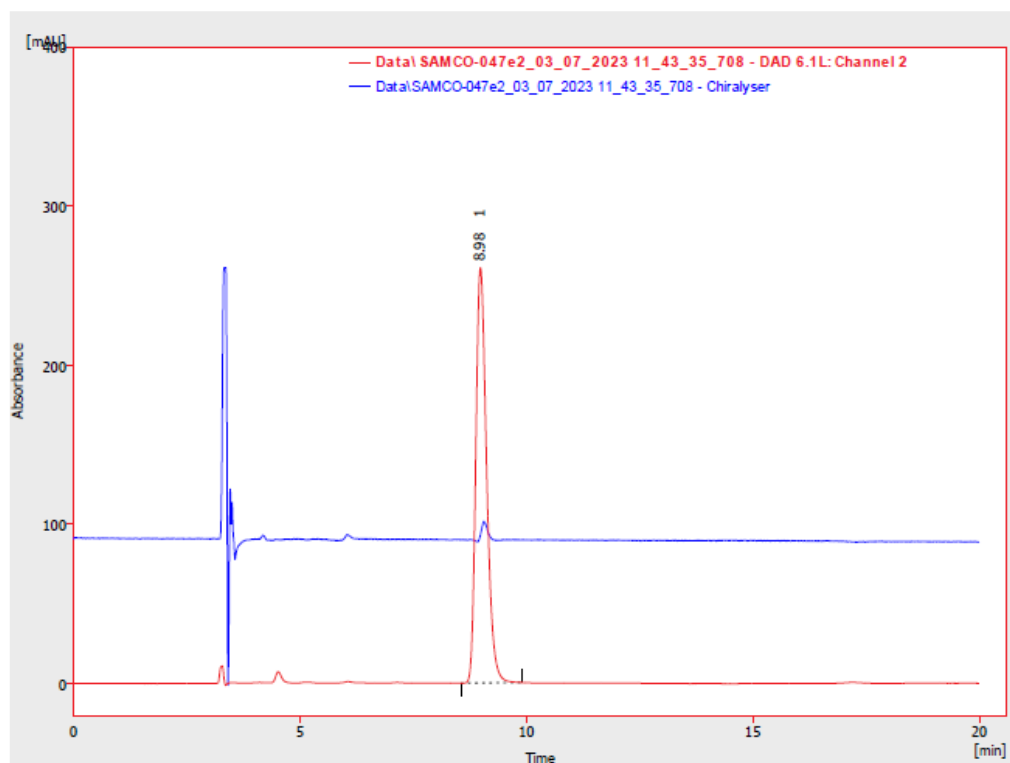

**Figure S9.** HPLC of (-)-(*M*)-**2A** (red: UV detector (350 nm), blue: downstream polarimetric detector).

## Chiral resolution of 3A

**Chiral HPLC separation:** *Anal.:* Chiralpak IE (250 x 4.6 mm, 5 mm, DAICEL), toluene, 1% IPA @ 1.0 mL/min., 35 °C,  $t_R(+)$  = 6.2 min. (>99% ee),  $t_R(-)$  = 7.0 min. (>99% ee); *Semiprep.:* CHIRALPAK® IE (250 x 20 mm, 5 μm, DAICEL), toluene, 0.5% IPA @20 mL/min.

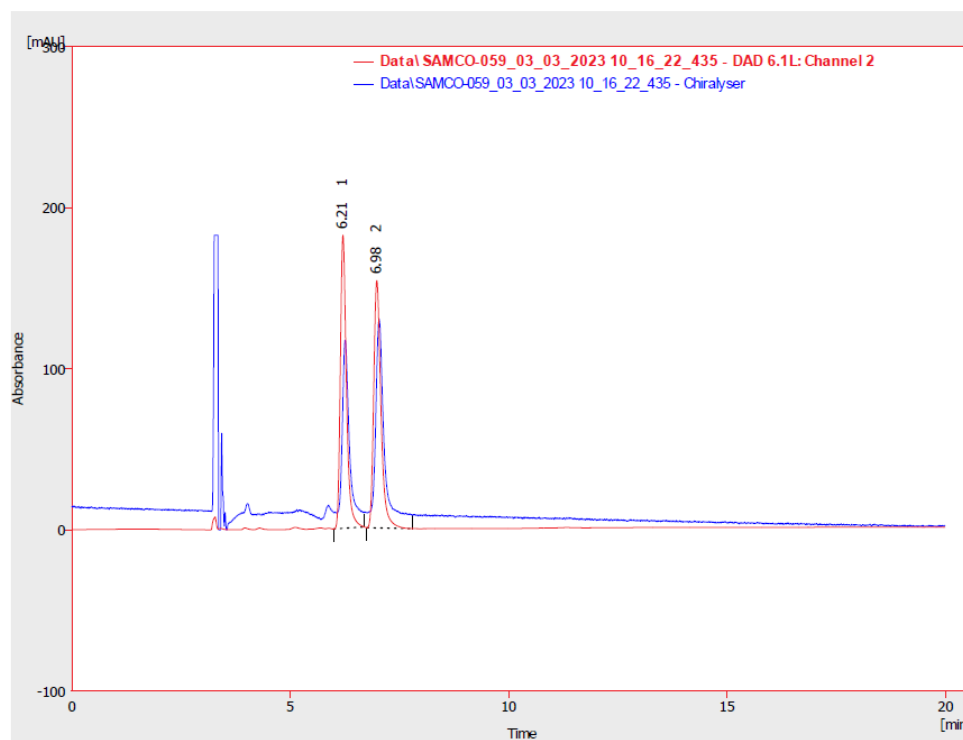

Result Table (Uncal - Data[SAMCO-059\_03\_03\_2023\_10\_16\_22\_435 - DAD 6.1L: Channel 2])

|       | Reten. Time [min] | Area [mAU.s] | Height [mAU] | Area [%] | Height [%] | W05 [min] | PDA Peak Purity | Compound Name |
|-------|-------------------|--------------|--------------|----------|------------|-----------|-----------------|---------------|
| 1     | 6.208             | 1757.570     | 181.920      | 49.8     | 54.2       | 0.14      | 687             |               |
| 2     | 6.983             | 1771.420     | 153.465      | 50.2     | 45.8       | 0.17      | 632             |               |
| Total |                   | 3528.990     | 335.384      | 100.0    | 100.0      |           |                 |               |

**Figure S10.** HPLC of *rac*-3A (red: UV detector (350 nm), blue: downstream polarimetric detector).



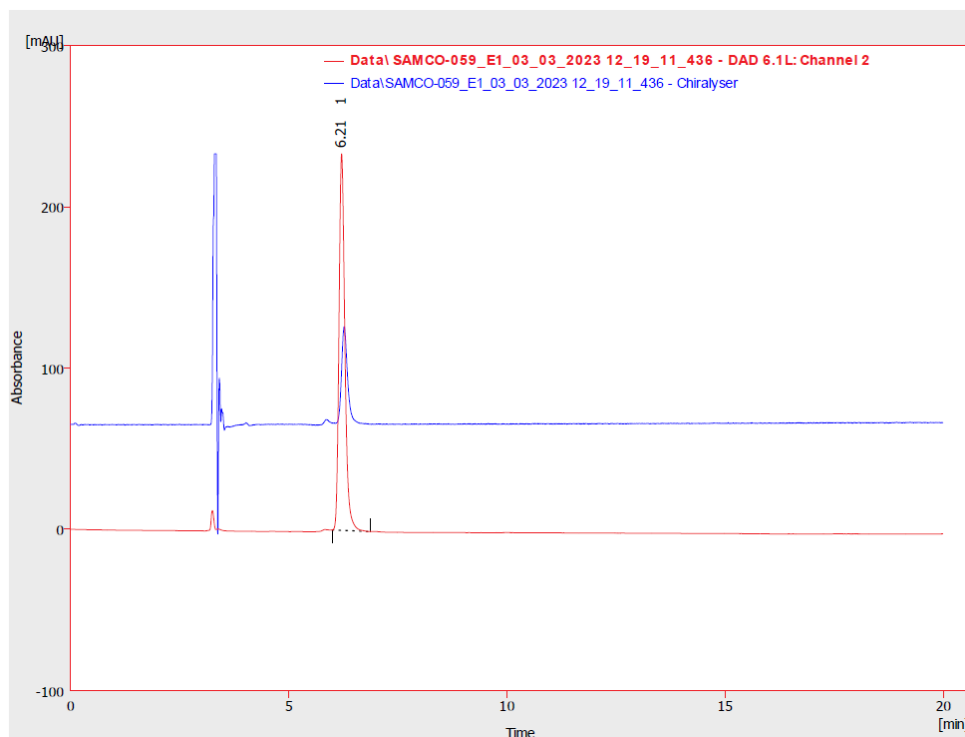

**Figure S11.** HPLC of (+)-(*P*)-**3A** (red: UV detector (350 nm), blue: downstream polarimetric detector).

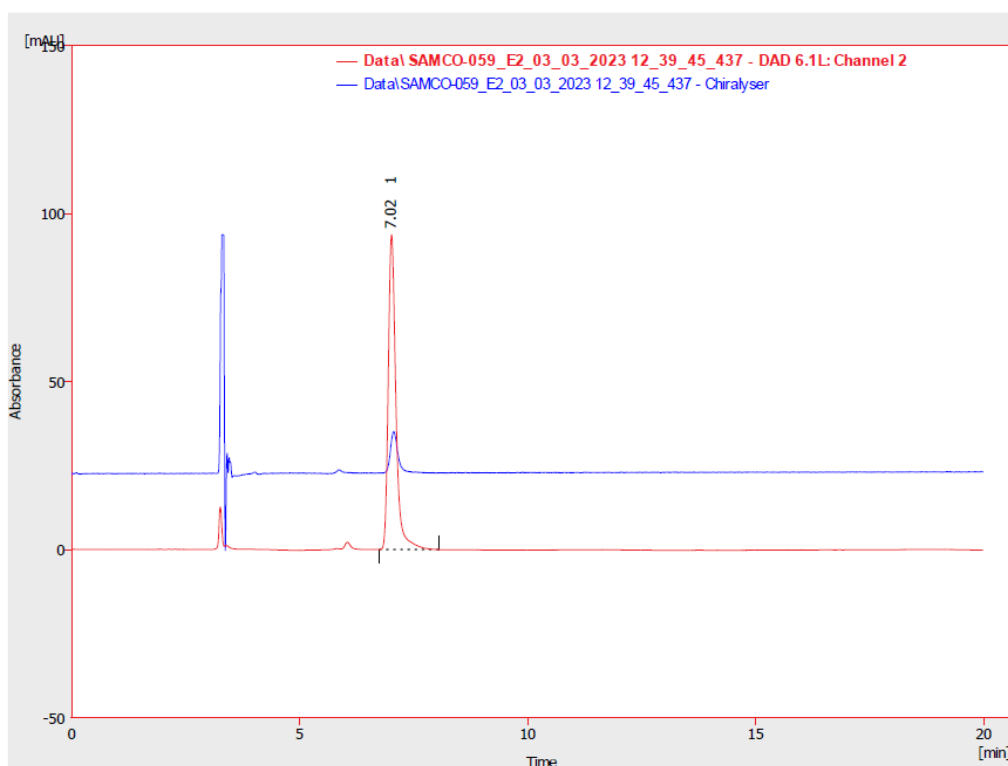

**Figure S12.** HPLC of (-)-(*M*)-**3A** (red: UV detector (350 nm), blue: downstream polarimetric detector).

## Chiral resolution of 4A

**Chiral HPLC separation:** *Anal.:* Chiralpak IE (250 x 4.6 mm, 5 mm, DAICEL), toluene, 1% IPA @ 1.0 mL/min., 35 °C,  $t_R(+)$  = 6.1 min. (>99% ee),  $t_R(-)$  = 7.0 min. (>99% ee); *Semiprep.:* CHIRALPAK® IE (250 x 20 mm, 5 μm, DAICEL), toluene, 0.5% IPA @20 mL/min.

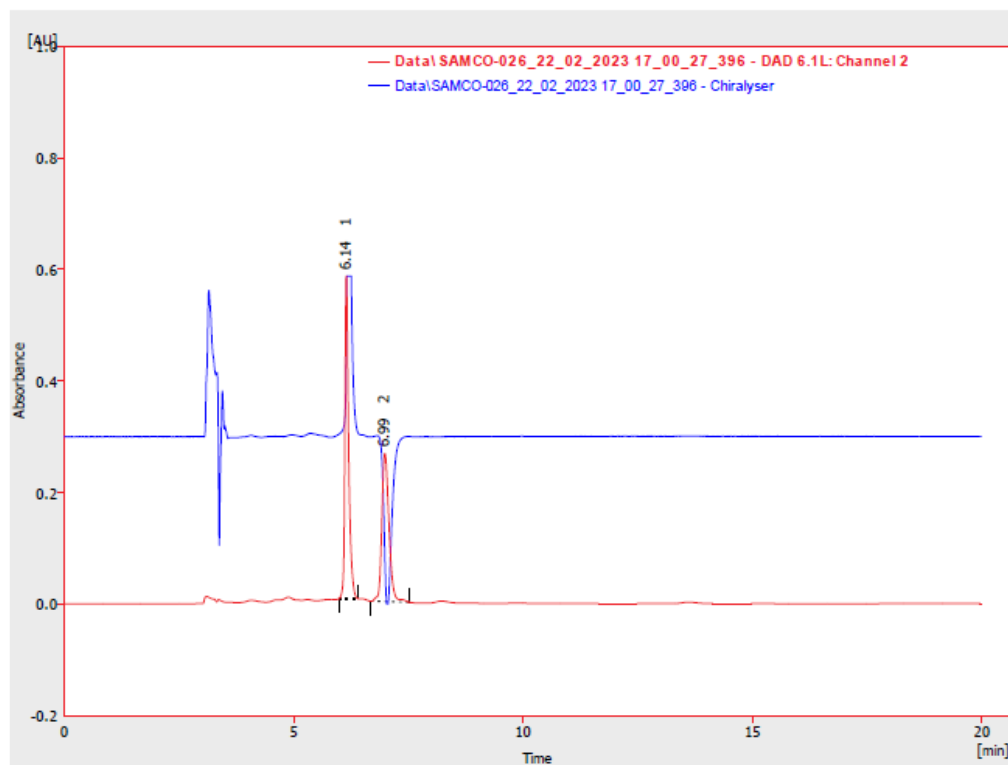

Result Table (Uncal - Data\SAMCO-026\_22\_02\_2023 17\_00\_27\_396 - DAD 6.1L: Channel 2)

|   | Reten. Time [min] | Area [mAU.s] | Height [mAU] | Area [%] | Height [%] | W05 [min] | PDA Peak Purity | Compound Name |
|---|-------------------|--------------|--------------|----------|------------|-----------|-----------------|---------------|
| 1 | 6.145             | 3293.652     | 579.047      | 53.3     | 68.5       | 0.08      | 840             |               |
| 2 | 6.987             | 2887.137     | 265.806      | 46.7     | 31.5       | 0.16      | 750             |               |
|   | Total             | 6180.788     | 844.853      | 100.0    | 100.0      |           |                 |               |

**Figure S13.** HPLC of *rac*-4A (red: UV detector (350 nm), blue: downstream polarimetric detector).

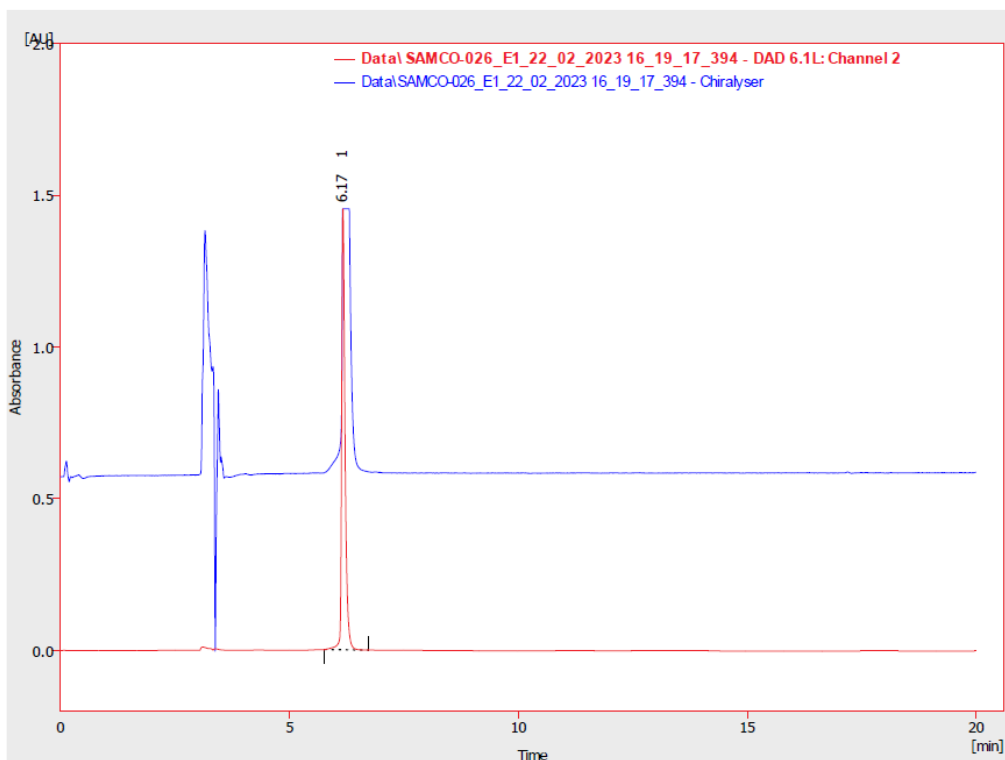

**Figure S14.** HPLC of (+)-(P)-4A (red: UV detector (350 nm), blue: downstream polarimetric detector).

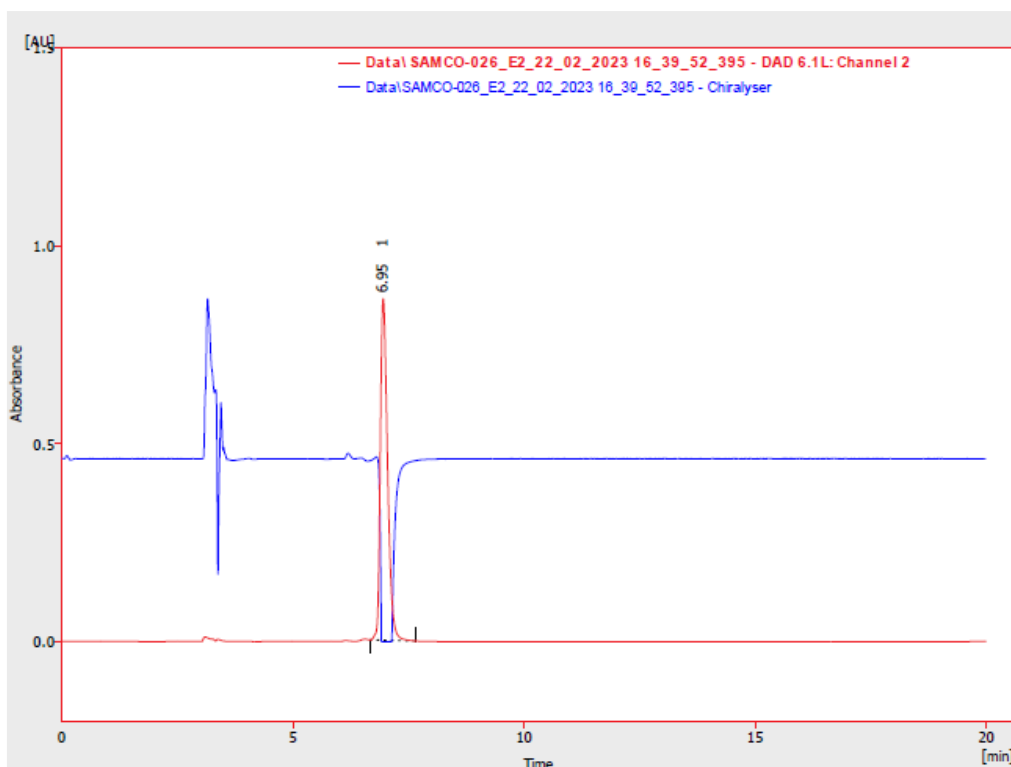

**Figure S15.** HPLC of (-)-(M)-4A (red: UV detector (350 nm), blue: downstream polarimetric detector).

## Chiral resolution of 5A

**Chiral HPLC separation:** *Anal.:* Chiralpak IE (250 x 4.6 mm, 5 mm, DAICEL), toluene, 1% IPA @ 1.0 mL/min., 35 °C,  $t_{R}(+)$  = 8.5 min. (>99% ee),  $t_{R}(-)$  = 10.1 min. (>99% ee); *Semiprep.:* CHIRALPAK® IE (250 x 20 mm, 5 μm, Chiral Technologies), toluene, 0.5% IPA @20 mL/min.

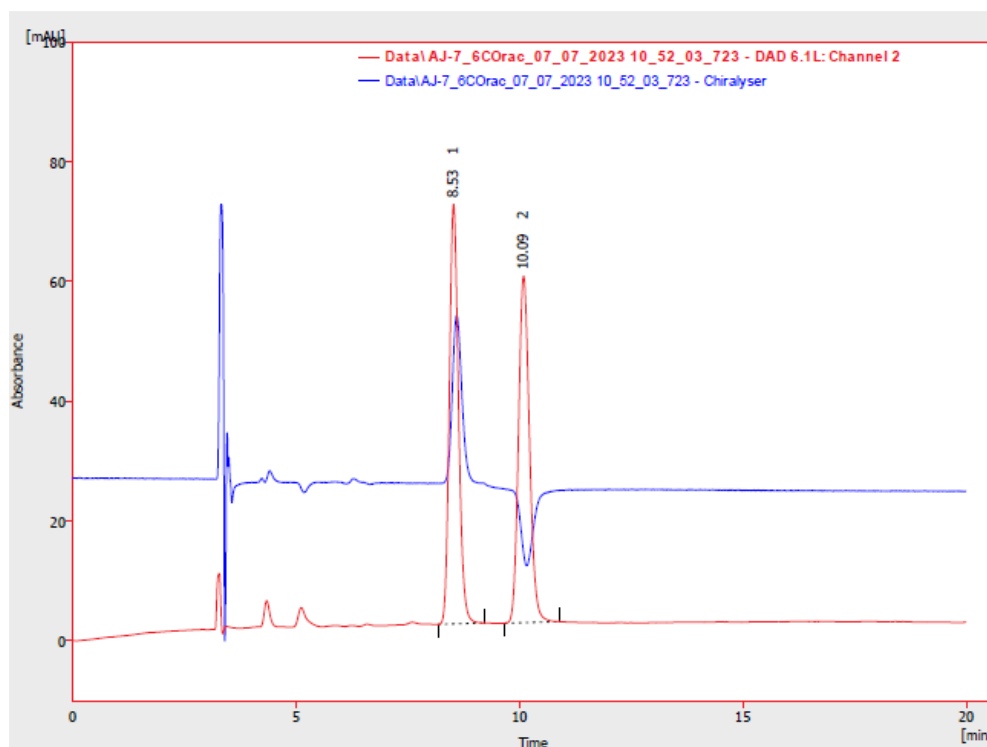

Result Table (Uncal - Data)AJ-7\_6COrac\_07\_07\_2023 10\_52\_03\_723 - DAD 6.1L: Channel 2)

|   | Reten. Time [min] | Area [mAU.s] | Height [mAU] | Area [%] | Height [%] | W05 [min] | PDA Peak Purity | Compound Name |
|---|-------------------|--------------|--------------|----------|------------|-----------|-----------------|---------------|
| 1 | 8.525             | 995.700      | 70.116       | 50.2     | 54.8       | 0.22      | 463             |               |
| 2 | 10.093            | 986.576      | 57.903       | 49.8     | 45.2       | 0.26      | 449             |               |
|   | Total             | 1982.276     | 128.019      | 100.0    | 100.0      |           |                 |               |

**Figure S16.** HPLC of *rac*-5A (red: UV detector (350 nm), blue: downstream polarimetric detector).

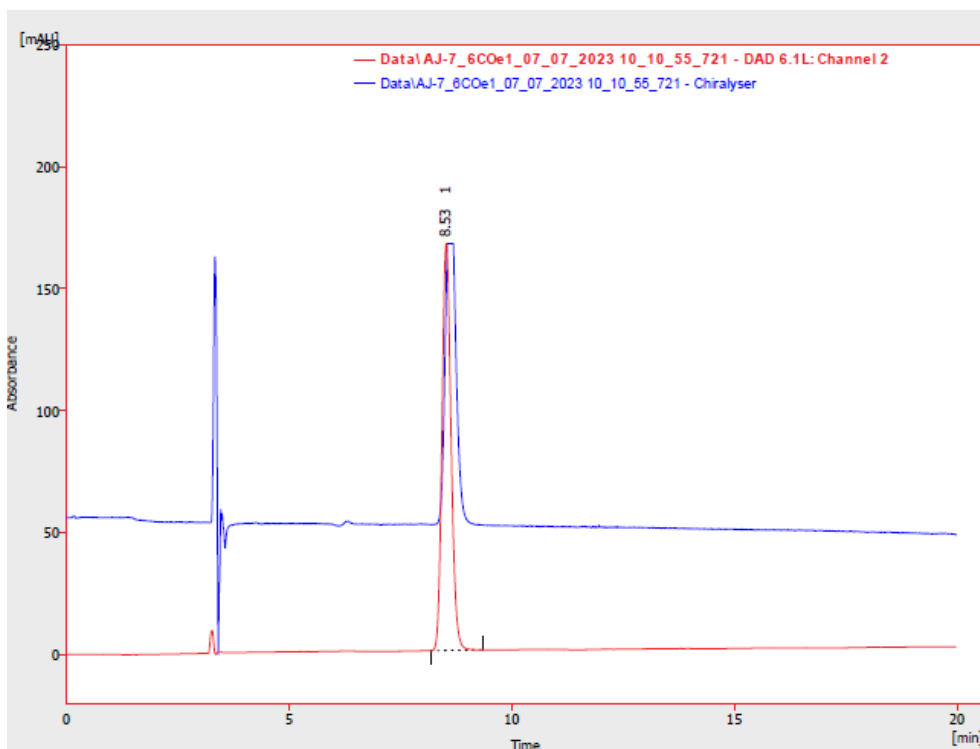

**Figure S17.** HPLC of (+)-(P)-5A (red: UV detector (350 nm), blue: downstream polarimetric detector).

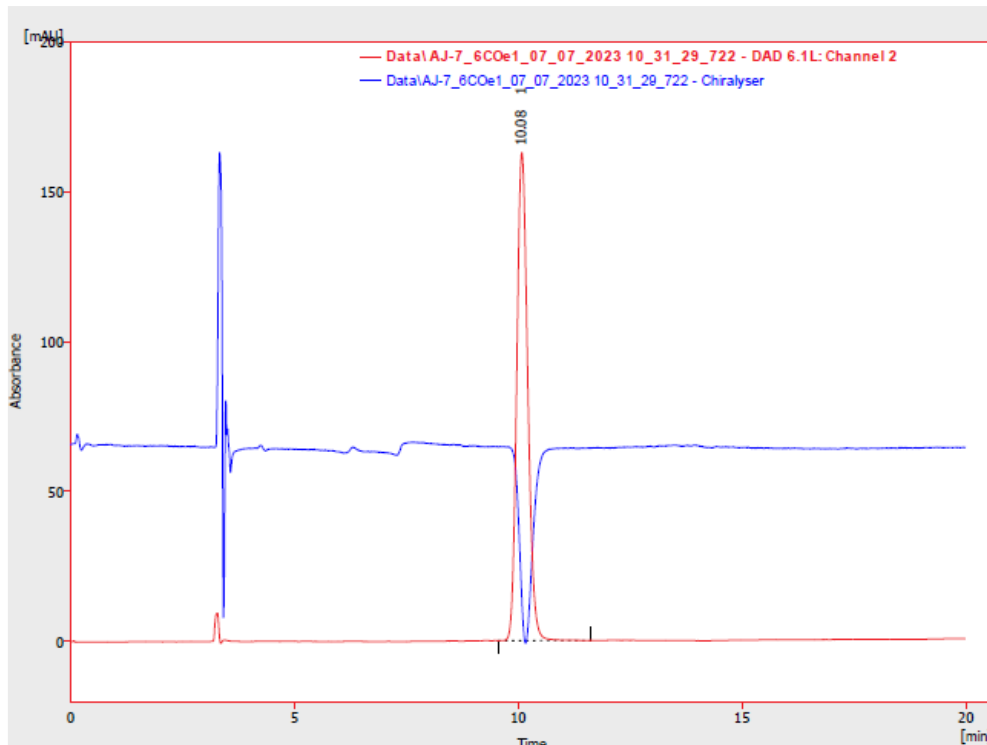

**Figure S18.** HPLC of (-)-(M)-5A (red: UV detector (350 nm), blue: downstream polarimetric detector).

## Chiral resolution of 6A

**Chiral HPLC separation:** *Anal.:* Chiralpak IE (250 x 4.6 mm, 5 mm, DAICEL), toluene, 1% IPA @ 1.0 mL/min., 35 °C,  $t_{R(+)} = 8.8$  min. (>99% ee),  $t_{R(-)} = 12.5$  min. (>99% ee); *Semiprep.:* CHIRALPAK® IE (250 x 20 mm, 5 μm, Chiral Technologies), toluene, 0.5% IPA @20 mL/min.

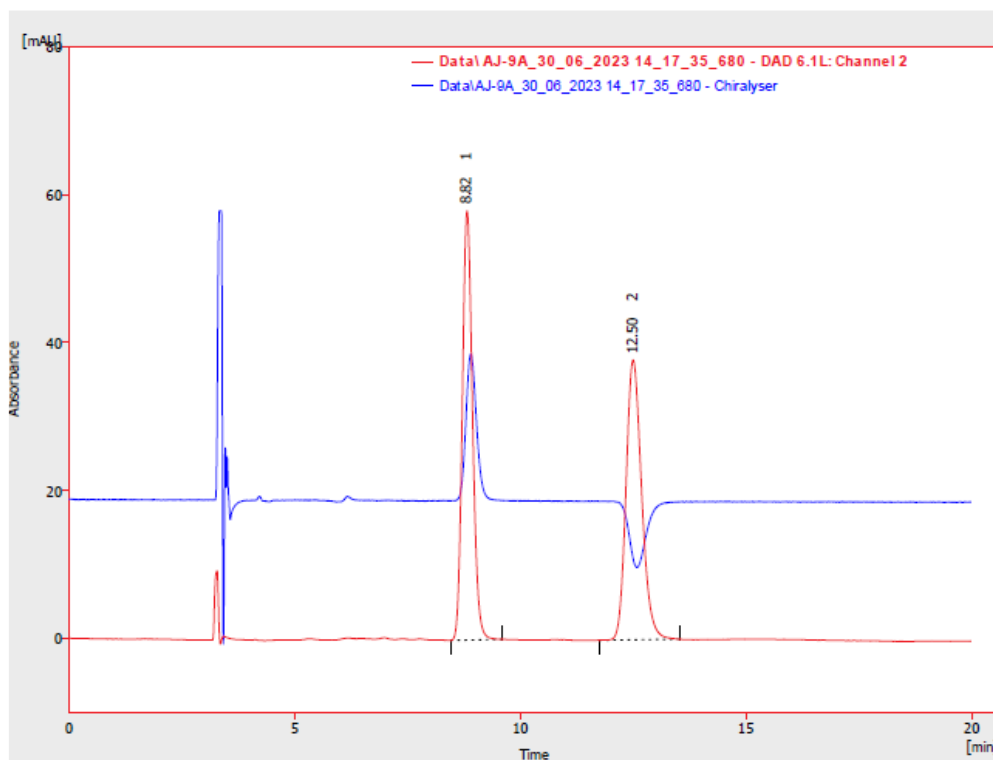

Result Table (Uncal - Data\AJ-94\_30\_06\_2023 14\_17\_35\_680 - DAD 6.1L: Channel 2)

|   | Reten. Time [min] | Area [mAU.s] | Height [mAU] | Area [%] | Height [%] | W05 [min] | PDA Peak Purity | Compound Name |
|---|-------------------|--------------|--------------|----------|------------|-----------|-----------------|---------------|
| 1 | 8.818             | 909.797      | 58.068       | 49.9     | 60.5       | 0.24      | 770             |               |
| 2 | 12.496            | 911.965      | 37.674       | 50.1     | 39.5       | 0.37      | 821             |               |
|   | Total             | 1821.762     | 95.943       | 100.0    | 100.0      |           |                 |               |

**Figure S19.** HPLC of *rac*-6A (red: UV detector (350 nm), blue: downstream polarimetric detector).

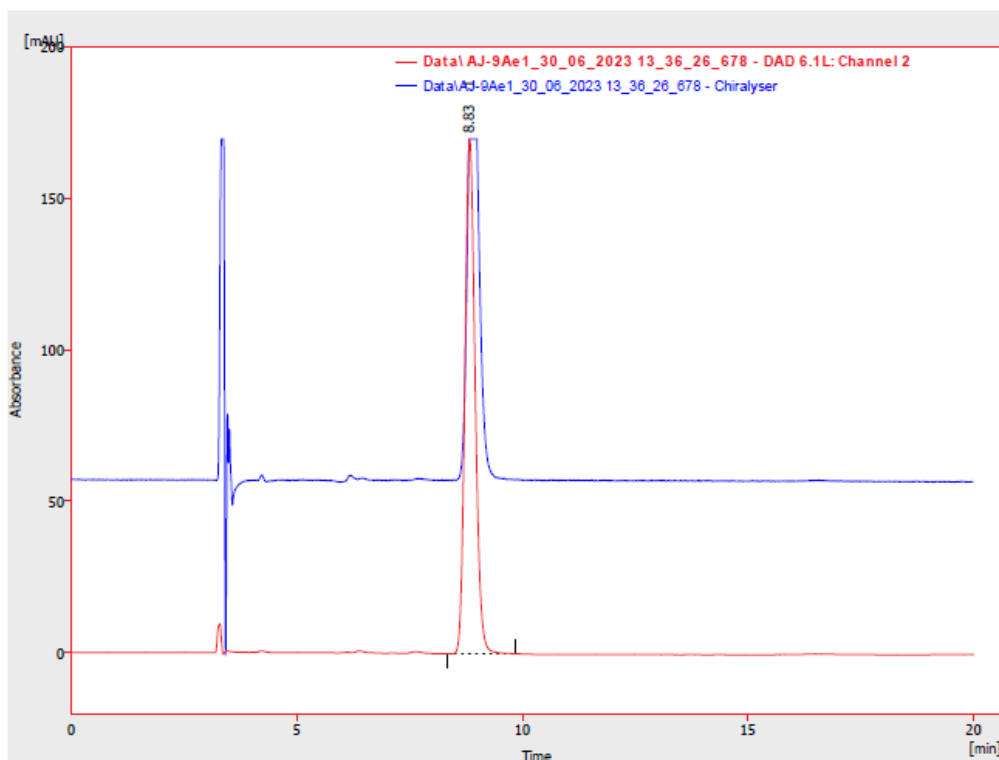

**Figure S20.** HPLC of (+)-(P)-6A (red: UV detector (350 nm), blue: downstream polarimetric detector).

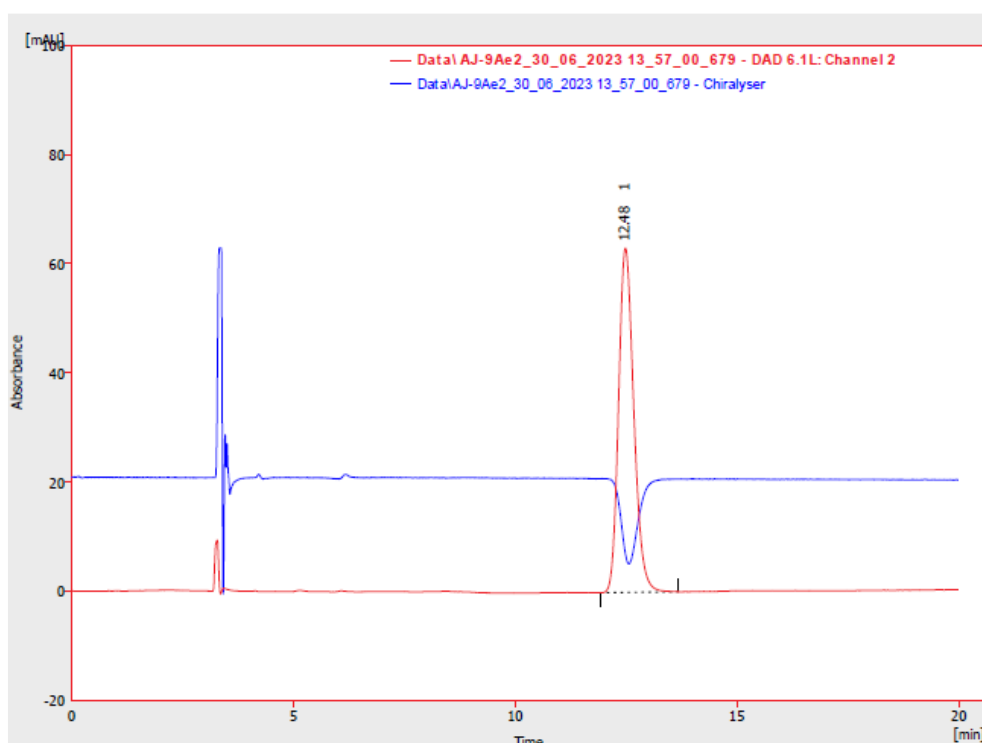

**Figure S21.** HPLC of (-)-(M)-6A (red: UV detector (350 nm), blue: downstream polarimetric detector).

## Chiral resolution of 6F

**Chiral HPLC separation:** *Anal.:* Chiralpak IE (250 x 4.6 mm, 5 mm, DAICEL), toluene, 1% IPA @ 1.0 mL/min., 35 °C,  $t_R(+)$  = 5.3 min. (>99% ee),  $t_R(-)$  = 7.4 min. (>99% ee); *Semiprep.:* CHIRALPAK® IE (250 x 20 mm, 5 μm, Chiral Technologies), toluene, 0.5% IPA @20 mL/min.

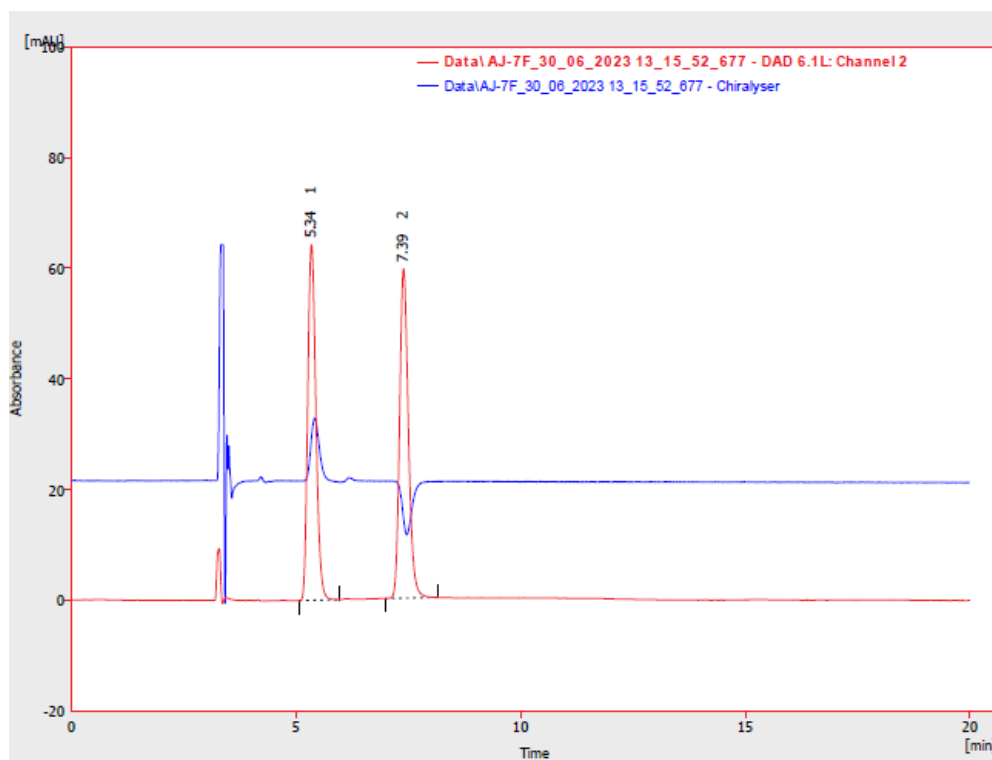

Result Table (Uncal - Data\AJ-7F\_30\_06\_2023 13\_15\_52\_677 - DAD 6.1L: Channel 2)

|   | Reten. Time [min] | Area [mAU.s] | Height [mAU] | Area [%] | Height [%] | W05 [min] | PDA Peak Purity | Compound Name |
|---|-------------------|--------------|--------------|----------|------------|-----------|-----------------|---------------|
| 1 | 5.343             | 810.851      | 64.310       | 50.1     | 51.9       | 0.20      | 902             |               |
| 2 | 7.393             | 808.579      | 59.572       | 49.9     | 48.1       | 0.21      | 890             |               |
|   | Total             | 1619.430     | 123.882      | 100.0    | 100.0      |           |                 |               |

**Figure S22.** HPLC of *rac*-6F (red: UV detector (350 nm), blue: downstream polarimetric detector).



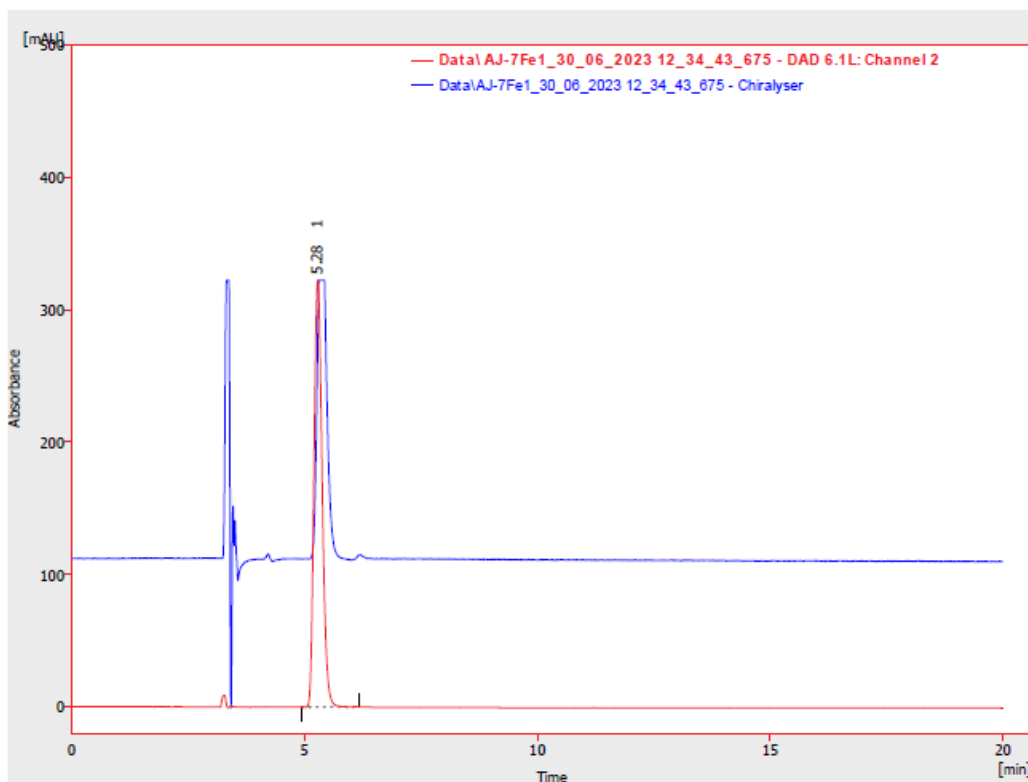

**Figure S23.** HPLC of (+)-(P)-6F (red: UV detector (350 nm), blue: downstream polarimetric detector).

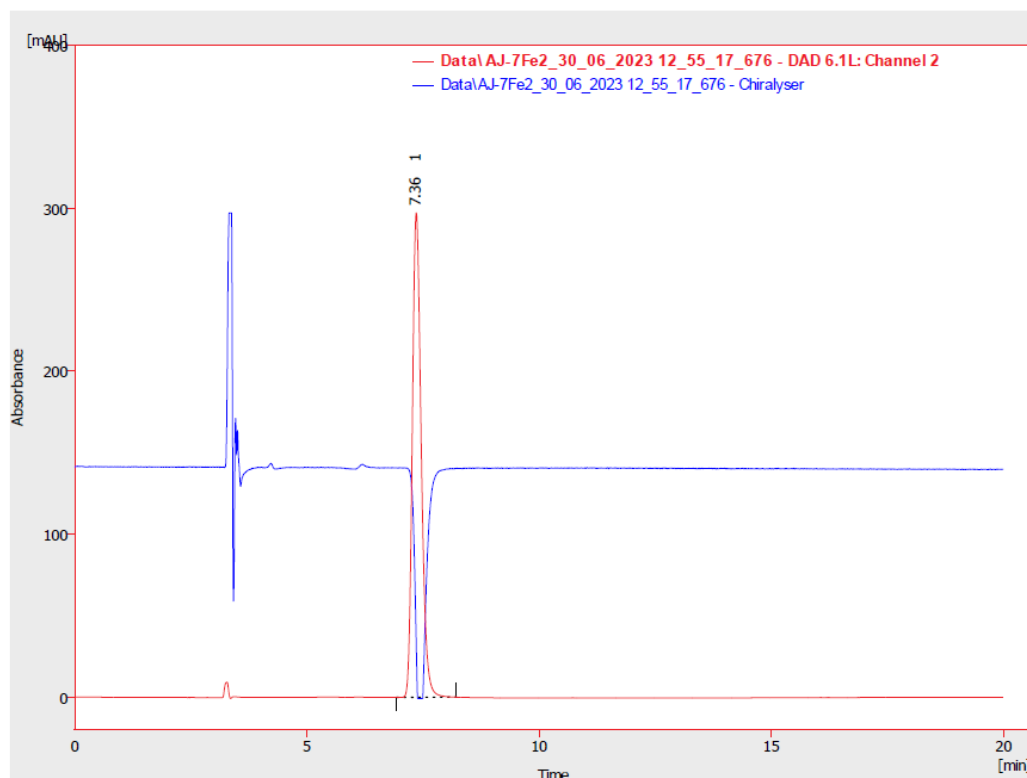

**Figure S24.** HPLC of (-)-(M)-6F (red: UV detector (350 nm), blue: downstream polarimetric detector).

## Chiral resolution of 7A

**Chiral HPLC separation:** *Anal.:* Chiralpak IE (250 x 4.6 mm, 5 mm, DAICEL), toluene, 1% IPA @ 1.0 mL/min., 35 °C,  $t_{R(+)}$  = 7.9 min. (>99% ee),  $t_{R(-)}$  = 10.0 min. (>99% ee); *Semiprep.:* CHIRALPAK® IE (250 x 20 mm, 5 μm, Chiral Technologies), toluene, 0.5% IPA @20 mL/min.

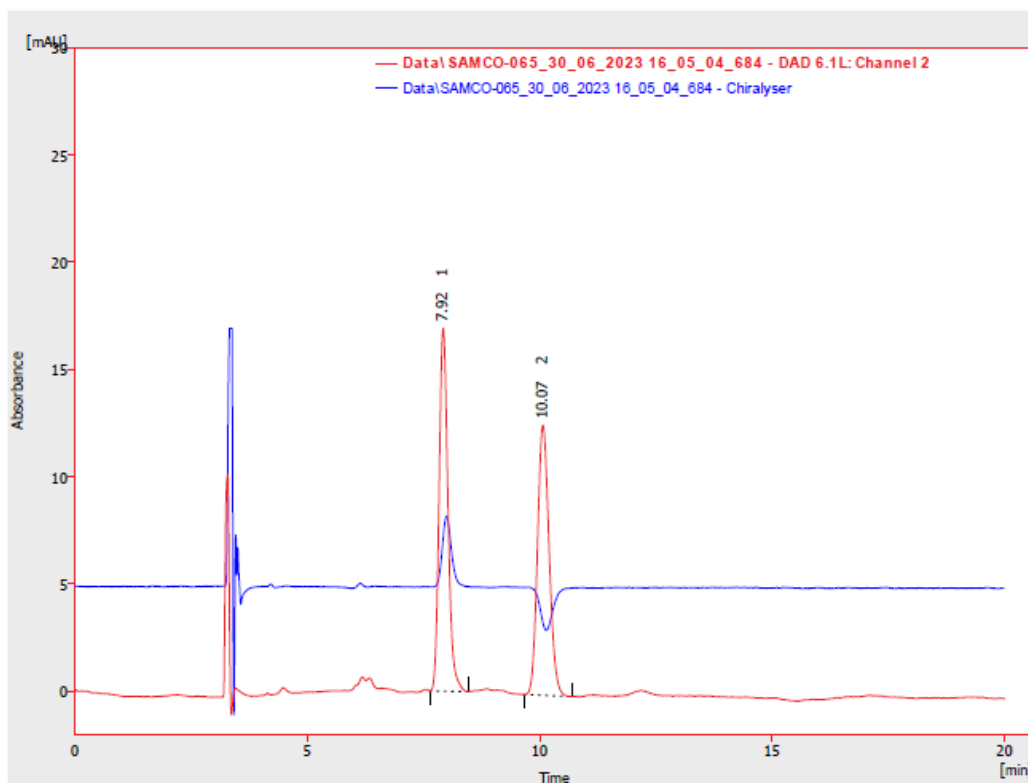

Result Table (Uncal - Data\SAMCO-065\_30\_06\_2023 16\_05\_04\_684 - DAD 6.1L: Channel 2)

|   | Reten. Time [min] | Area [mAU.s] | Height [mAU] | Area [%] | Height [%] | W05 [min] | PDA Peak Purity | Compound Name |
|---|-------------------|--------------|--------------|----------|------------|-----------|-----------------|---------------|
| 1 | 7.923             | 223.916      | 16.930       | 50.6     | 57.3       | 0.20      | 915             |               |
| 2 | 10.067            | 218.705      | 12.601       | 49.4     | 42.7       | 0.27      | 942             |               |
|   | Total             | 442.621      | 29.531       | 100.0    | 100.0      |           |                 |               |

**Figure S25.** HPLC of *rac*-7A (red: UV detector (350 nm), blue: downstream polarimetric detector).

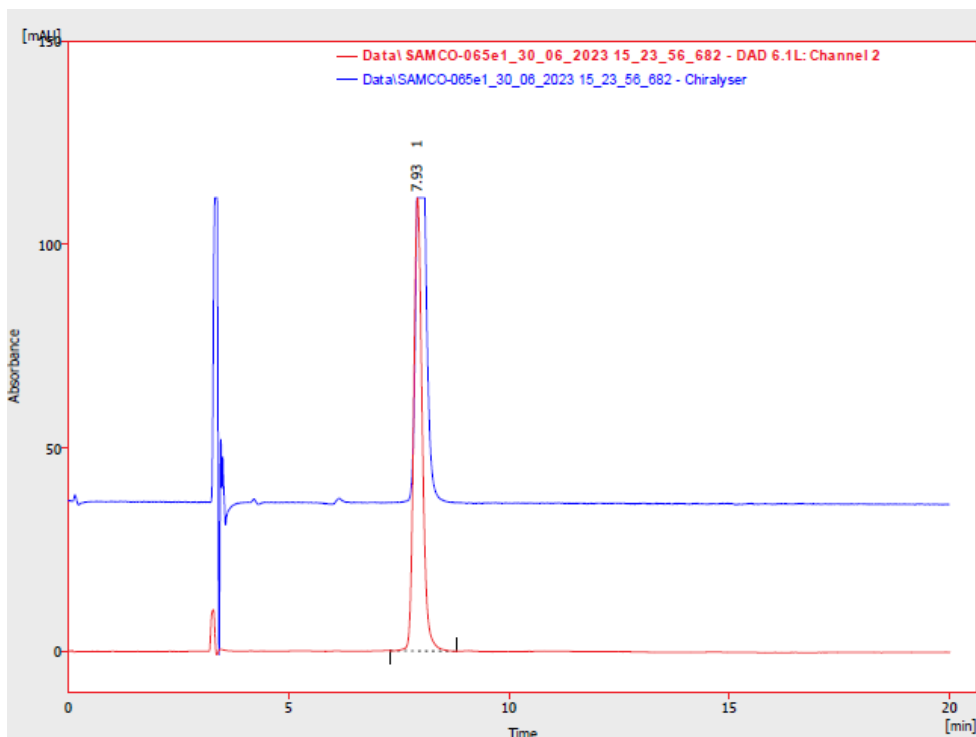

**Figure S26.** HPLC of (+)-(P)-7A (red: UV detector (350 nm), blue: downstream polarimetric detector).

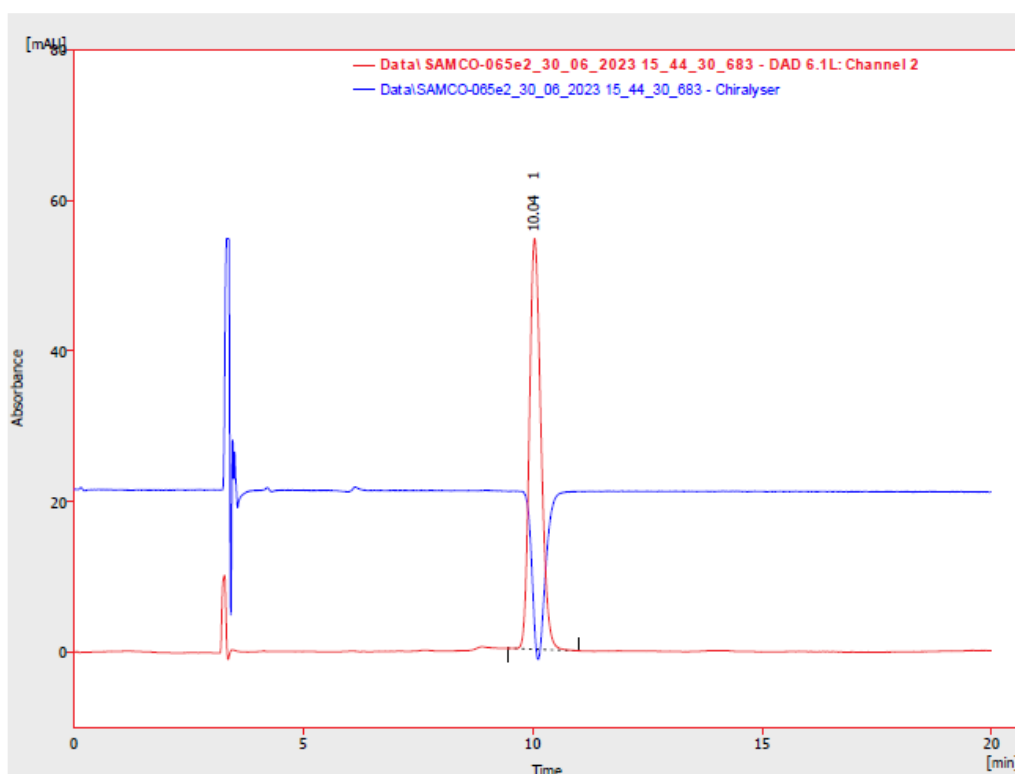

**Figure S27.** HPLC of (-)-(M)-7A (red: UV detector (350 nm), blue: downstream polarimetric detector).

## Chiral resolution of 8A

**Chiral HPLC separation:** *Anal.:* Chiralpak IE (250 x 4.6 mm, 5  $\mu$ m, DAICEL), toluene, 1% IPA @ 1.0 mL/min., 35  $^{\circ}$ C,  $t_{R}(+)$  = 7.6 min. (>99% ee),  $t_{R}(-)$  = 10.4 min. (>99% ee); *Semiprep.:* CHIRALPAK<sup>®</sup> IE (250 x 20 mm, 5  $\mu$ m, Chiral Technologies), toluene, 0.5% IPA @20 mL/min.

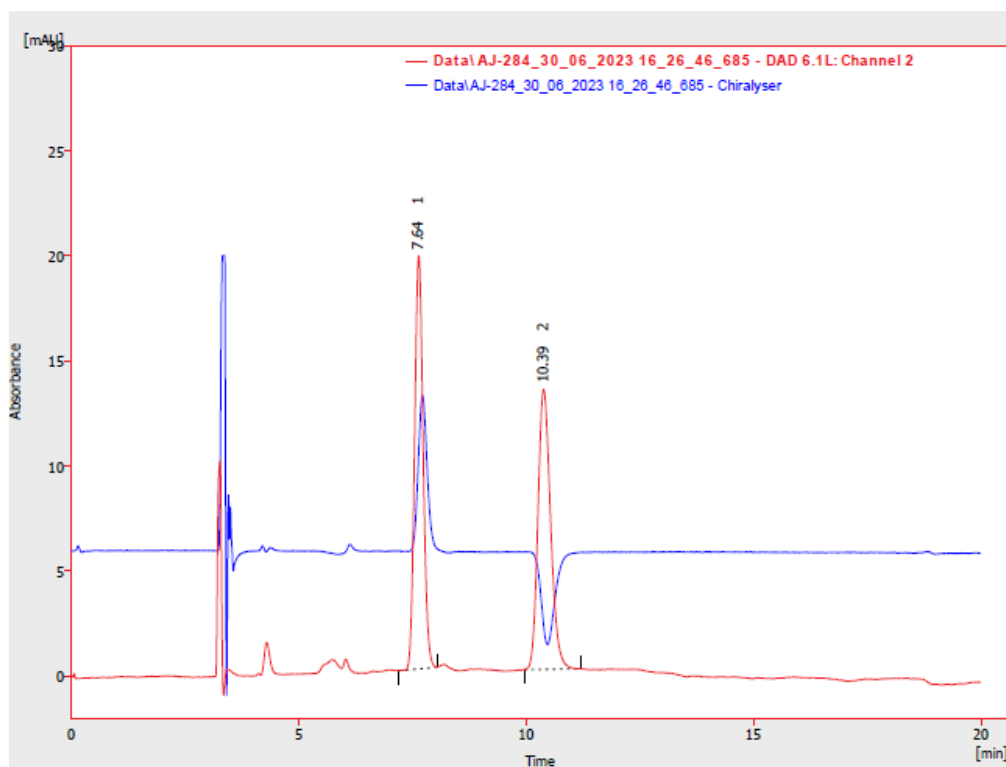

Result Table (Uncal - Data\AJ-284\_30\_06\_2023 16\_26\_46\_685 - DAD 6.1L: Channel 2)

|   | Reten. Time [min] | Area [mAU.s] | Height [mAU] | Area [%] | Height [%] | W05 [min] | PDA Peak Purity | Compound Name |
|---|-------------------|--------------|--------------|----------|------------|-----------|-----------------|---------------|
| 1 | 7.640             | 255.991      | 19.681       | 49.8     | 59.6       | 0.20      | 816             |               |
| 2 | 10.388            | 257.787      | 13.340       | 50.2     | 40.4       | 0.30      | 870             |               |
|   | Total             | 513.778      | 33.021       | 100.0    | 100.0      |           |                 |               |

**Figure S28.** HPLC of *rac*-8A (red: UV detector (350 nm), blue: downstream polarimetric detector).

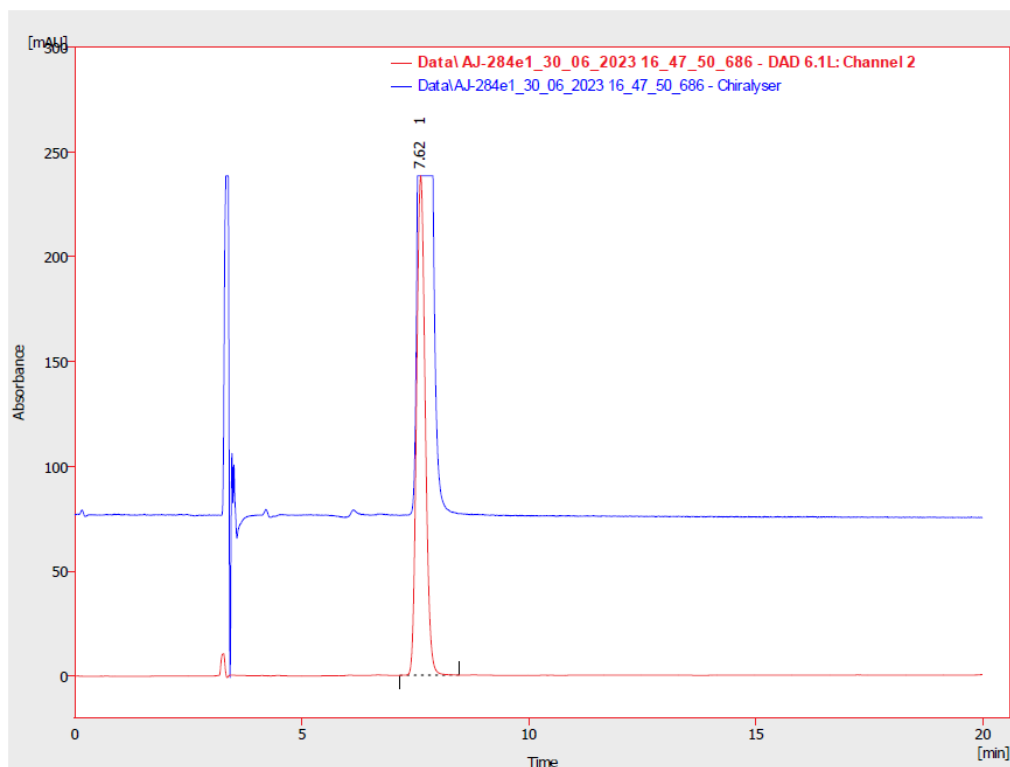

**Figure S29.** HPLC of (+)-(*P*)-**8A** (red: UV detector (350 nm), blue: downstream polarimetric detector).

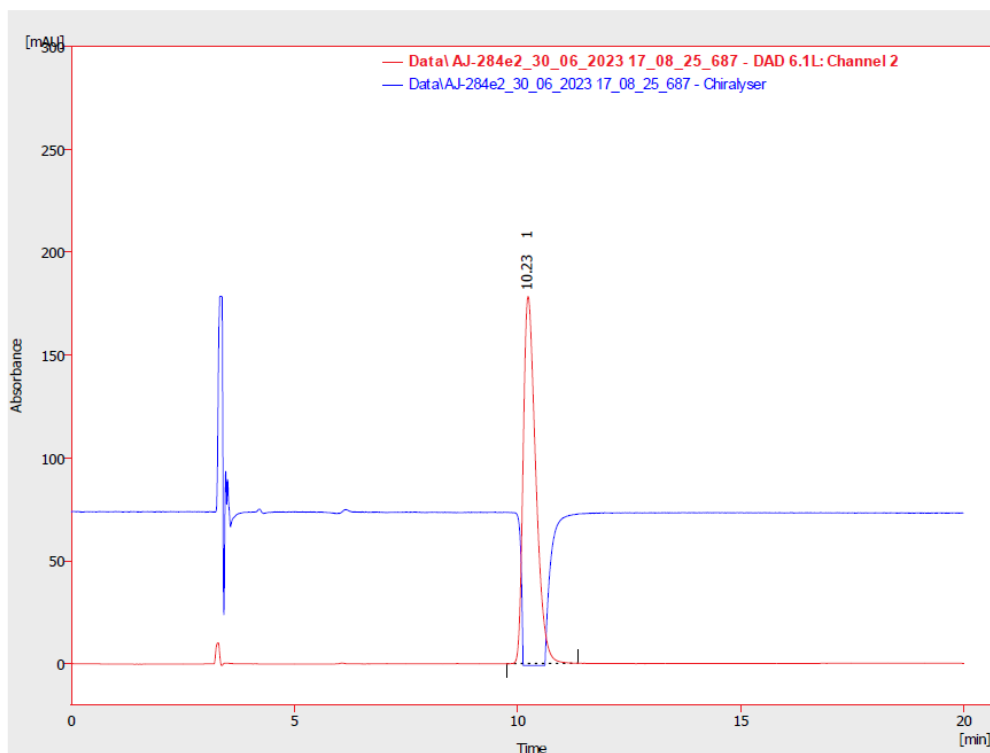

**Figure S30.** HPLC of (-)-(*M*)-**8A** (red: UV detector (350 nm), blue: downstream polarimetric detector).

# <sup>1</sup>H and <sup>13</sup>C NMR spectra of 1–54

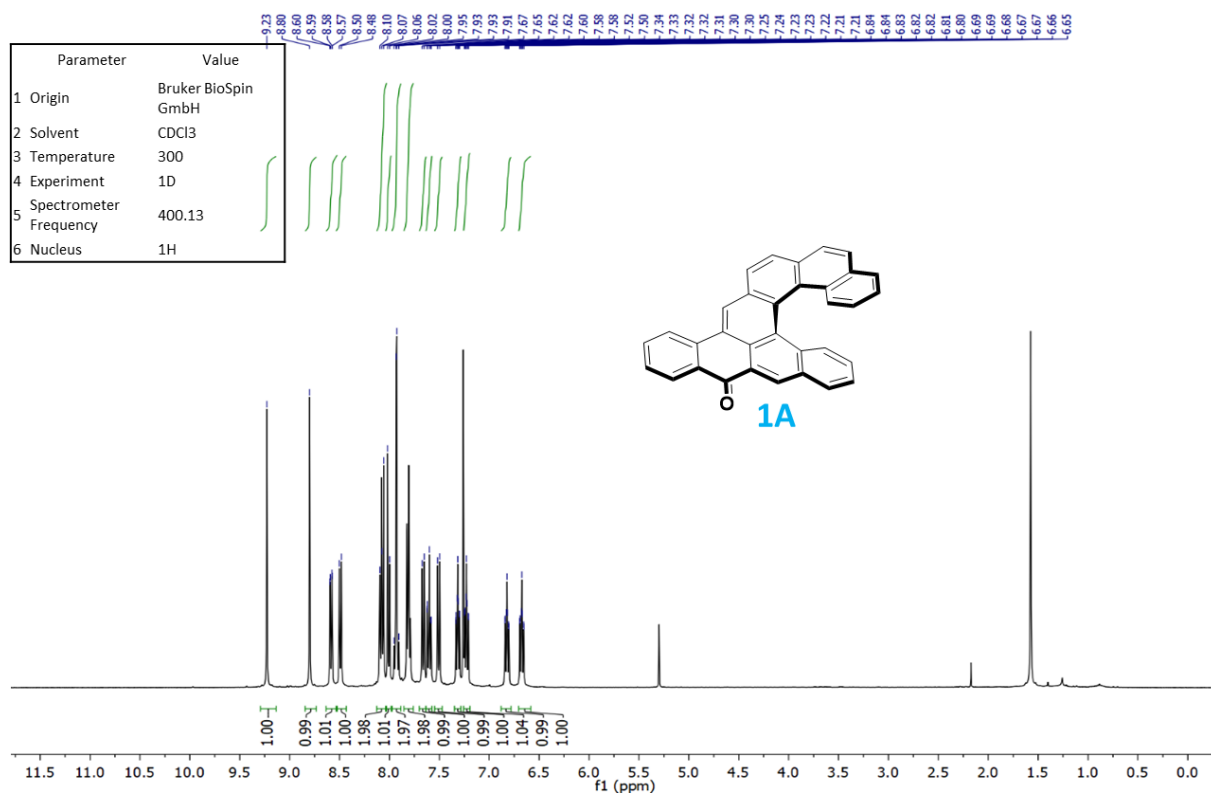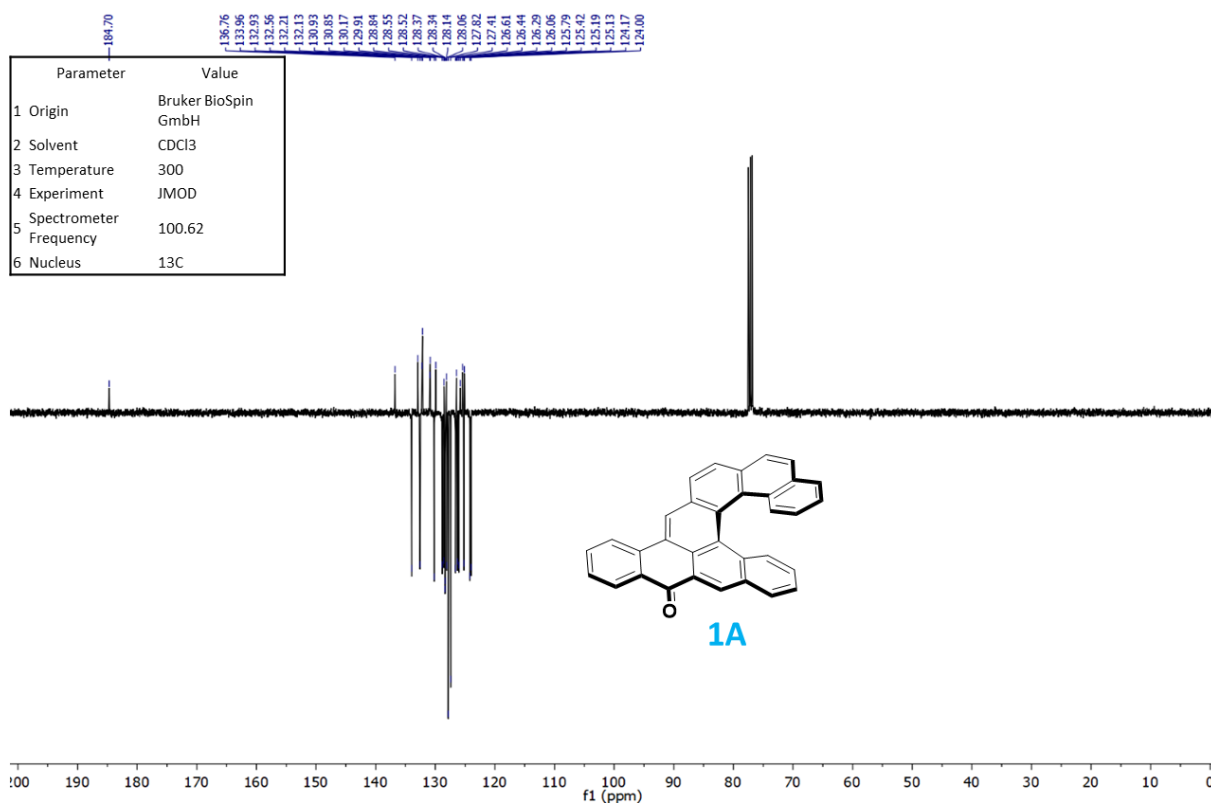

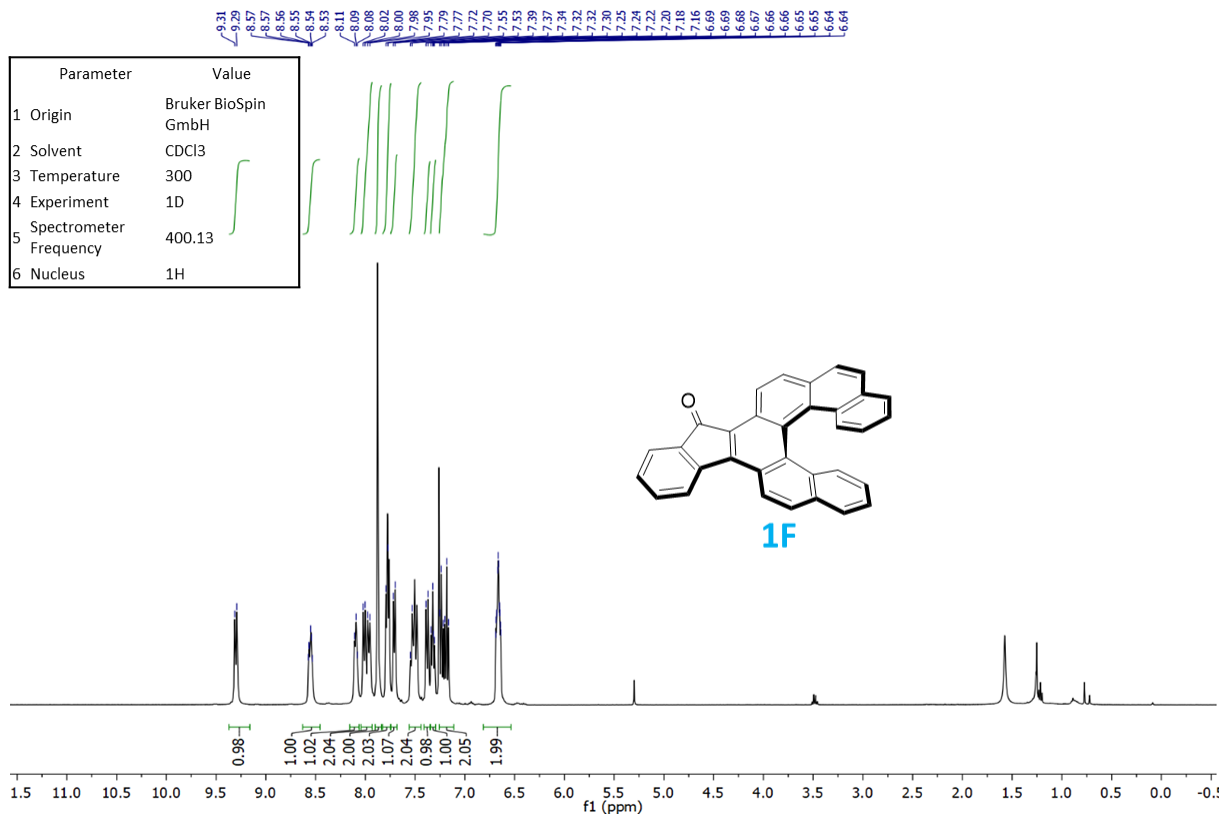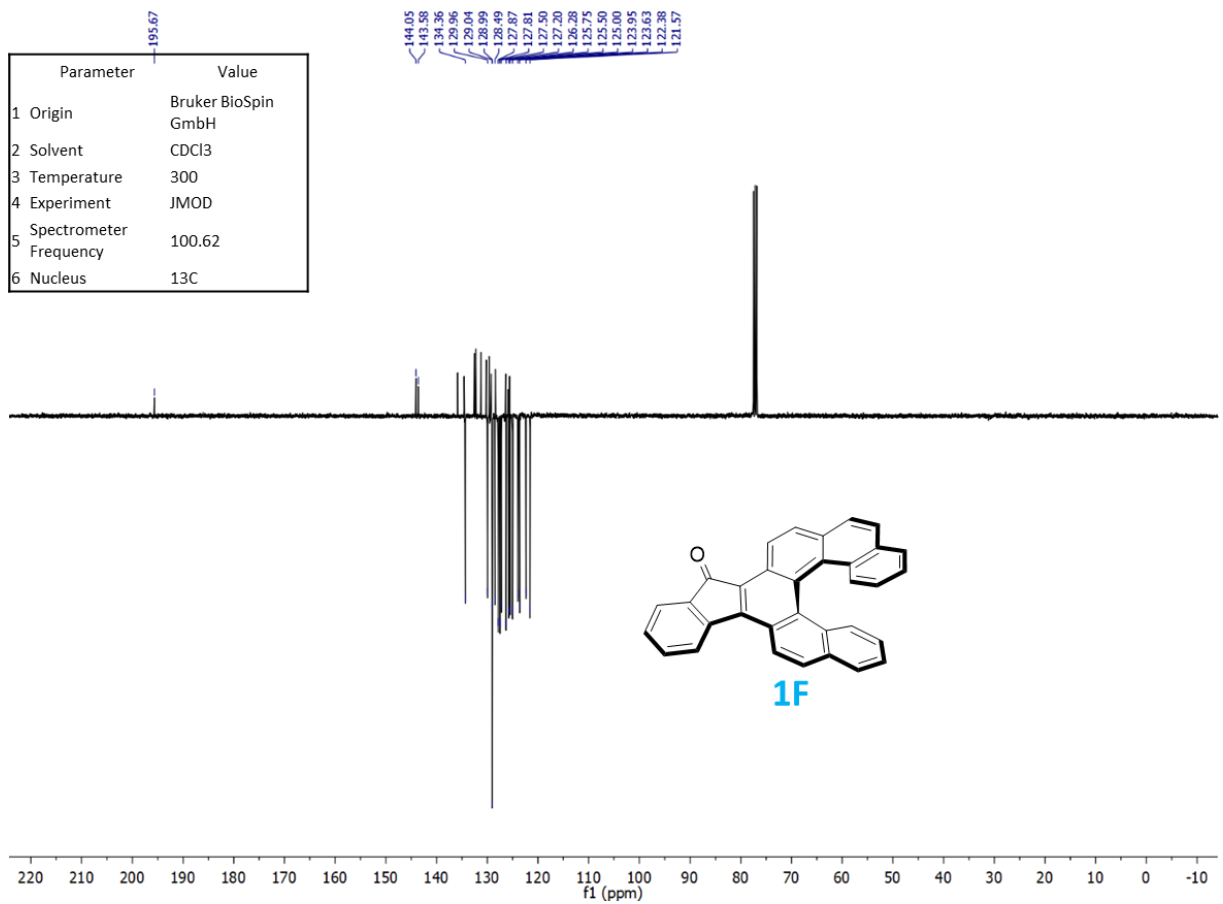

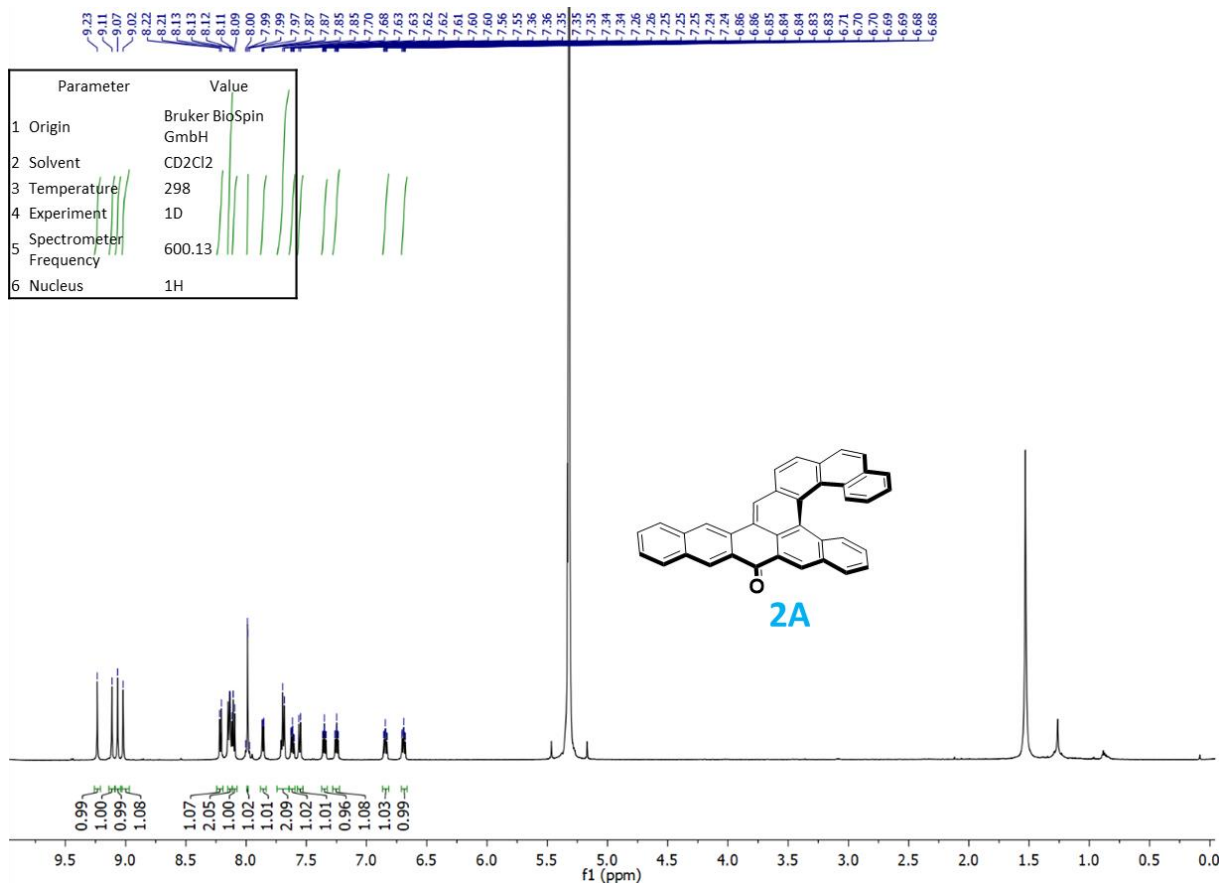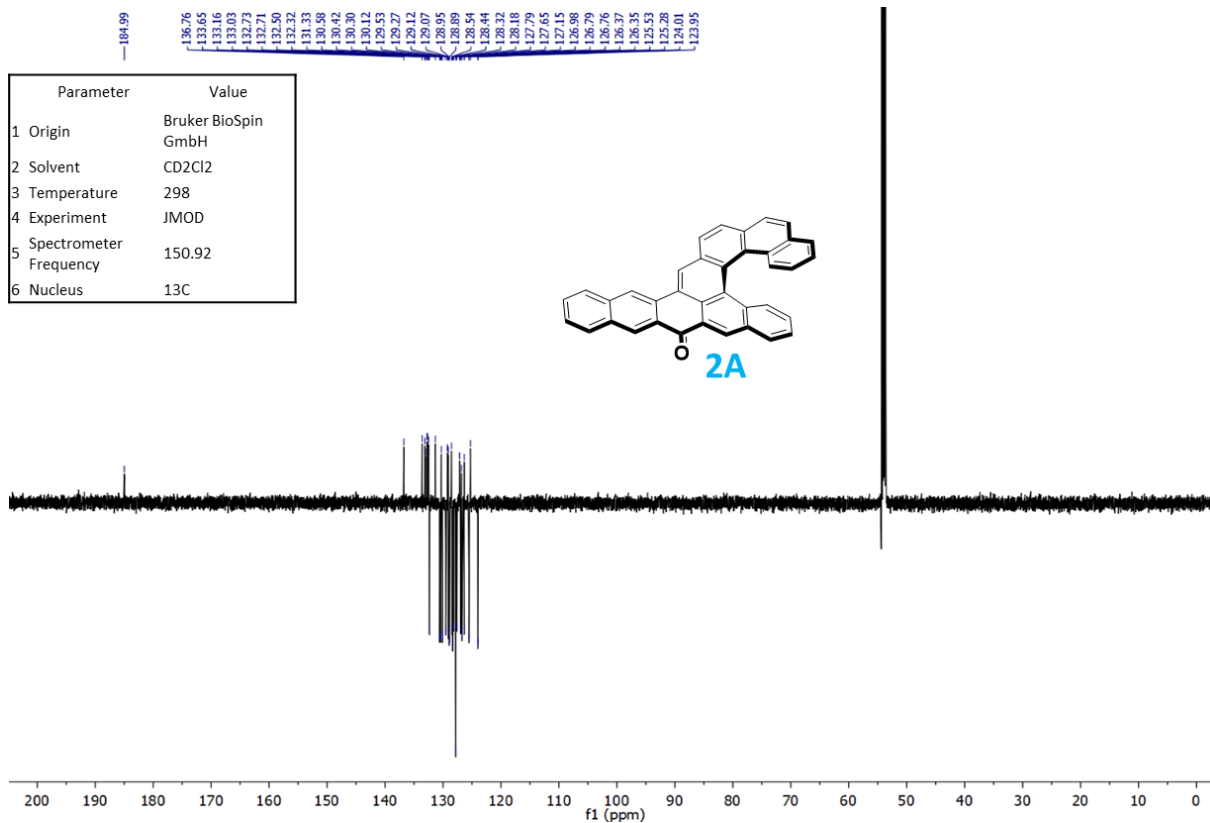



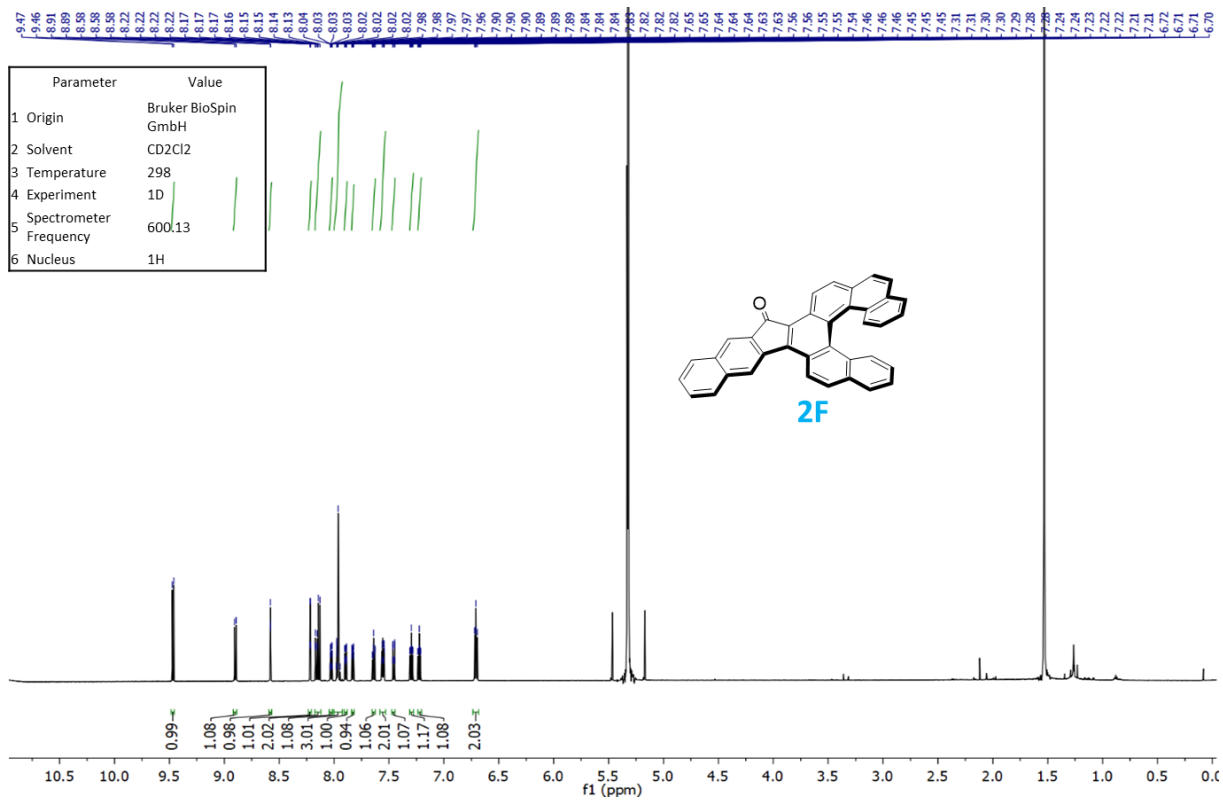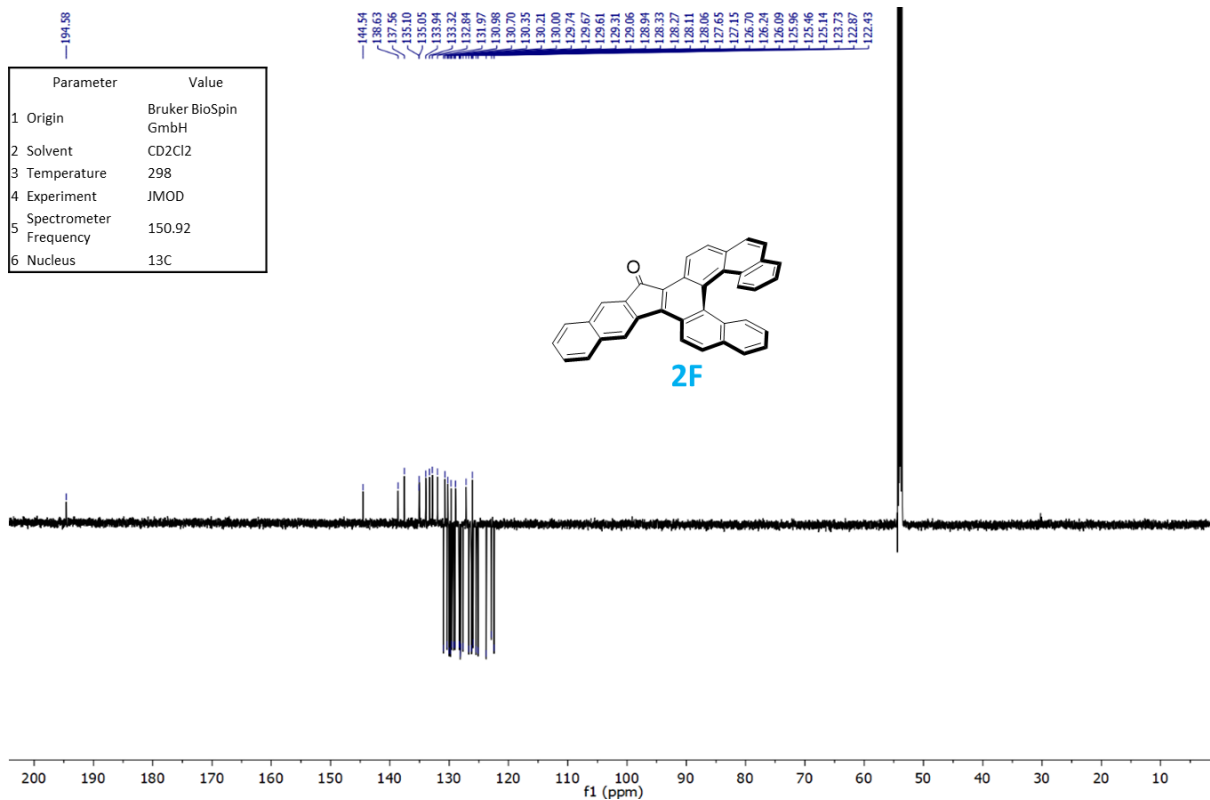

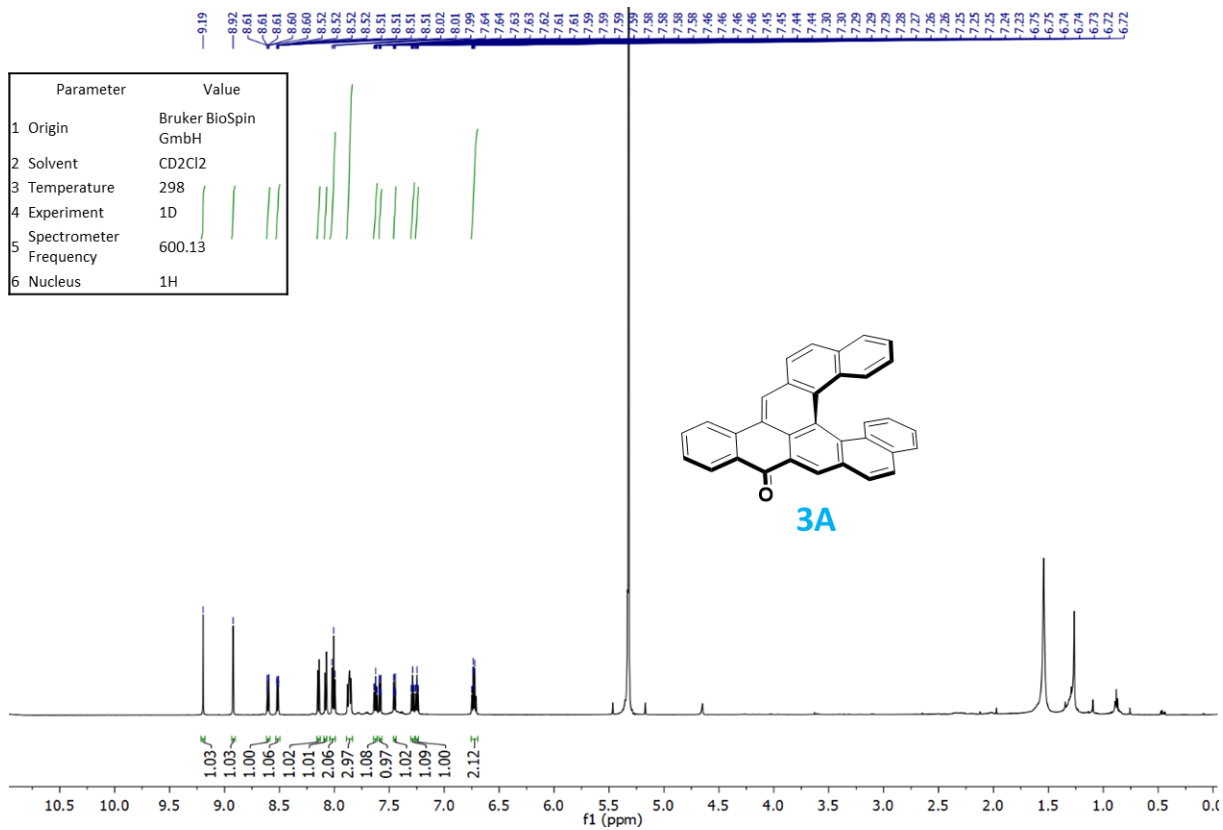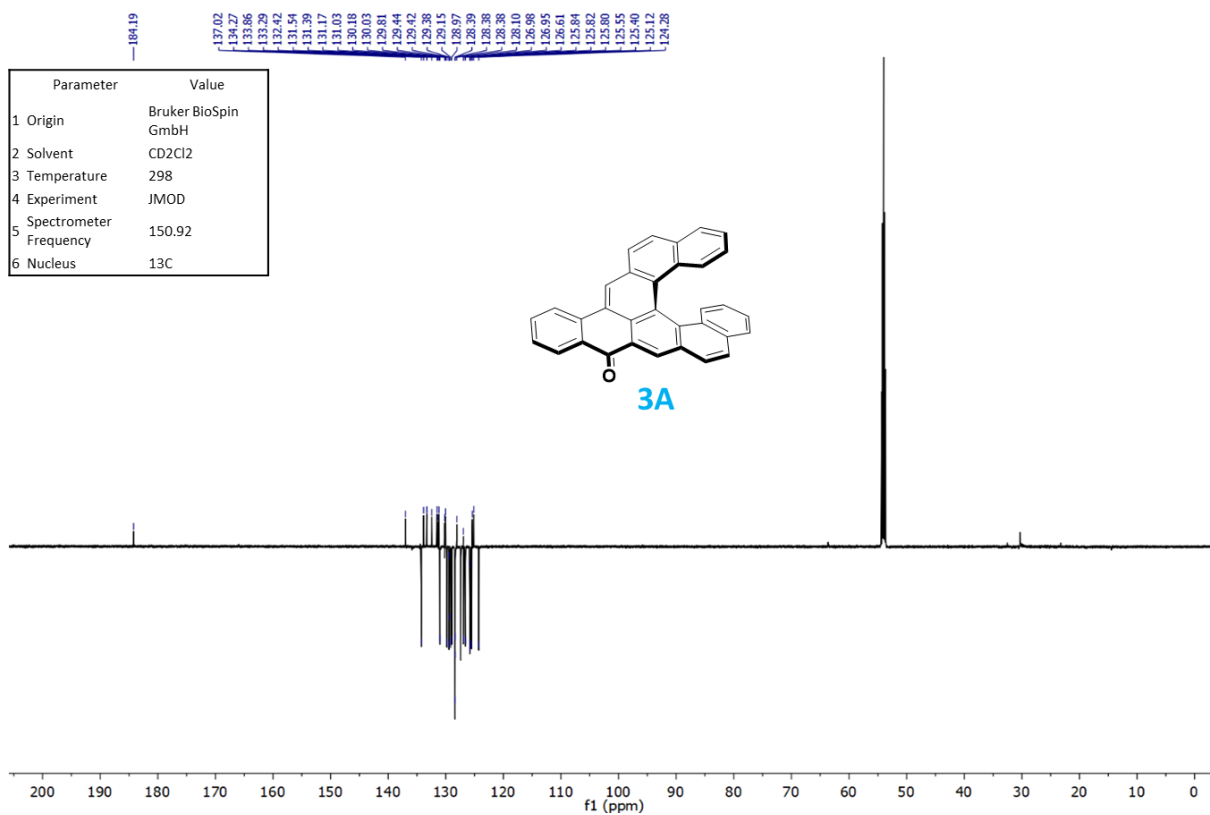

| Parameter      | Value               |
|----------------|---------------------|
| 1 Origin       | Bruker BioSpin GmbH |
| 2 Solvent      | CDCl3               |
| 3 Temperature  | 300                 |
| 4 Experiment   | 1D                  |
| 5 Spectrometer | 400.13              |
| 6 Nucleus      | 1H                  |

9.26  
9.23  
8.58  
8.56  
8.05  
8.03  
7.97  
7.95  
7.86  
7.84  
7.79  
7.77  
7.74  
7.71  
7.69  
7.52  
7.51  
7.50  
7.50  
7.48  
7.46  
7.44  
7.44  
7.32  
7.30  
7.30  
7.20  
7.20  
7.18  
7.18  
6.71  
6.70  
6.69  
6.69  
6.68  
6.67  
6.65  
6.63  
6.63  
6.61  
6.61

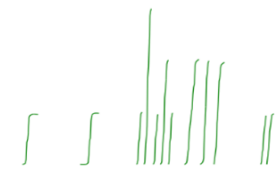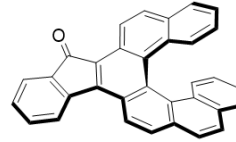

3F

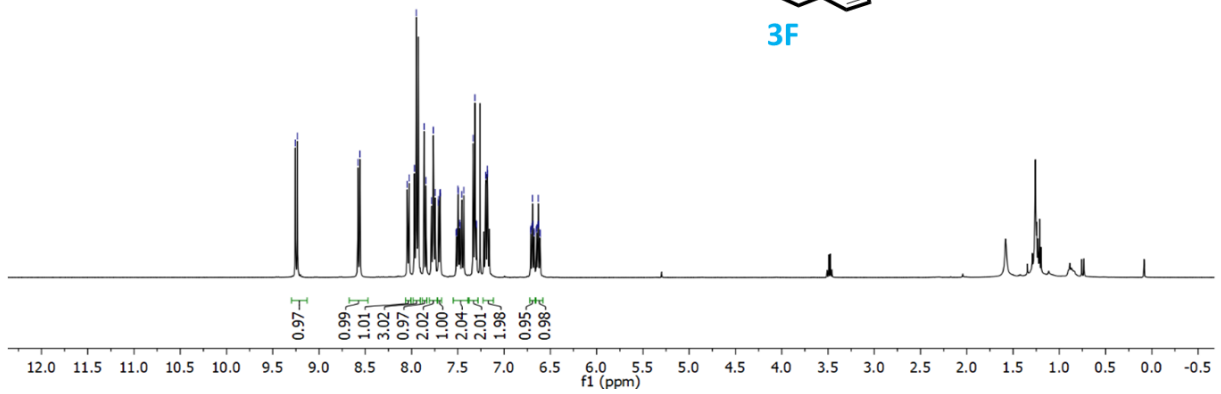

| Parameter      | Value               |
|----------------|---------------------|
| 1 Origin       | Bruker BioSpin GmbH |
| 2 Solvent      | CDCl3               |
| 3 Temperature  | 300                 |
| 4 Experiment   | JMOD                |
| 5 Spectrometer | 100.62              |
| 6 Nucleus      | 13C                 |

195.57

144.05  
143.15  
135.73  
134.33  
132.29  
132.11  
131.88  
130.41  
130.20  
130.17  
129.80  
129.74  
129.73  
129.01  
128.85  
128.47  
128.32  
127.88  
127.76  
127.74  
127.67  
127.45  
126.15  
126.07  
125.76  
125.44  
125.27  
123.92  
123.49  
122.98  
121.75

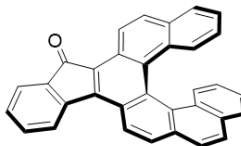

3F

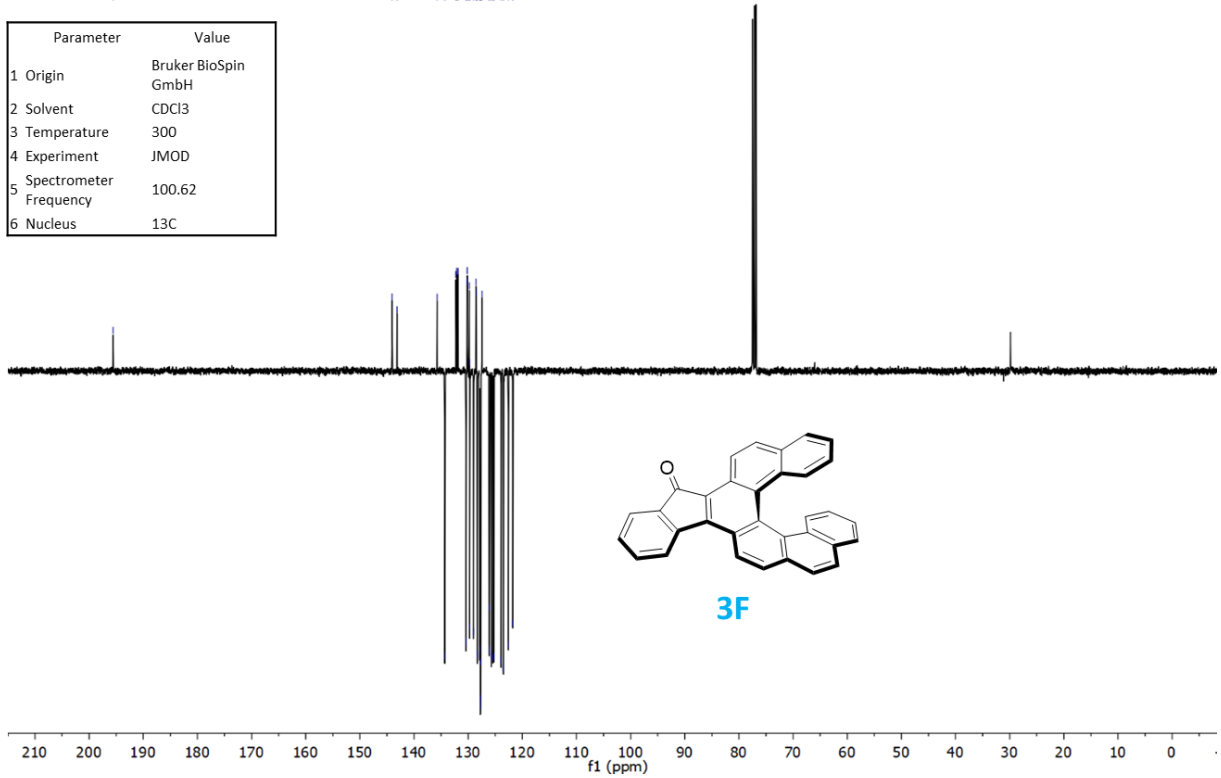

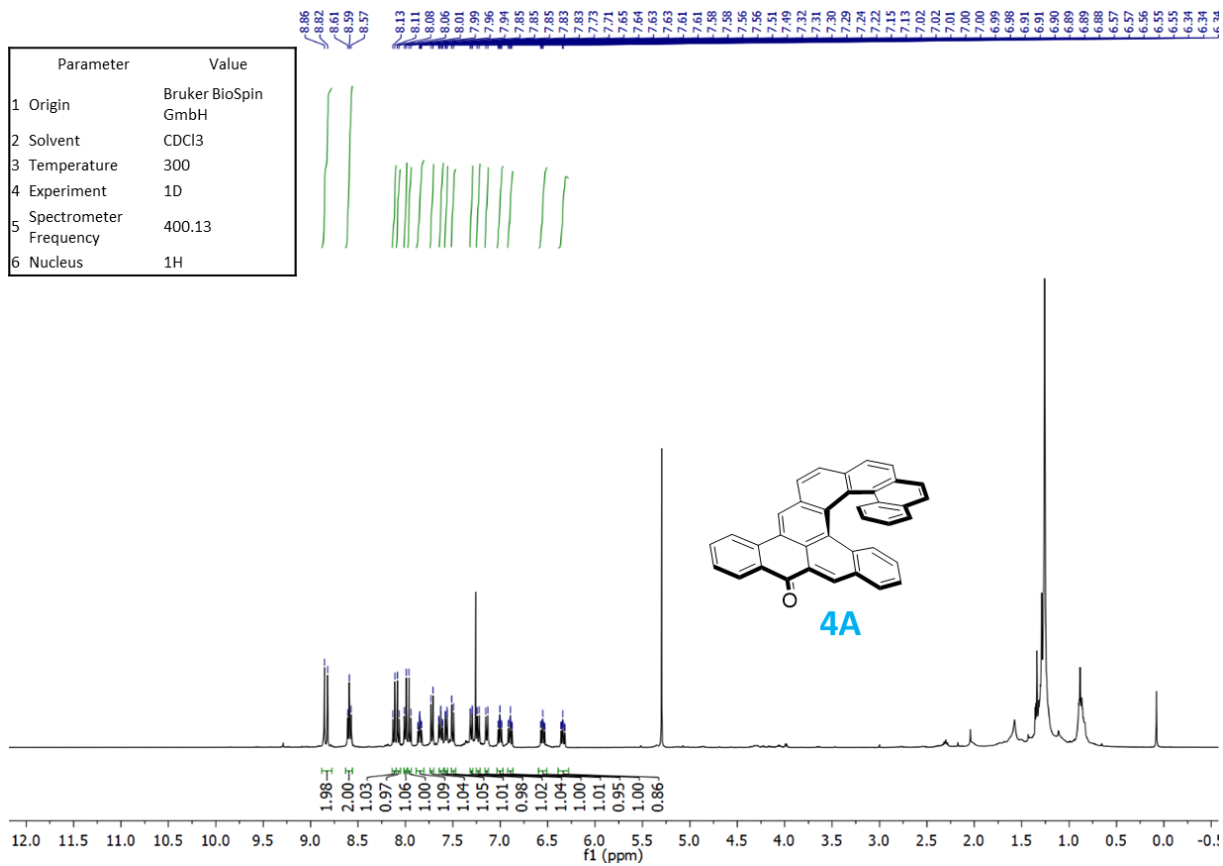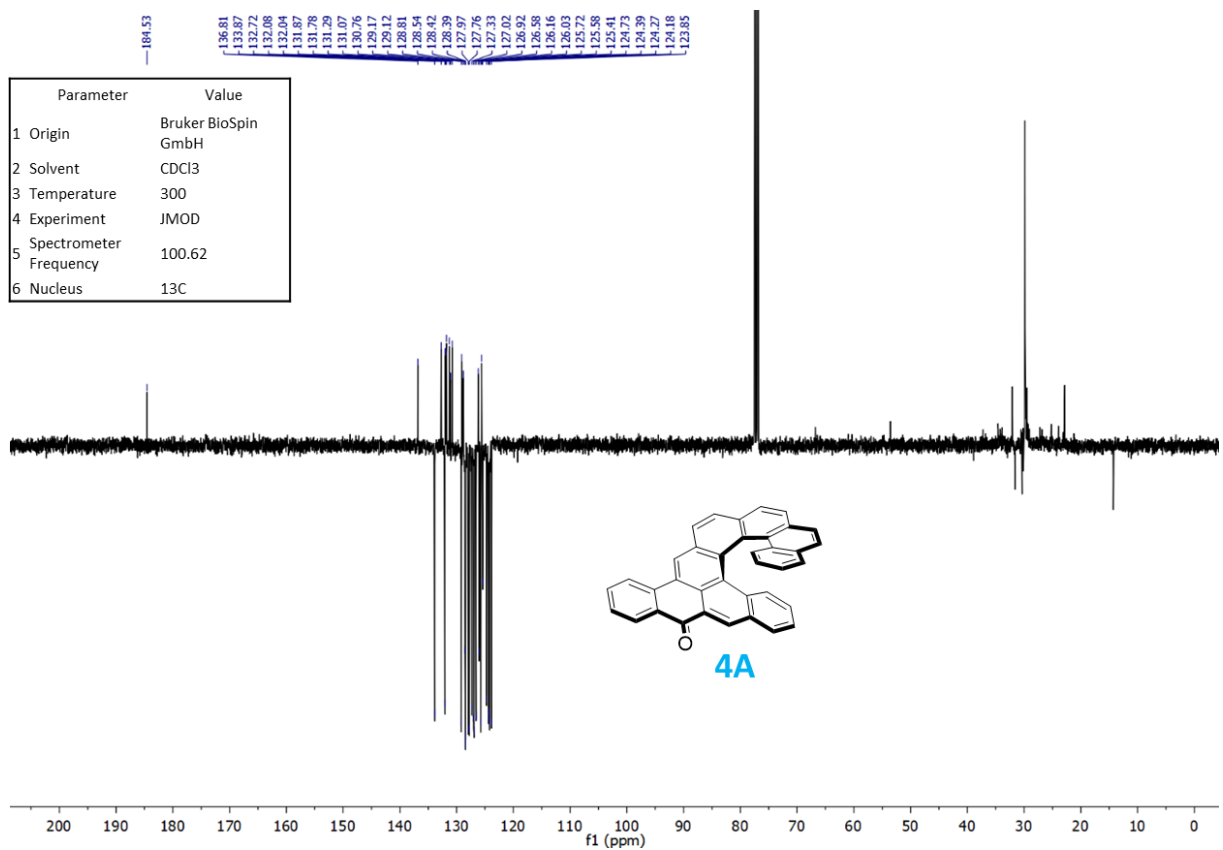

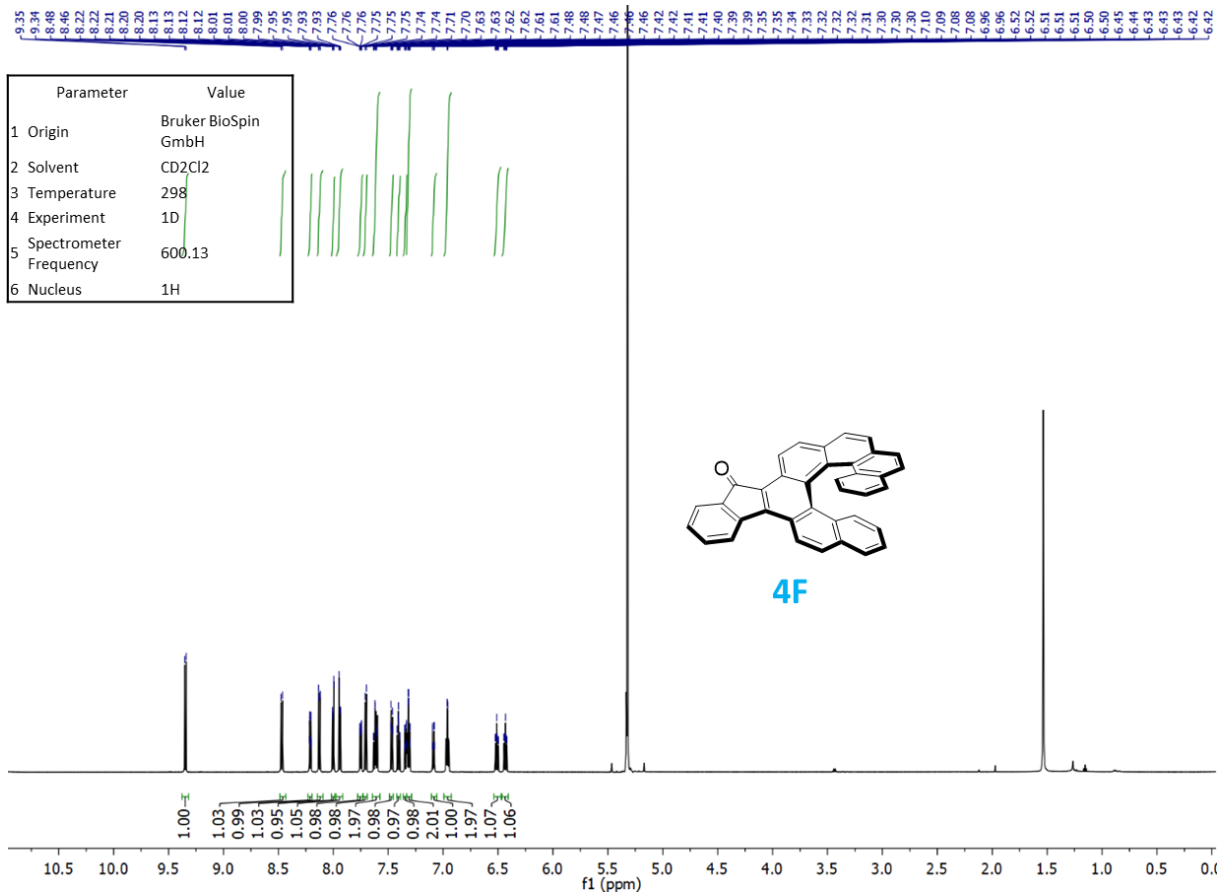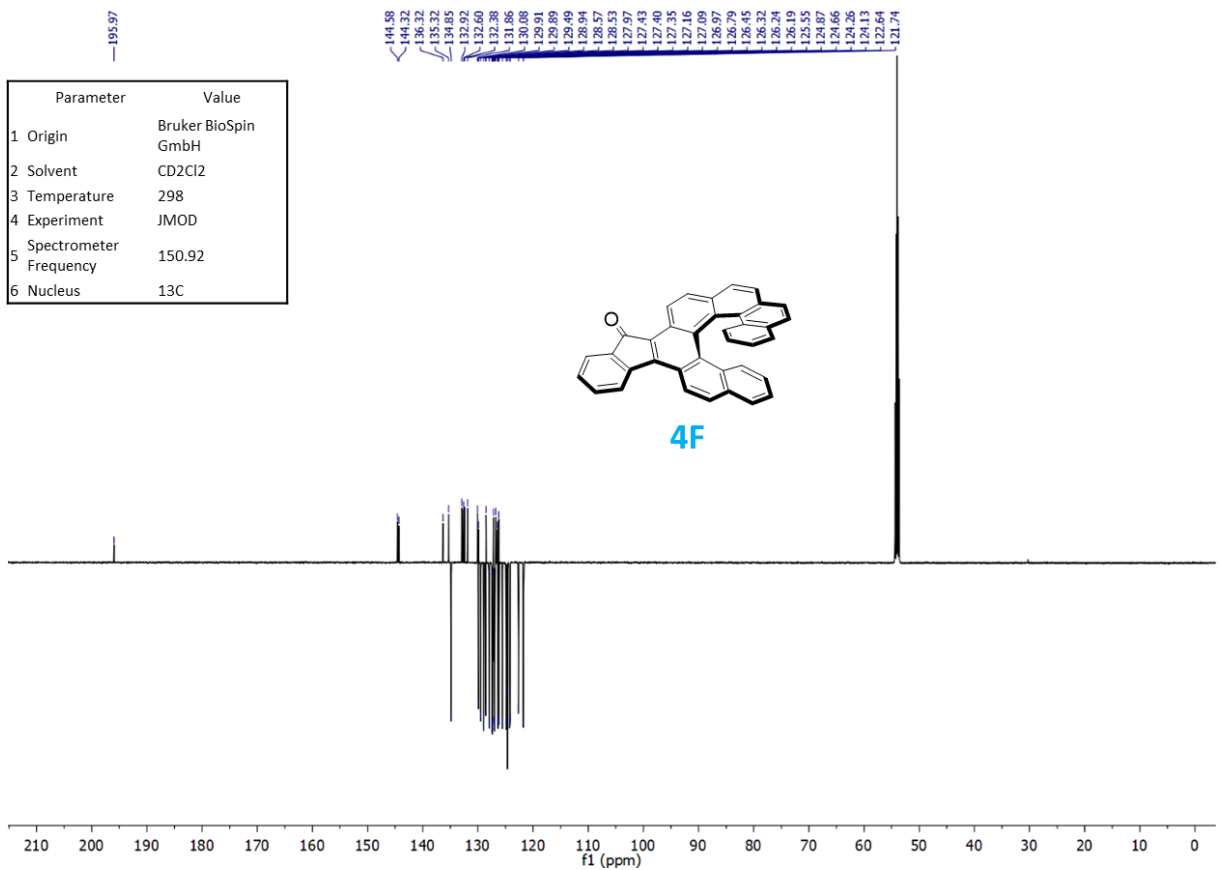

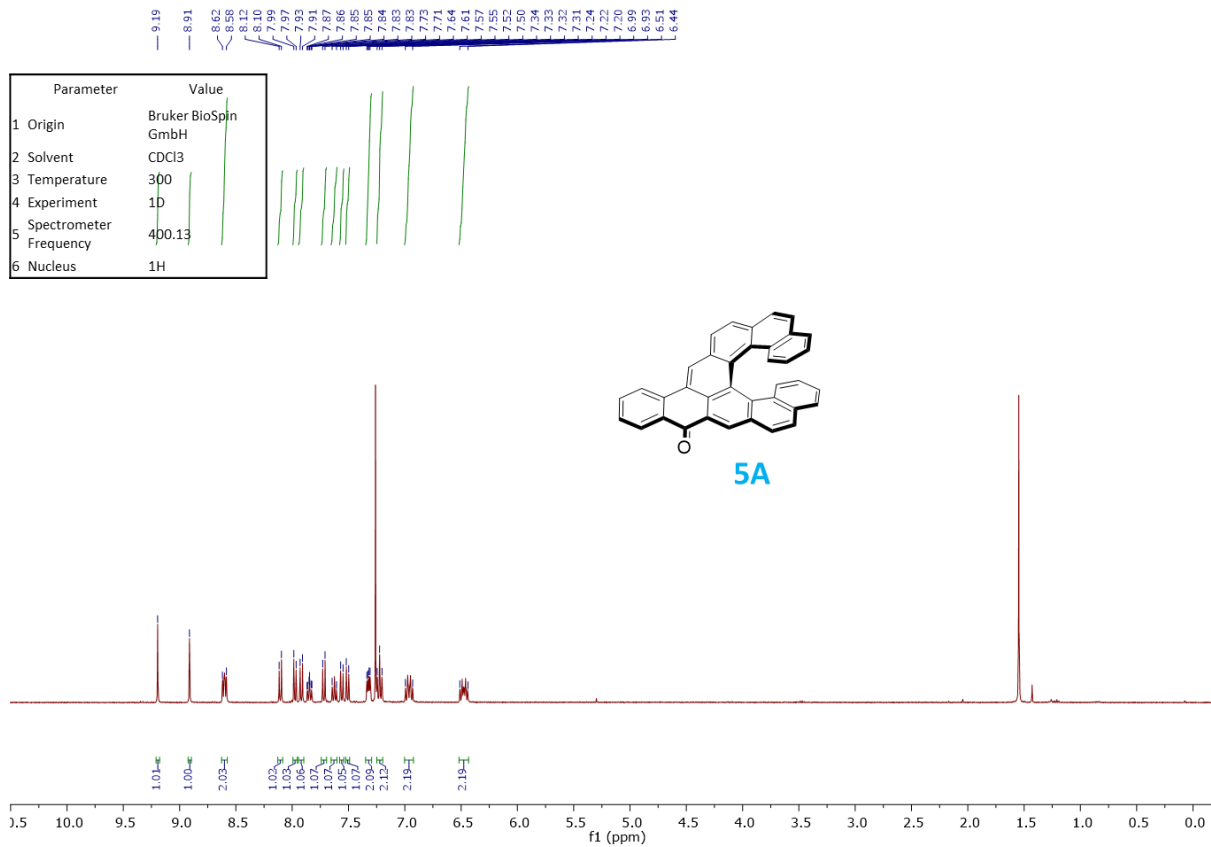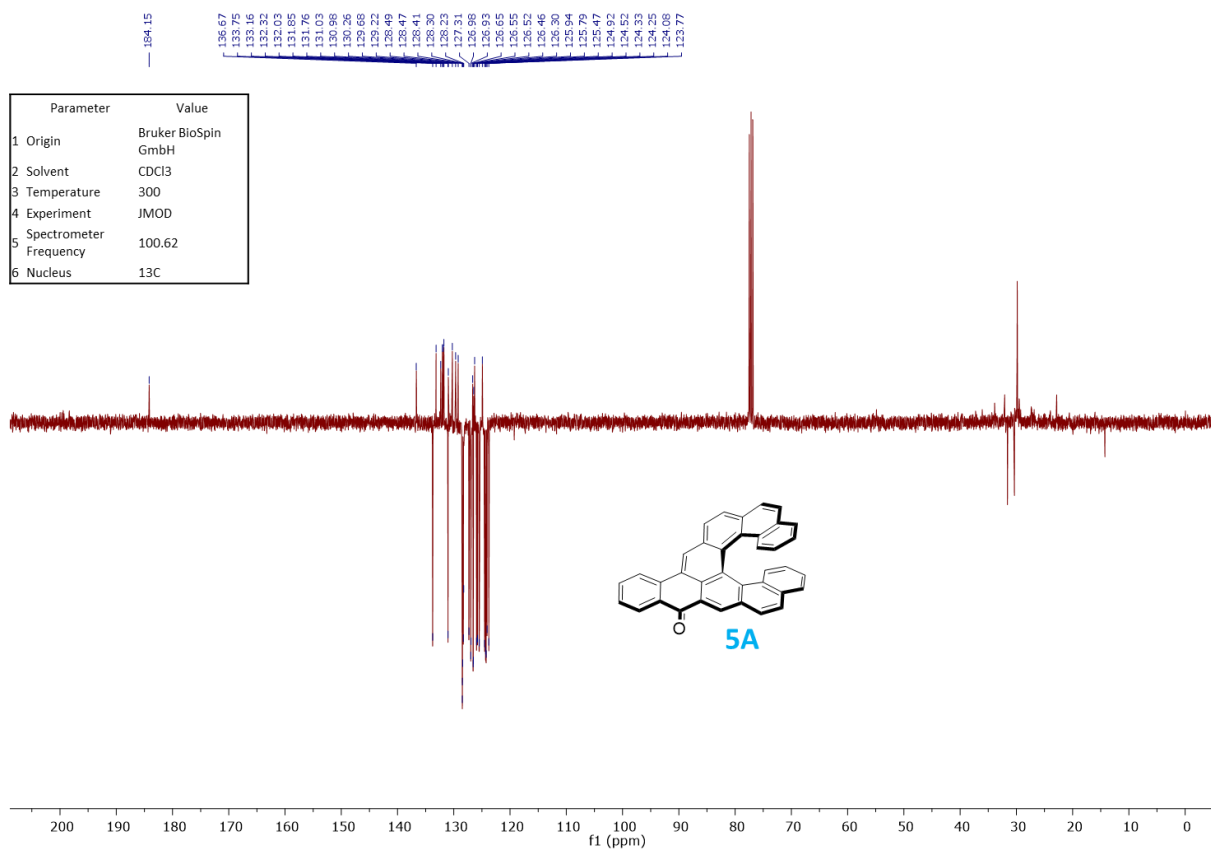

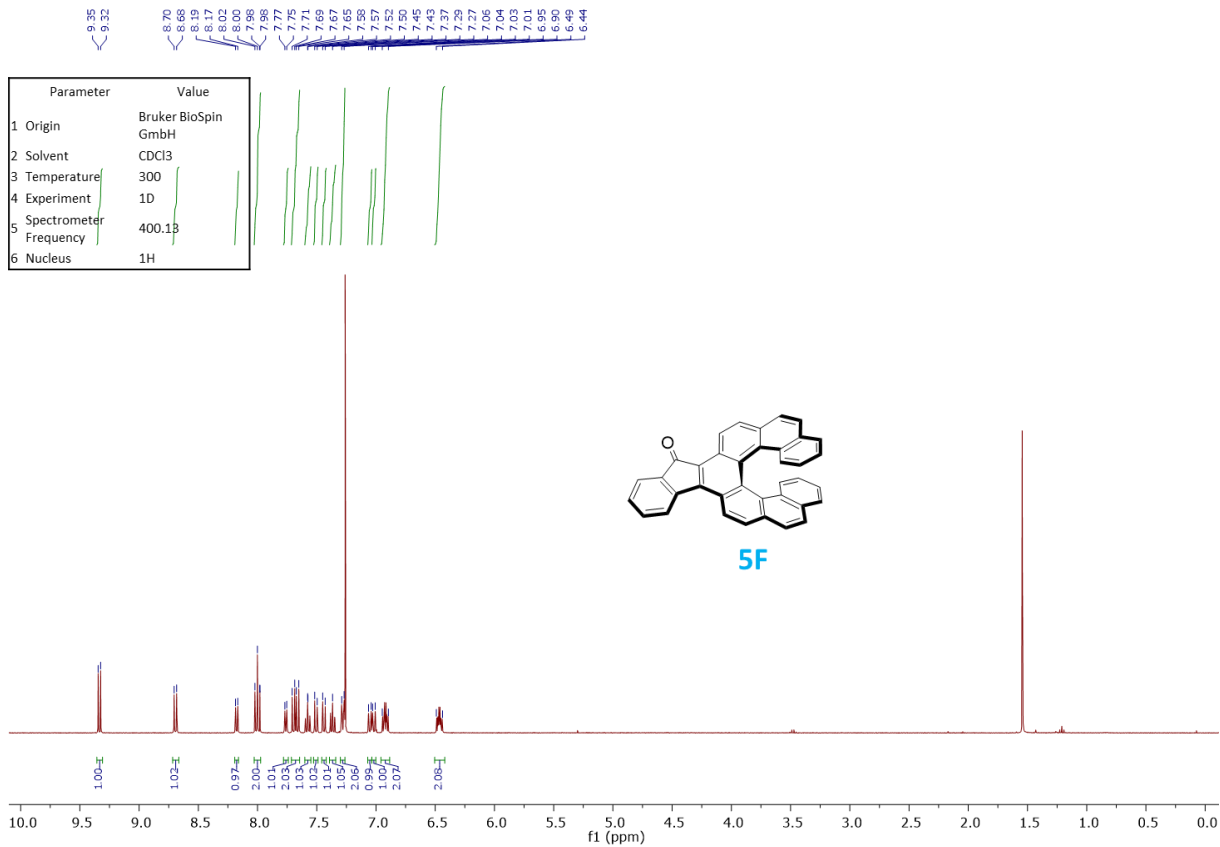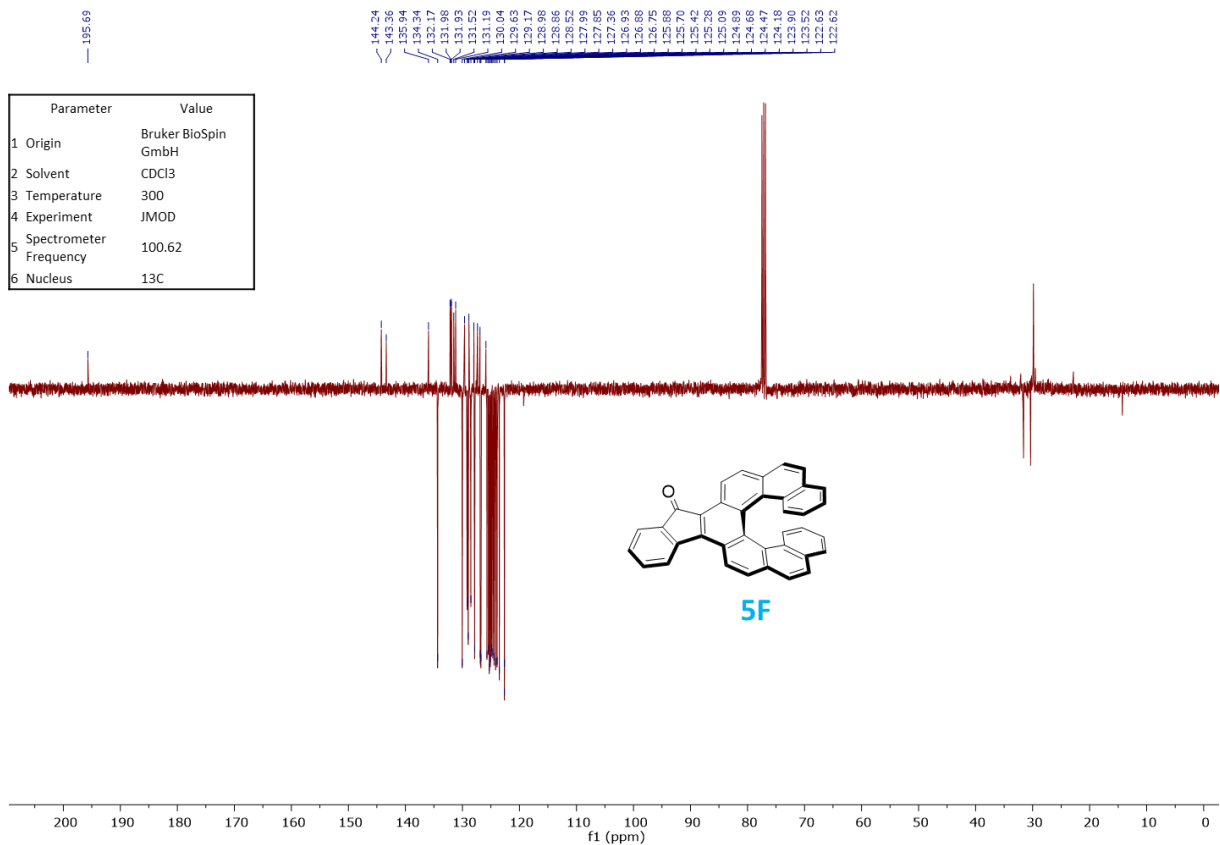

AJ272\_F2.1.fid

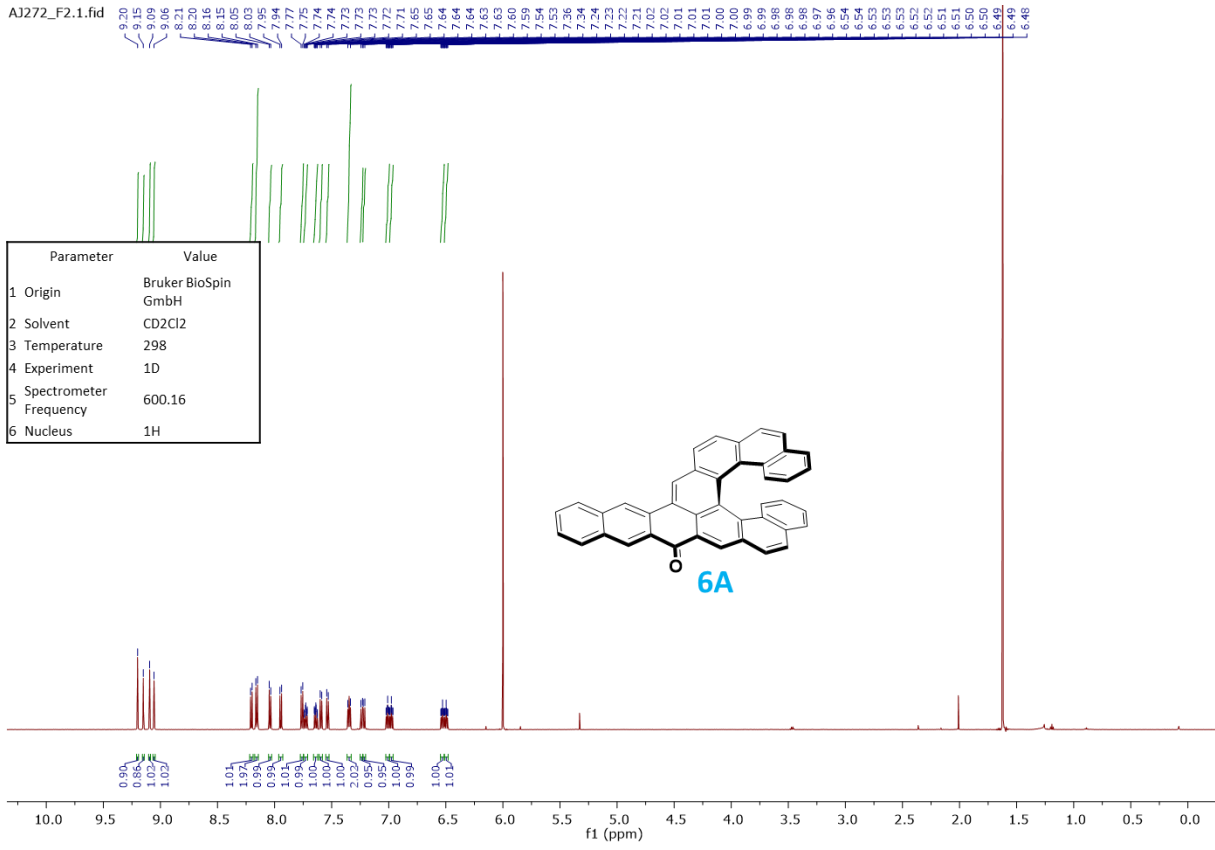

AJ272\_F2.2.fid

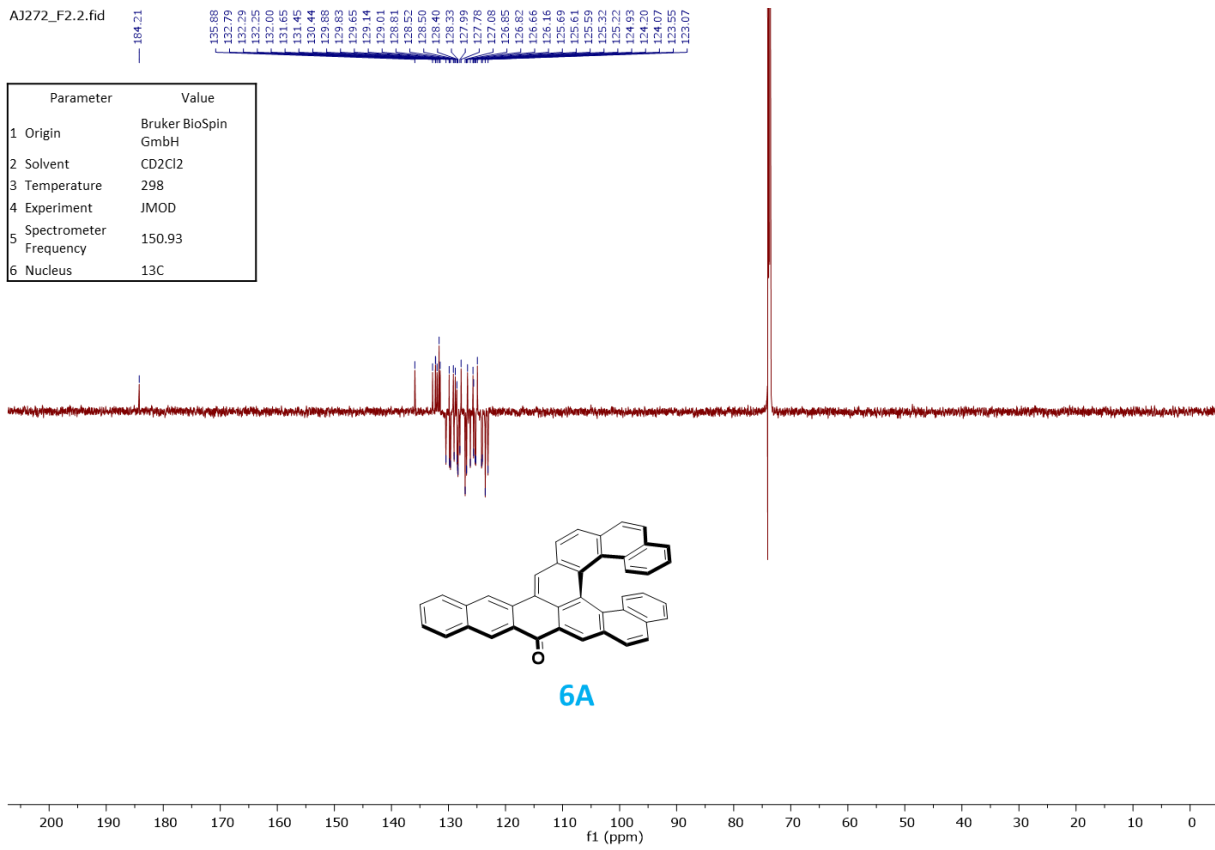



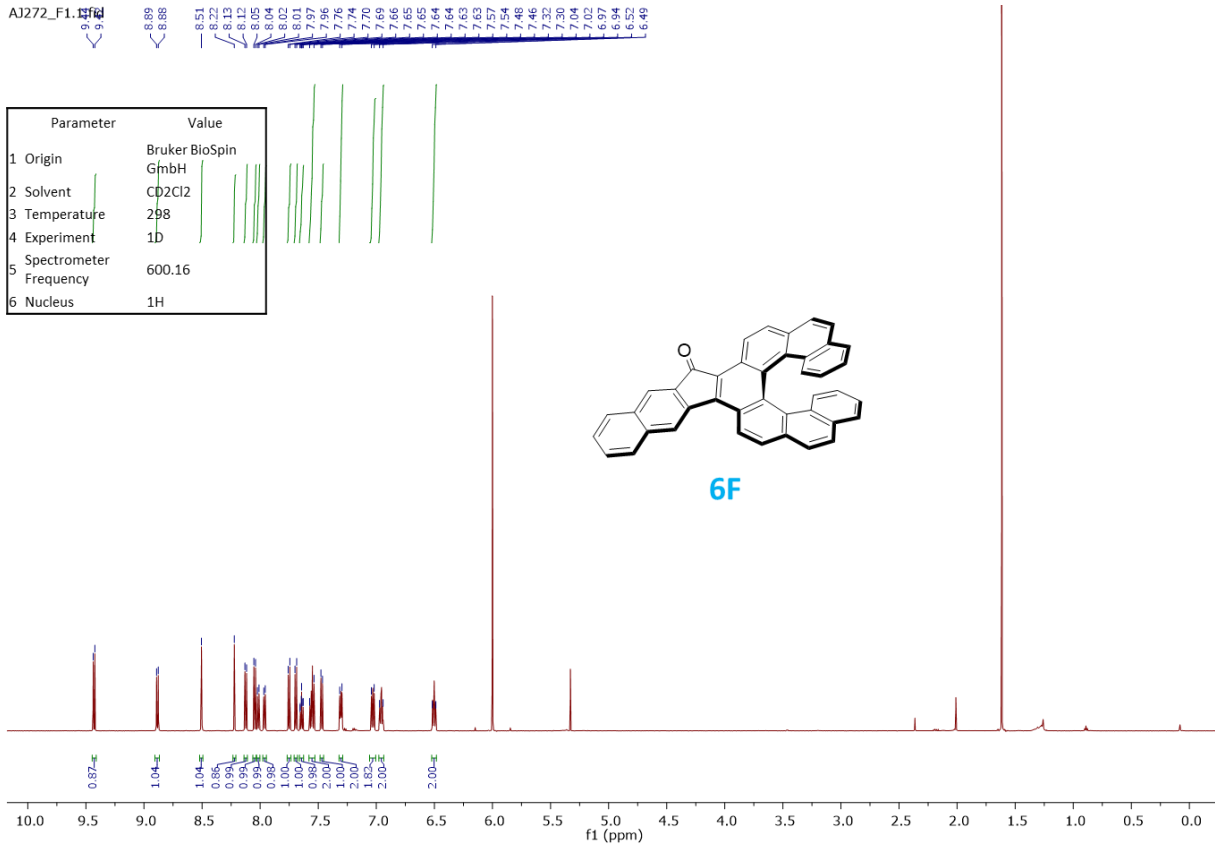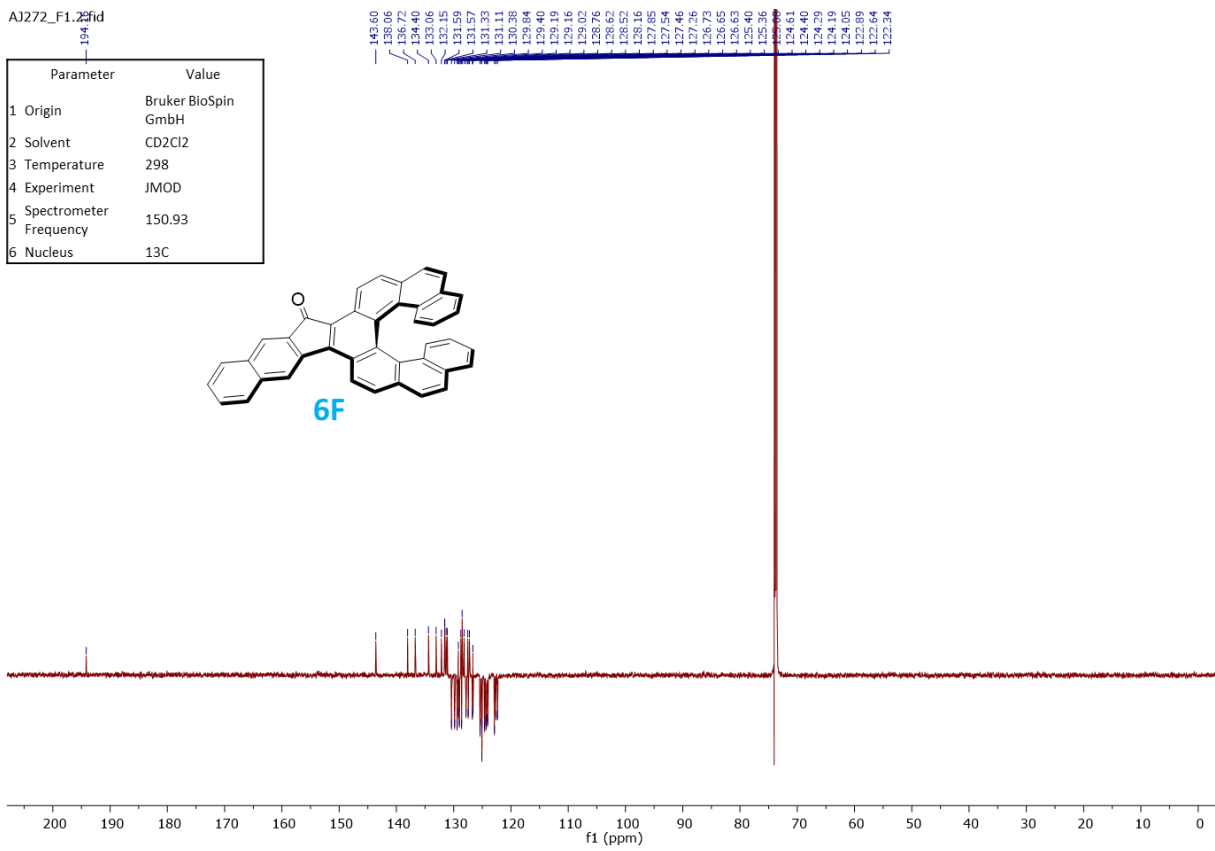

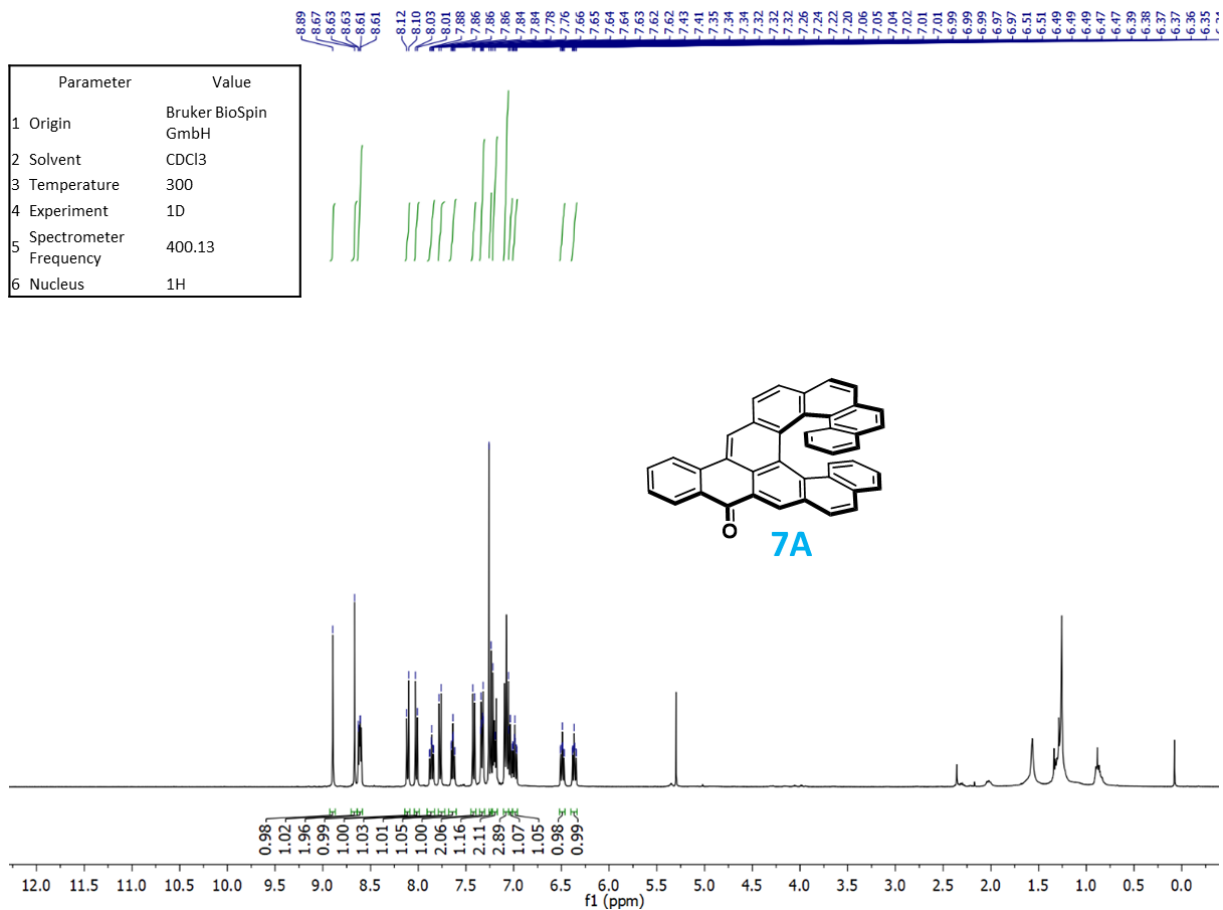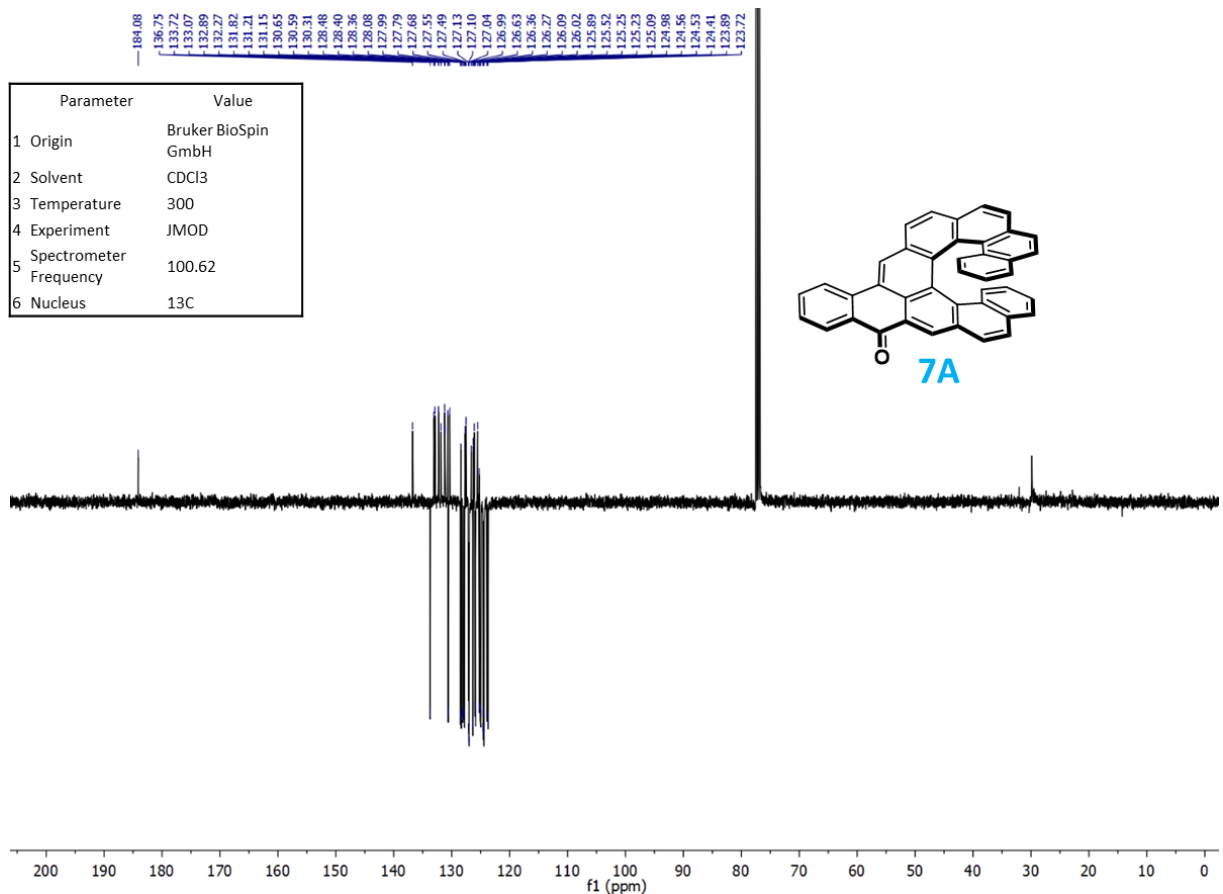

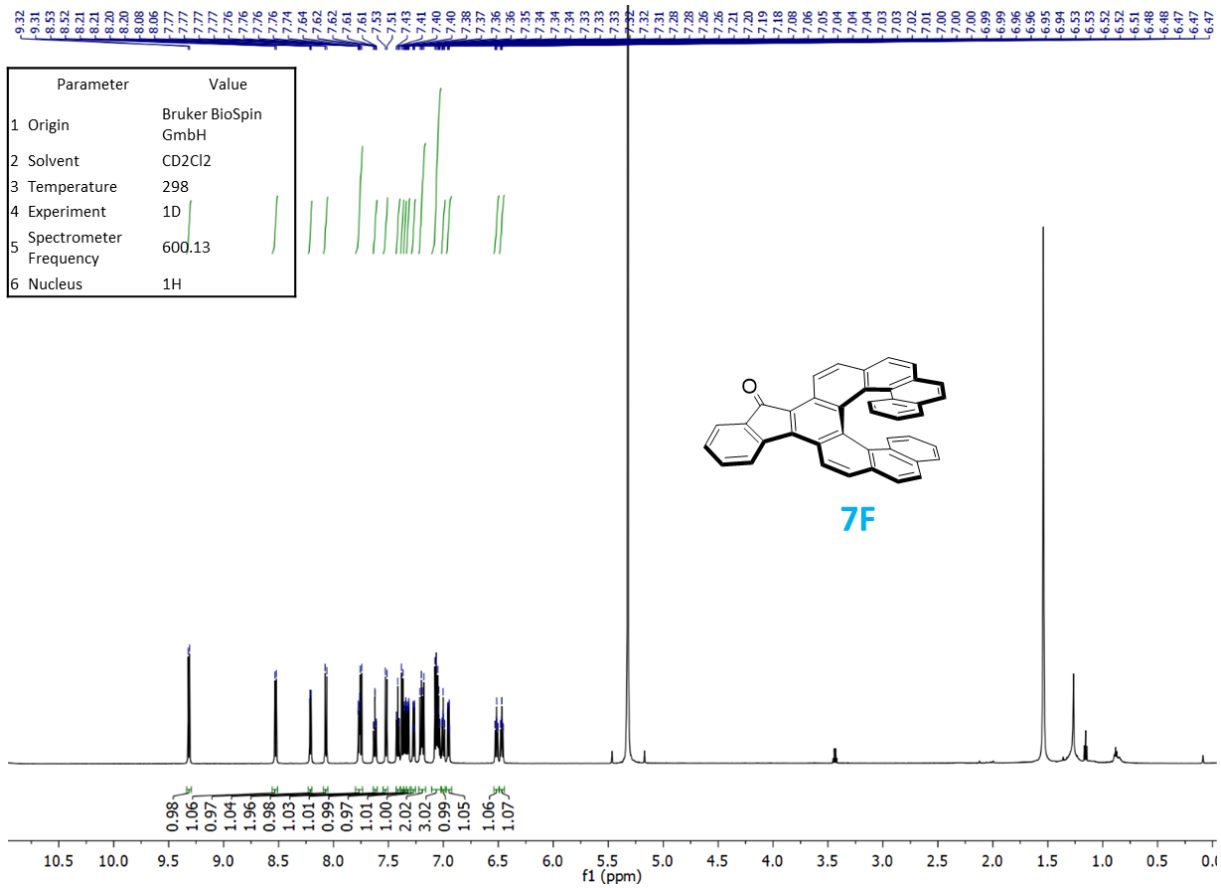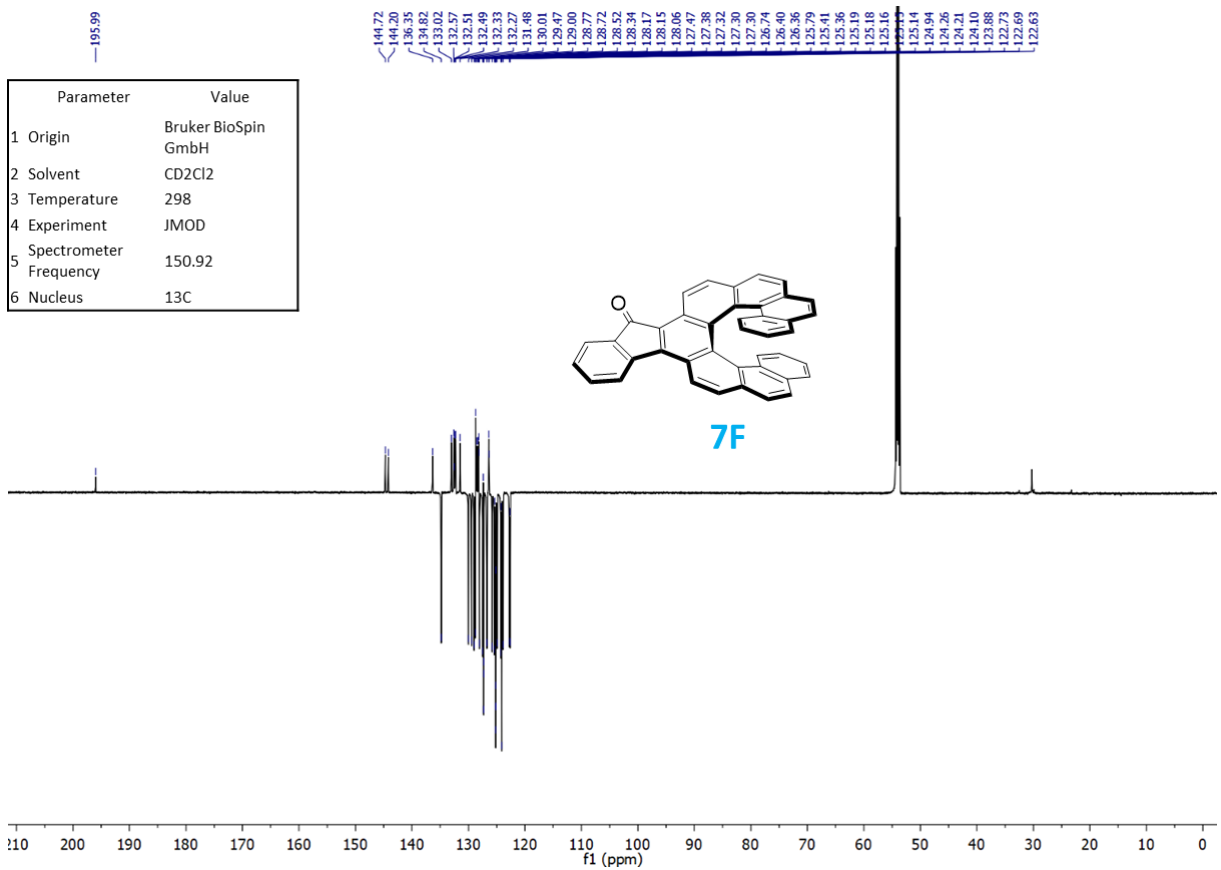

AJ284\_F2.1.fid

| Parameter                | Value               |
|--------------------------|---------------------|
| 1 Origin                 | Bruker BioSpin GmbH |
| 2 Solvent                | CD2Cl2              |
| 3 Temperature            | 298                 |
| 4 Experiment             | 1D                  |
| 5 Spectrometer Frequency | 600.16              |
| 6 Nucleus                | 1H                  |

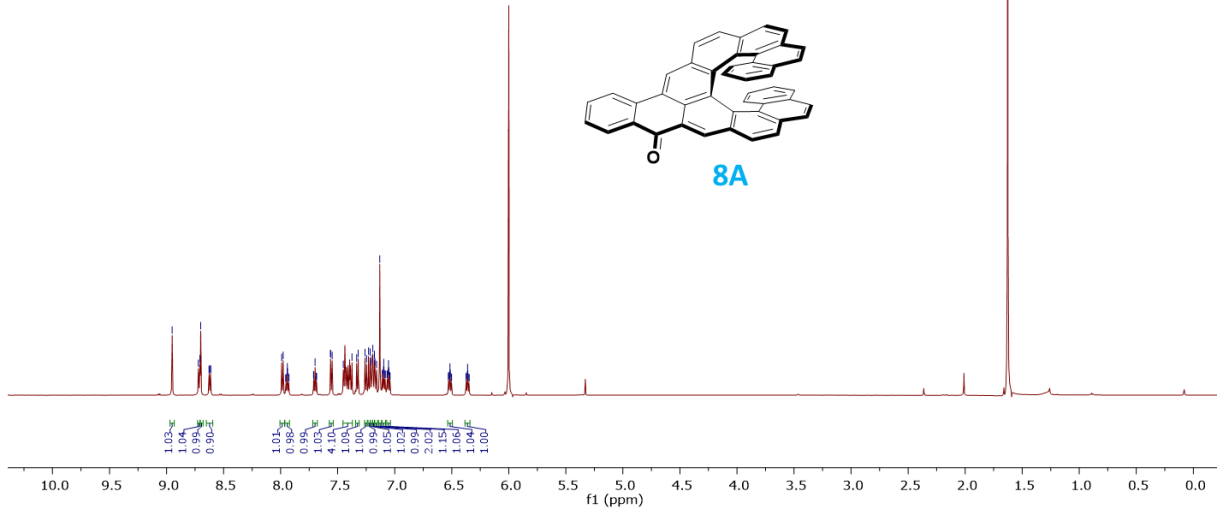

AJ284\_F2.2.fid

| Parameter                | Value               |
|--------------------------|---------------------|
| 1 Origin                 | Bruker BioSpin GmbH |
| 2 Solvent                | CD2Cl2              |
| 3 Temperature            | 298                 |
| 4 Experiment             | JMOD                |
| 5 Spectrometer Frequency | 150.93              |
| 6 Nucleus                | 13C                 |

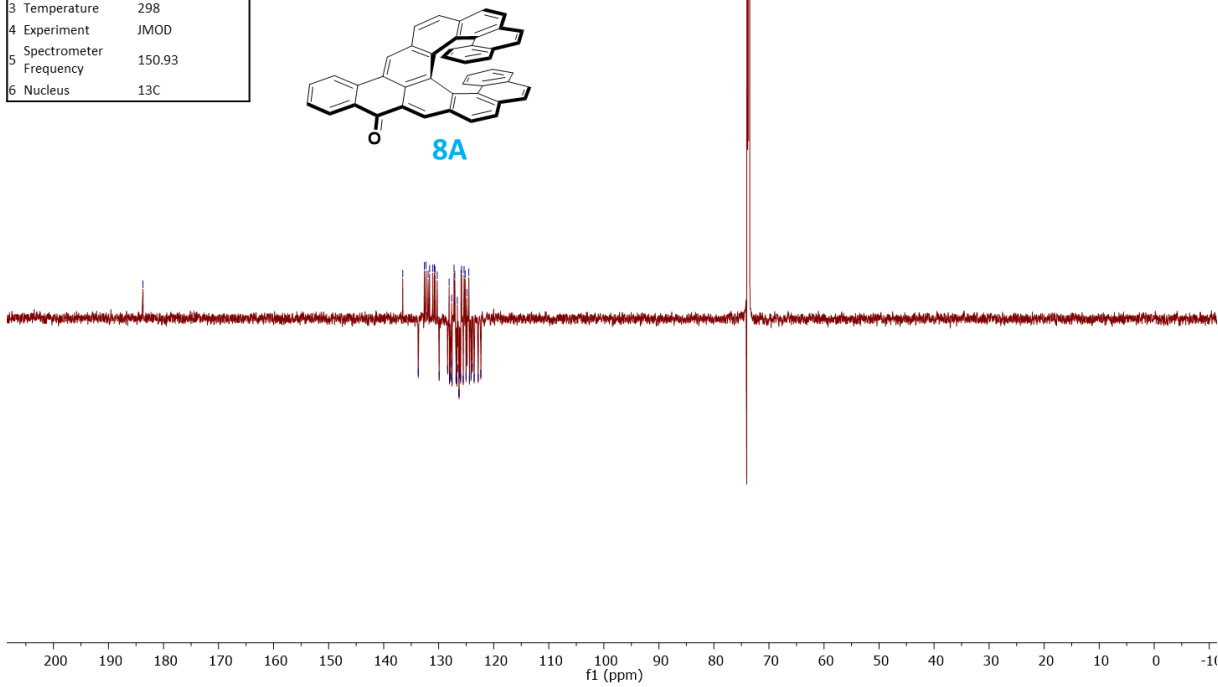

AJ284\_F1.1.fid

9.06  
8.53  
8.52  
8.25  
8.24  
7.67  
7.67  
7.66  
7.66  
7.65  
7.65  
7.56  
7.55  
7.50  
7.49  
7.46  
7.44  
7.44  
7.43  
7.42  
7.41  
7.35  
7.35  
7.22  
7.22  
7.21  
7.20  
7.19  
7.13  
7.05  
6.87  
6.81

| Parameter                | Value               |
|--------------------------|---------------------|
| 1 Origin                 | Bruker BioSpin GmbH |
| 2 Solvent                | CD2Cl2              |
| 3 Temperature            | 298                 |
| 4 Experiment             | 1D                  |
| 5 Spectrometer Frequency | 600.16              |
| 6 Nucleus                | 1H                  |

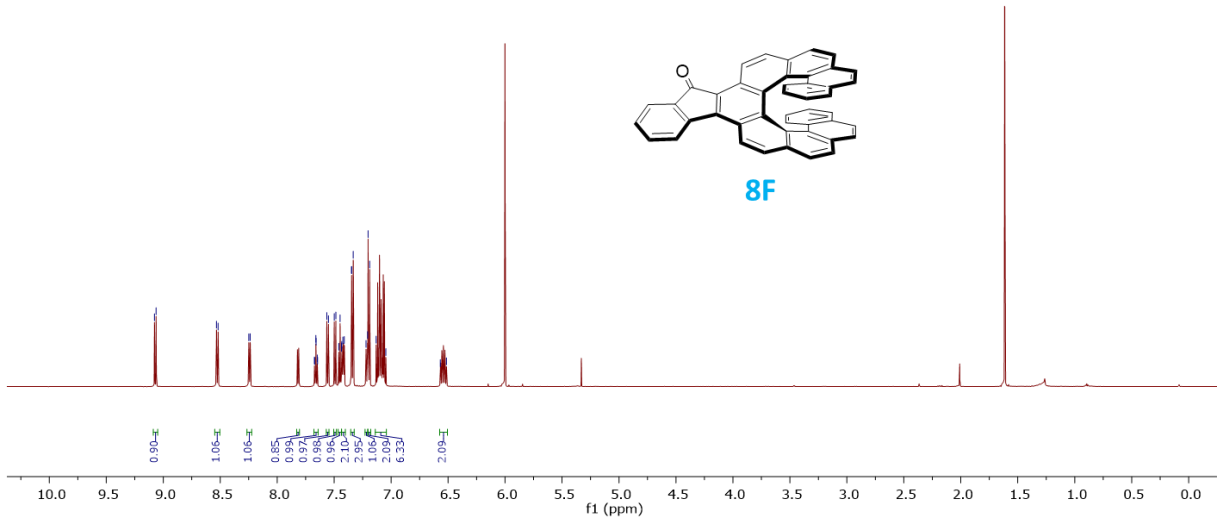

AJ284\_F1.2.fid

195

143.95  
143.75  
135.56  
133.58  
133.38  
132.11  
132.11  
131.94  
131.94  
130.03  
129.99  
129.20  
128.82  
128.82  
128.37  
127.91  
127.16  
126.94  
126.85  
126.85  
126.77  
126.74  
126.61  
126.58  
126.39  
126.29  
126.23  
126.17  
126.17  
125.81  
125.81  
125.41  
125.27  
124.94  
124.91  
124.86  
124.84  
124.84  
124.70  
124.70  
123.91  
123.61  
123.40  
122.88  
122.61  
121.72  
121.45

| Parameter                | Value               |
|--------------------------|---------------------|
| 1 Origin                 | Bruker BioSpin GmbH |
| 2 Solvent                | CD2Cl2              |
| 3 Temperature            | 298                 |
| 4 Experiment             | JMOD                |
| 5 Spectrometer Frequency | 150.93              |
| 6 Nucleus                | 13C                 |

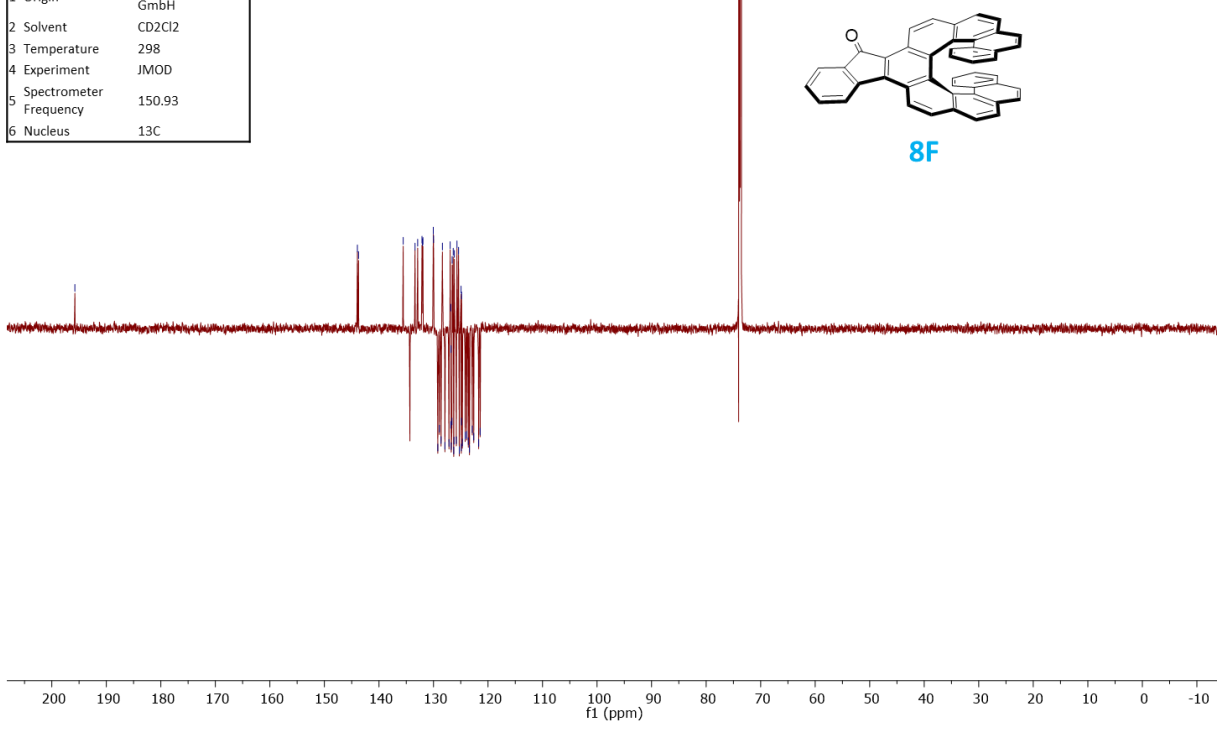

Is wittig1  
single\_pulse

7.90  
7.91  
7.92  
7.76  
7.74  
7.74  
7.53  
7.46  
7.36  
7.32  
7.16  
4.66

| Parameter      | Value  |
|----------------|--------|
| 1 Origin       | JEOL   |
| 2 Solvent      | CD2Cl2 |
| 3 Temperature  | 297    |
| 4 Experiment   | 1D     |
| 5 Spectrometer | 399.78 |
| 6 Nucleus      | 1H     |

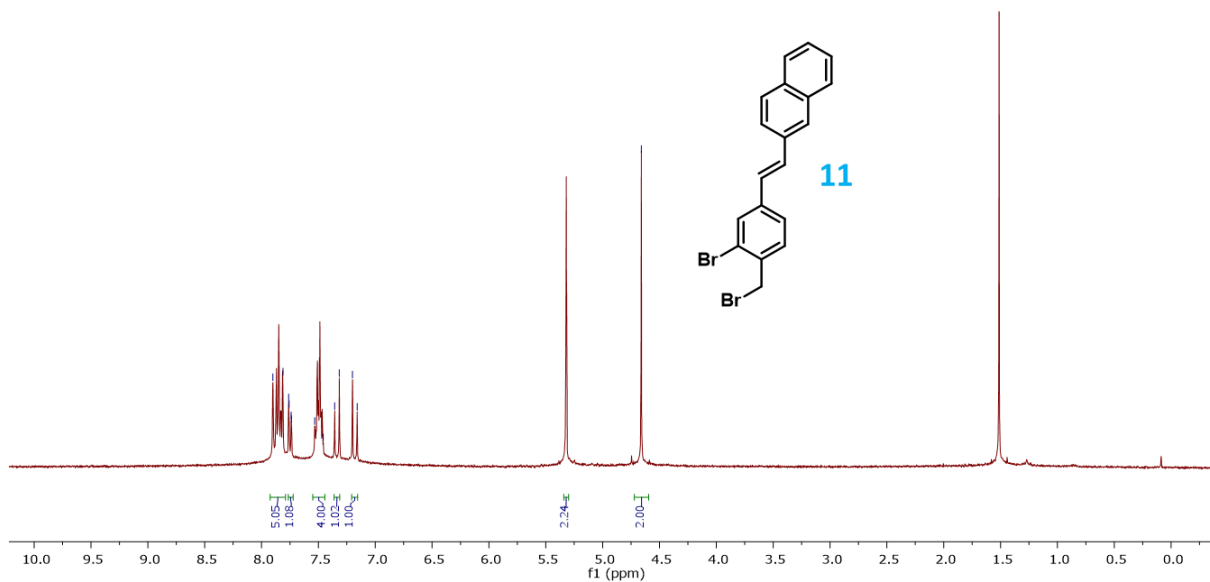

Is-wittig1  
APT Experiment

140.33  
136.54  
134.69  
134.17  
133.86  
132.04  
131.83  
131.47  
128.96  
128.61  
128.21  
127.79  
127.10  
127.05  
126.66  
126.54  
125.38  
123.82  
34.18

| Parameter      | Value  |
|----------------|--------|
| 1 Origin       | JEOL   |
| 2 Solvent      | CD2Cl2 |
| 3 Temperature  | 297    |
| 4 Experiment   | JMOD   |
| 5 Spectrometer | 100.53 |
| 6 Nucleus      | 13C    |

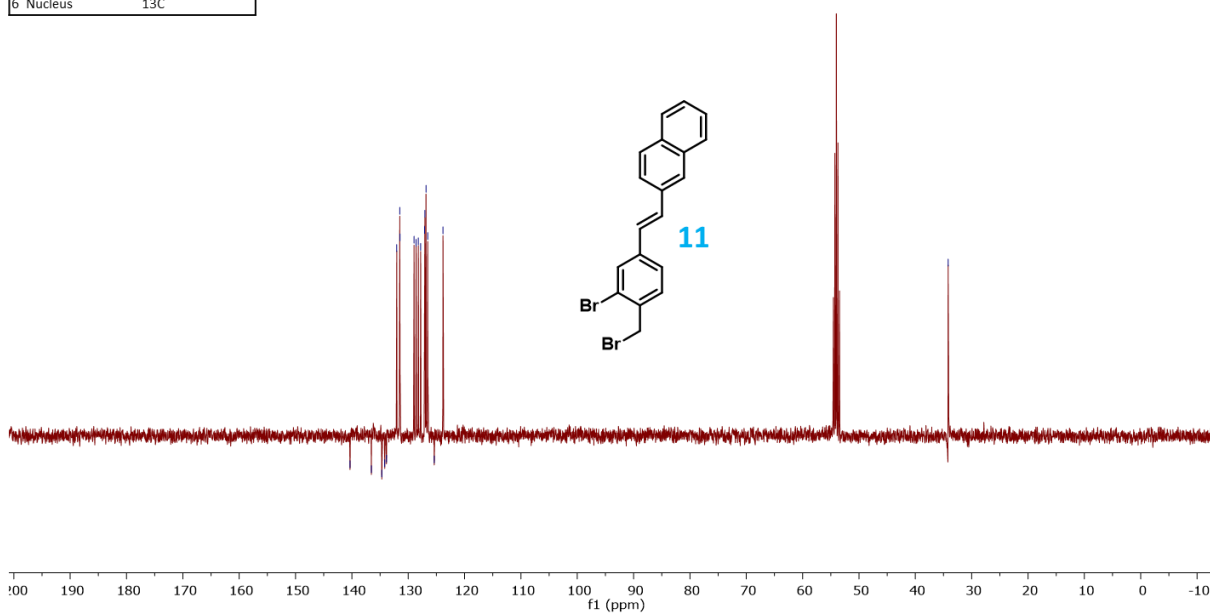

Is-phosphonate 2  
single\_pulse

| Parameter                | Value  |
|--------------------------|--------|
| 1 Origin                 | JEOL   |
| 2 Solvent                | CD2Cl2 |
| 3 Temperature            | 297    |
| 4 Experiment             | 1D     |
| 5 Spectrometer Frequency | 399.78 |
| 6 Nucleus                | 1H     |

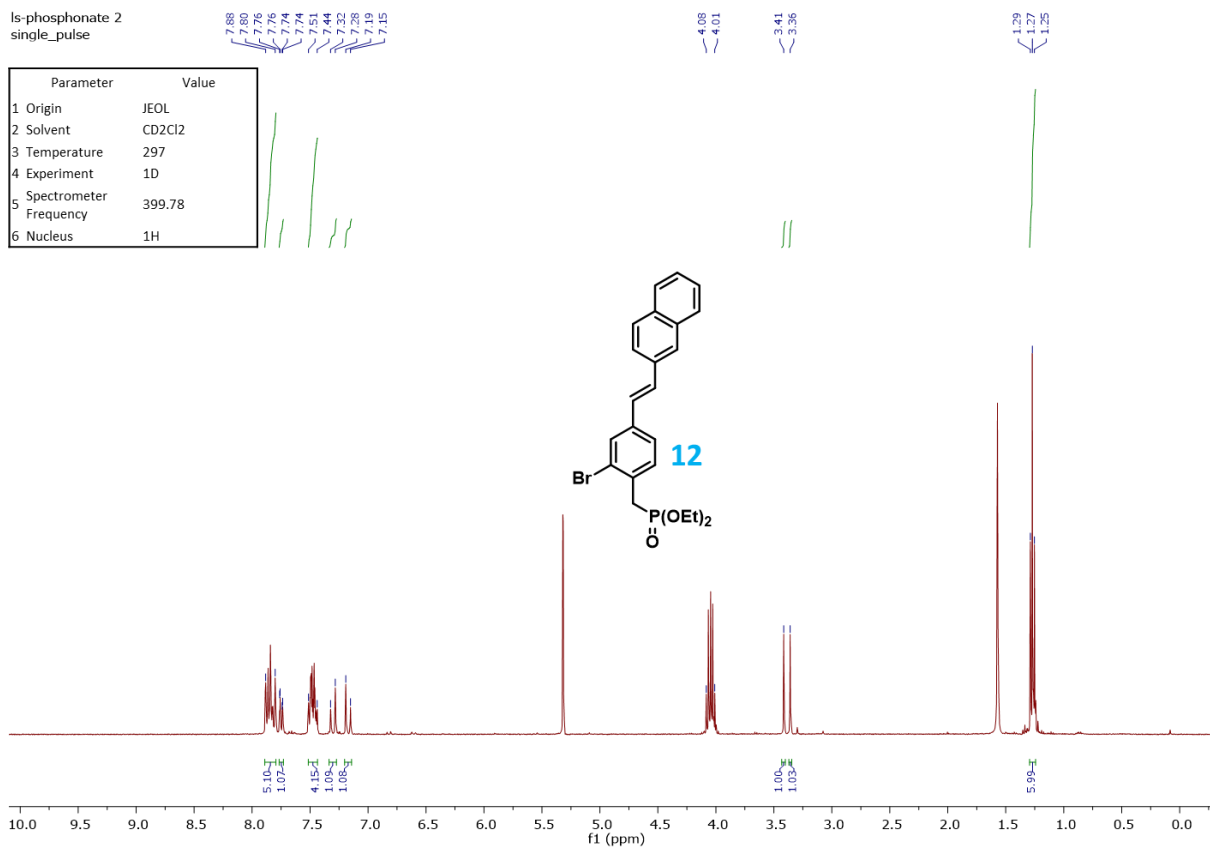

sl tube ludmilla  
APT Experiment

| Parameter                | Value  |
|--------------------------|--------|
| 1 Origin                 | JEOL   |
| 2 Solvent                | CD2Cl2 |
| 3 Temperature            | 297    |
| 4 Experiment             | JMOD   |
| 5 Spectrometer Frequency | 100.53 |
| 6 Nucleus                | 13C    |

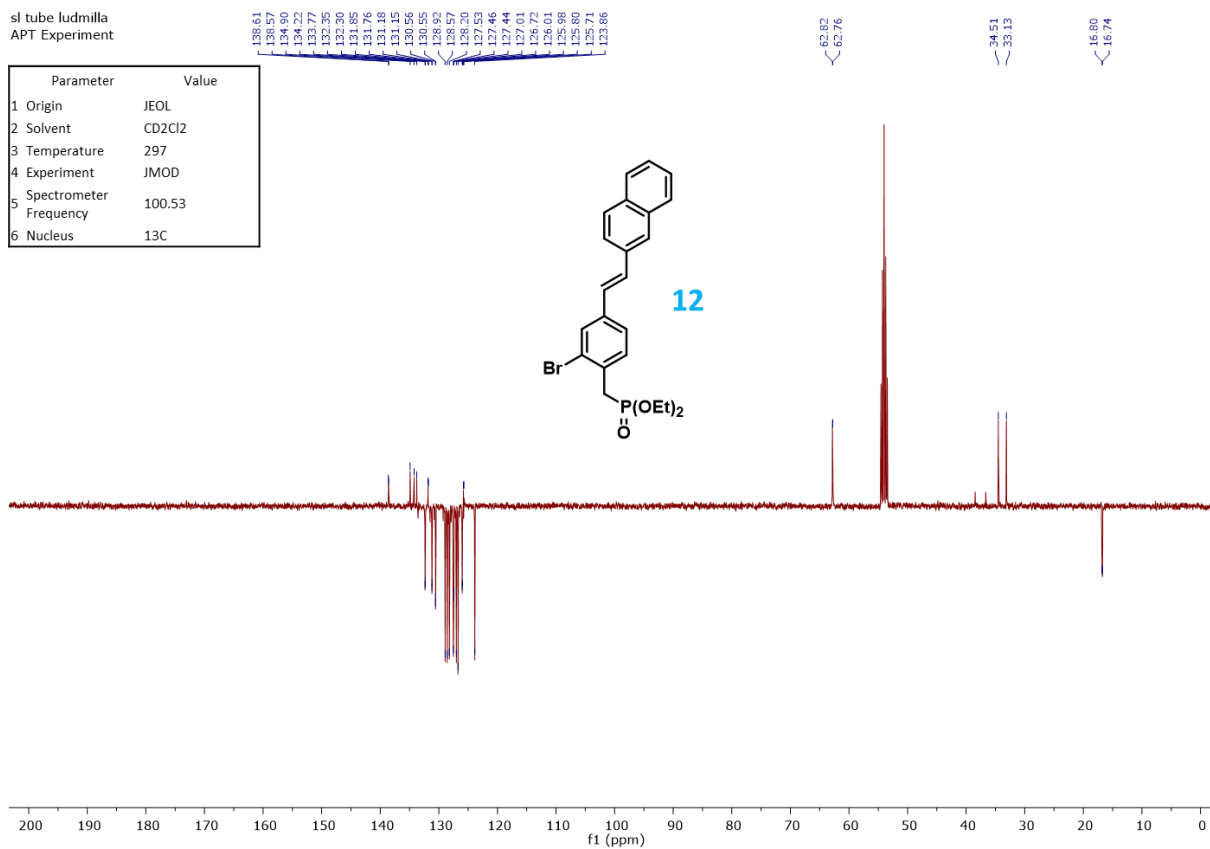

Is-bisstilbene  
single\_pulse

7.89  
7.82  
7.77  
7.77  
7.75  
7.75  
7.60  
7.45  
7.42  
7.38  
7.35  
7.29  
7.29  
7.17  
7.15  
7.11

| Parameter      | Value  |
|----------------|--------|
| 1 Origin       | JEOL   |
| 2 Solvent      | CD2Cl2 |
| 3 Temperature  | 297    |
| 4 Experiment   | 1D     |
| 5 Spectrometer | 399.78 |
| 6 Nucleus      | 1H     |

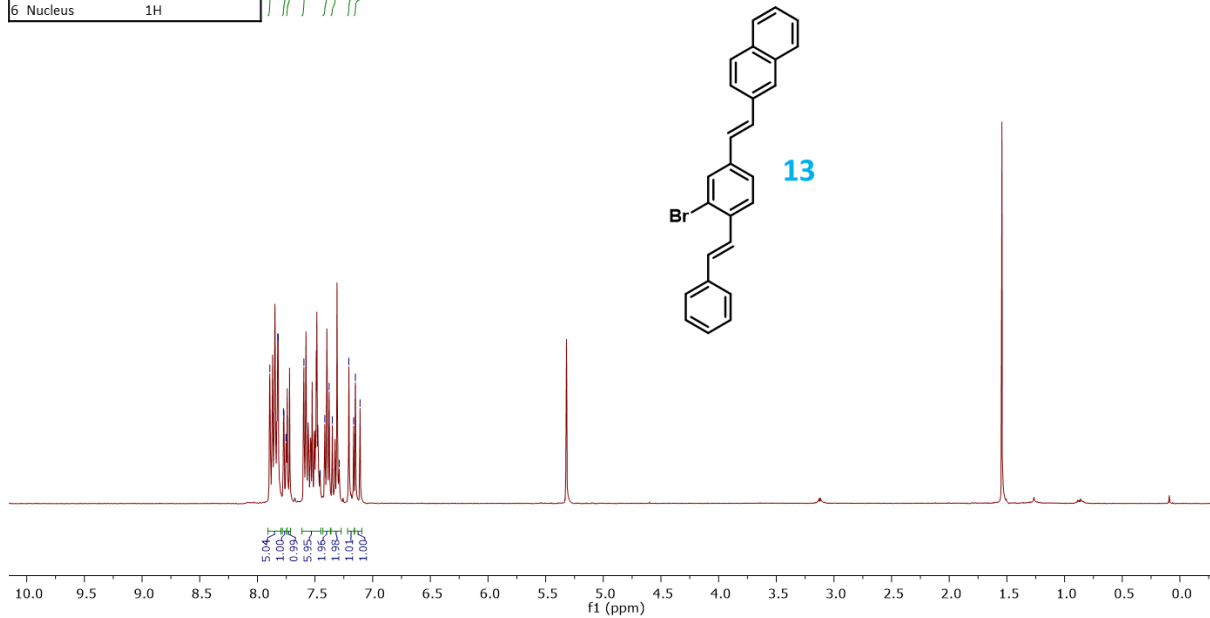

Is-bisstilbene  
APT Experiment

138.87  
137.57  
136.46  
134.93  
134.21  
133.77  
131.75  
131.43  
130.47  
129.31  
128.93  
128.69  
128.57  
128.20  
127.88  
127.48  
127.35  
127.14  
127.01  
126.73  
126.21  
125.00  
123.85

| Parameter      | Value  |
|----------------|--------|
| 1 Origin       | JEOL   |
| 2 Solvent      | CD2Cl2 |
| 3 Temperature  | 297    |
| 4 Experiment   | JMOD   |
| 5 Spectrometer | 100.53 |
| 6 Nucleus      | 13C    |

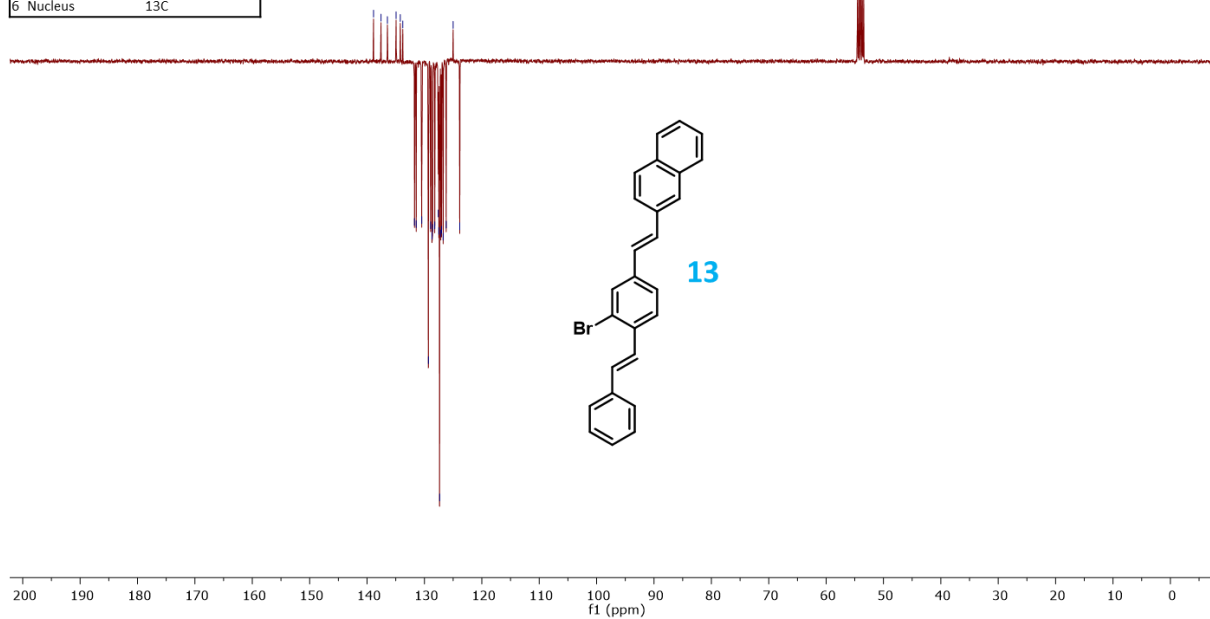



Is-6Helicene pur  
single\_pulse

8.43  
8.41  
8.38  
8.03  
7.99  
7.93  
7.89  
7.83  
7.56  
7.54  
7.42  
7.28  
7.20  
6.70  
6.64

| Parameter                   | Value  |
|-----------------------------|--------|
| 1 Origin                    | JEOL   |
| 2 Solvent                   | CD2Cl2 |
| 3 Temperature               | 297    |
| 4 Experiment                | 1D     |
| 5 Spectrometer<br>Frequency | 399.78 |
| 6 Nucleus                   | 1H     |

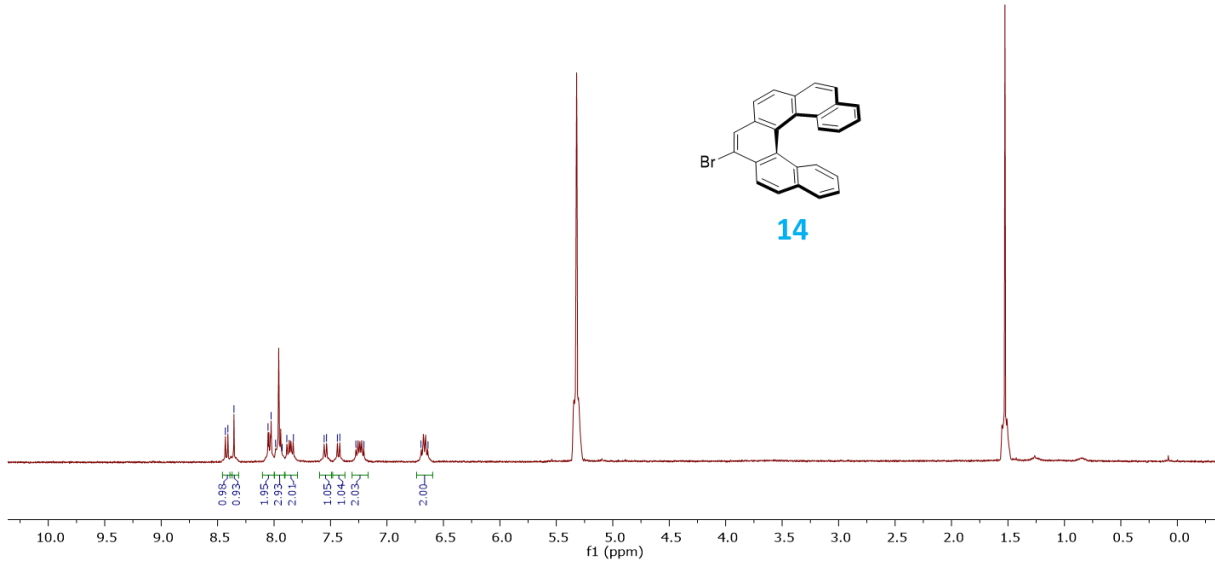

Is-6Helicene again apt  
APT Experiment

135.21  
131.77  
131.79  
130.19  
129.79  
129.62  
129.56  
129.39  
129.36  
128.30  
128.25  
128.04  
127.68  
127.56  
127.39  
126.54  
126.14  
125.80  
125.73  
125.09  
124.77  
124.57  
122.46  
121.40

| Parameter                   | Value  |
|-----------------------------|--------|
| 1 Origin                    | JEOL   |
| 2 Solvent                   | CD2Cl2 |
| 3 Temperature               | 297    |
| 4 Experiment                | JMOD   |
| 5 Spectrometer<br>Frequency | 100.53 |
| 6 Nucleus                   | 13C    |

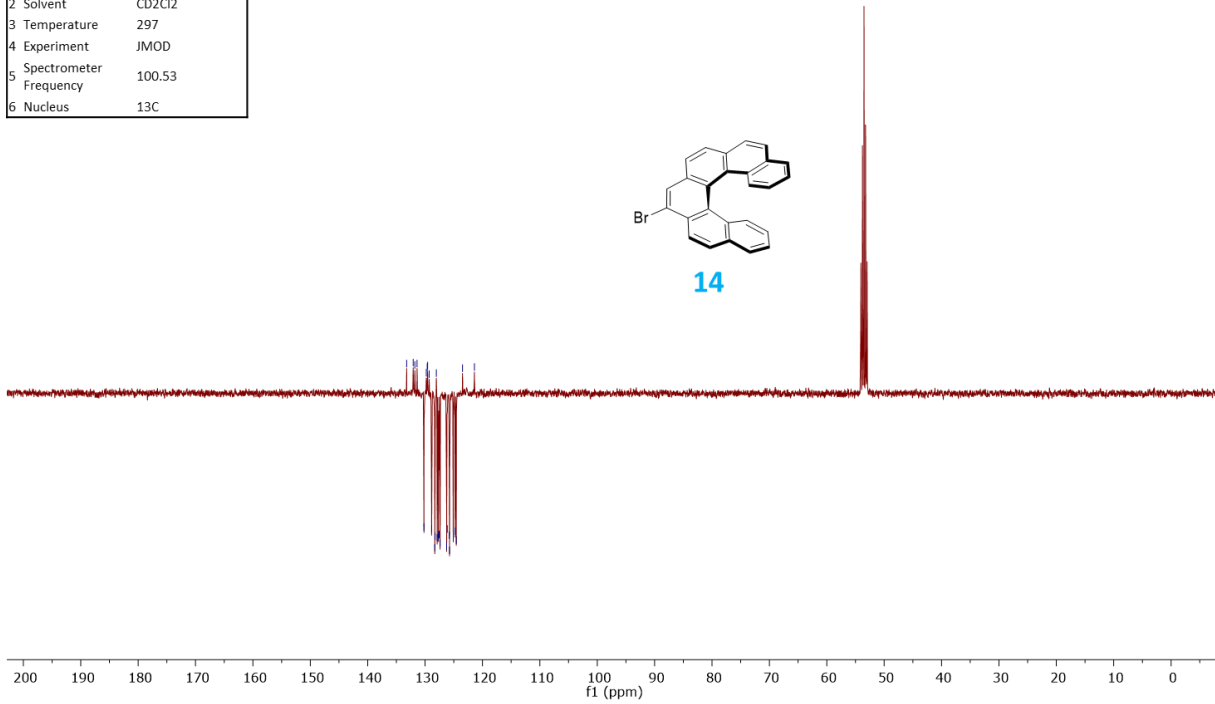

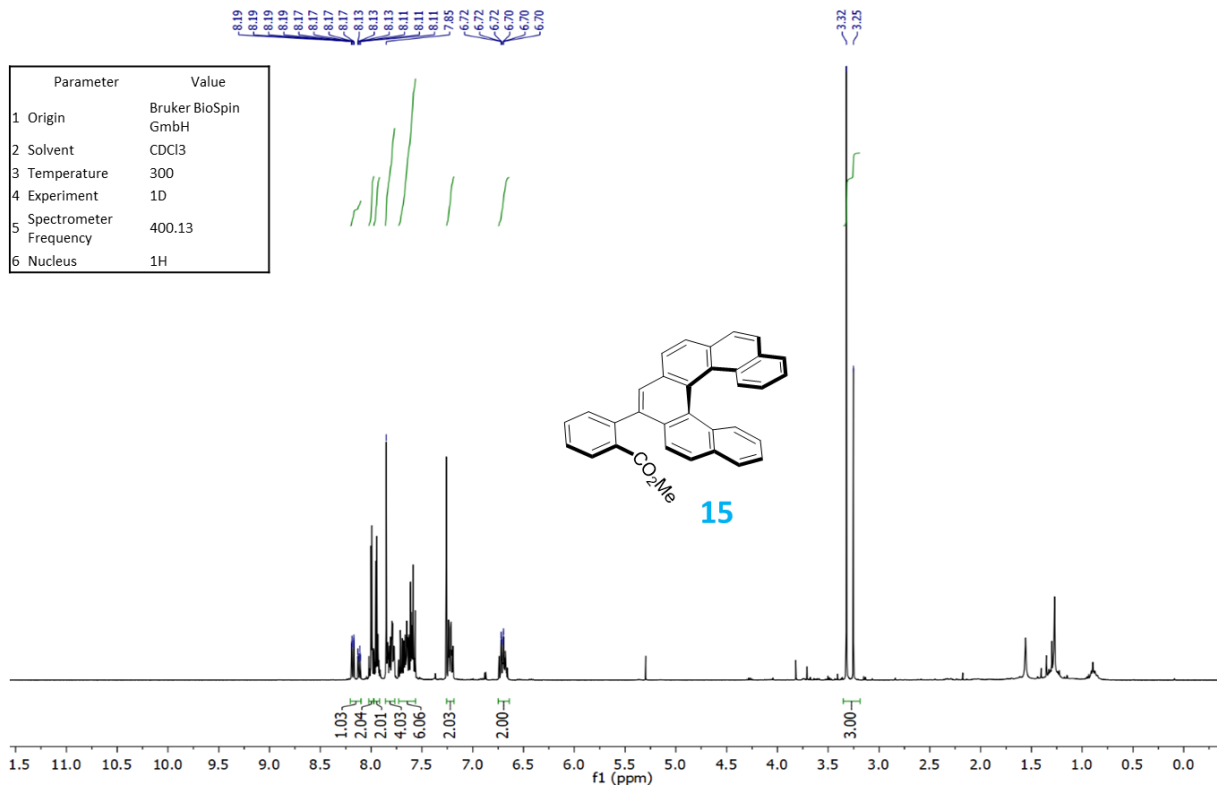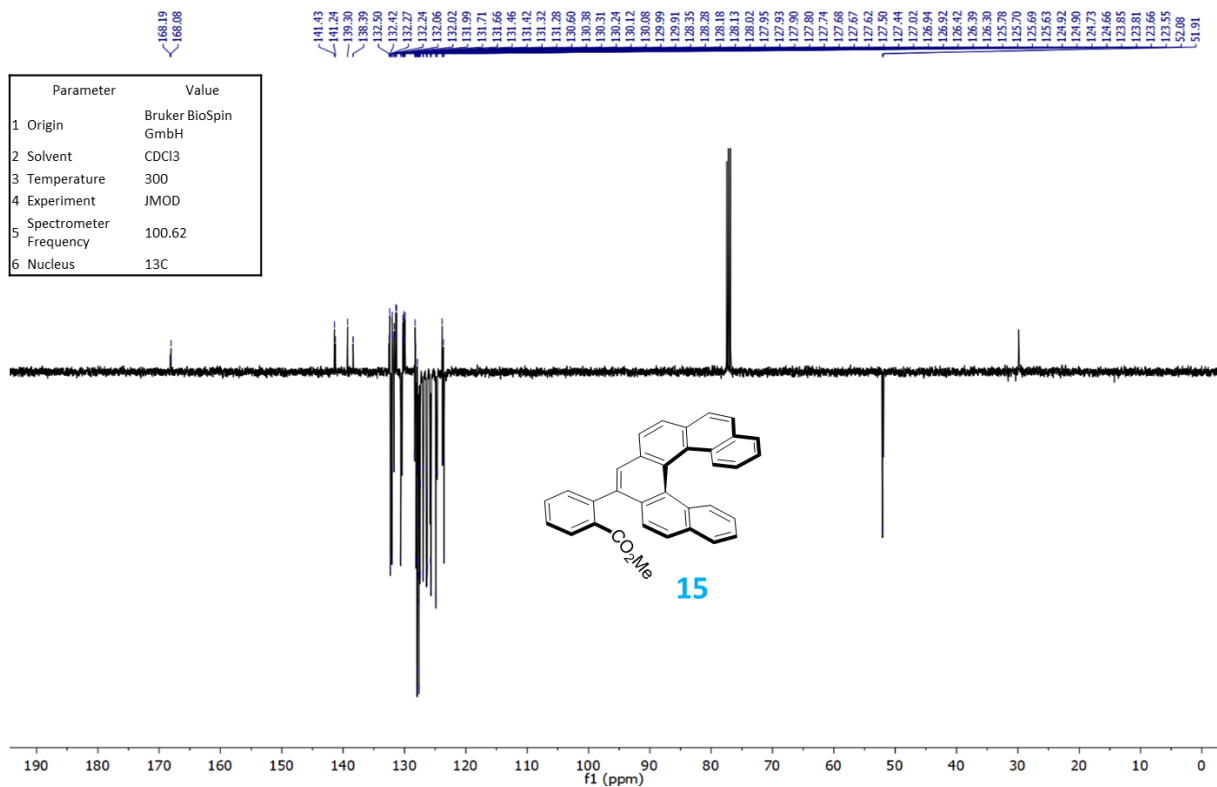

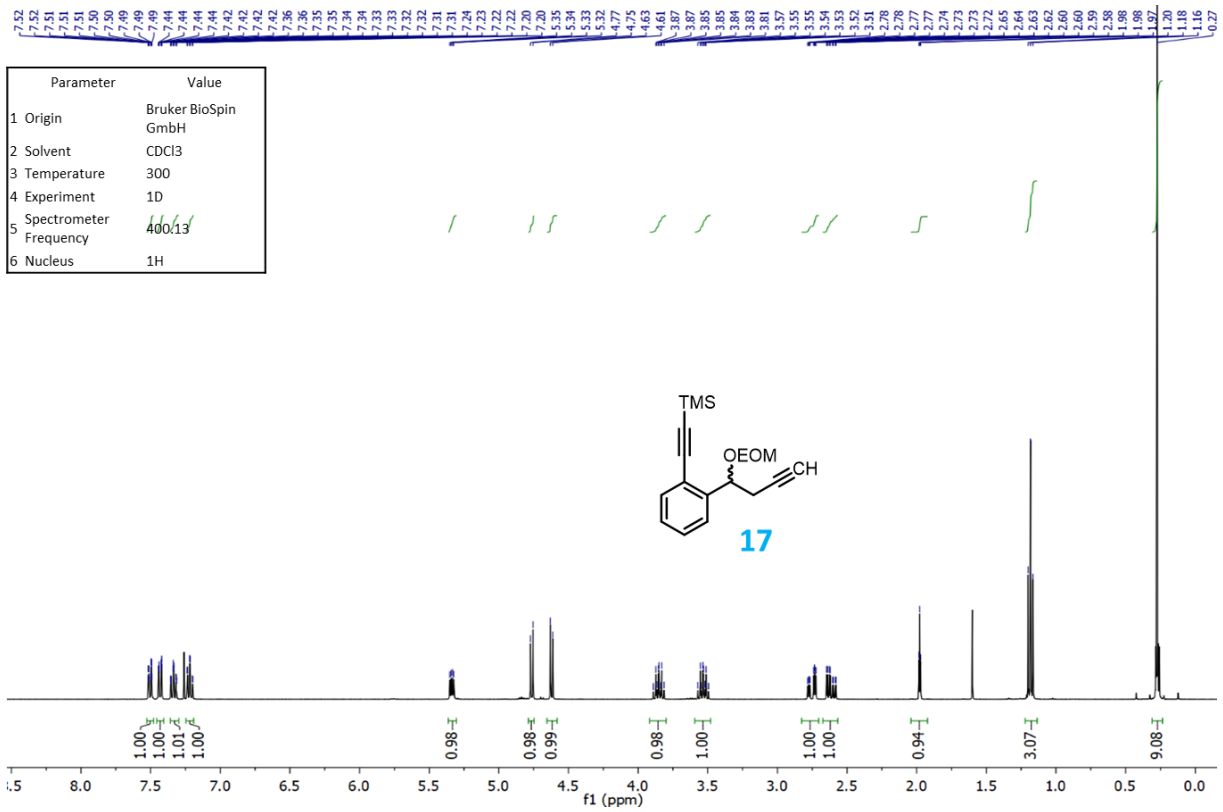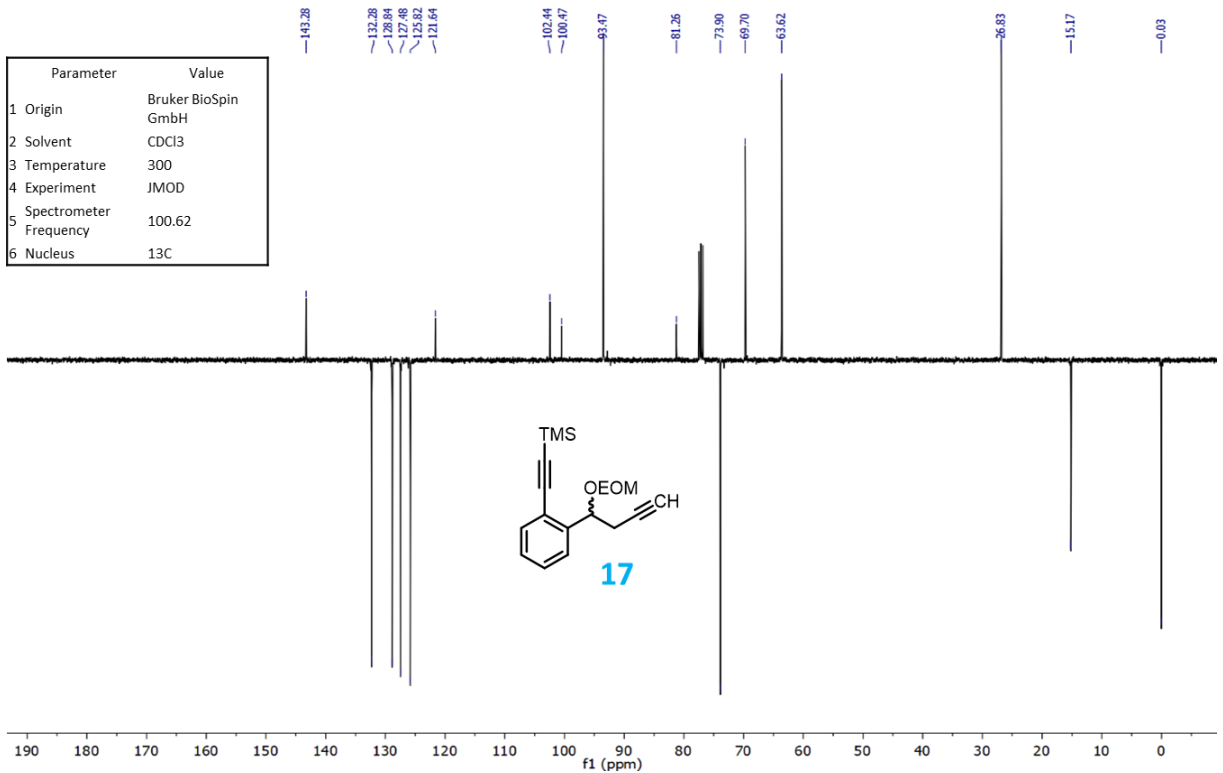



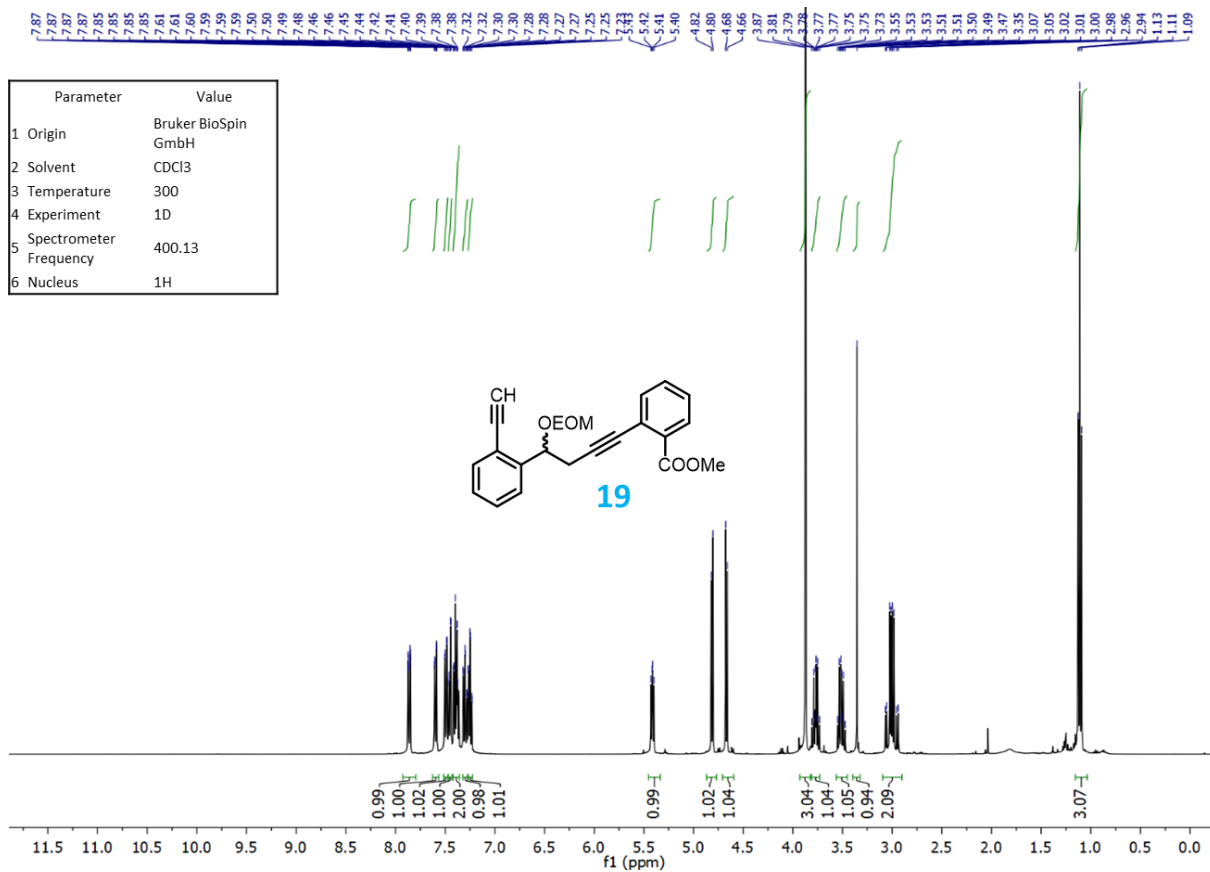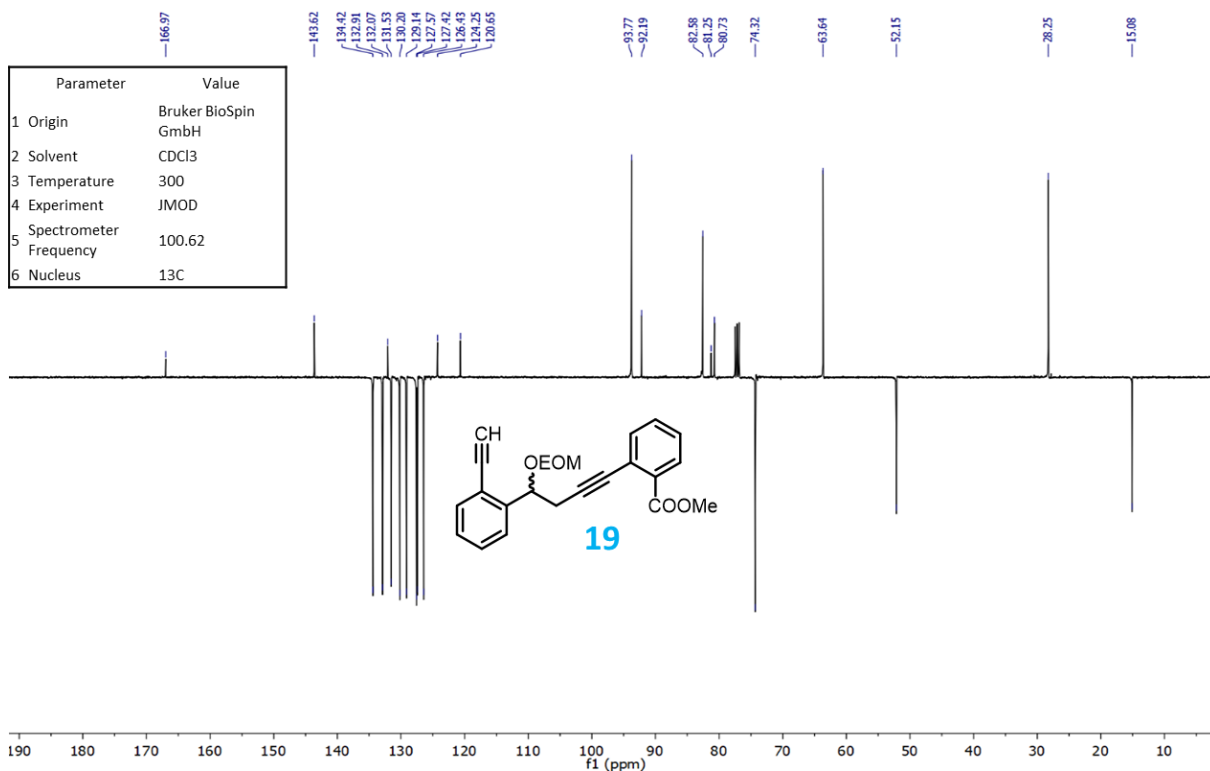

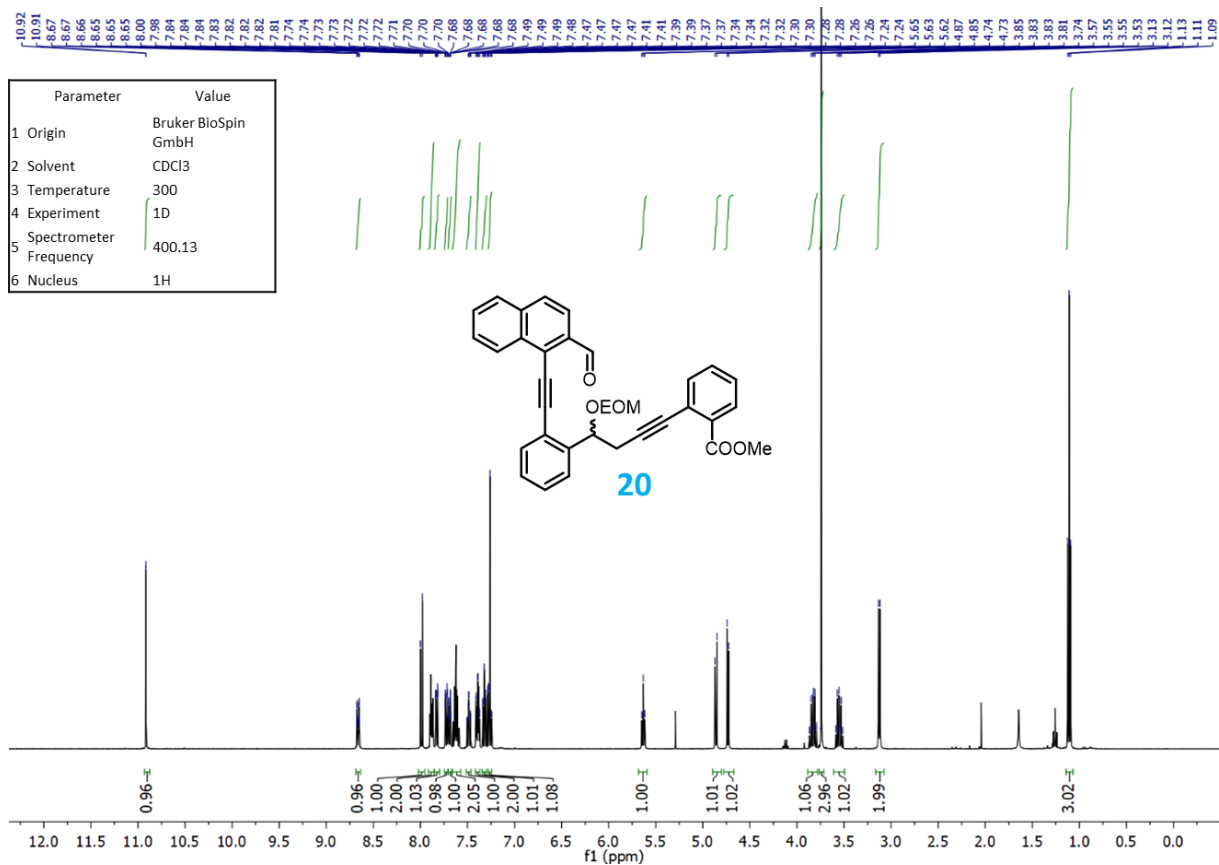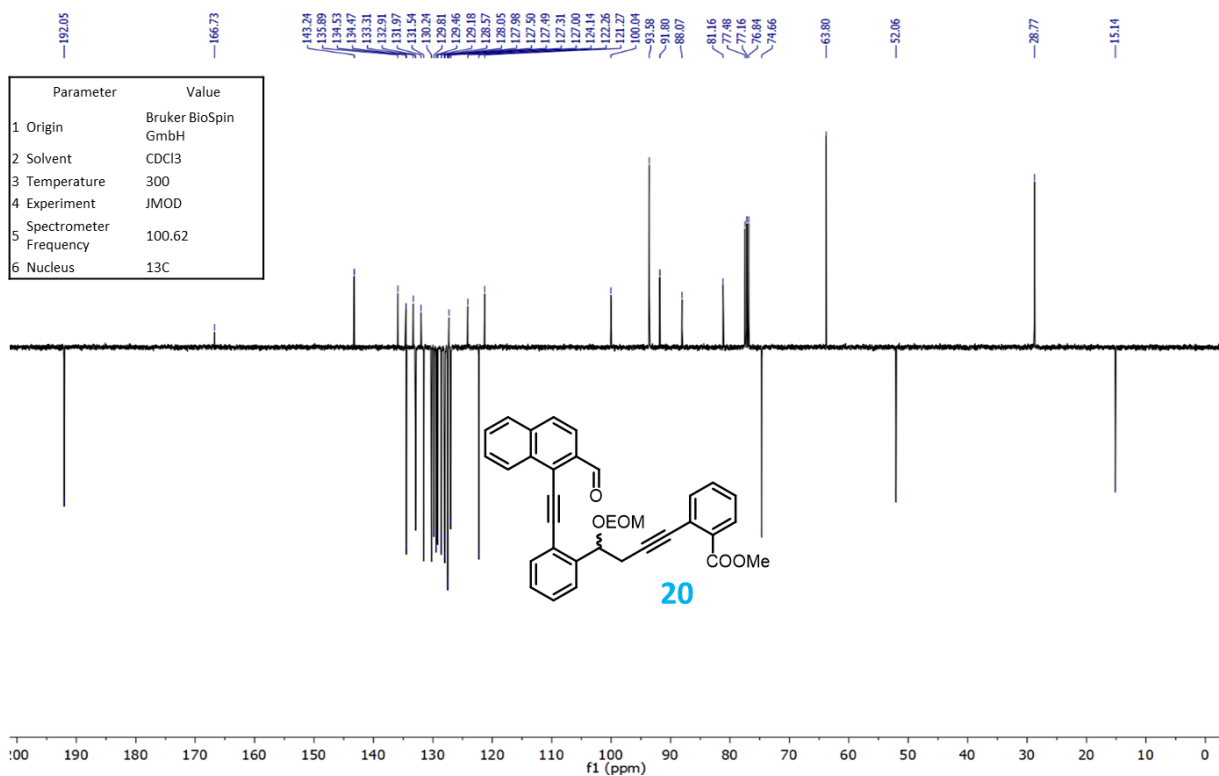

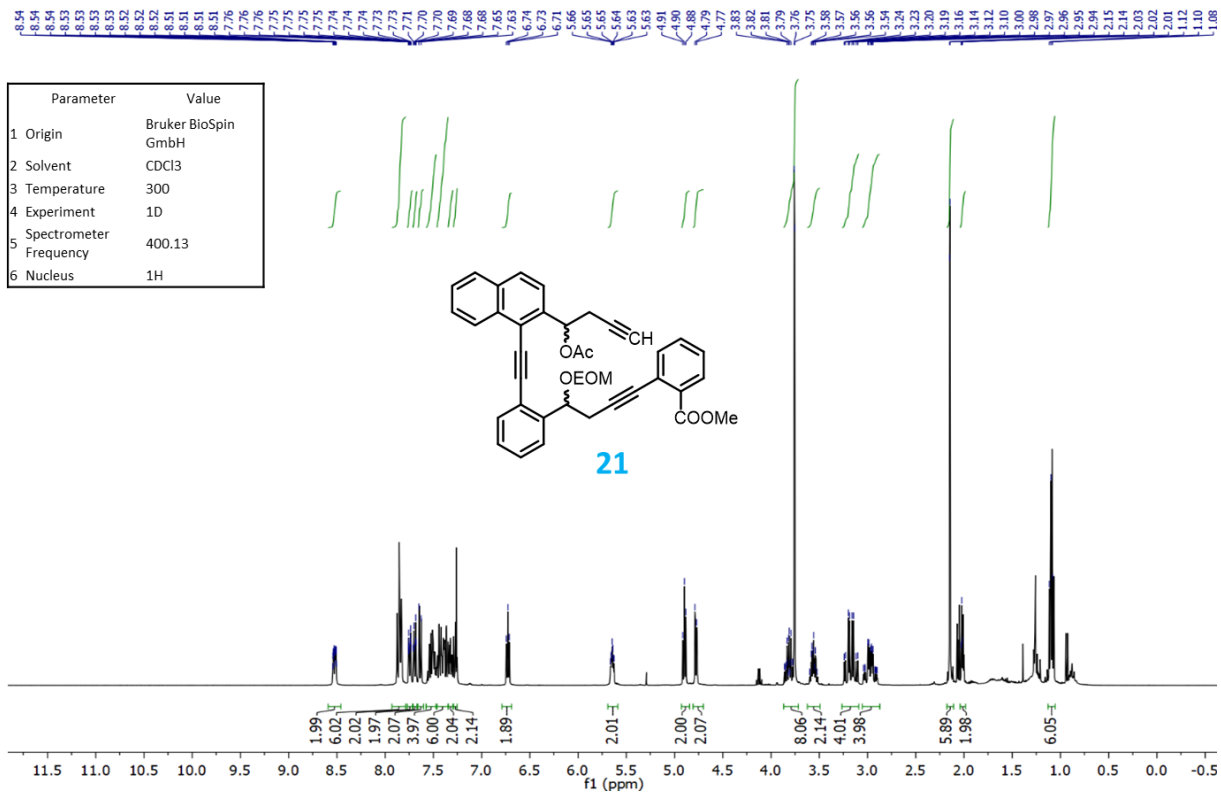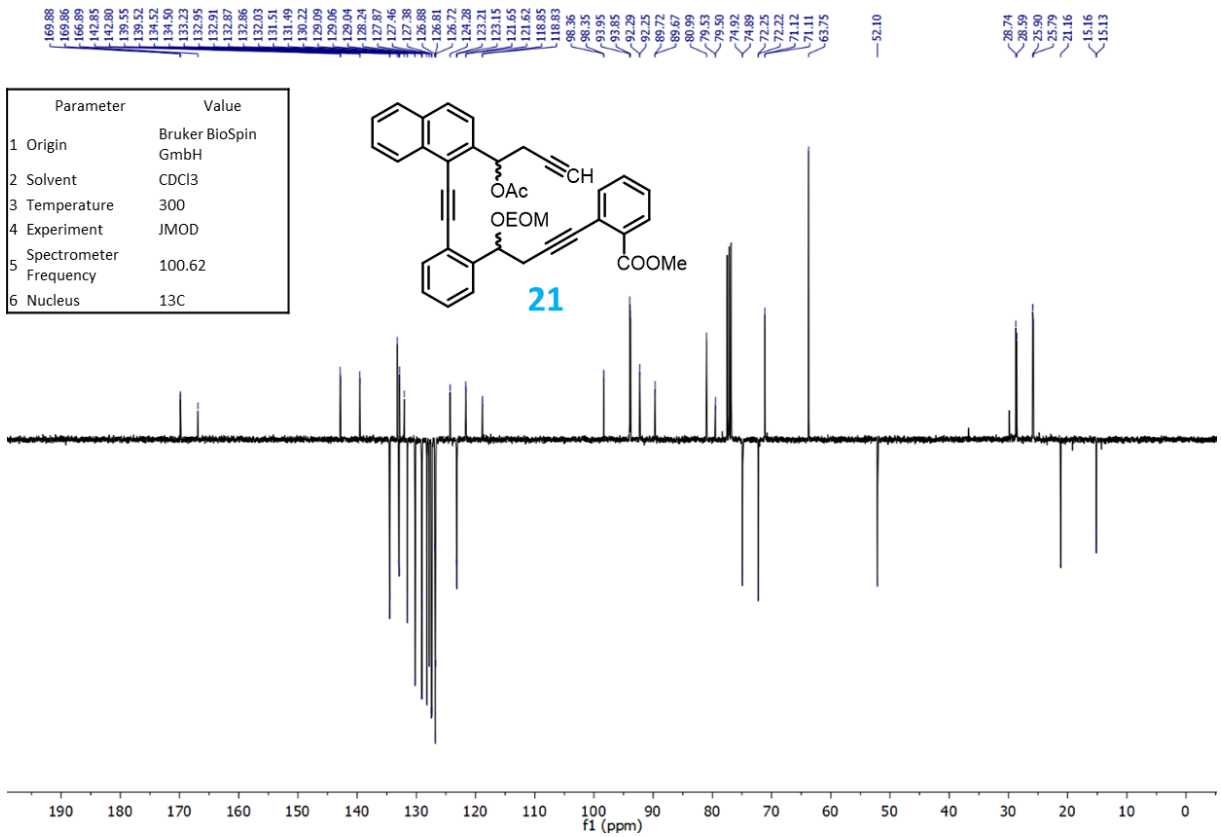

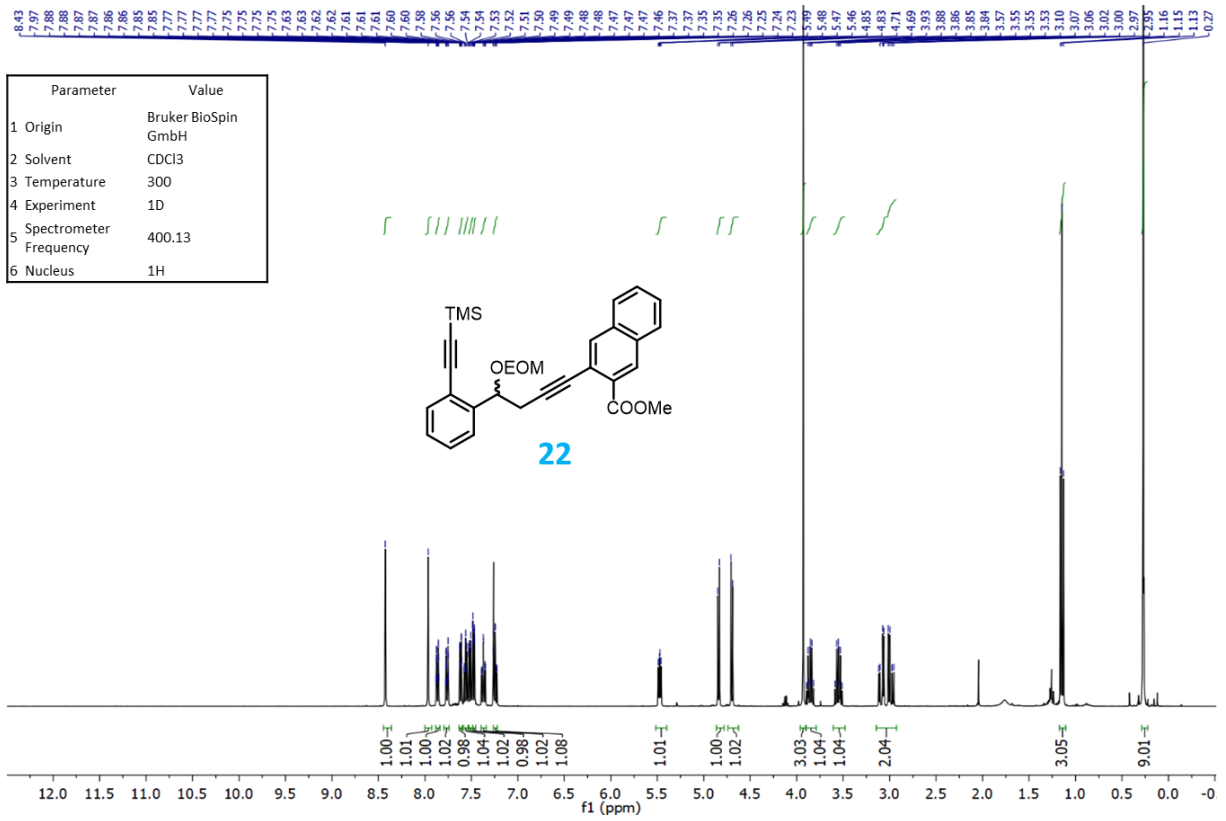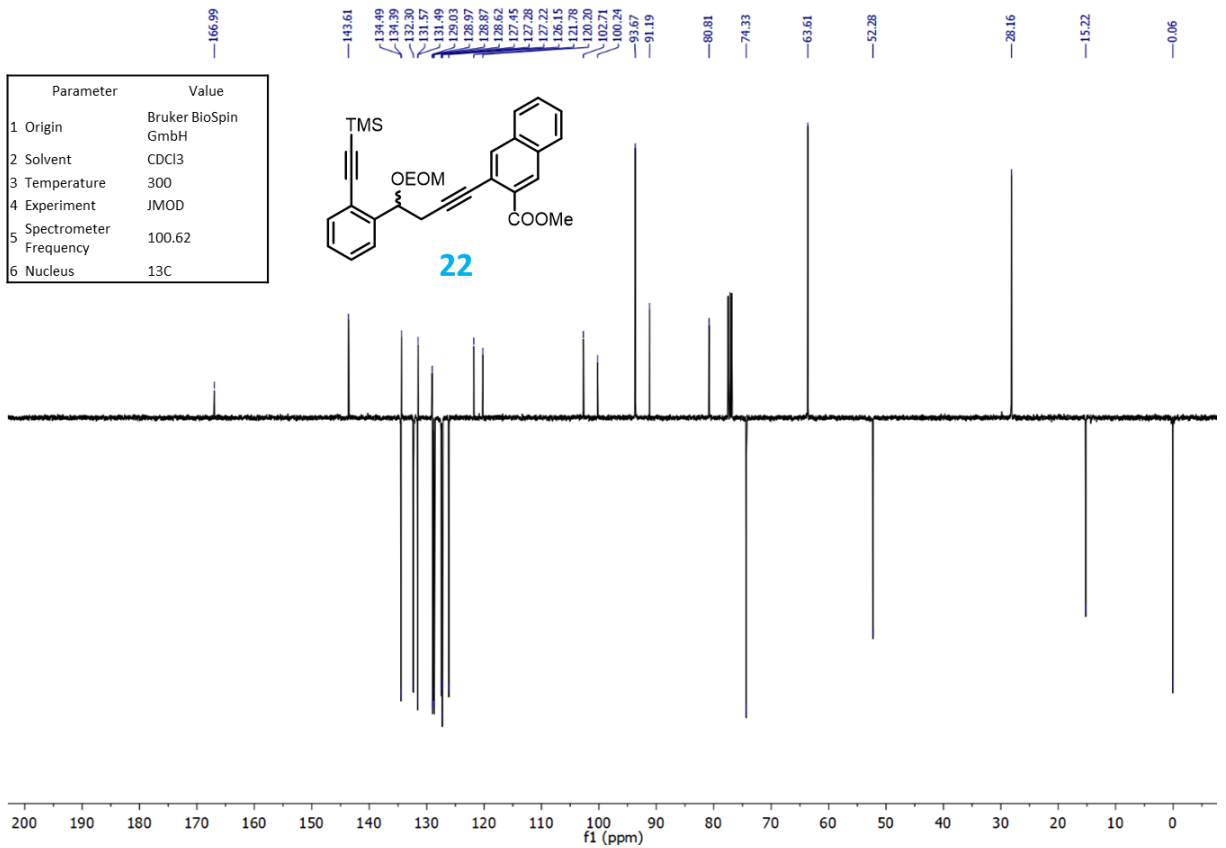



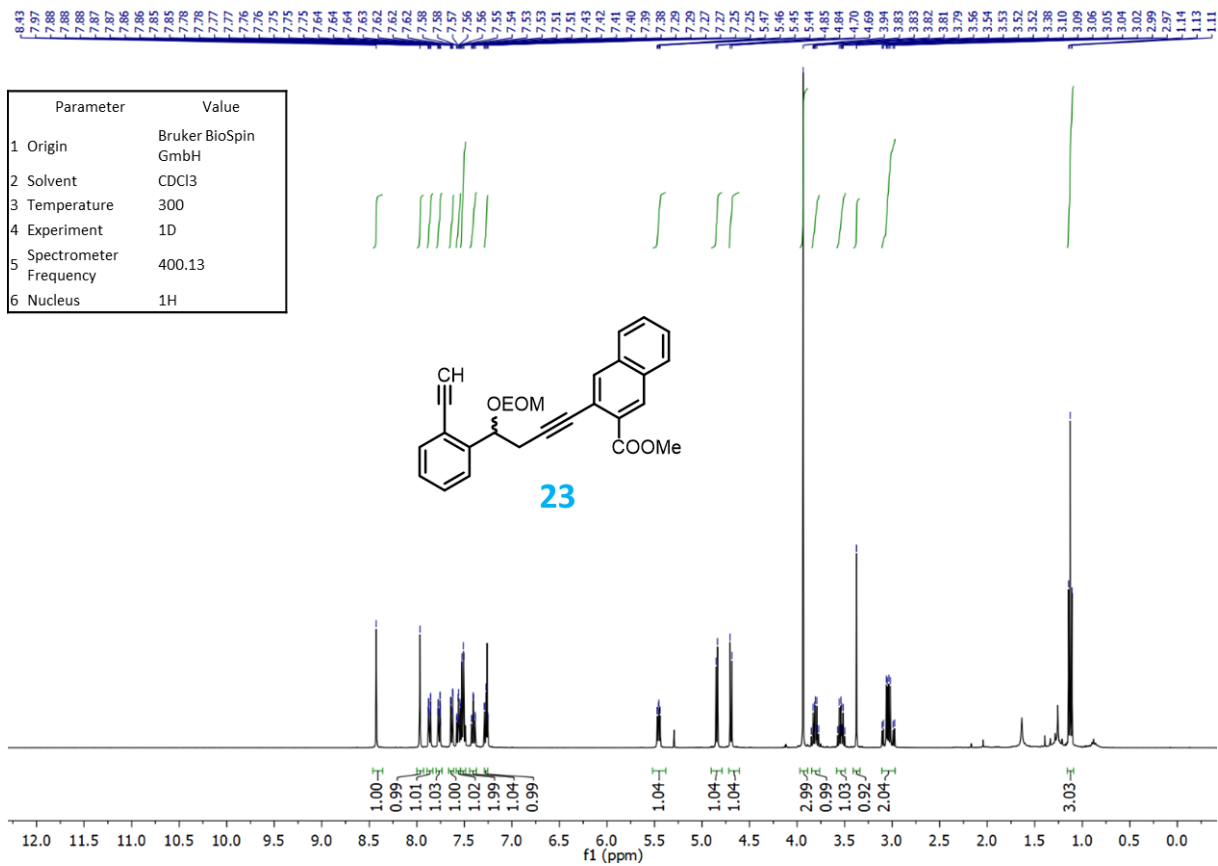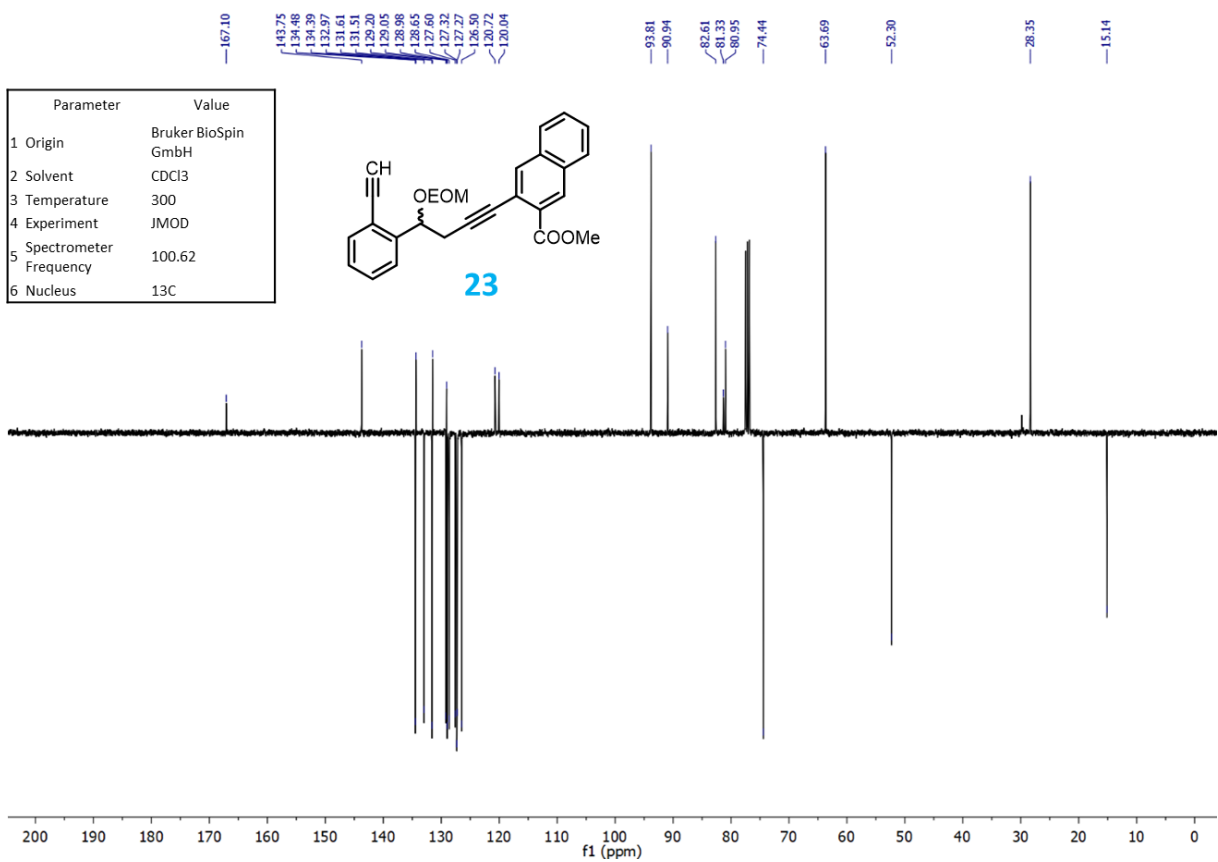

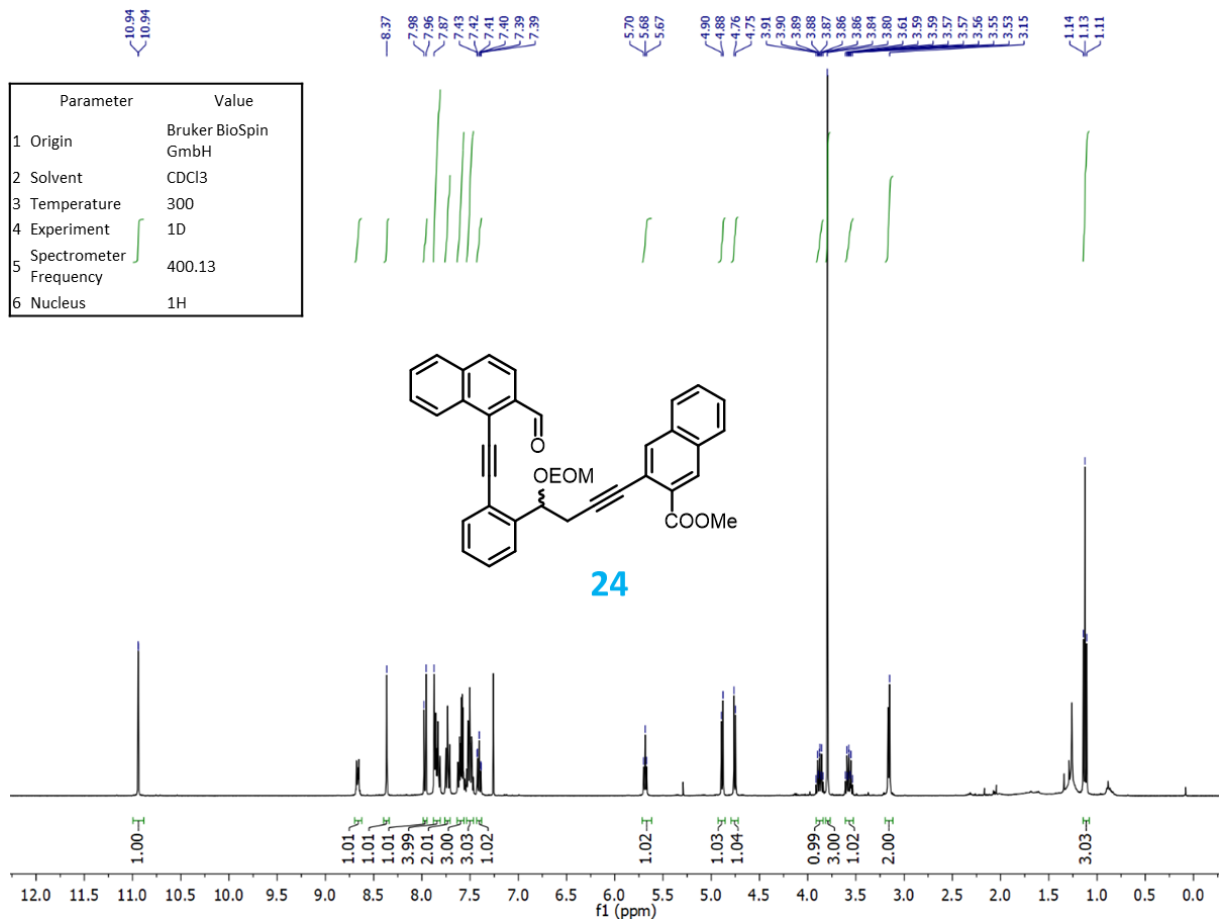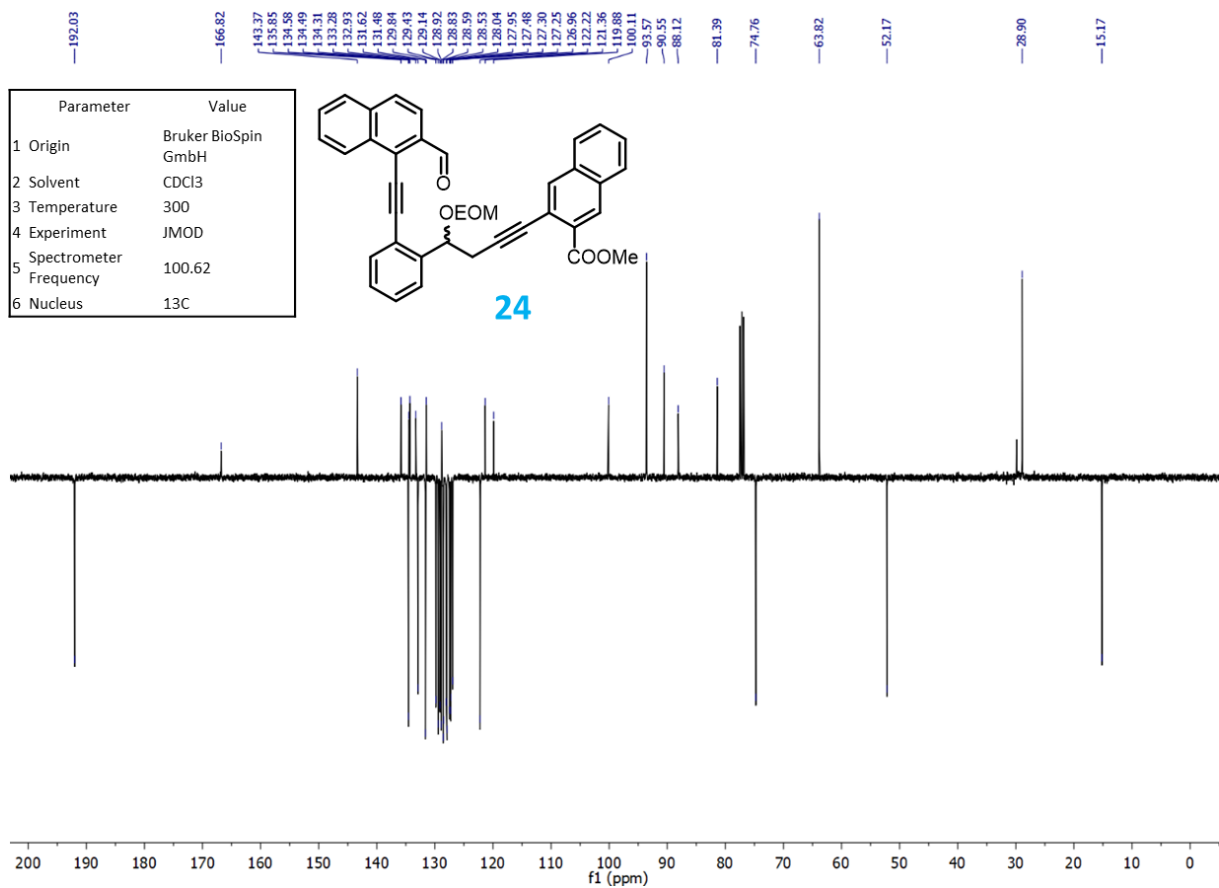

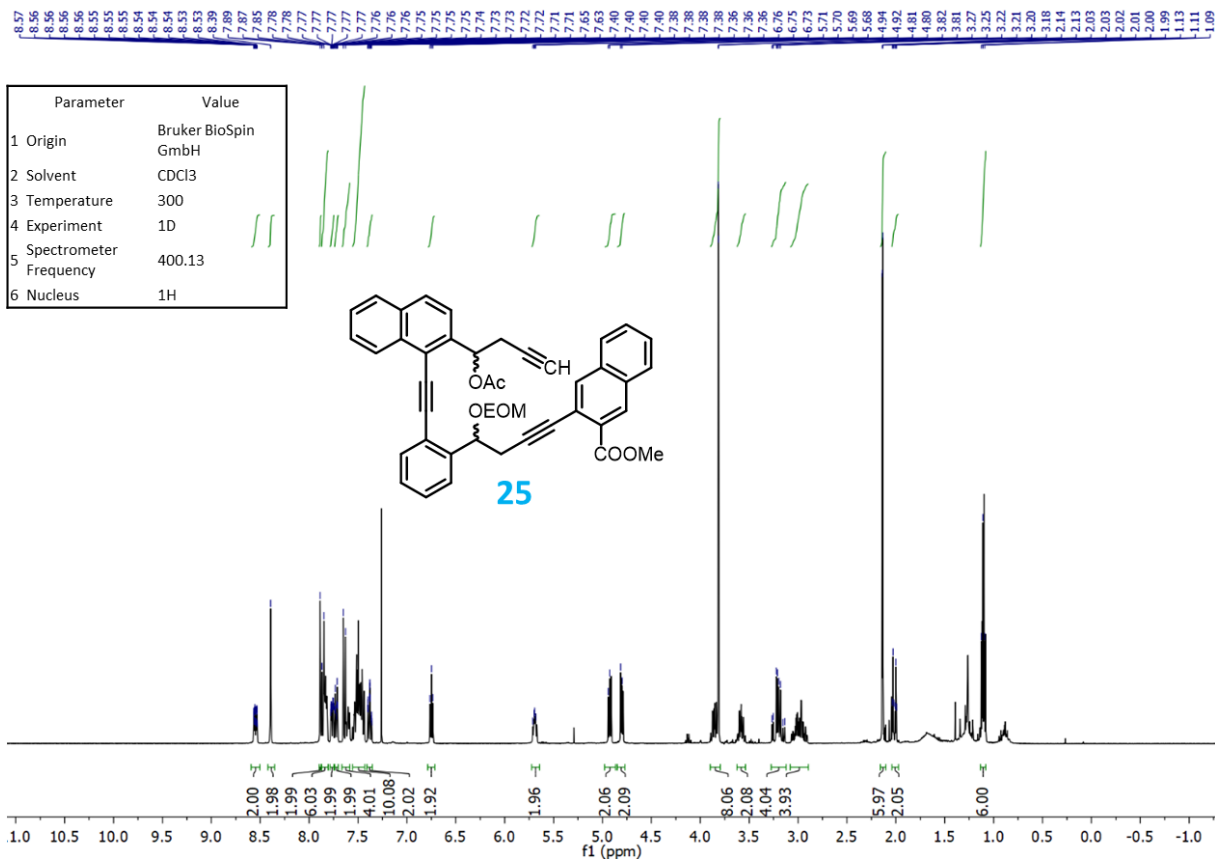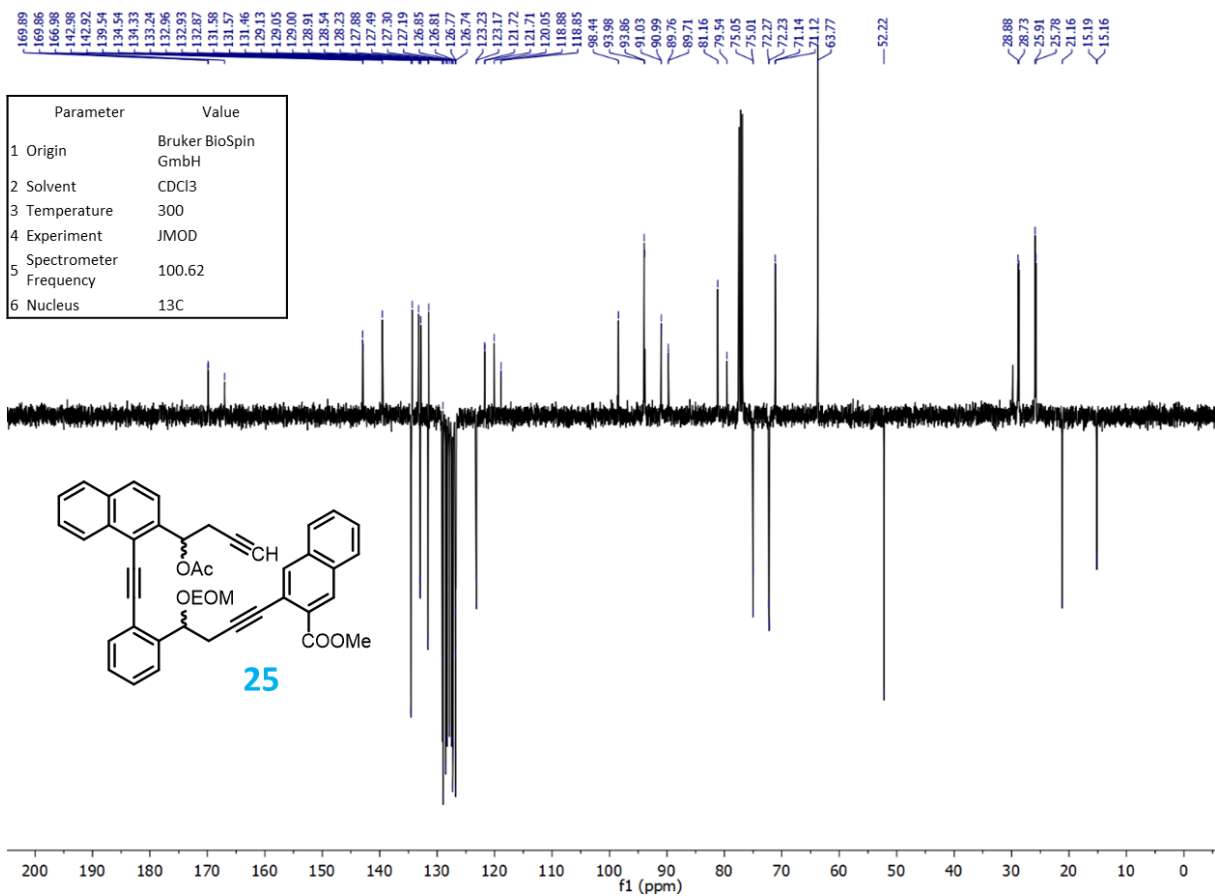

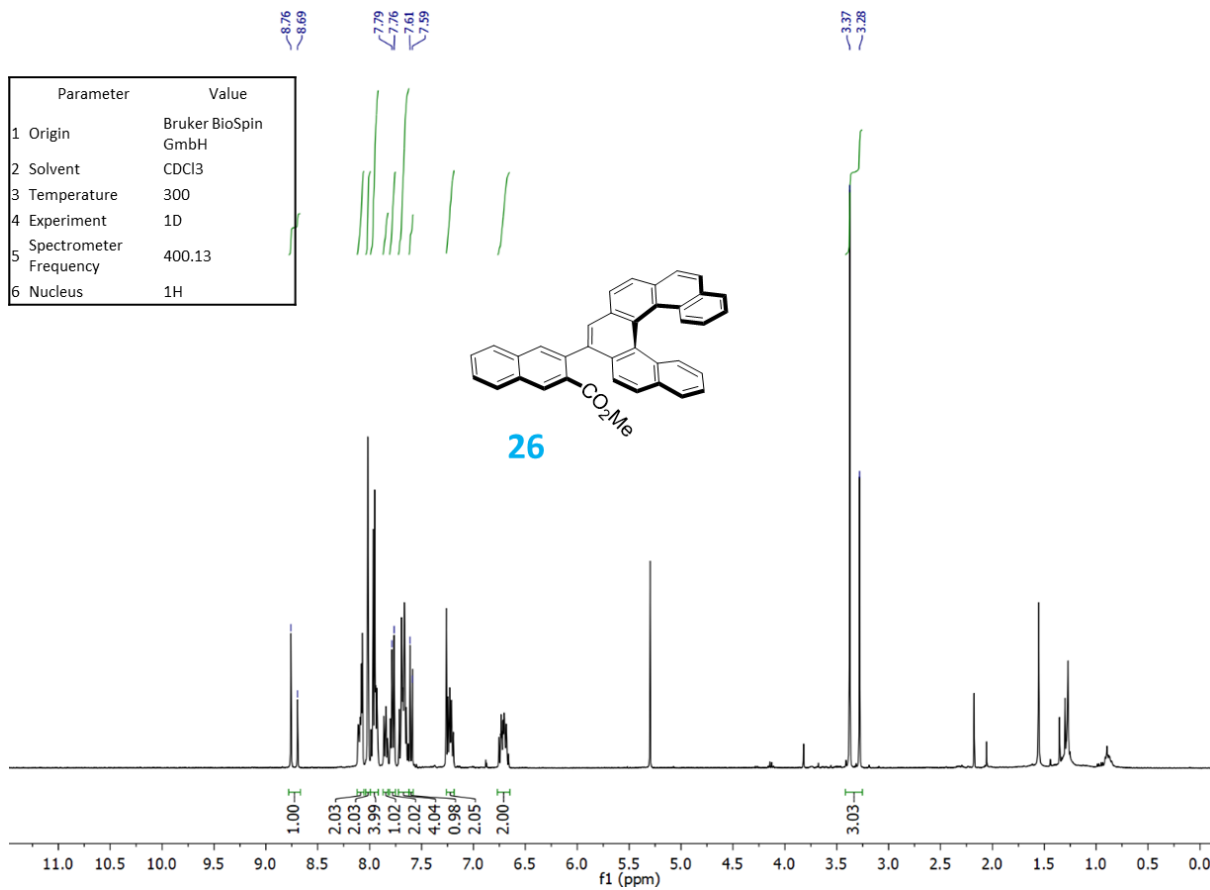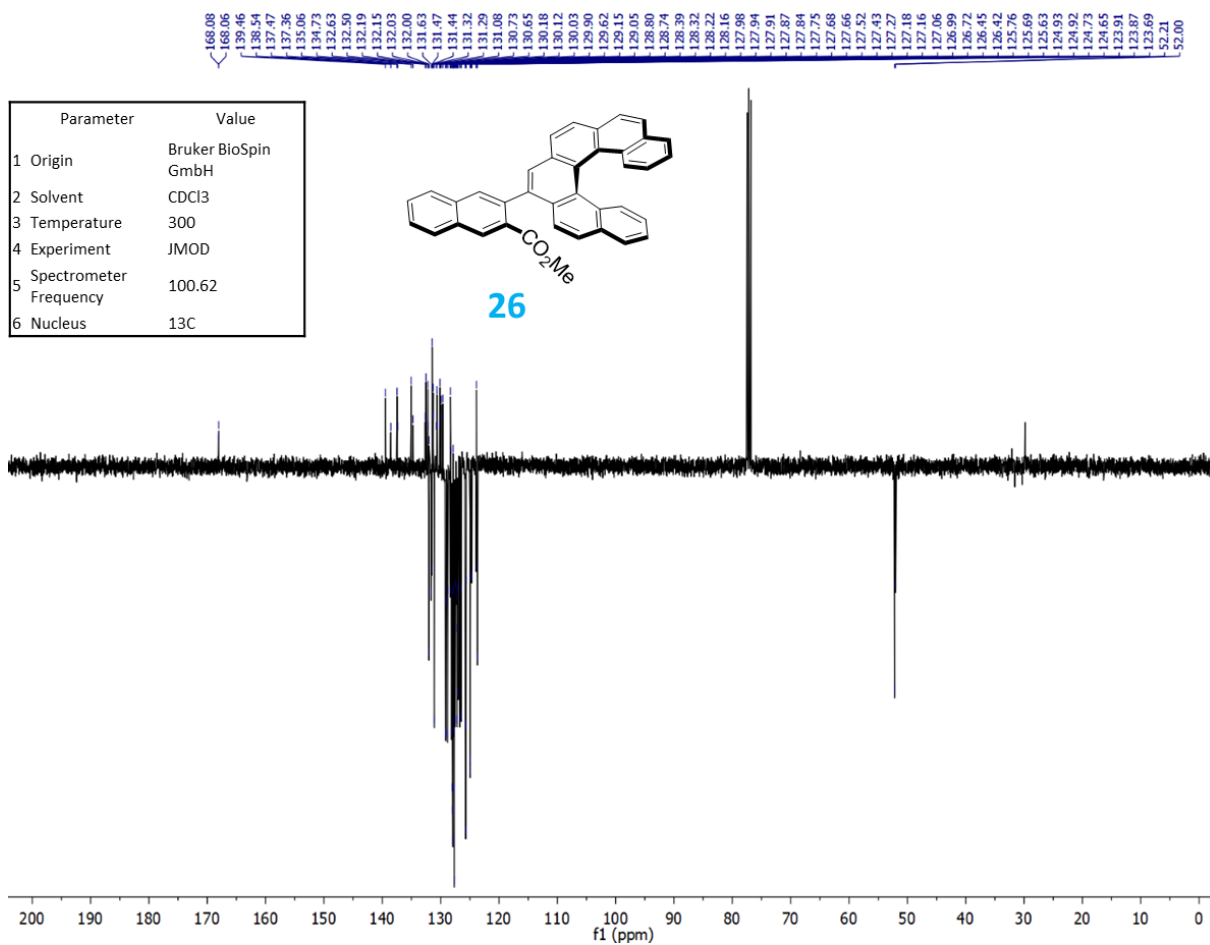

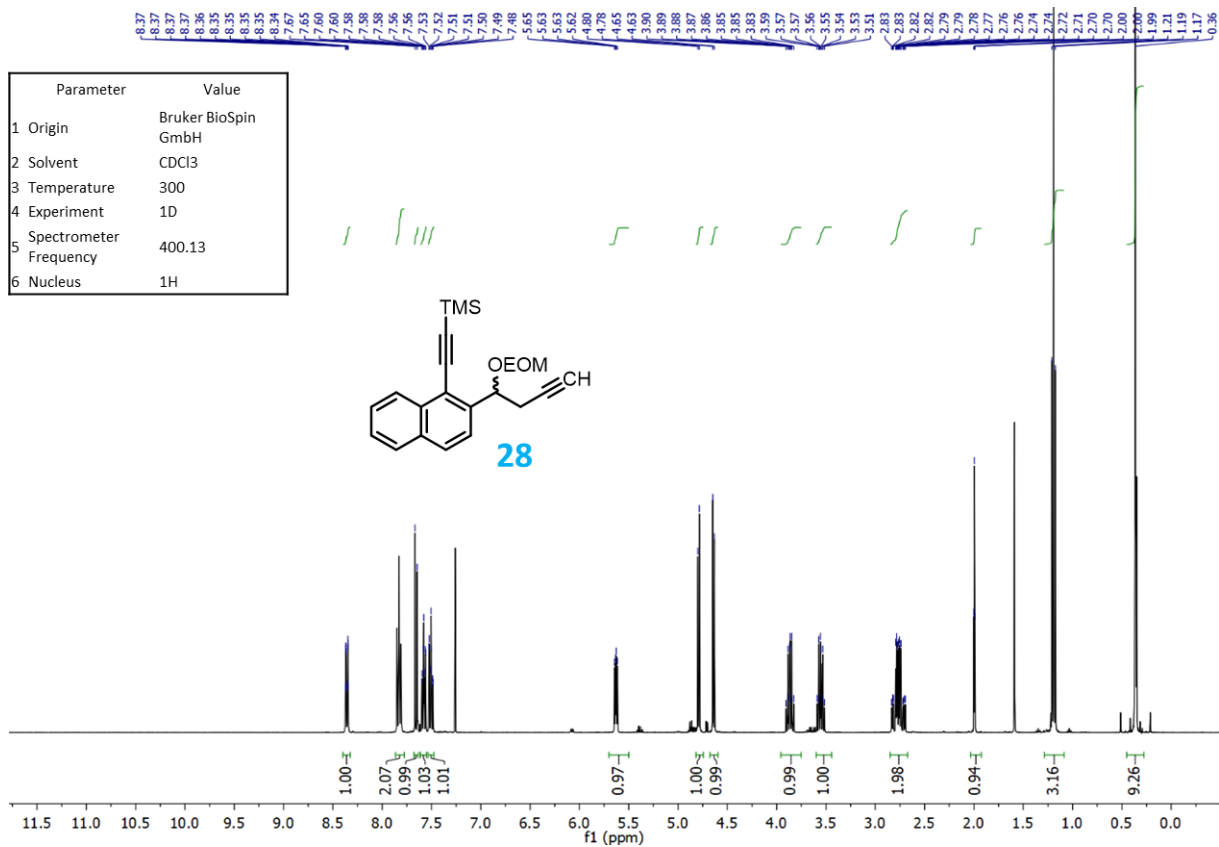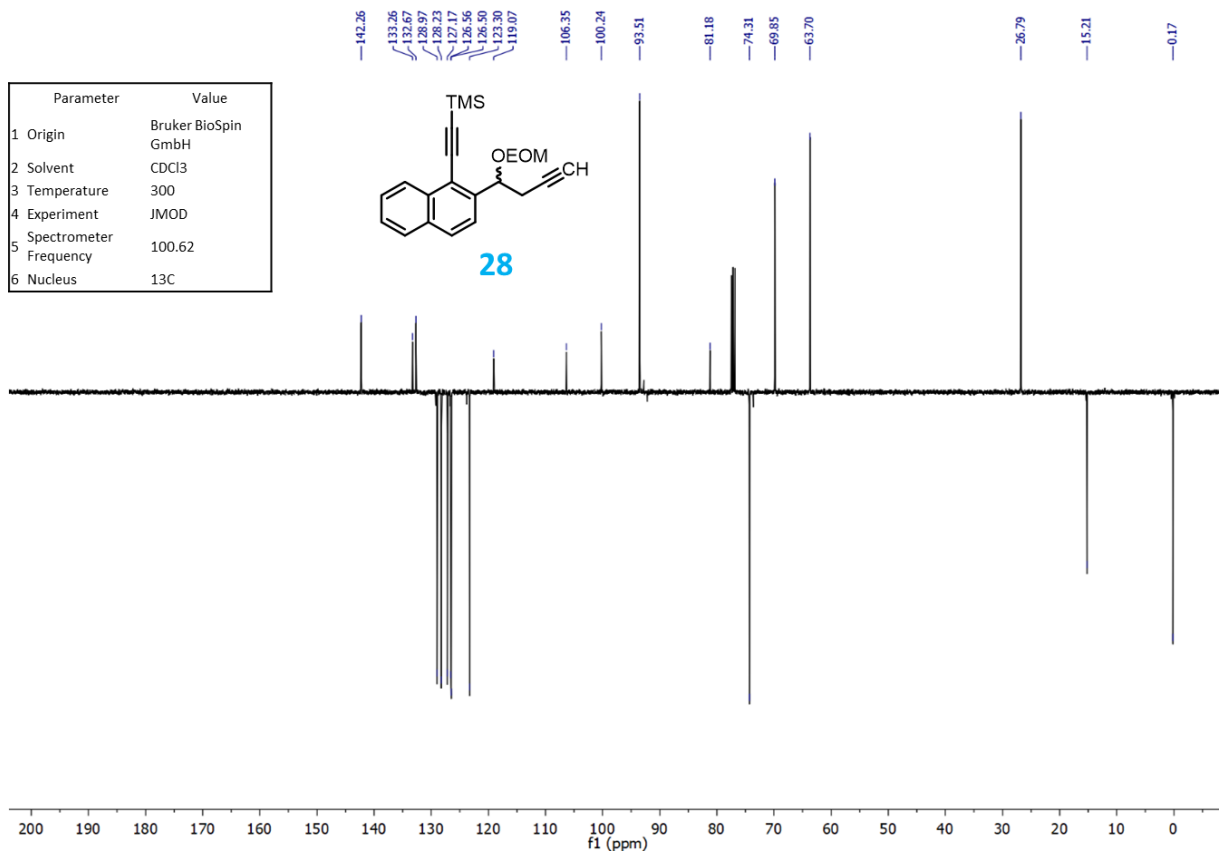



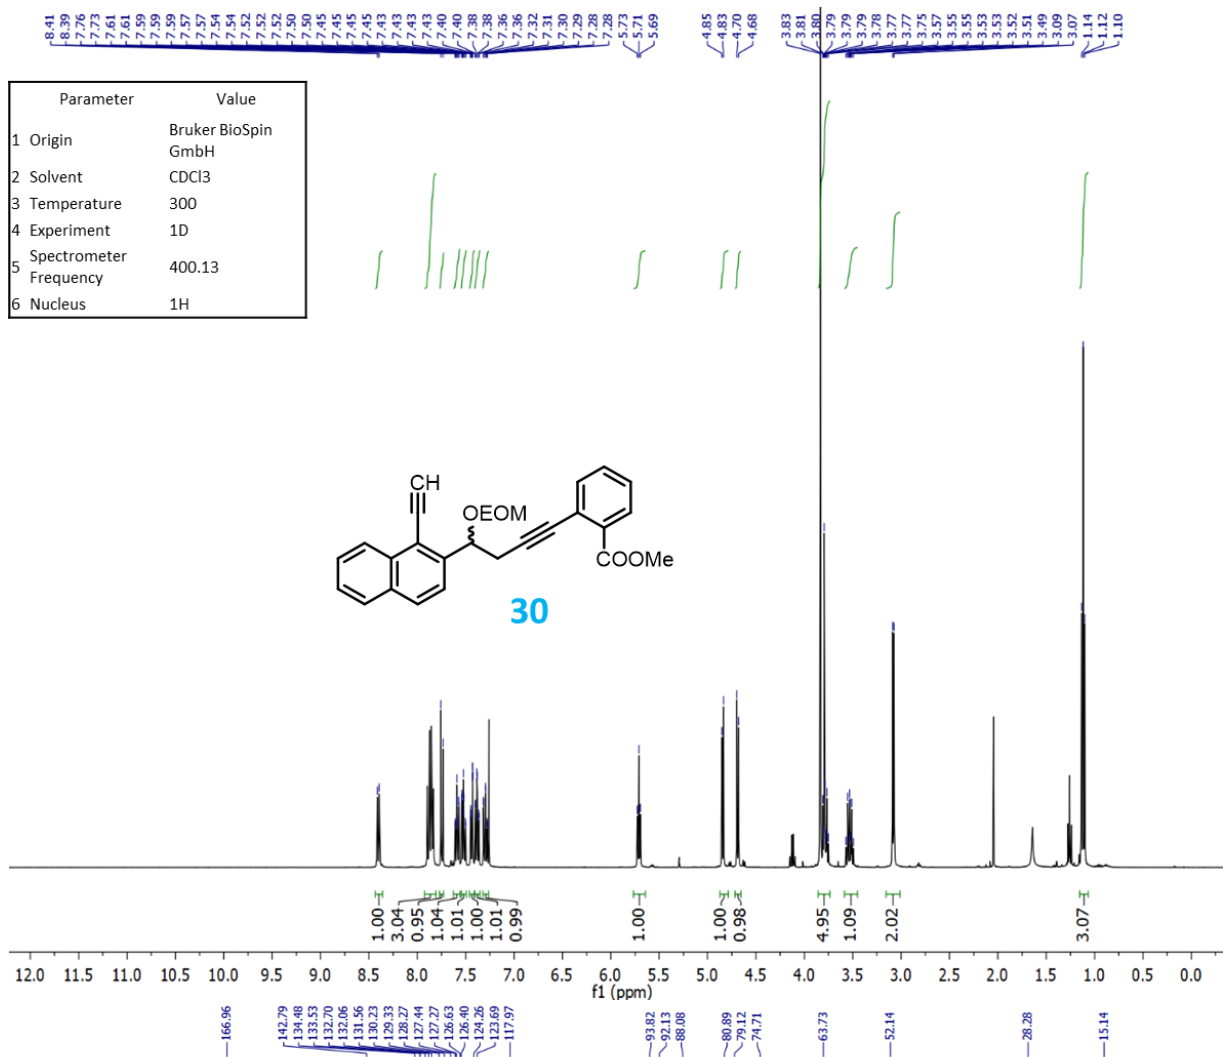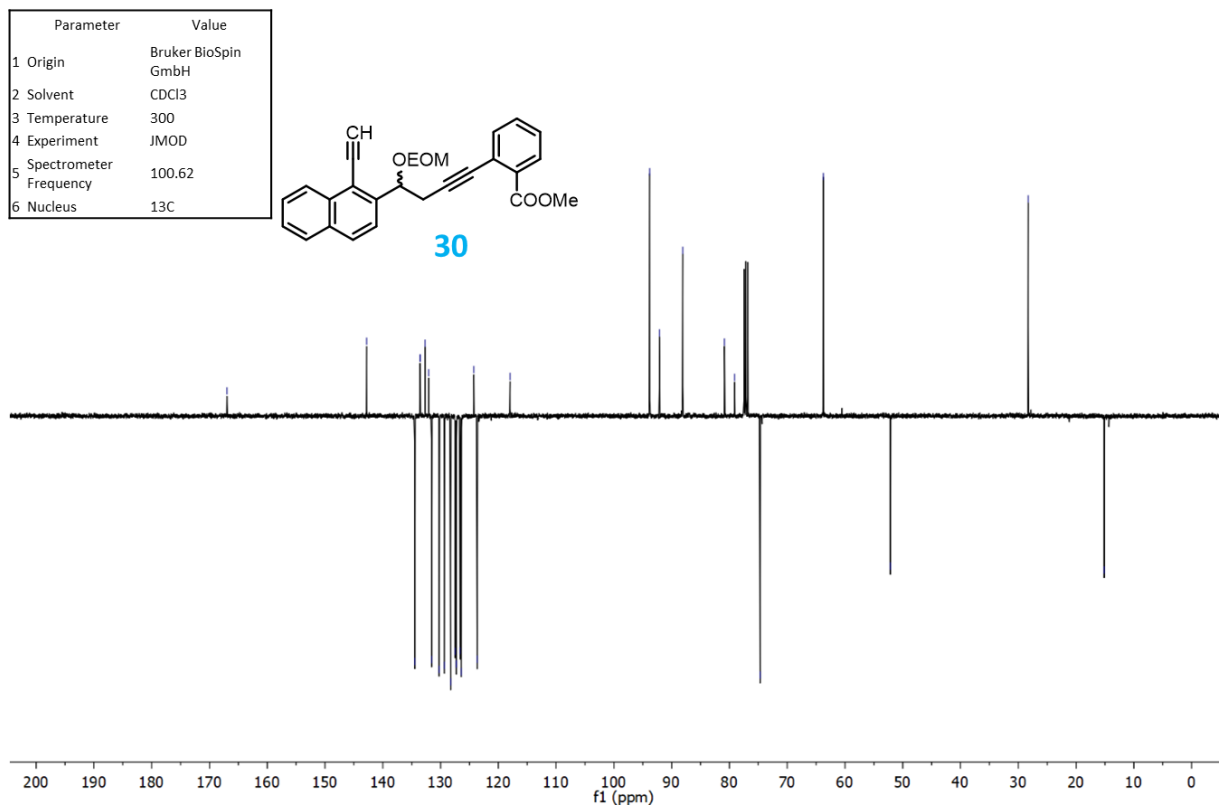

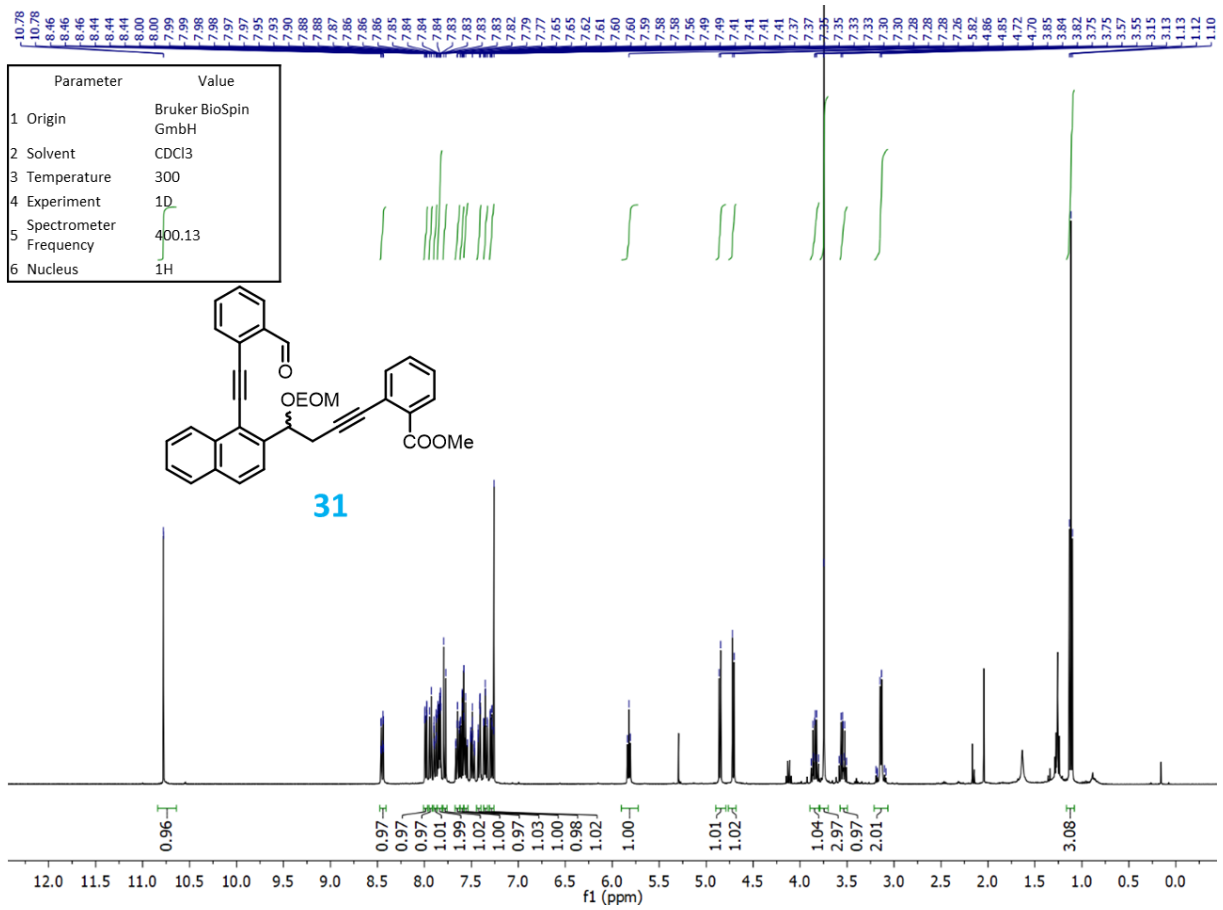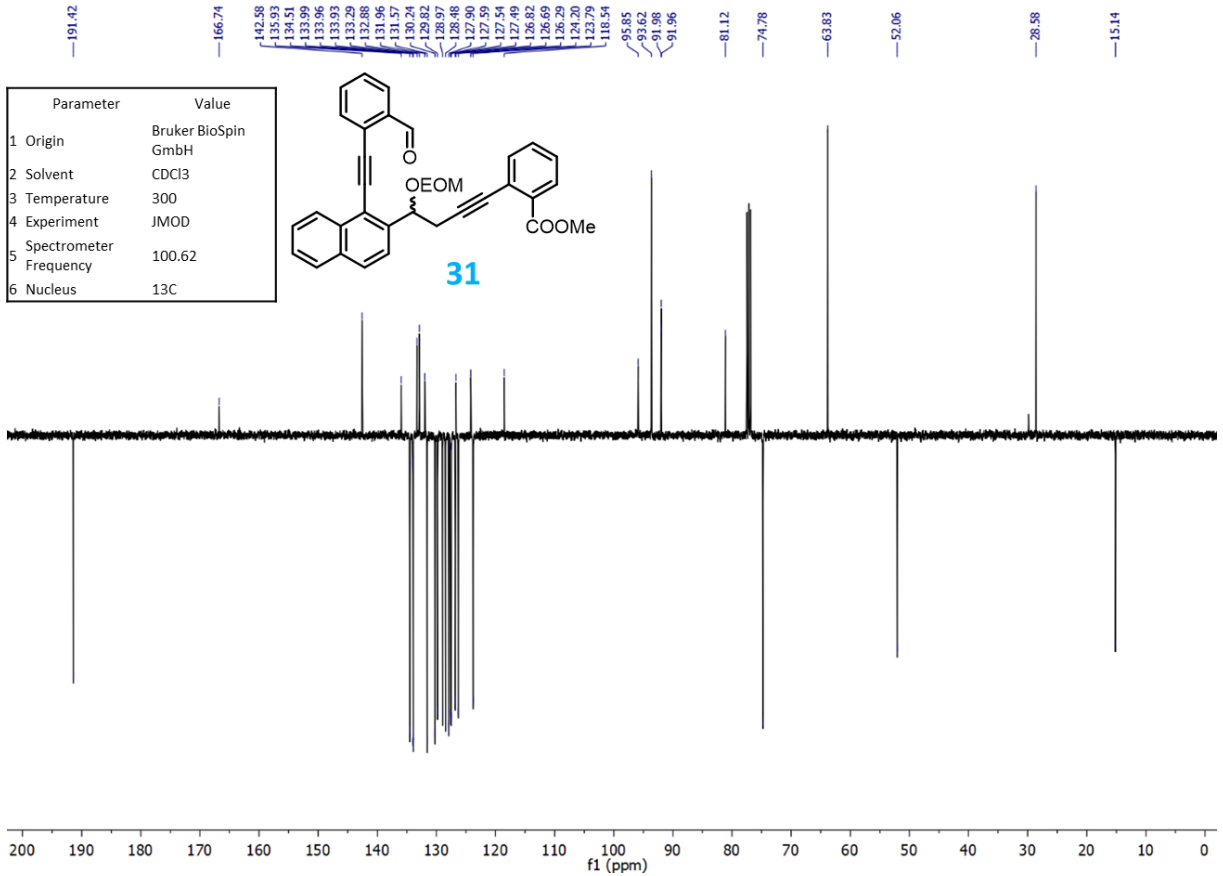



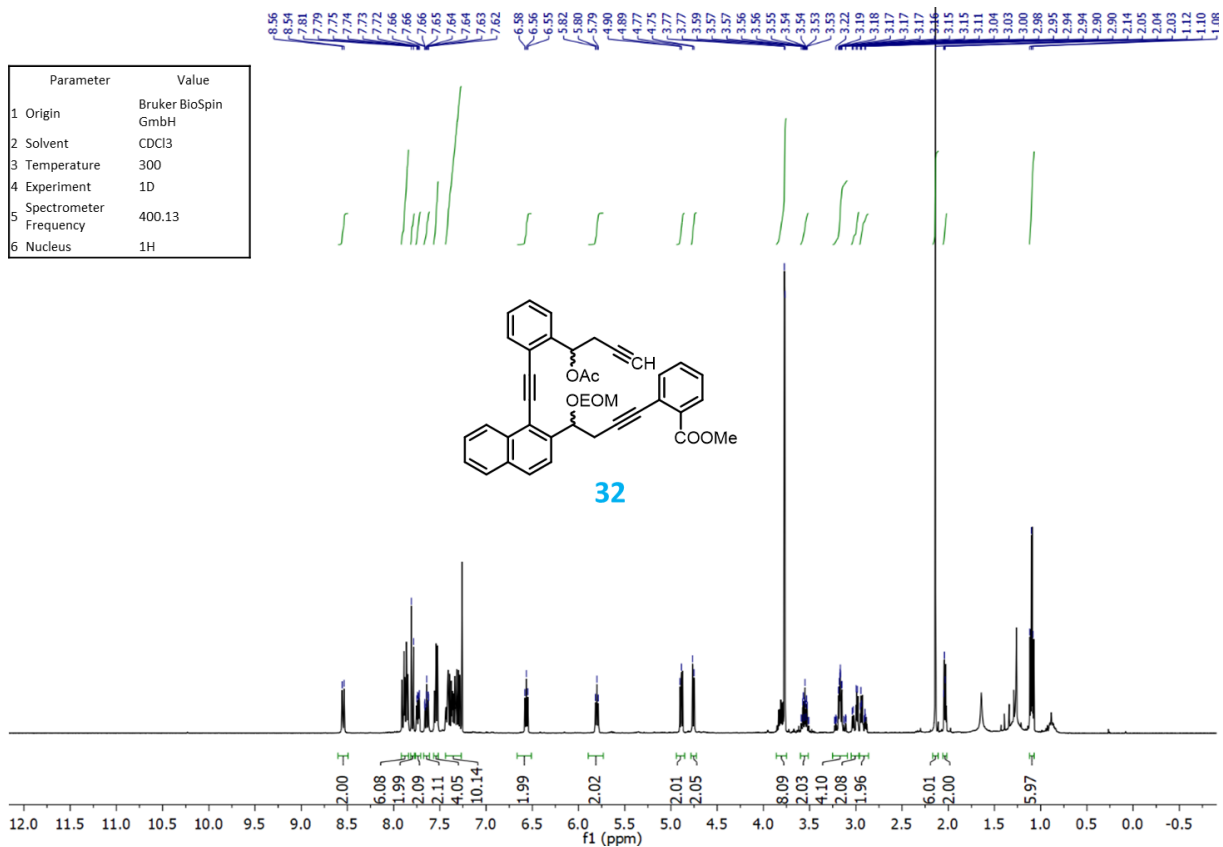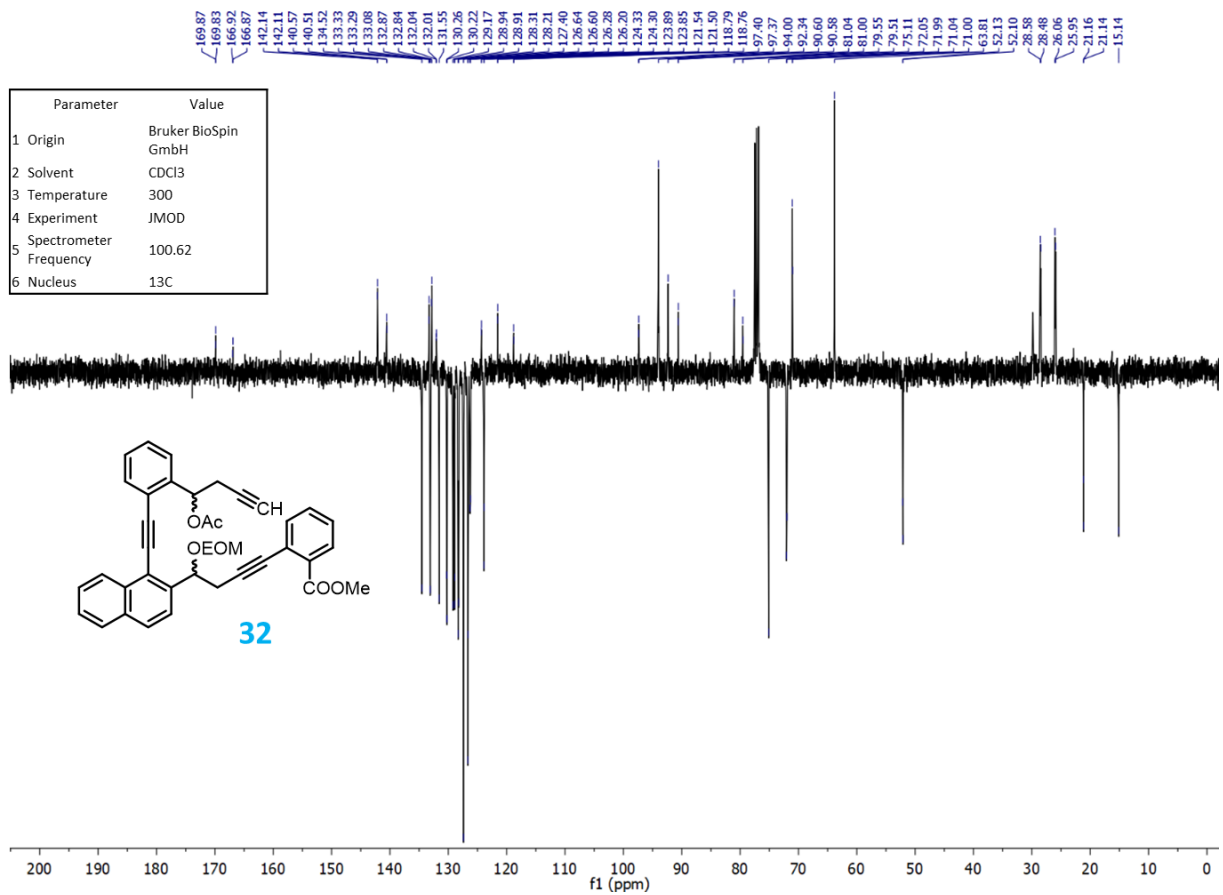

| Parameter                | Value               |
|--------------------------|---------------------|
| 1 Origin                 | Bruker BioSpin GmbH |
| 2 Solvent                | CDCl3               |
| 3 Temperature            | 300                 |
| 4 Experiment             | 1D                  |
| 5 Spectrometer Frequency | 400.13              |
| 6 Nucleus                | 1H                  |

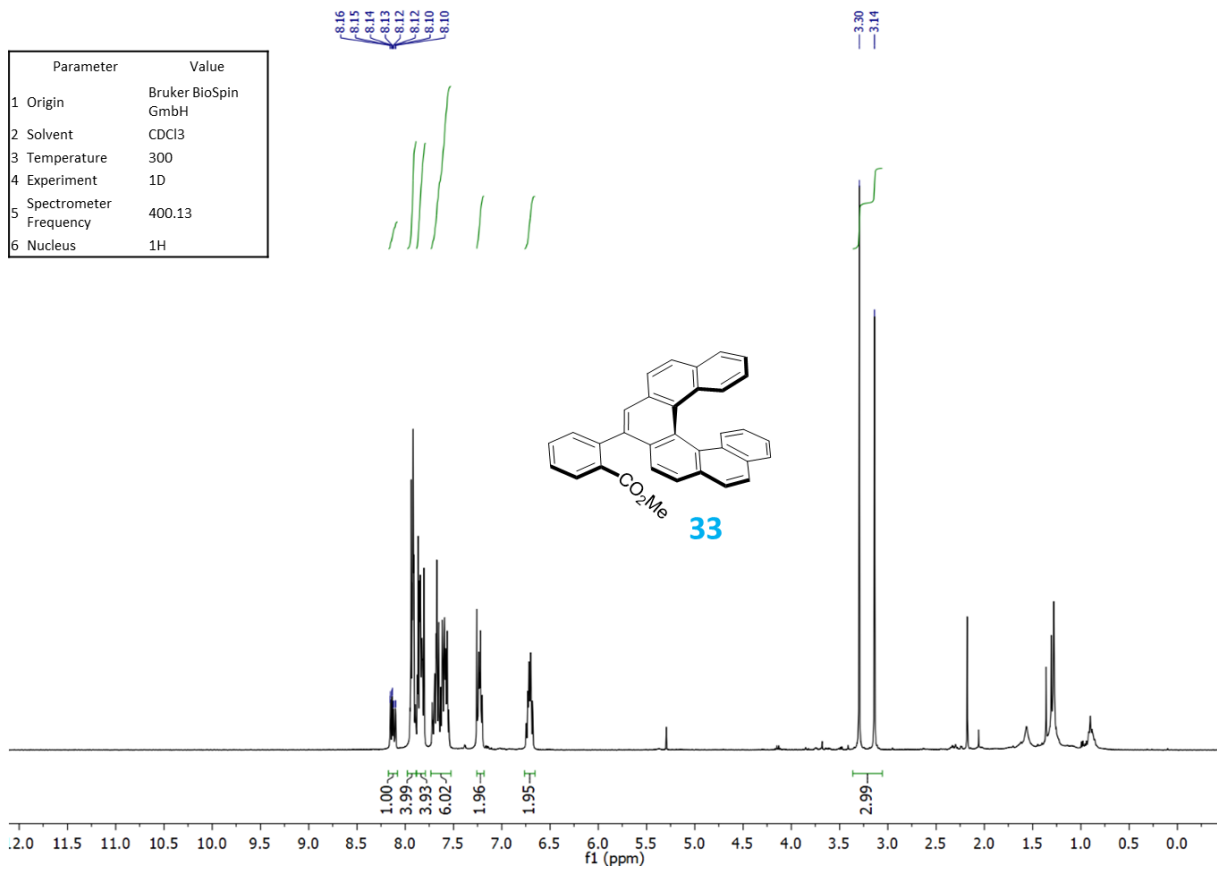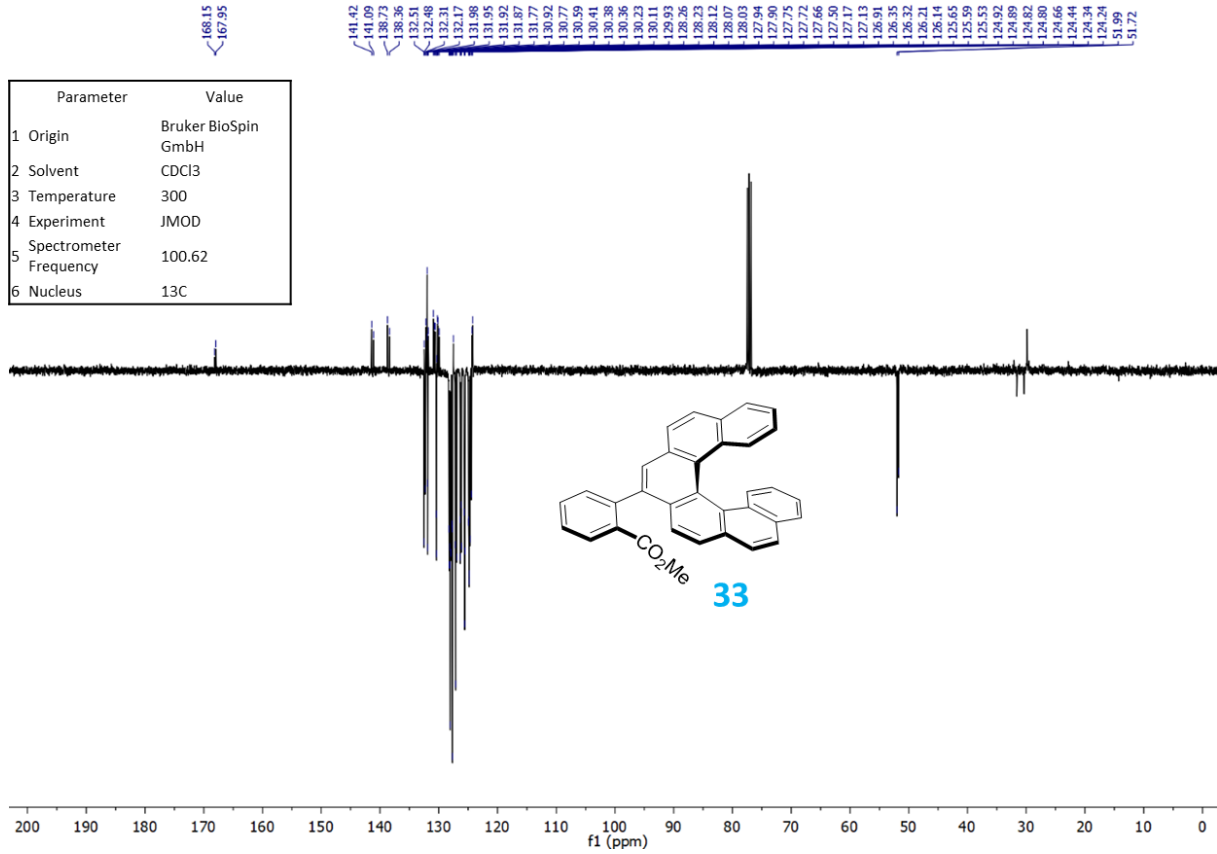

| Parameter                | Value               |
|--------------------------|---------------------|
| 1 Origin                 | Bruker BioSpin GmbH |
| 2 Solvent                | CDCl3               |
| 3 Temperature            | 300                 |
| 4 Experiment             | JMOD                |
| 5 Spectrometer Frequency | 100.62              |
| 6 Nucleus                | 13C                 |

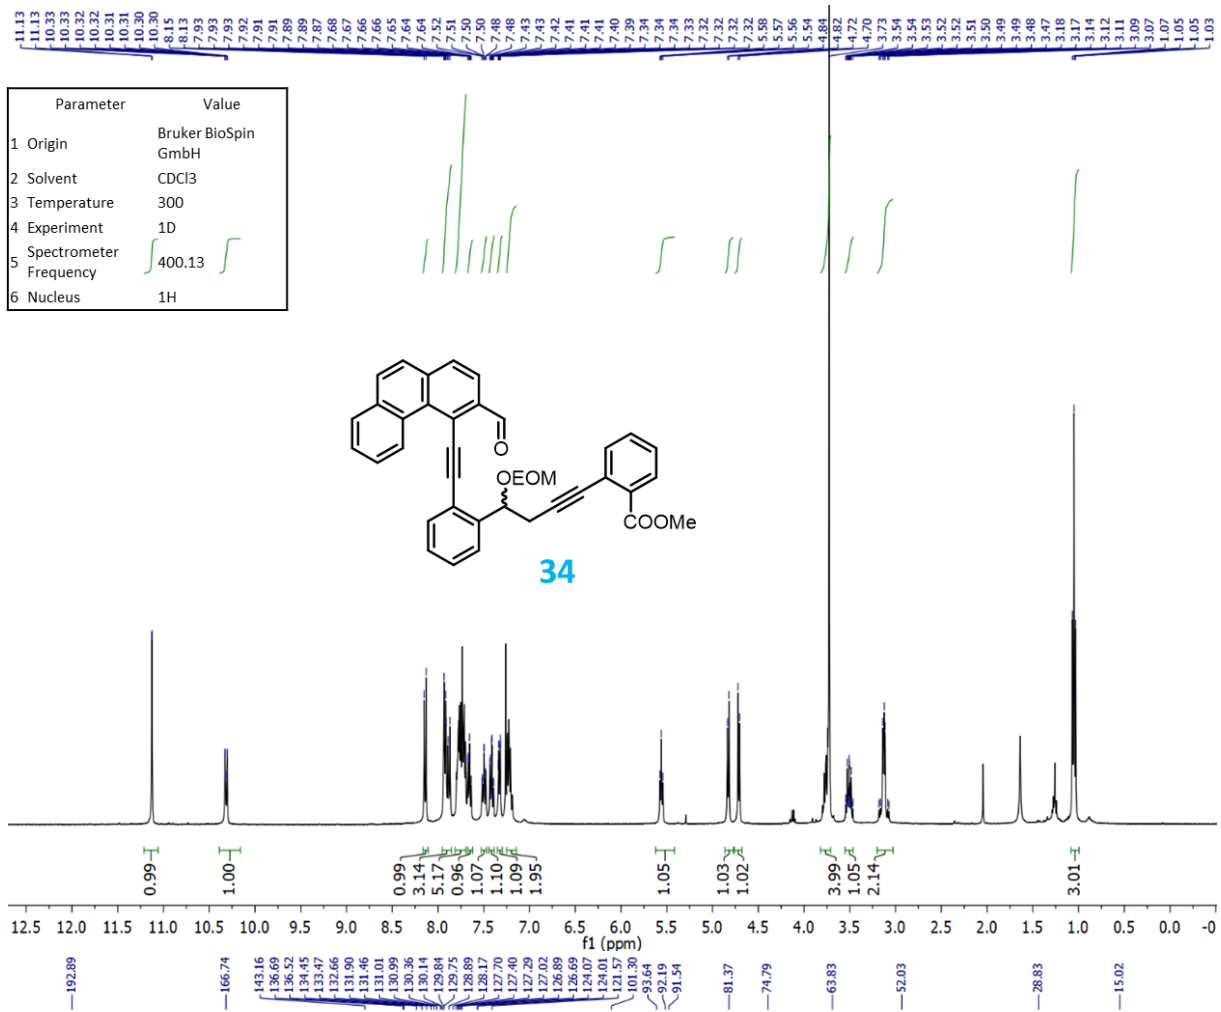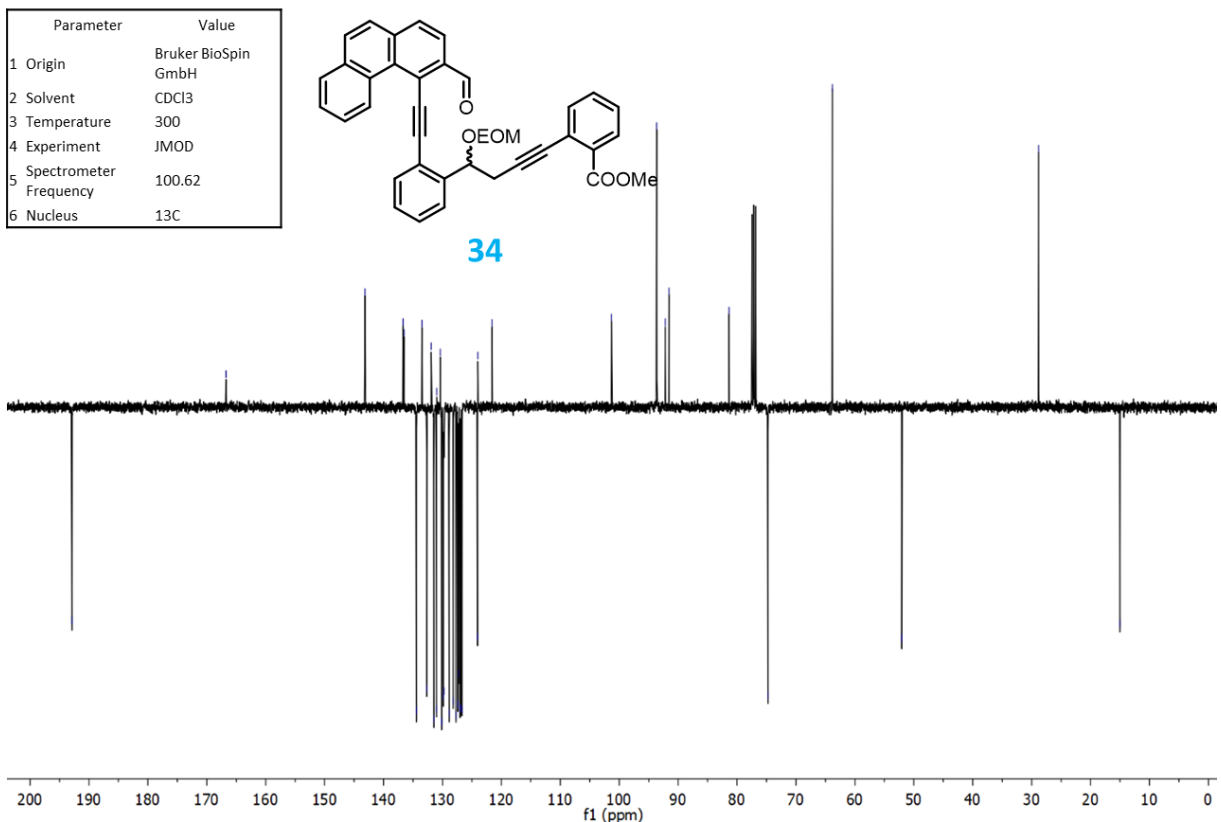

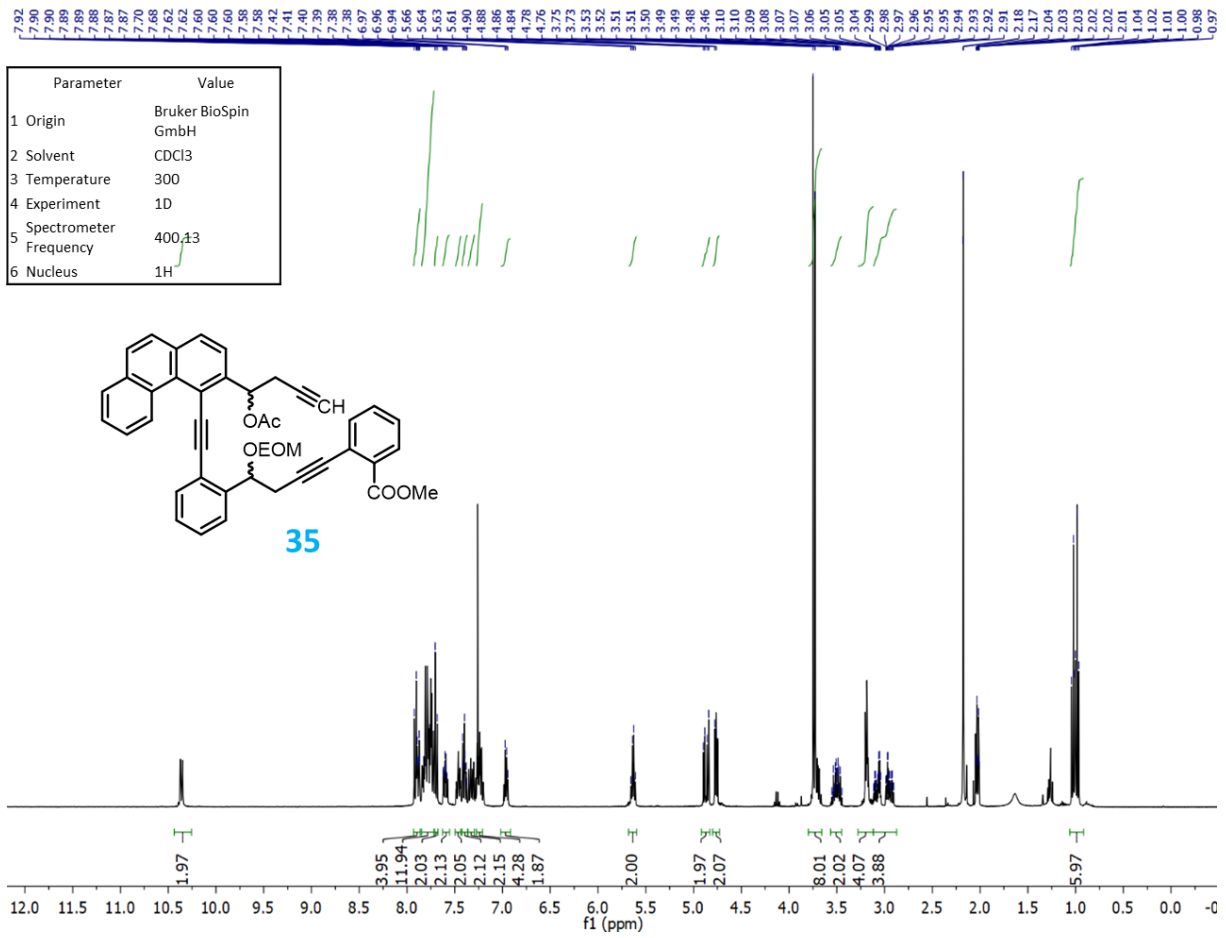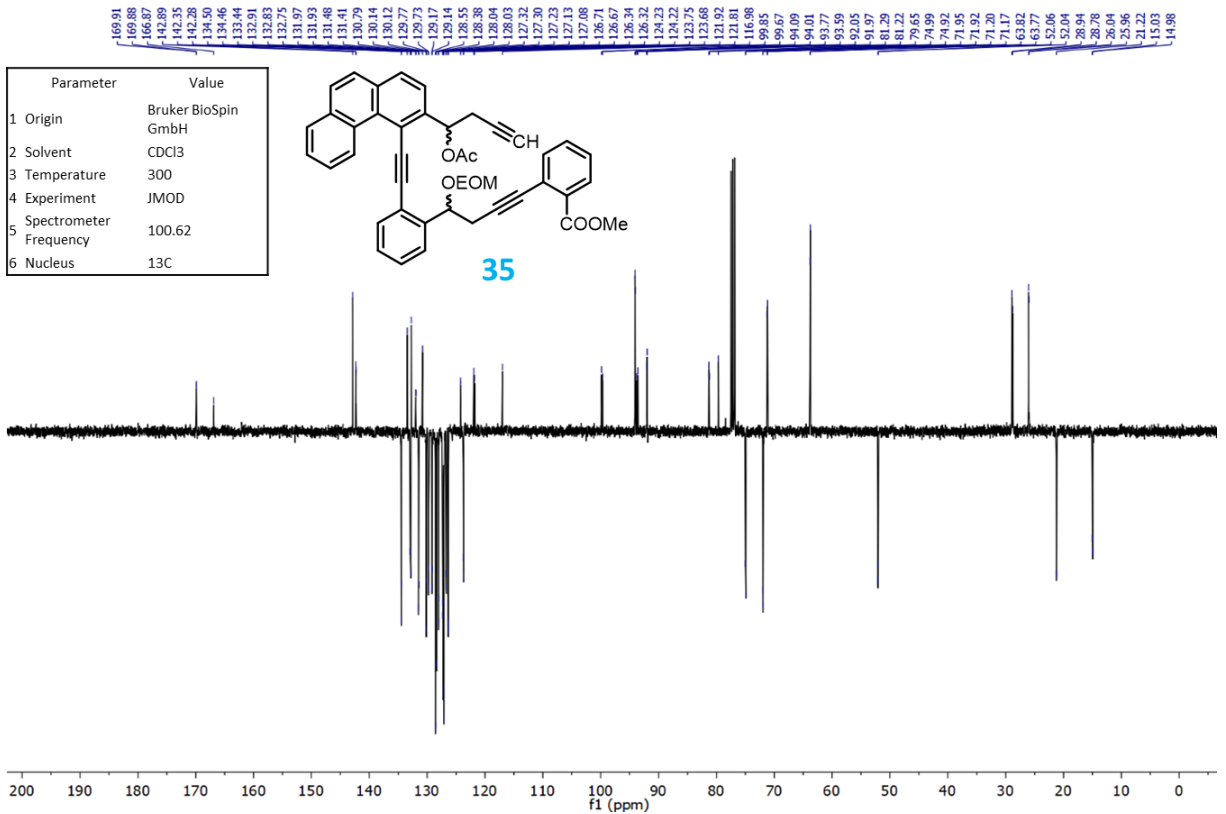

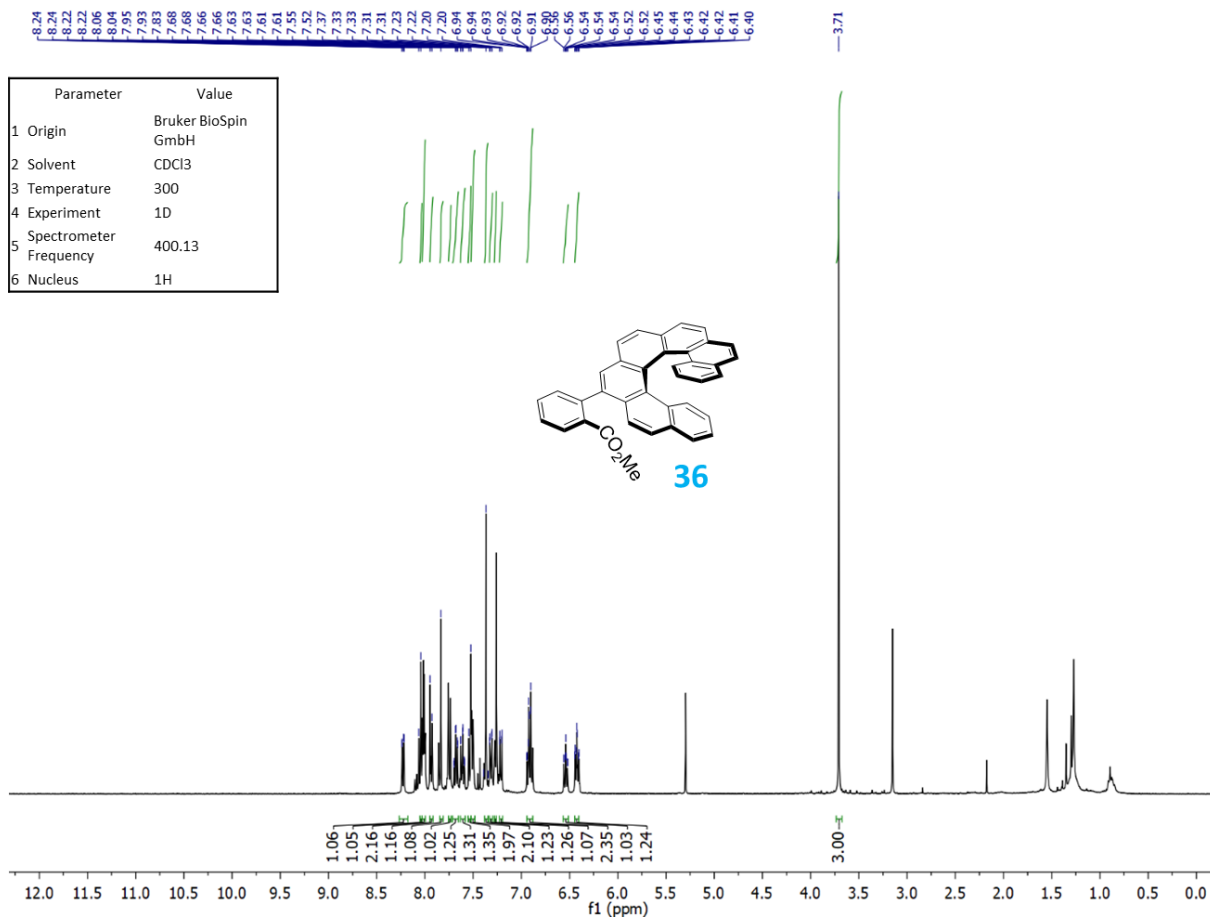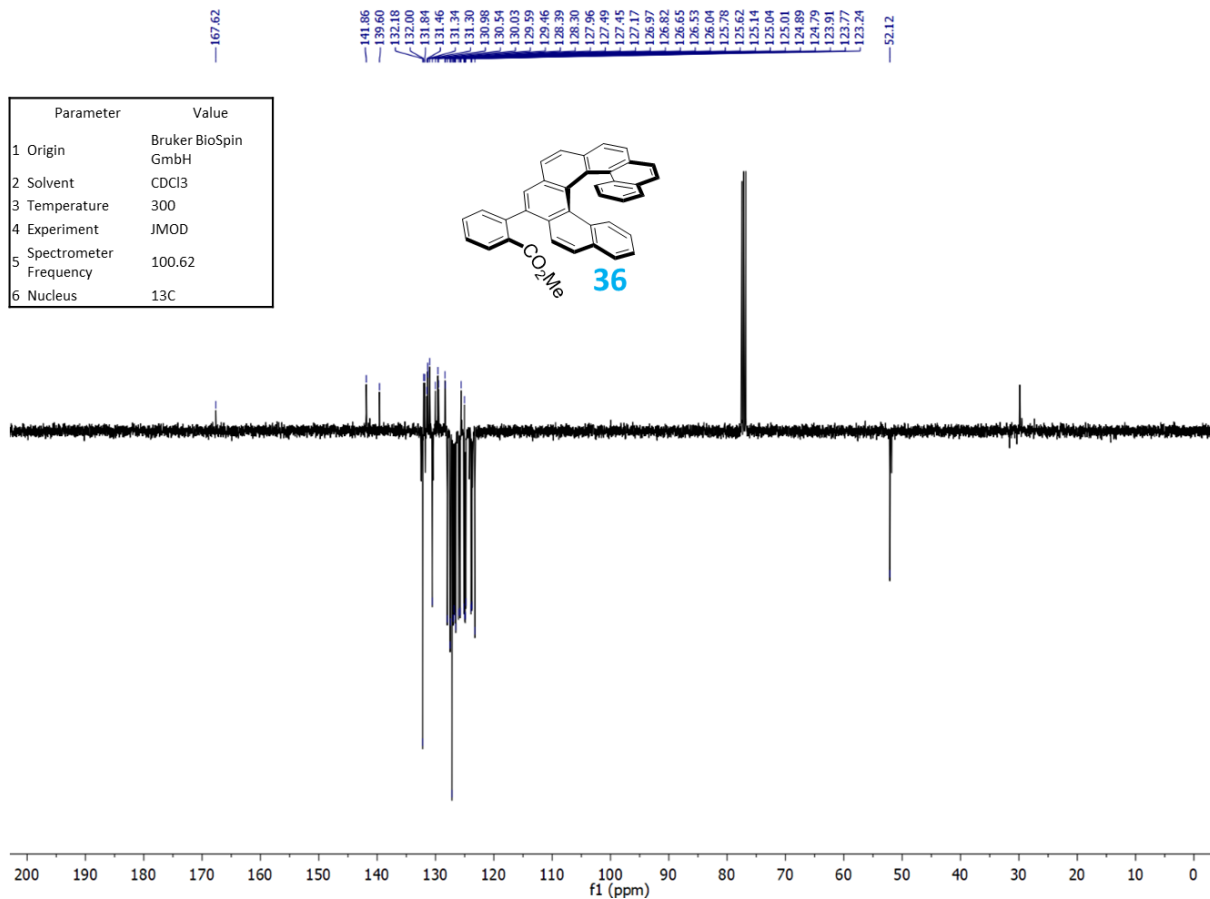

| Parameter                | Value  |
|--------------------------|--------|
| 1 Origin                 | JEOL   |
| 2 Solvent                | CDCl3  |
| 3 Temperature            | 297    |
| 4 Experiment             | 1D     |
| 5 Spectrometer Frequency | 399.78 |
| 6 Nucleus                | 1H     |

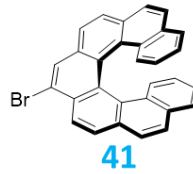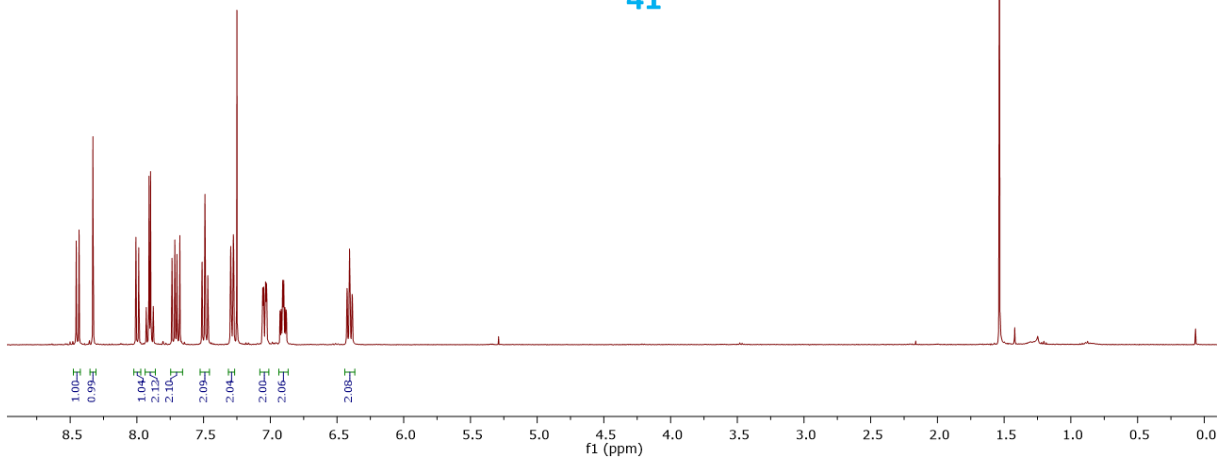

| Parameter                | Value  |
|--------------------------|--------|
| 1 Origin                 | JEOL   |
| 2 Solvent                | CD2Cl2 |
| 3 Temperature            | 297    |
| 4 Experiment             | 1D     |
| 5 Spectrometer Frequency | 399.78 |
| 6 Nucleus                | 1H     |

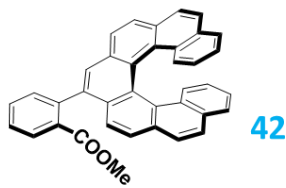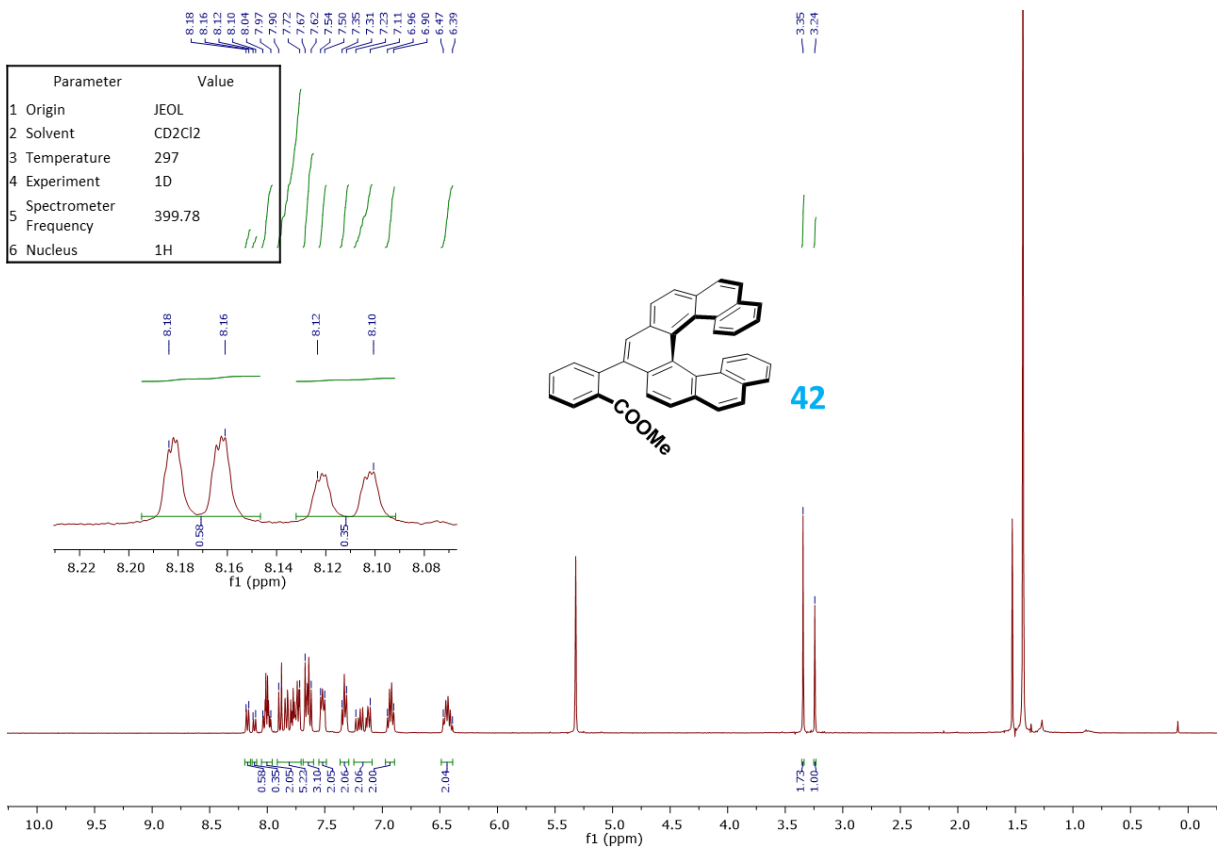

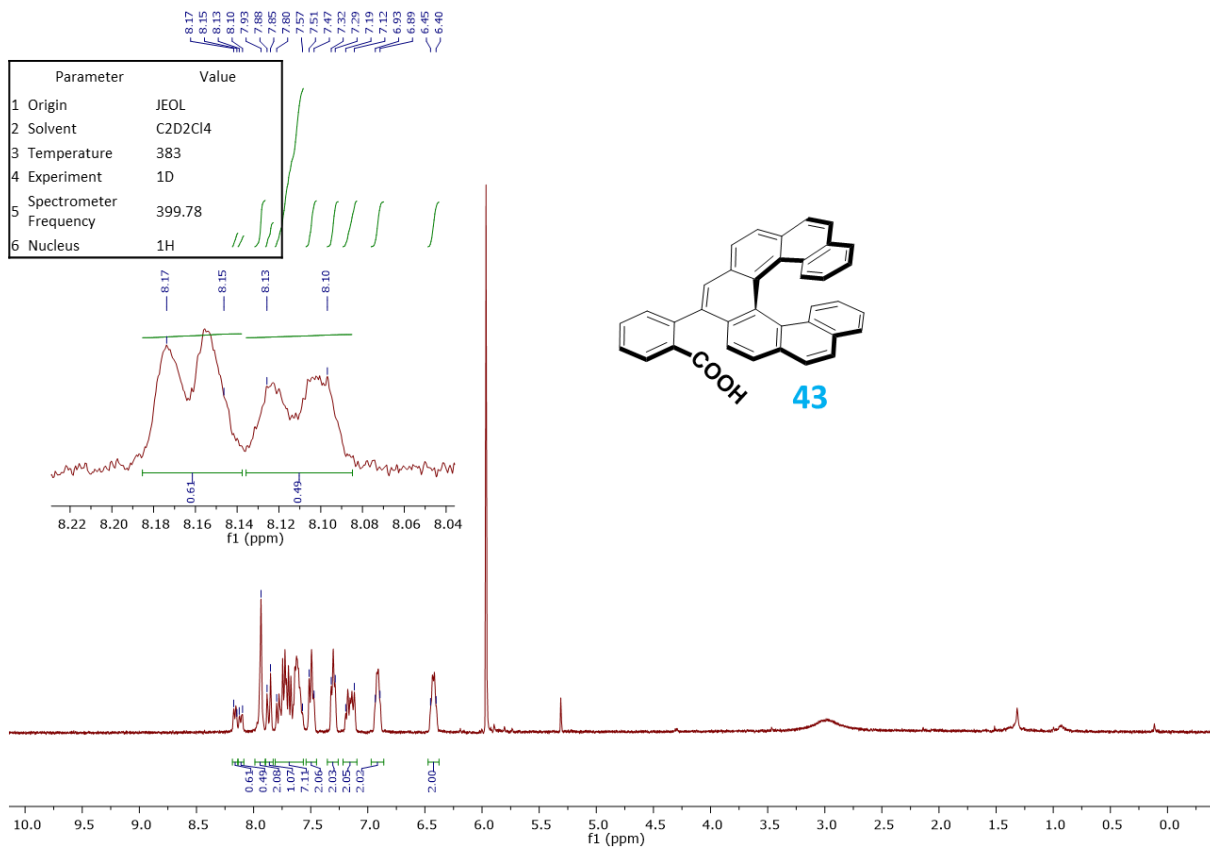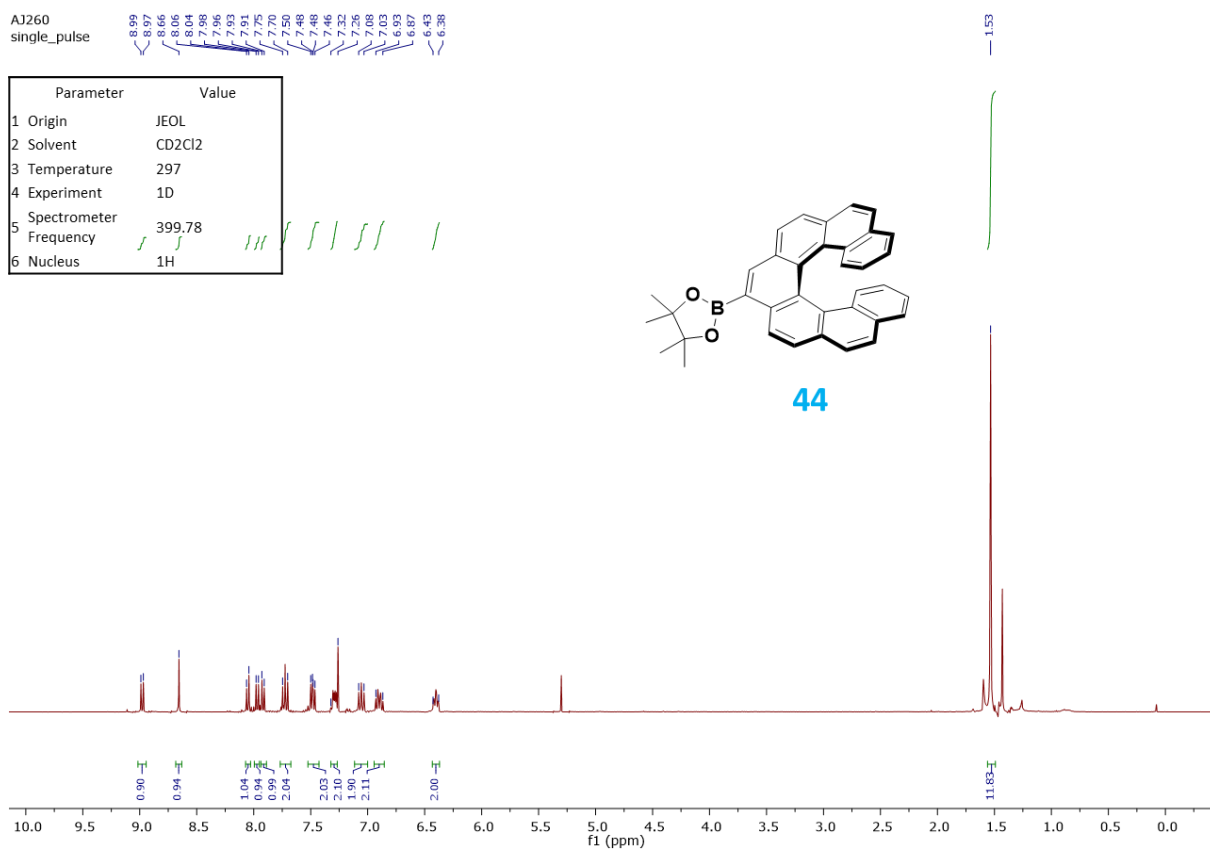

AJ263\_B  
single\_pulse

| Parameter      | Value  |
|----------------|--------|
| 1 Origin       | JEOL   |
| 2 Solvent      | CD2Cl2 |
| 3 Temperature  | 297    |
| 4 Experiment   | 1D     |
| 5 Spectrometer | 399.78 |
| 6 Nucleus      | 1H     |

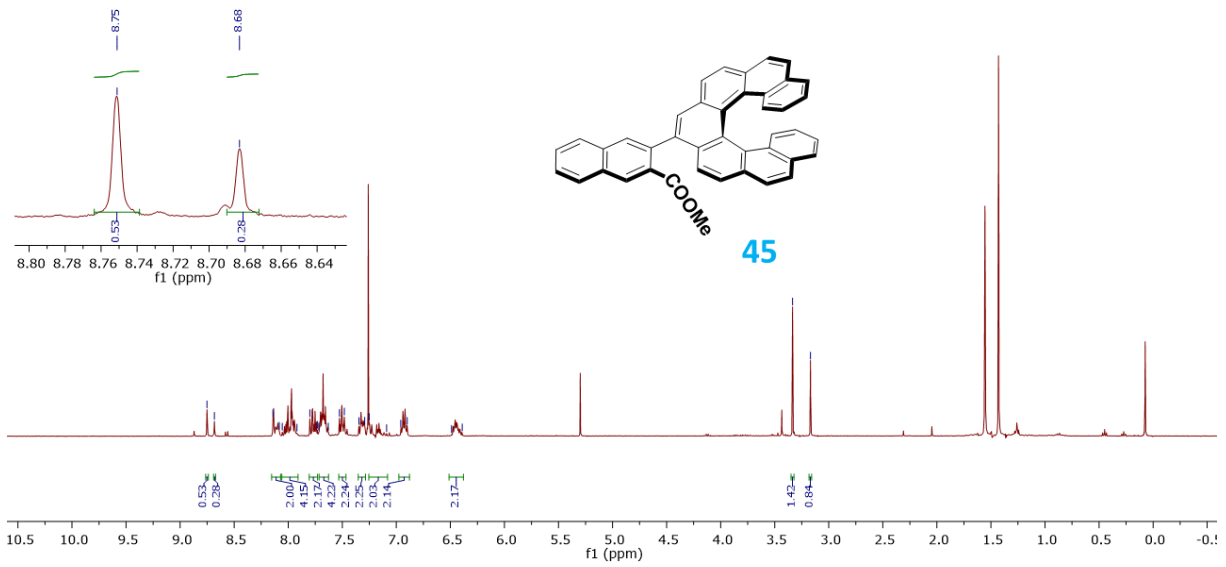

AJ269  
single\_pulse

| Parameter      | Value   |
|----------------|---------|
| 1 Origin       | JEOL    |
| 2 Solvent      | C2D2Cl4 |
| 3 Temperature  | 383     |
| 4 Experiment   | 1D      |
| 5 Spectrometer | 399.78  |
| 6 Nucleus      | 1H      |

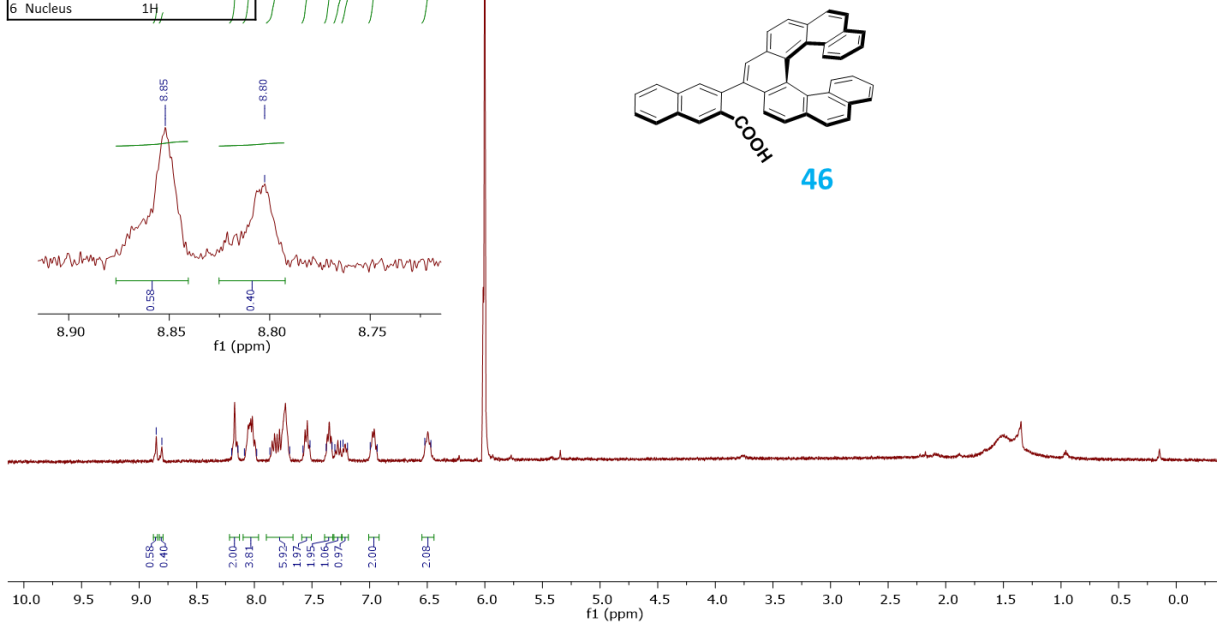



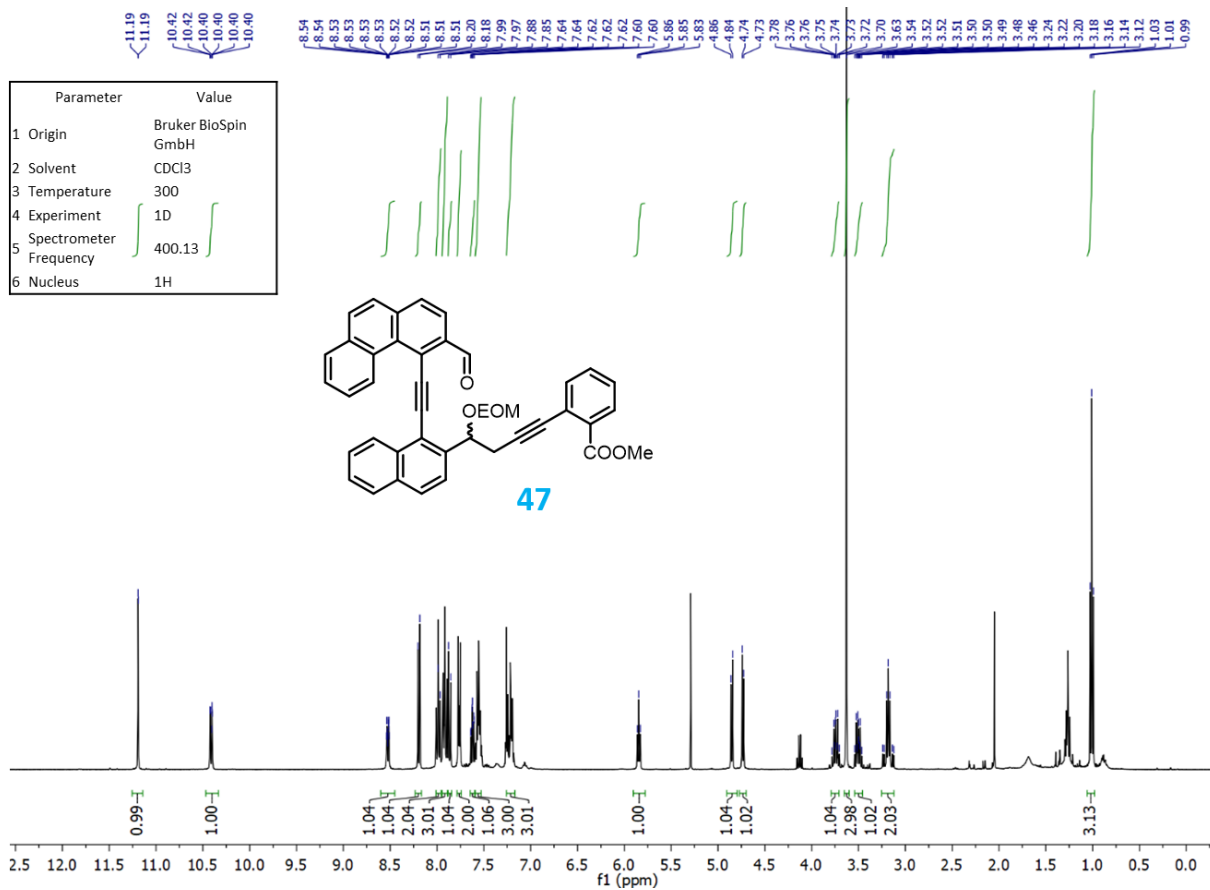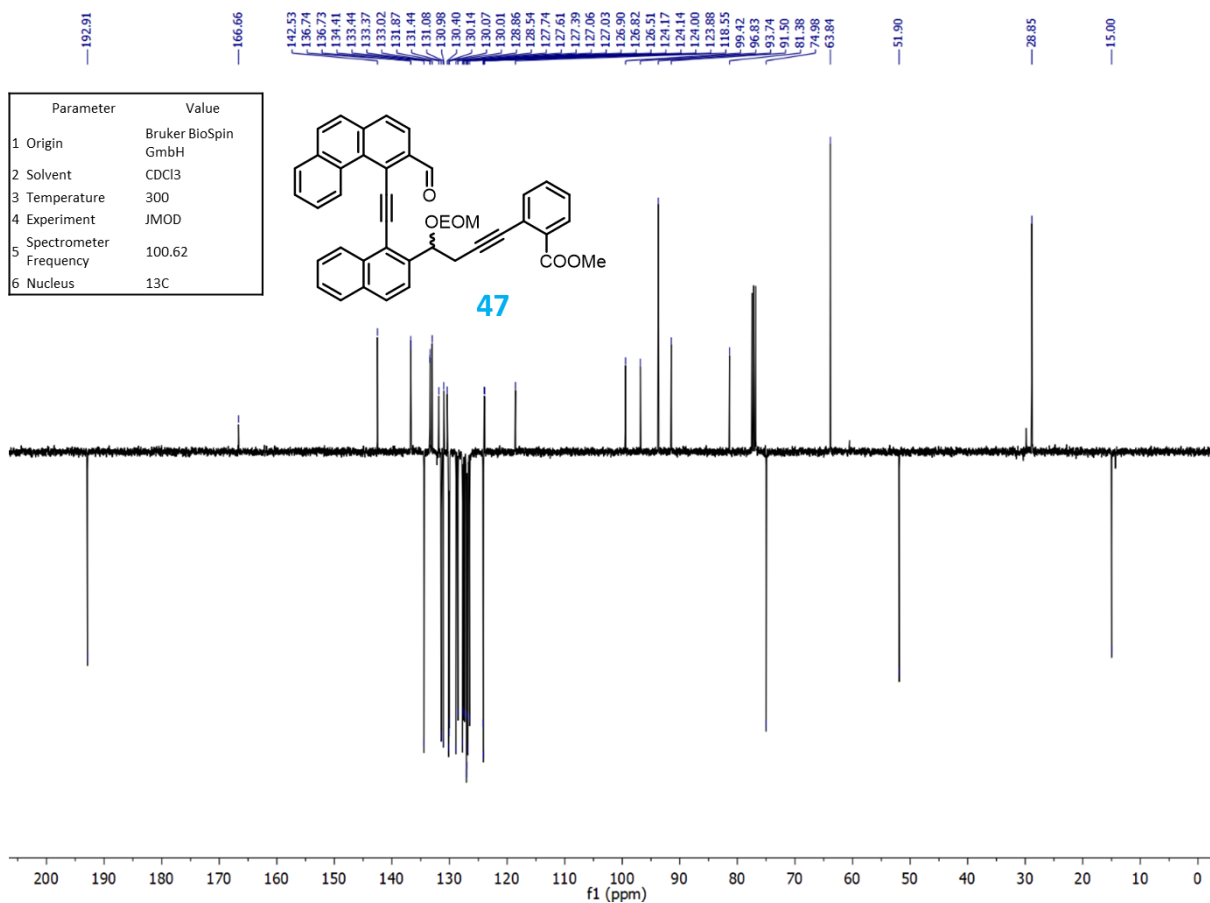

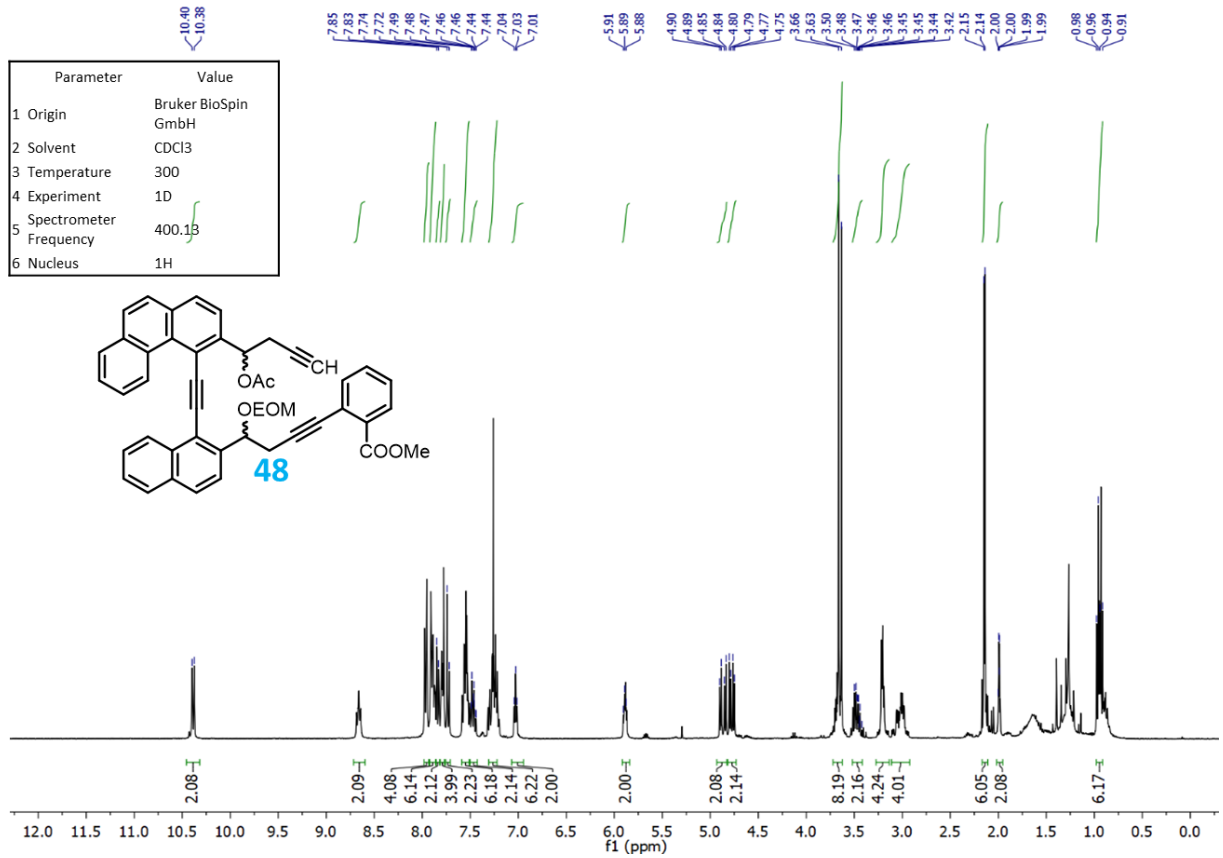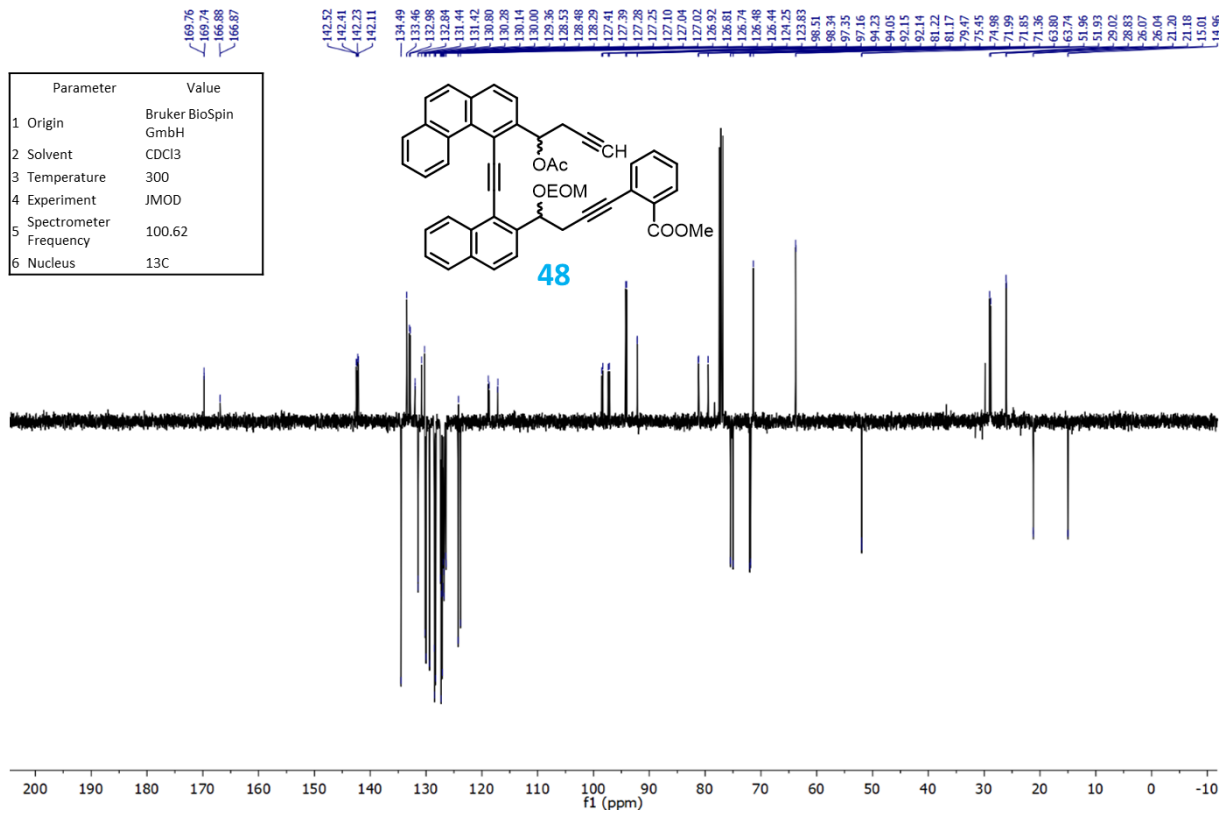

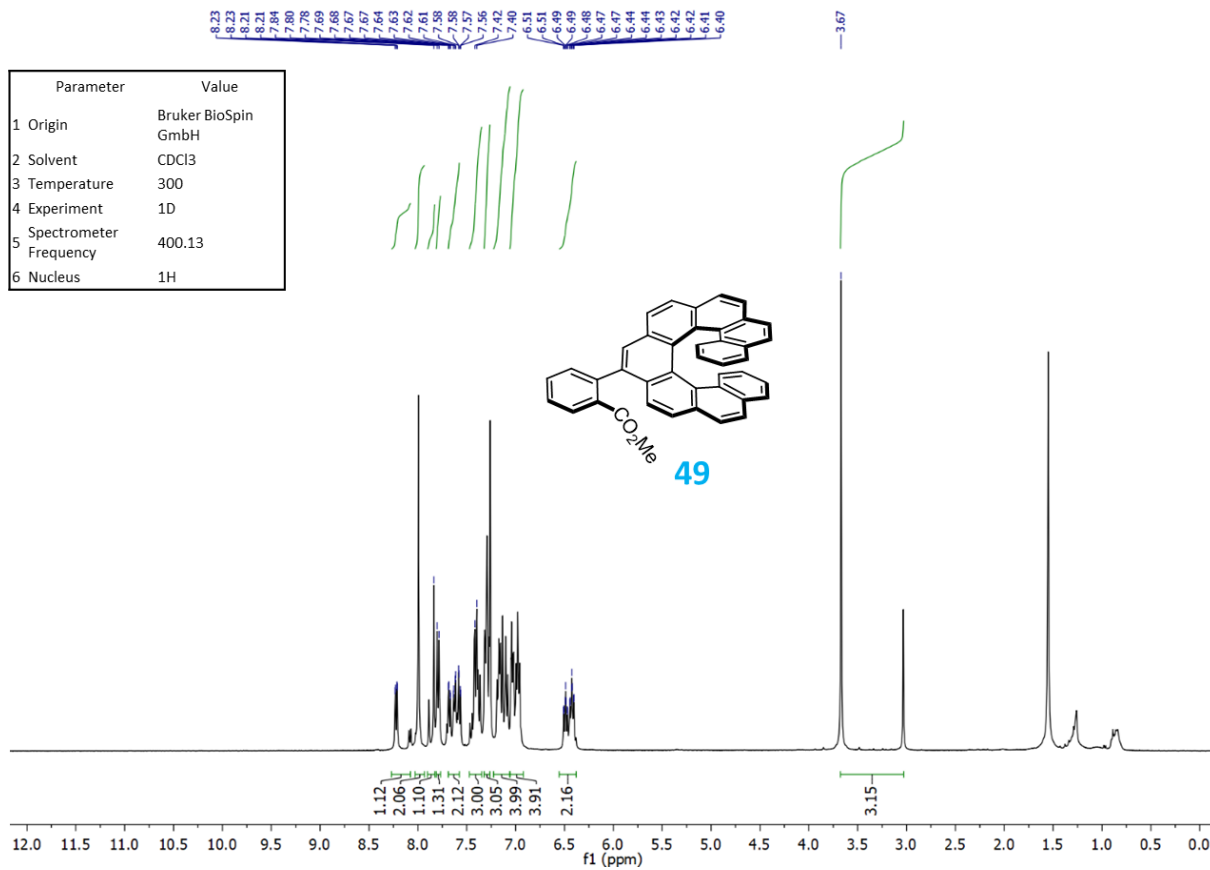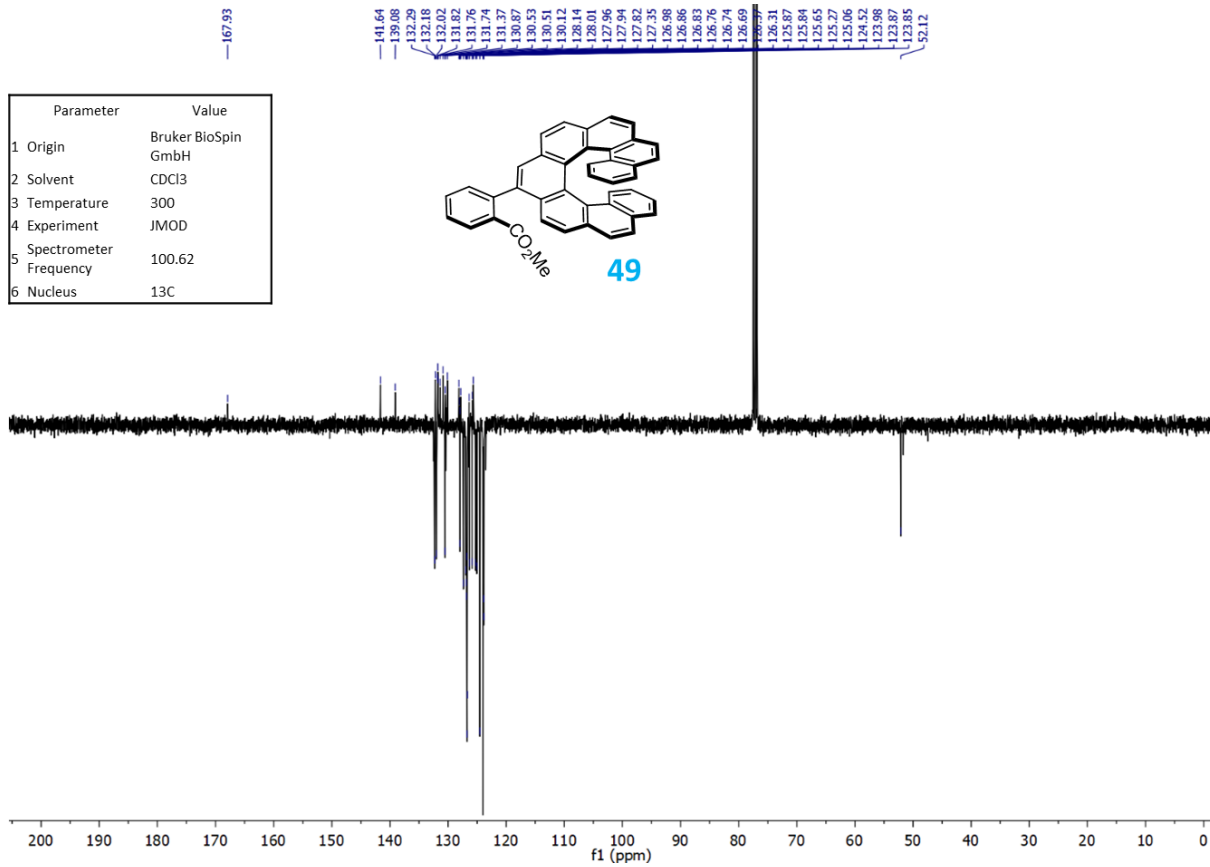

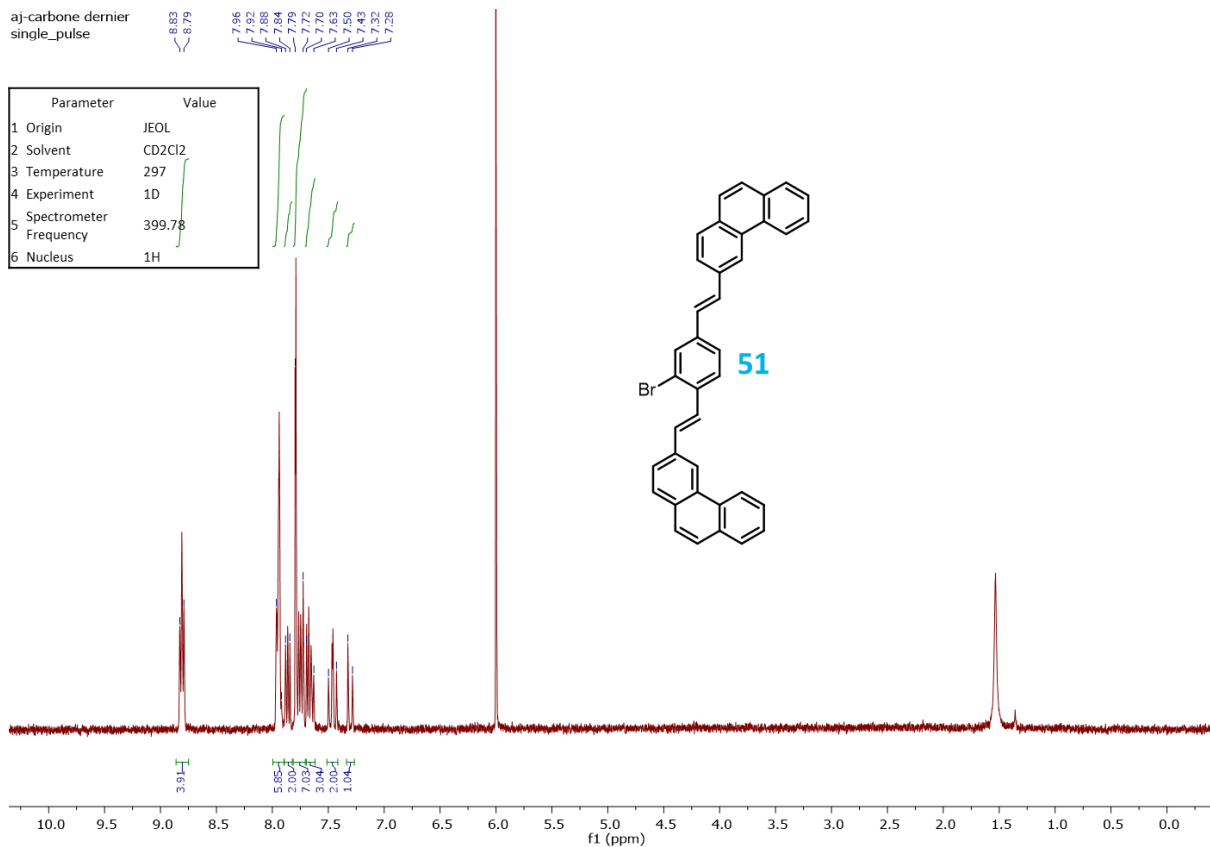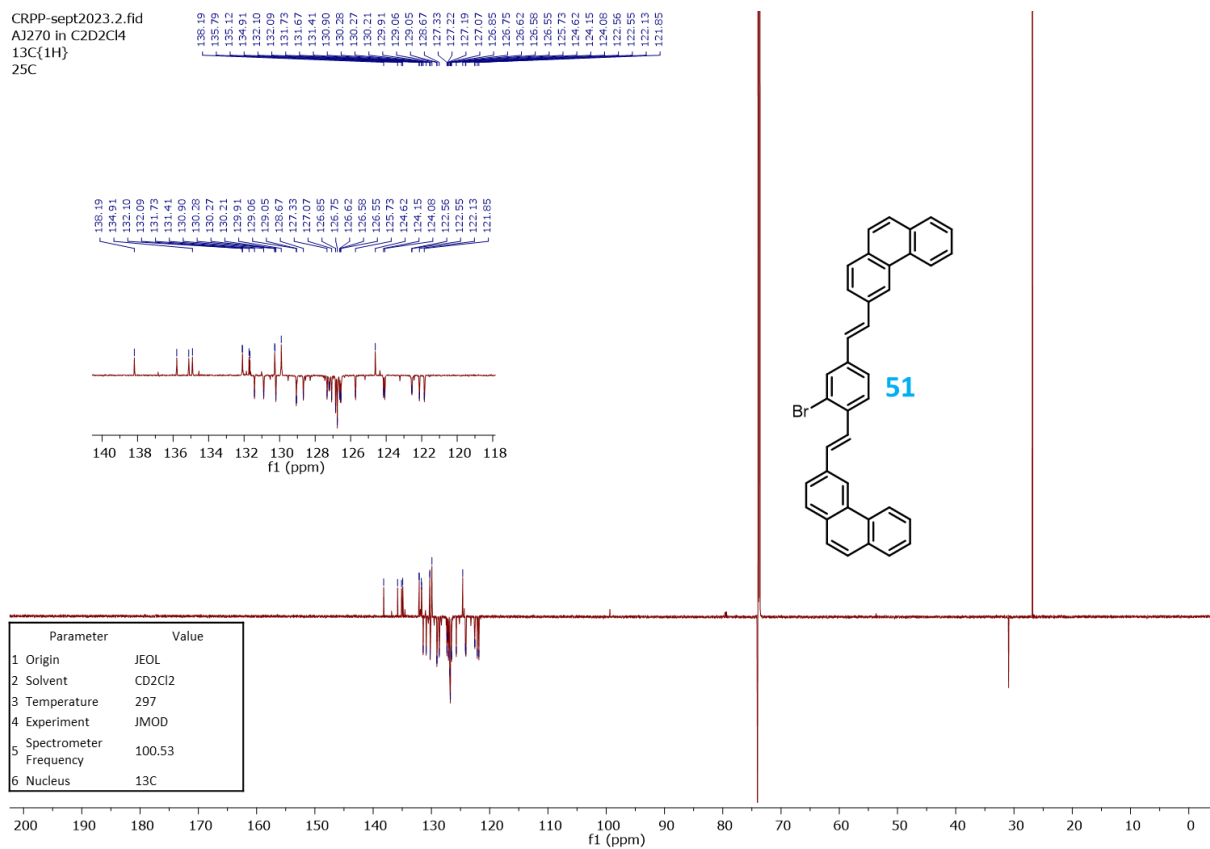

CRPP-aout2022.10  
AJ-274

| Parameter      | Value  |
|----------------|--------|
| 1 Origin       | JEOL   |
| 2 Solvent      | CD2Cl2 |
| 3 Temperature  | 297    |
| 4 Experiment   | 1D     |
| 5 Spectrometer | 399.78 |
| 6 Nucleus      | 1H     |

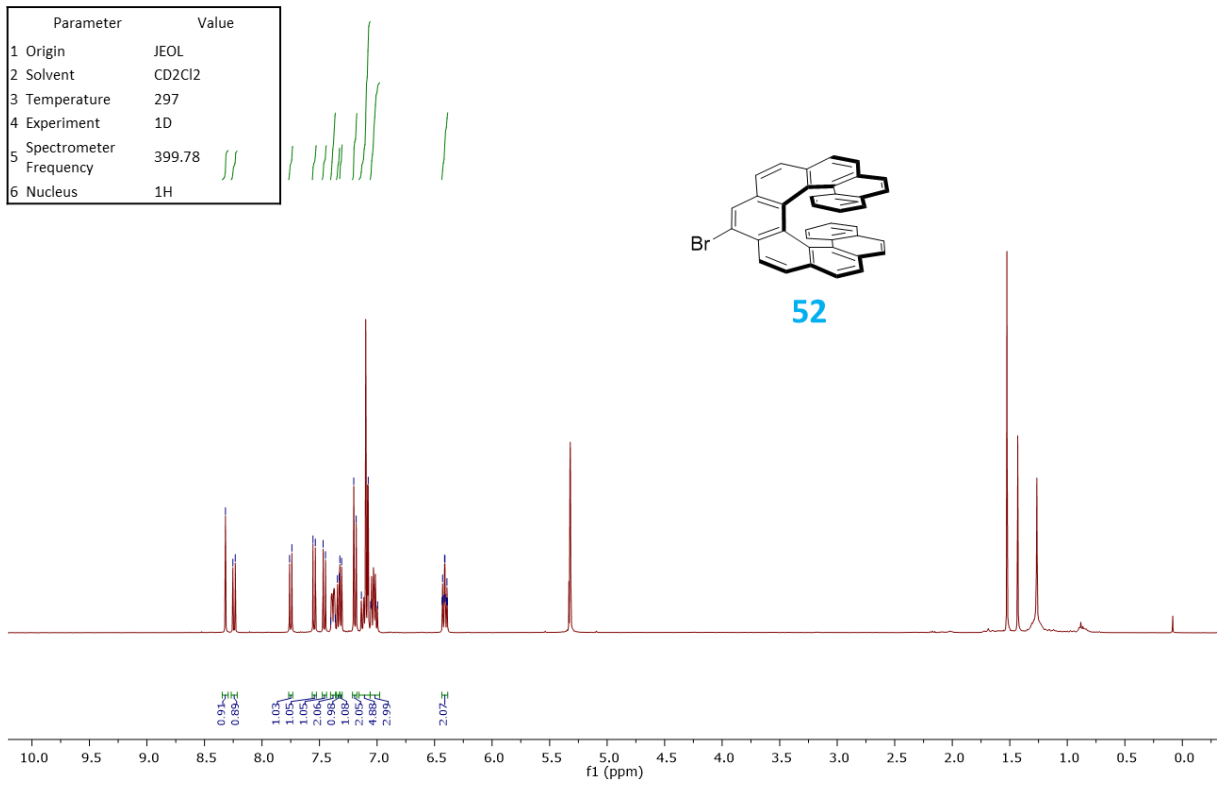

AJ274.2.fid

| Parameter      | Value               |
|----------------|---------------------|
| 1 Origin       | Bruker BioSpin GmbH |
| 2 Solvent      | C2D2Cl4             |
| 3 Temperature  | 298                 |
| 4 Experiment   | JMOD                |
| 5 Spectrometer | 150.93              |
| 6 Nucleus      | 13C                 |

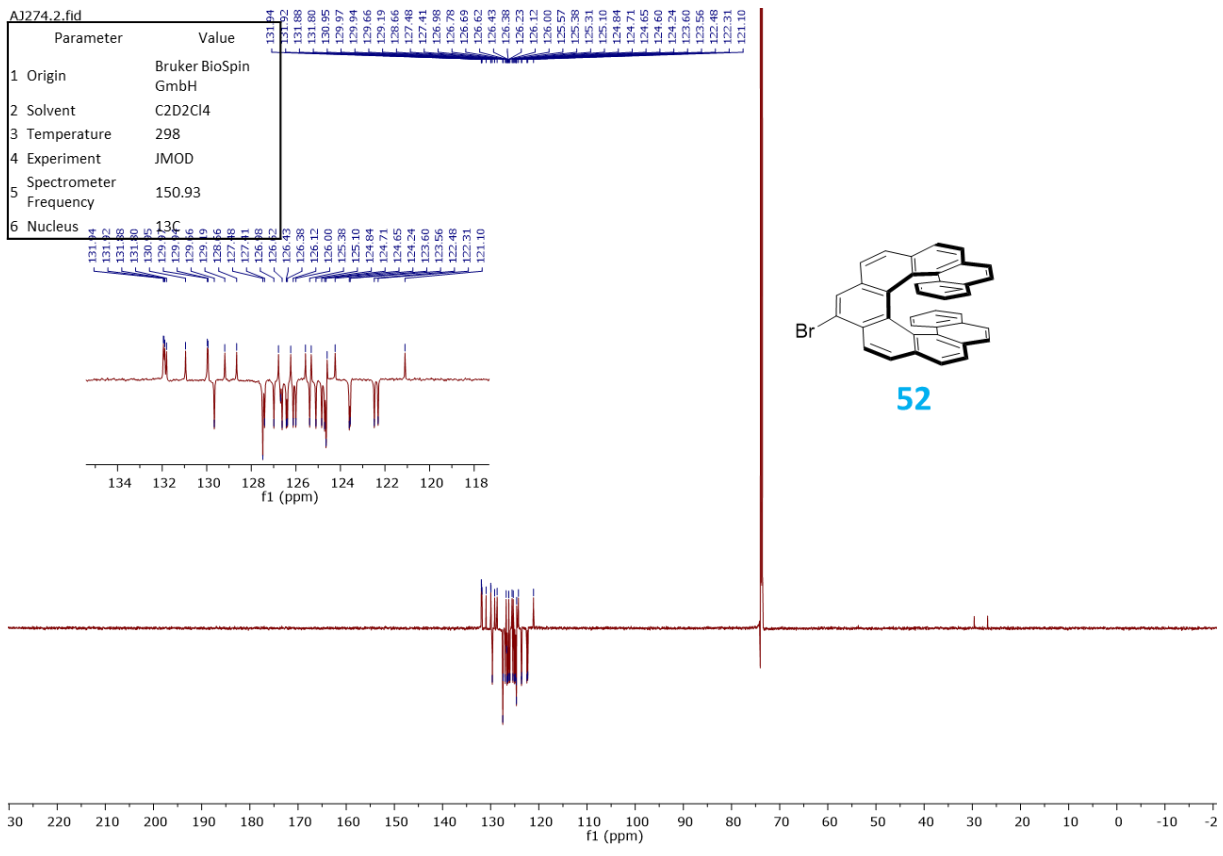

AJ279  
single\_pulse

| Parameter      | Value  |
|----------------|--------|
| 1 Origin       | JEOL   |
| 2 Solvent      | CD2Cl2 |
| 3 Temperature  | 297    |
| 4 Experiment   | 1D     |
| 5 Spectrometer | 399.78 |
| 6 Nucleus      | 1H     |

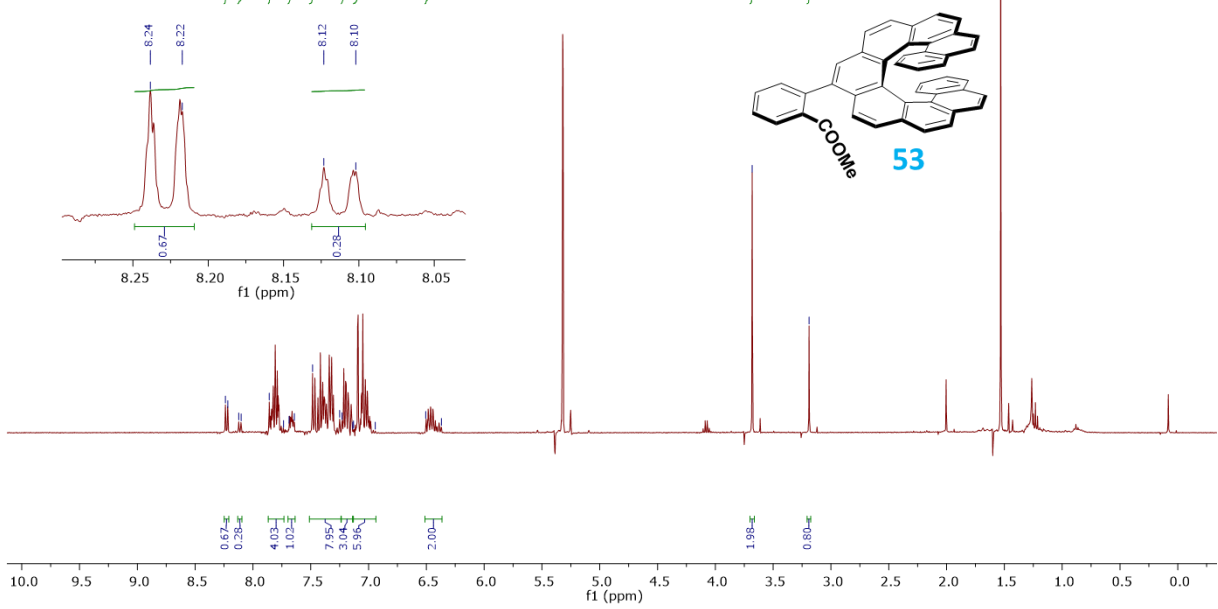

AJ282  
single\_pulse

| Parameter      | Value   |
|----------------|---------|
| 1 Origin       | JEOL    |
| 2 Solvent      | C2D2Cl4 |
| 3 Temperature  | 383     |
| 4 Experiment   | 1D      |
| 5 Spectrometer | 399.78  |
| 6 Nucleus      | 1H      |

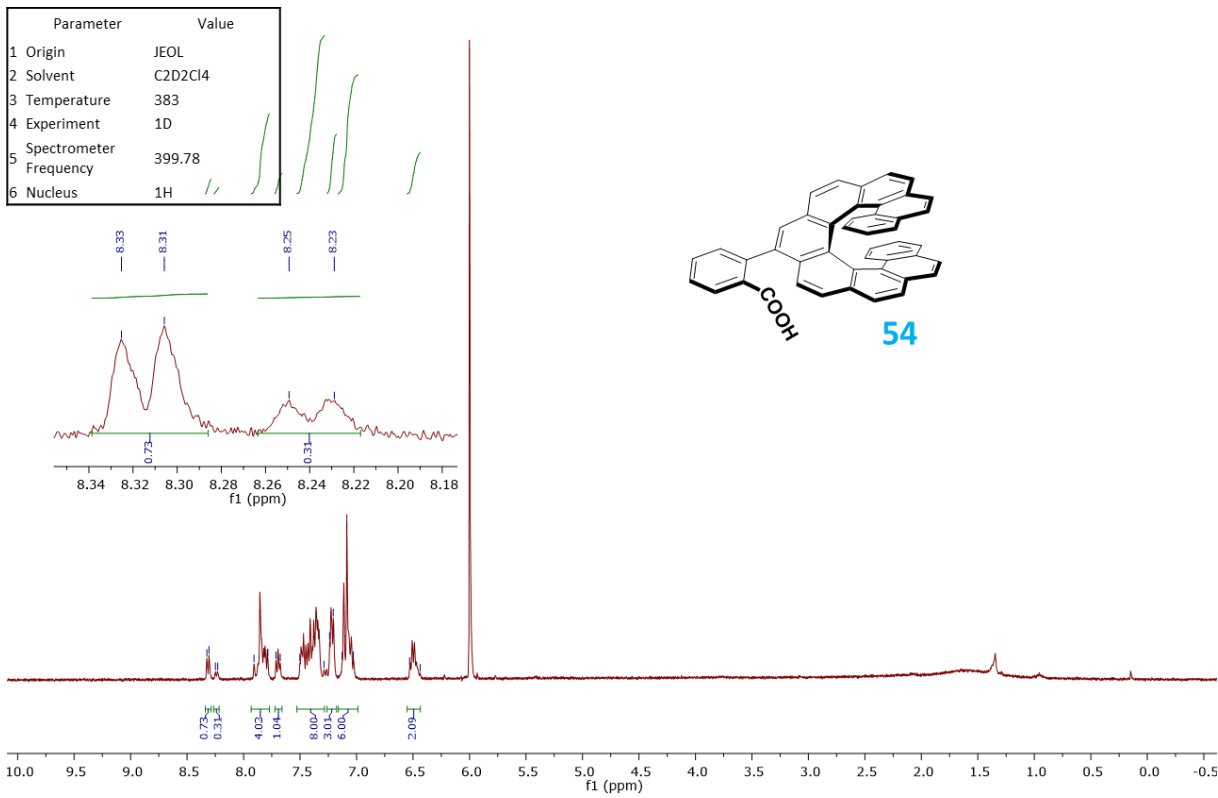

# Photophysical and chiroptical properties of 1A(F) – 8A(F)

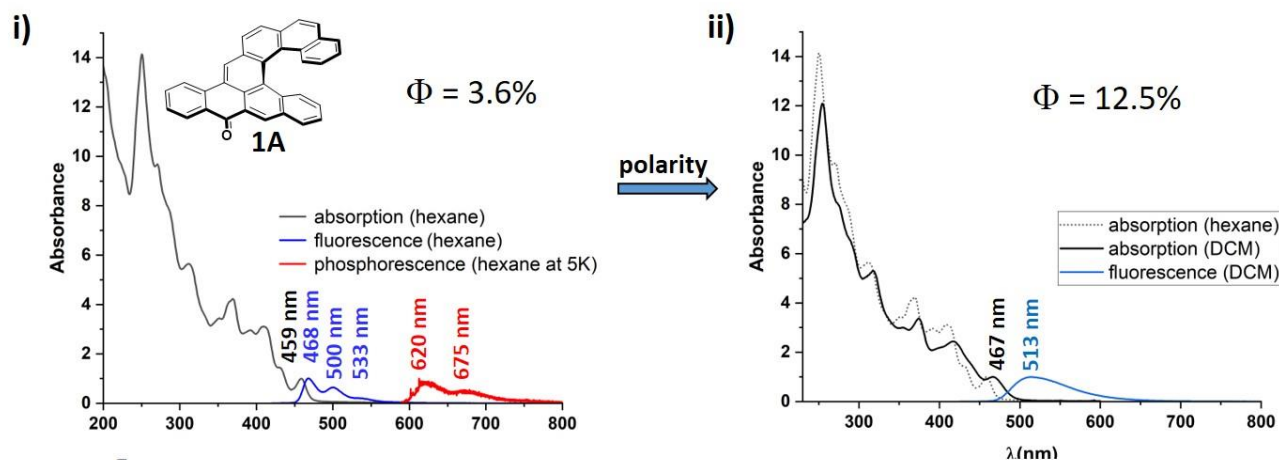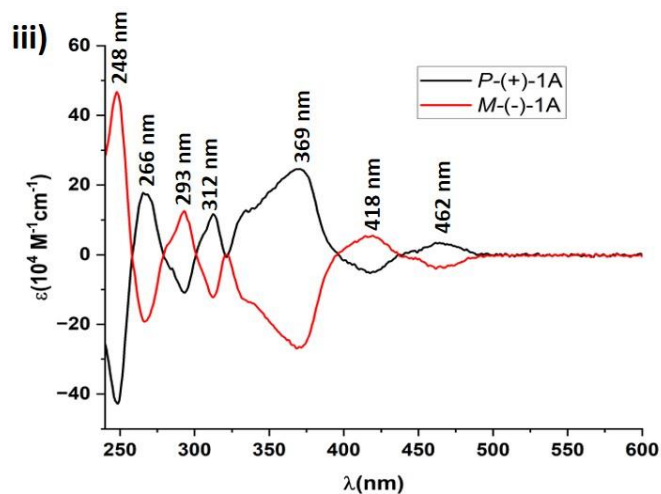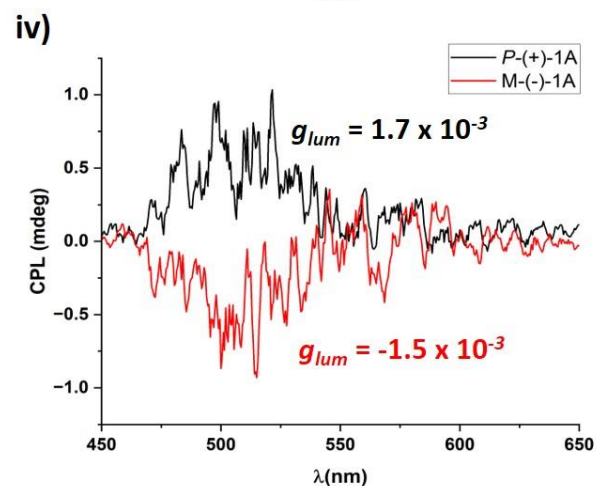

| <i>P</i> -(+)<br>Peak at<br>[nm] | $g_{abs}$<br>DCM     |
|----------------------------------|----------------------|
| 462                              | $2.2 \cdot 10^{-3}$  |
| 418                              | $-1.2 \cdot 10^{-3}$ |
| 369                              | $4.5 \cdot 10^{-3}$  |
| 312                              | $1.4 \cdot 10^{-3}$  |
| 293                              | $-1.1 \cdot 10^{-3}$ |
| 266                              | $1.2 \cdot 10^{-3}$  |
| 248                              | $-2.6 \cdot 10^{-3}$ |

**i)** UV-vis absorption and emission ( $\lambda_{exc} = 303\text{nm}$ ) in hexane **ii)** UV-vis absorption and emission ( $\lambda_{exc} = 303\text{nm}$ ) in dichloromethane (DCM) **iii)** CD spectra collected in dichloromethane (DCM) **iv)** CPL spectra and  $g_{lum}$  values collected in DCM

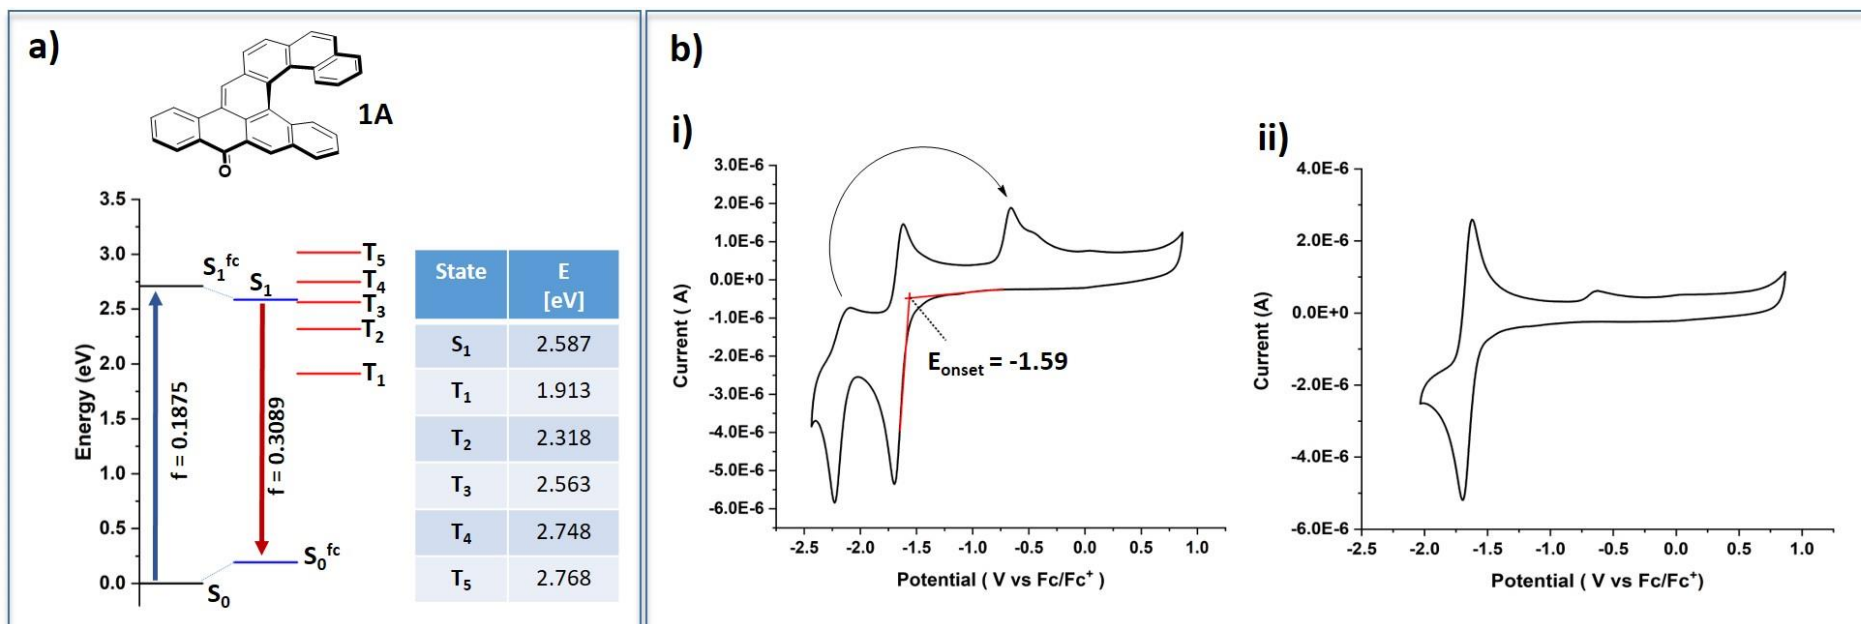

| $\lambda_{(max)}$<br>[nm]<br>DCM | $\lambda_{(em)} \lambda_{(exc)}$ <sup>a</sup><br>[nm]<br>DCM | $\Phi_{lum}$ <sup>b</sup><br>(10 <sup>-3</sup> )<br>DCM | $[\alpha]_D^{20}$<br>DCM | $\Phi_{PL}$ <sup>c</sup><br>(%)<br>hexane/DCM/ACN | $t_{fl}$<br>[ns]<br>hexane/DCM/ACN | $k_r$ <sup>d</sup><br>[10 <sup>7</sup> s <sup>-1</sup> ]<br>hexane/DCM/ACN | $k_{nr}$ <sup>e</sup><br>[10 <sup>7</sup> s <sup>-1</sup> ]<br>Hexane/DCM/ACN | $E_{HOMO}$ <sup>f</sup><br>[eV] | $E_{LUMO}$ <sup>g</sup><br>[eV] | $E_{(0,0)}$ <sup>h</sup><br>[eV]<br>DCM<br>(hexane) | $E_{(0,0)}$ <sup>i</sup><br>[eV] | $E_{T1-S0}$ <sup>j</sup><br>[eV] |
|----------------------------------|--------------------------------------------------------------|---------------------------------------------------------|--------------------------|---------------------------------------------------|------------------------------------|----------------------------------------------------------------------------|-------------------------------------------------------------------------------|---------------------------------|---------------------------------|-----------------------------------------------------|----------------------------------|----------------------------------|
| 467                              | 513(303)                                                     | +1.7<br>-1.5                                            | +2147<br>-2167           | 3.6/12.5/11.4                                     | 2.34/4.0/4.25                      | 1.5/3.1/2.7                                                                | 41.2/21.9/20.8                                                                | -5.89                           | -3.21                           | 2.55<br>(2.68)                                      | 2.59                             | 2.08                             |

a) Wavelength of excitation b) Measured in dichloromethane ( $c \approx 1 \times 10^{-5}$  M) c) Measured at room temperature ( $c \approx 1 \times 10^{-6}$  M) d) radiative rate constant calculated as  $k_r = \Phi_{PL}/t_{fl}$  e) nonradiative decay rate constant calculated as  $\Phi_{PL} = k_r/(k_r+k_{nr})$  f) Calculated as  $E_{HOMO} = E_{LUMO} - E(0,0)$  g) Calculated using the equation  $E_{LUMO} = -[E'_{red/onset} + 4.8]$  referenced against Fc/Fc<sup>+</sup>. h) Determined from the intersection of the absorption and emission curves and using equation  $E_g = hc/\lambda$  i) Calculated by TDDFT M06/6-31G(d,p) method j) determined from the phosphorescence  $\lambda_{onset}$

a) Energy-level diagram calculated by TDDFT M06/6-31G(d,p) method in ACN. b) CV voltammograms vs Fc/Fc<sup>+</sup> redox couple in acetonitrile (ACN) with a supporting electrolyte [Bu<sub>4</sub>N][PF<sub>6</sub>] (0.1M), at a scan rate 0.1 V s<sup>-1</sup> i) full CV voltammogram collected in the full range of ACN, the second irreversible reduction process lead to a product(s) with oxidation peak located at -0.6 V ii) CV voltammogram of the first reversible one-electron process.



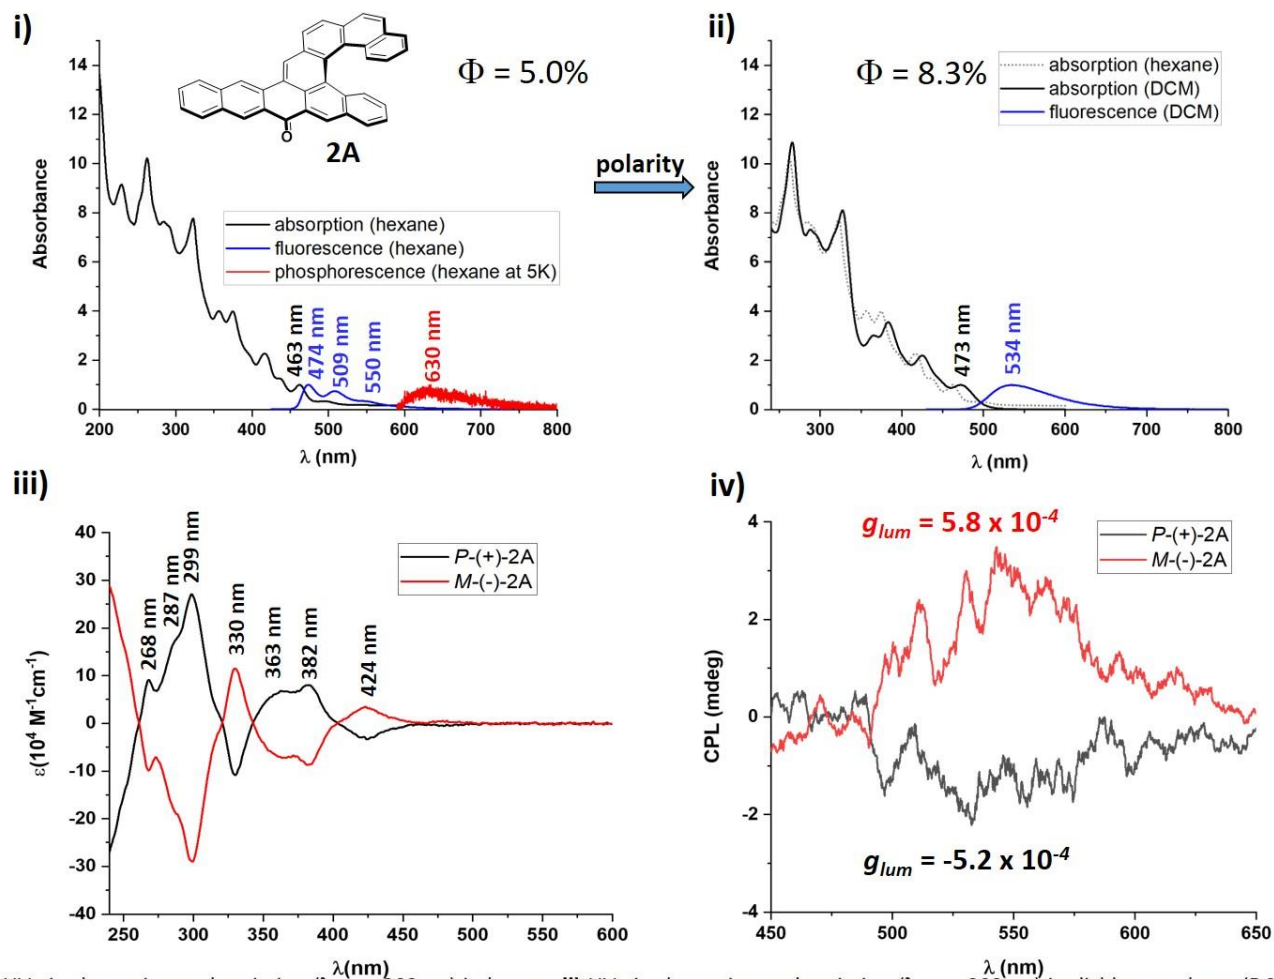

| <i>P</i> -(+)<br>Peak at<br>[nm] | $g_{\text{abs}}$     |
|----------------------------------|----------------------|
| 424                              | $-1.2 \cdot 10^{-3}$ |
| 382                              | $1.9 \cdot 10^{-3}$  |
| 363                              | $2.0 \cdot 10^{-3}$  |
| 330                              | $-1.2 \cdot 10^{-3}$ |
| 299                              | $3.2 \cdot 10^{-3}$  |
| 287                              | $2.0 \cdot 10^{-3}$  |
| 268                              | $0.7 \cdot 10^{-3}$  |

**i)** UV-vis absorption and emission ( $\lambda_{\text{exc}} = 303\text{nm}$ ) in hexane **ii)** UV-vis absorption and emission ( $\lambda_{\text{exc}} = 303\text{nm}$ ) in dichloromethane (DCM) **iii)** CD spectra collected in dichloromethane (DCM) **iv)** CPEL spectra and  $g_{\text{lum}}$  values collected in DCM

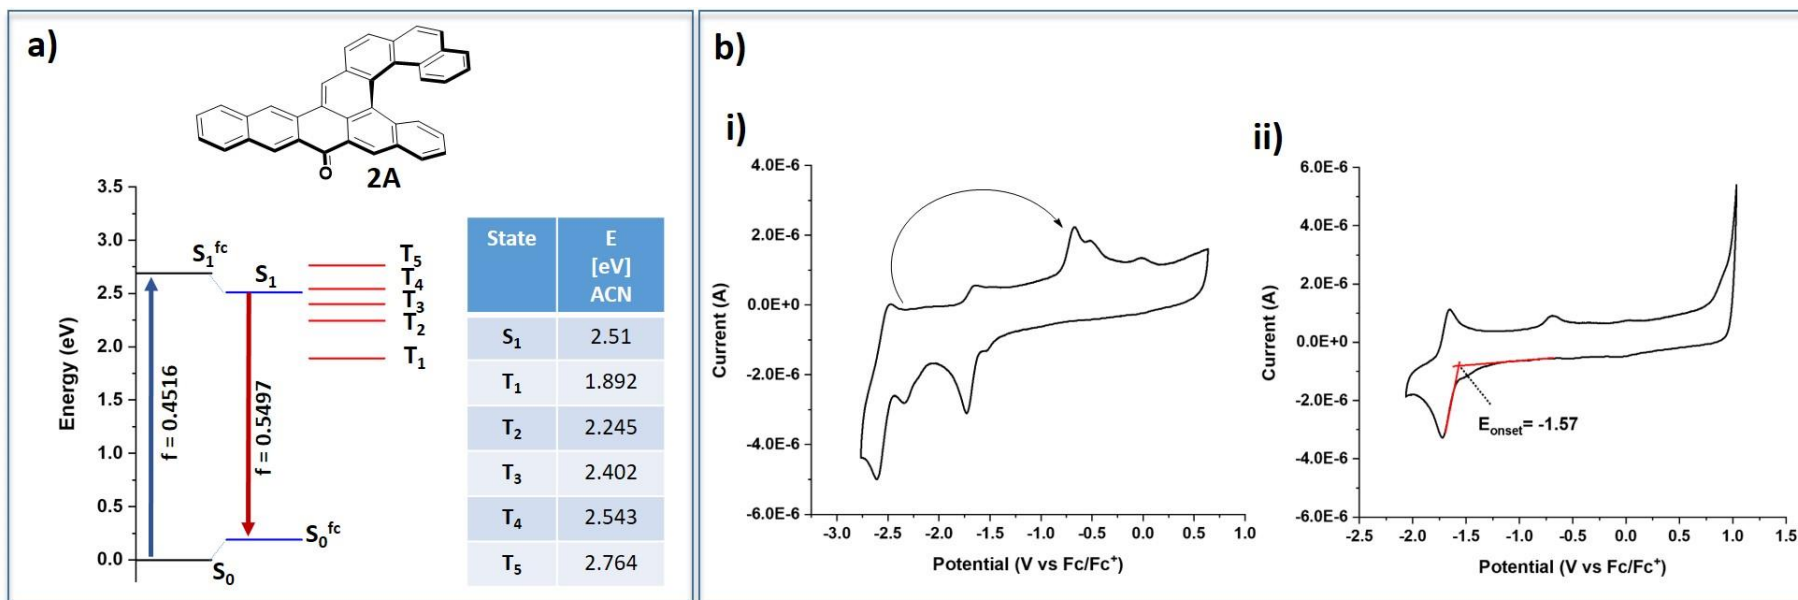

| $\lambda_{(max)}$<br>[nm] | $\lambda_{(em)}$<br>[nm] | $\lambda_{(exc)}^a$<br>[nm] | $g_{lum}^b$<br>( $10^{-3}$ ) | $[\alpha]_D^{20}$<br>DCM | $\Phi_{PL}^c$<br>(%) | $t_{fl}$<br>[ns] | $k_r^d$<br>[ $10^7 s^{-1}$ ] | $k_{nr}^e$<br>[ $10^7 s^{-1}$ ] | $E_{HOMO}^f$<br>[eV] | $E_{LUMO}^g$<br>[eV] | $E_{(0,0)}^h$<br>[eV] | $E_{(0,0)}^i$<br>[eV] | $E_{T1-50}^j$<br>[eV] |
|---------------------------|--------------------------|-----------------------------|------------------------------|--------------------------|----------------------|------------------|------------------------------|---------------------------------|----------------------|----------------------|-----------------------|-----------------------|-----------------------|
| DCM                       | DCM                      | DCM                         | DCM                          | DCM                      | hexane/DCM/ACN       | hexane/DCM/ACN   | hexane/DCM/ACN               | Hexane/DCM/ACN                  |                      |                      | DCM<br>(hexane)       |                       |                       |
| 473                       | 534(303)                 |                             | +0.58<br>-0.52               | +770<br>-748             | 5.0/8.3/7.6          | 1.93/2.71/2.5    | 2.7/3.0/3.0                  | 50.5/33.9/37                    | -5.88                | -3.23                | 2.49<br>(2.65)        | 2.51                  | 2.09                  |

**a)** Wavelength of excitation **b)** Measured in dichloromethane ( $c \approx 1 \times 10^{-5} M$ ) **c)** Measured at room temperature ( $c \approx 1 \times 10^{-6} M$ ) **d)** radiative rate constant calculated as  $k_r = \Phi_{PL}/t_{fl}$  **e)** nonradiative decay rate constant calculated as  $\Phi_{PL} = k_r/(k_r+k_{nr})$  **f)** Calculated as  $E_{HOMO} = E_{LUMO} - E(0,0)$  **g)** Calculated using the equation  $E_{LUMO} = -[E'_{red/onset} + 4.8]$  referenced against  $Fc/Fc^+$ . **h)** Determined from the intersection of the absorption and emission curves and using equation  $E_g = hc/\lambda$  **i)** Calculated by TDDFT M06/6-31G(d,p) method **j)** determined from the phosphorescence  $\lambda_{onset}$

**a)** Energy-level diagram calculated by TDDFT M06/6-31G(d,p) method in ACN. **b)** CV voltammograms vs  $Fc/Fc^+$  redox couple in acetonitrile (ACN) with a supporting electrolyte  $[Bu_4N][PF_6]$  (0.1M), at a scan rate  $0.1 V s^{-1}$  **i)** full CV voltammogram collected in the full range of ACN, the second irreversible reduction process lead to a product(s) with oxidation peak located at -0.6 V **ii)** CV voltammogram of the first reversible one-electron process.

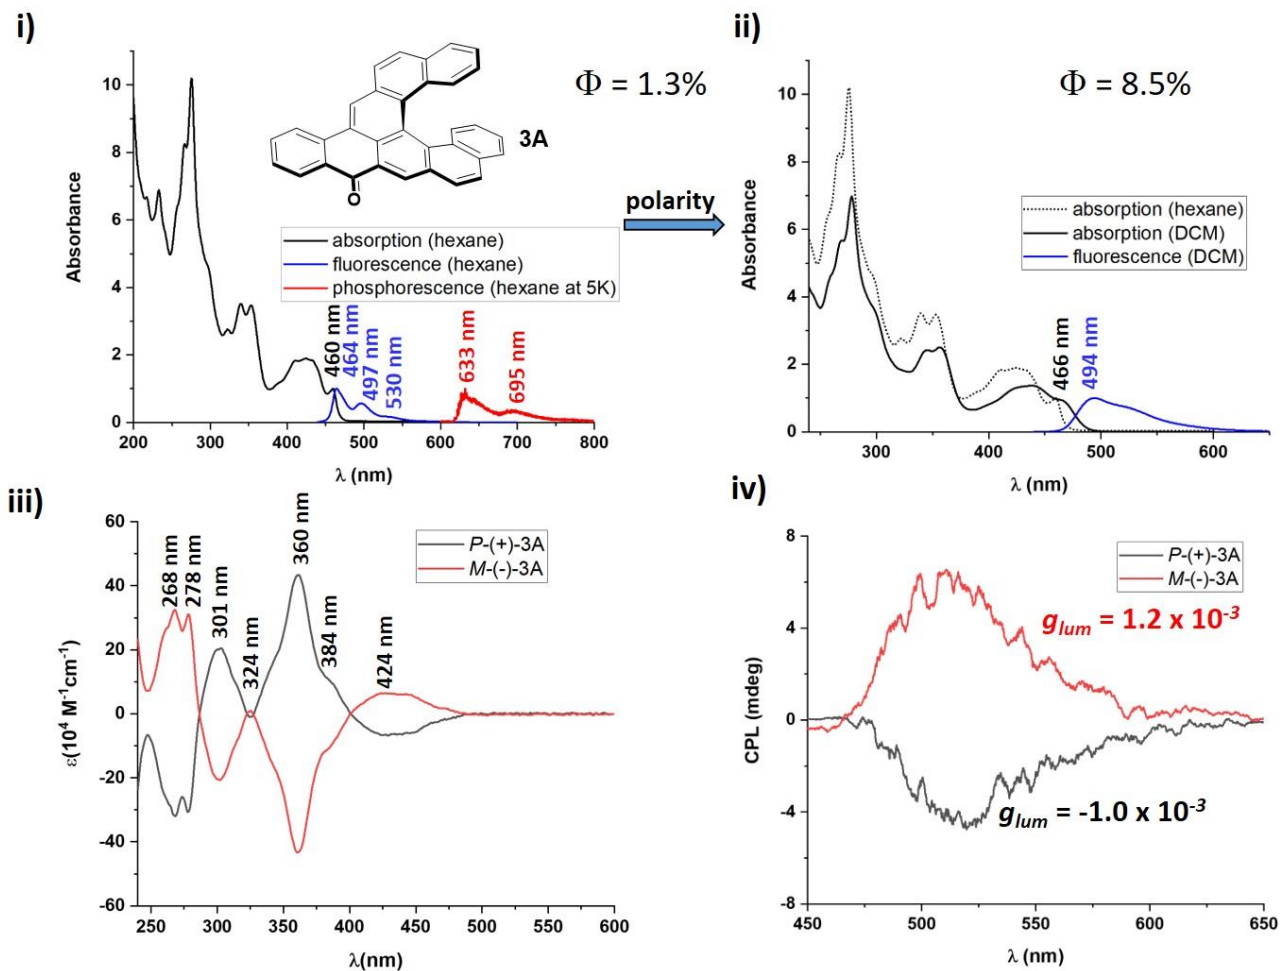

**i)** UV-vis absorption and emission ( $\lambda_{\text{exc}} = 303\text{nm}$ ) in hexane **ii)** UV-vis absorption and emission ( $\lambda_{\text{exc}} = 303\text{nm}$ ) in dichloromethane (DCM) **iii)** CD spectra collected in dichloromethane (DCM) **iv)** CPL spectra and  $g_{\text{lum}}$  values collected in DCM

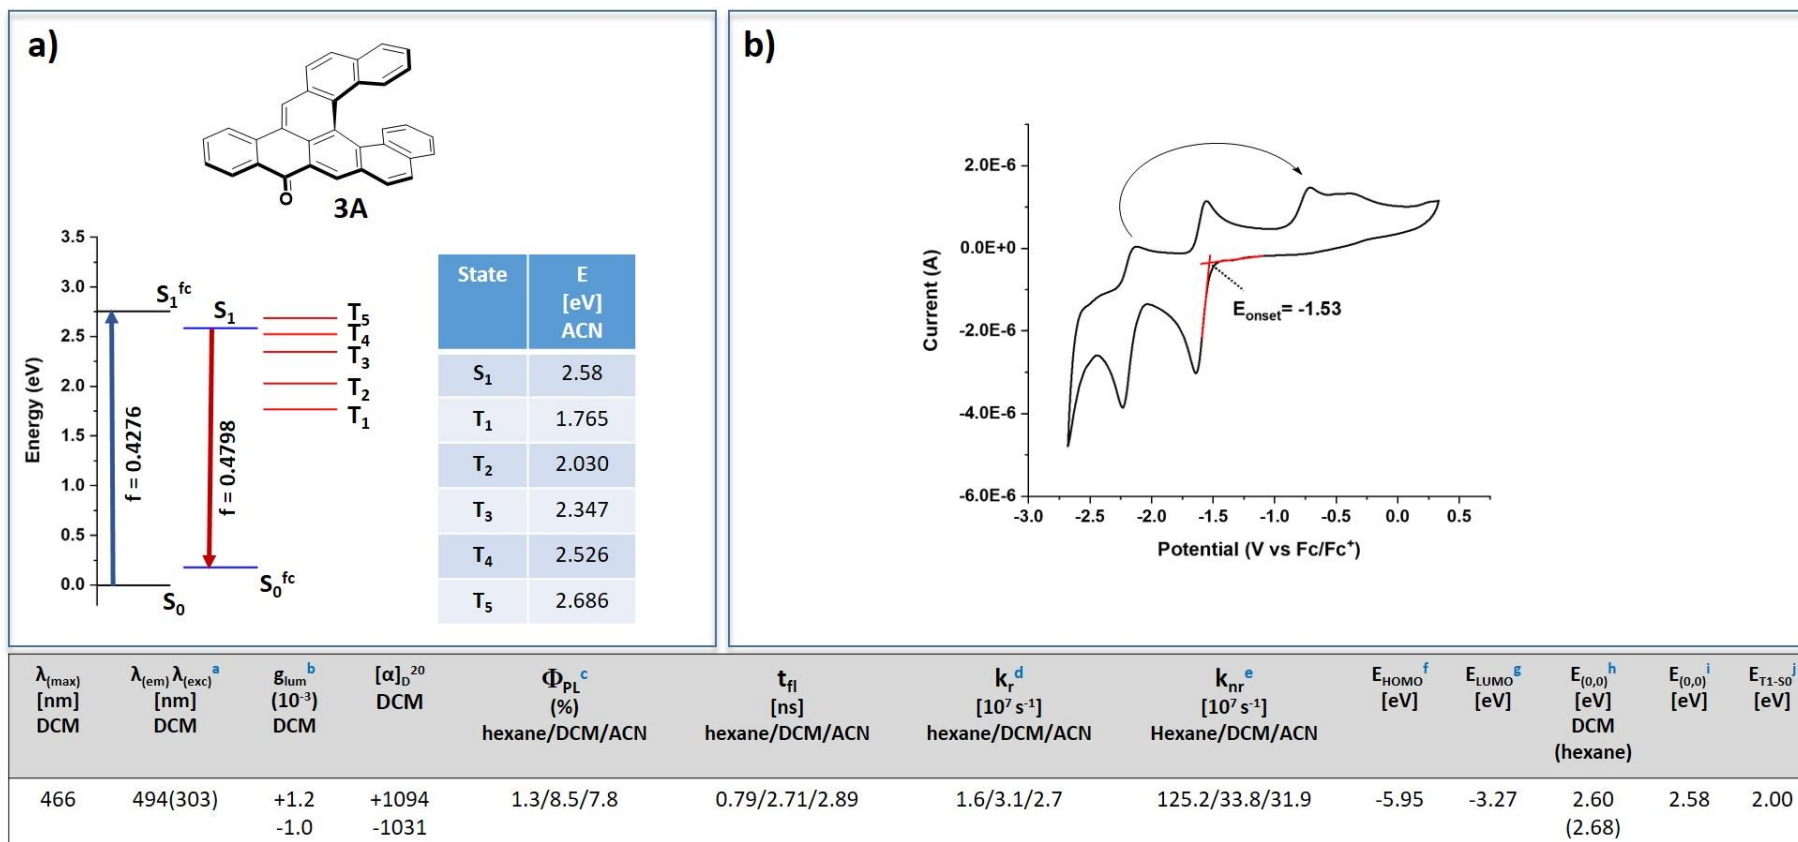

**a)** Wavelength of excitation **b)** Measured in dichloromethane ( $c \approx 1 \times 10^{-5} \text{ M}$ ) **c)** Measured at room temperature ( $c \approx 1 \times 10^{-6} \text{ M}$ ) **d)** radiative rate constant calculated as  $k_{\text{r}} = \Phi_{\text{PL}}/t_{\text{fl}}$  **e)** nonradiative decay rate constant calculated as  $\Phi_{\text{PL}} = k_{\text{r}}/(k_{\text{r}}+k_{\text{nr}})$  **f)** Calculated as  $E_{\text{HOMO}} = E_{\text{LUMO}} - E_{\text{(0,0)}}$  **g)** Calculated using the equation  $E_{\text{LUMO}} = -[E'_{\text{red/onset}} + 4.8]$  referenced against  $\text{Fc}/\text{Fc}^+$ . **h)** Determined from the intersection of the absorption and emission curves and using equation  $E_{\text{g}} = hc/\lambda$  **i)** Calculated by TDDFT M06/6-31G(d,p) method **j)** determined from the phosphorescence  $\lambda_{\text{onset}}$

**a)** Energy-level diagram calculated by TDDFT M06/6-31G(d,p) method in ACN. **b)** CV voltammogram vs  $\text{Fc}/\text{Fc}^+$  redox couple in acetonitrile (ACN) with a supporting electrolyte  $[\text{Bu}_4\text{N}][\text{PF}_6]$  (0.1M), at a scan rate  $0.1 \text{ V s}^{-1}$ , the second irreversible reduction process lead to a product(s) with oxidation peak located at -0.6 V.

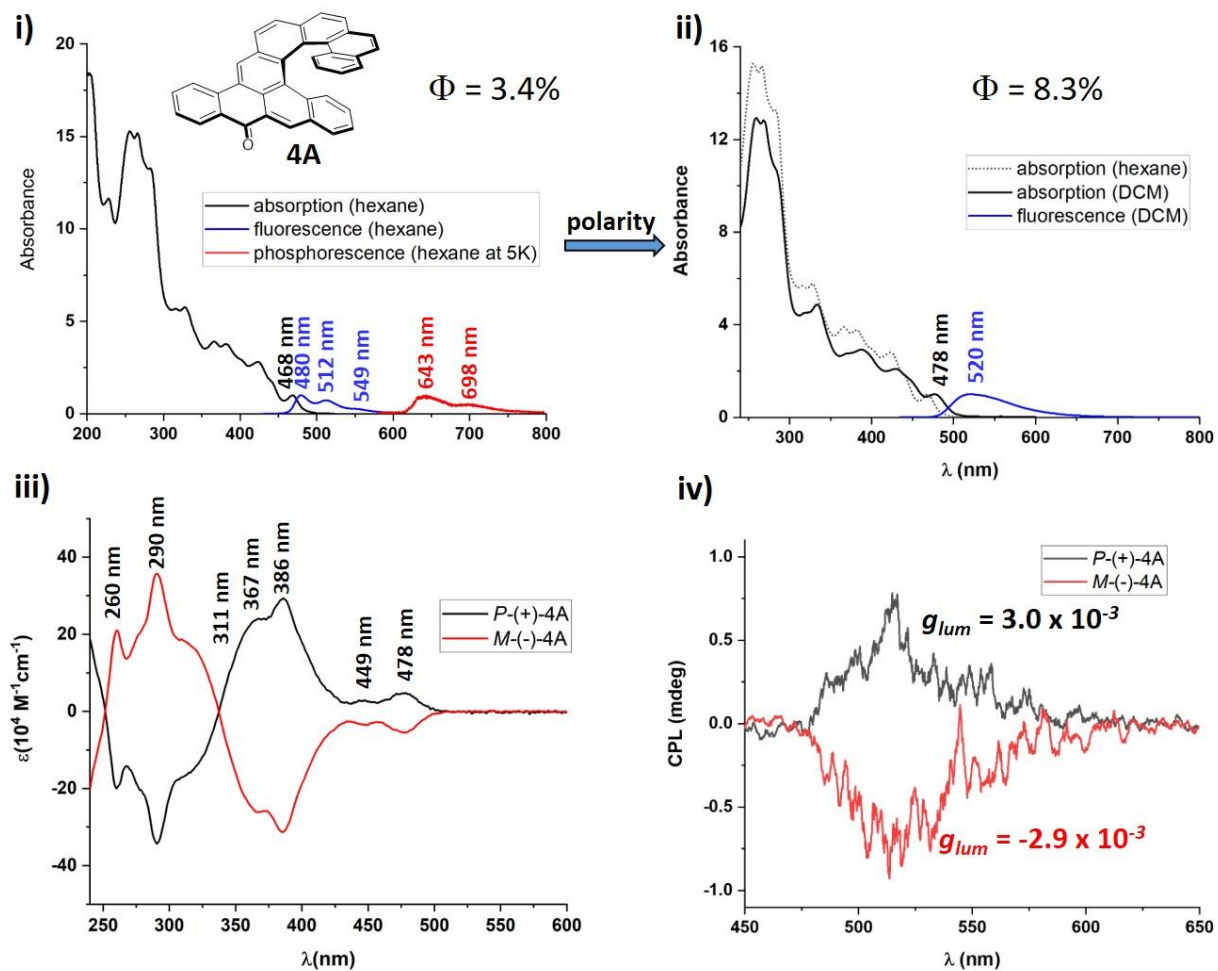

| <i>P</i> -(+)<br>Peak at<br>[nm] | $\epsilon_{abs}$      |
|----------------------------------|-----------------------|
| 478                              | $3.6 \times 10^{-3}$  |
| 449                              | $1.3 \times 10^{-3}$  |
| 386                              | $7.5 \times 10^{-3}$  |
| 367                              | $6.7 \times 10^{-3}$  |
| 311                              | $-3.0 \times 10^{-3}$ |
| 290                              | $-2.7 \times 10^{-3}$ |
| 260                              | $-1.3 \times 10^{-3}$ |

**i)** UV-vis absorption and emission ( $\lambda_{exc} = 336 \text{ nm}$ ) in hexane **ii)** UV-vis absorption and emission ( $\lambda_{exc} = 336 \text{ nm}$ ) in dichloromethane (DCM) **iii)** CD spectra collected in dichloromethane (DCM) **iv)** CPL spectra and  $g_{lum}$  values collected in DCM



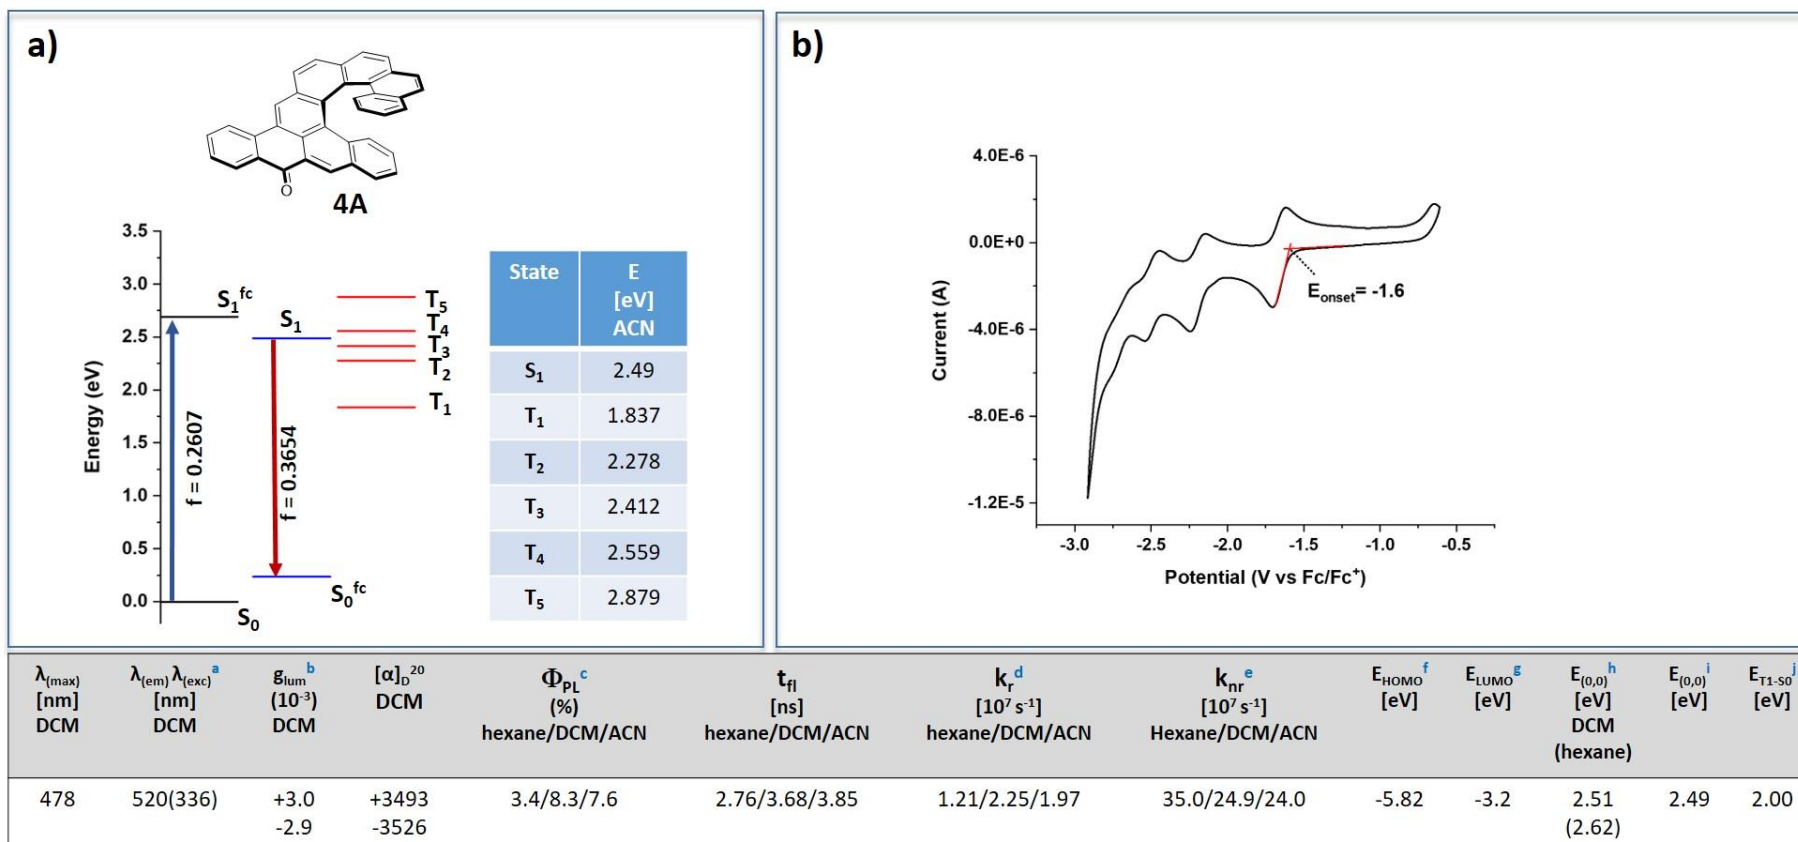

a) Wavelength of excitation b) Measured in dichloromethane ( $c \approx 1 \times 10^{-5} M$ ) c) Measured at room temperature ( $c \approx 1 \times 10^{-6} M$ ) d) radiative rate constant calculated as  $k_r = \Phi_{PL}/t_{fl}$  e) nonradiative decay rate constant calculated as  $\Phi_{PL} = k_r/(k_r+k_{nr})$  f) Calculated as  $E_{HOMO} = E_{LUMO} - E(0,0)$  g) Calculated using the equation  $E_{LUMO} = -[E'_{red/onset} + 4.8]$  referenced against  $Fc/Fc^+$ . h) Determined from the intersection of the absorption and emission  $\lambda_{onset}$  curves and using equation  $E_g = hc/\lambda$  i) Calculated by TDDFT M06/6-31G(d,p) method j) determined from the phosphorescence  $\lambda_{onset}$

a) Energy-level diagram calculated by TDDFT M06/6-31G(d,p) method in ACN. b) CV voltammogram vs  $Fc/Fc^+$  redox couple in acetonitrile (ACN) with a supporting electrolyte  $[Bu_4N][PF_6]$  (0.1M), at a scan rate  $0.1 V s^{-1}$

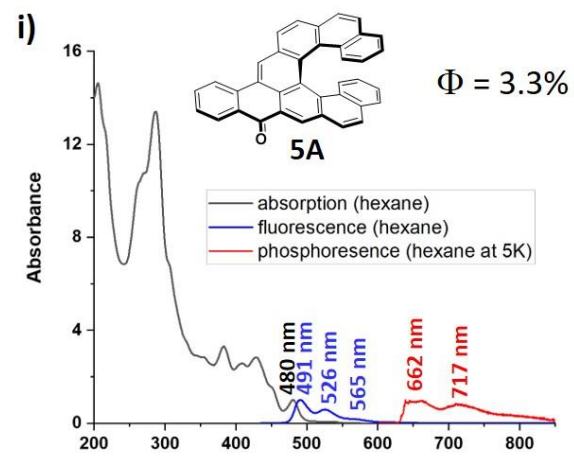

polarity →

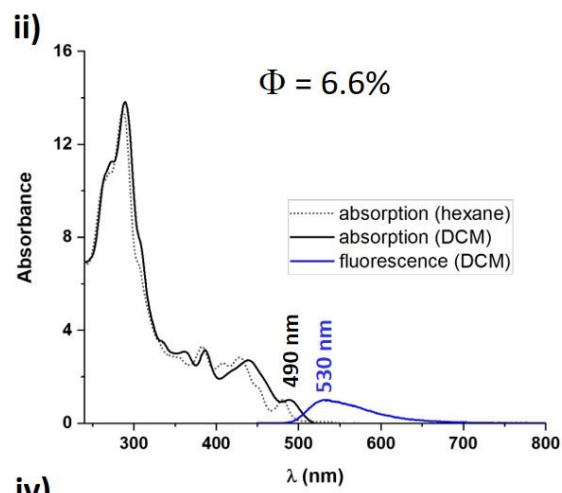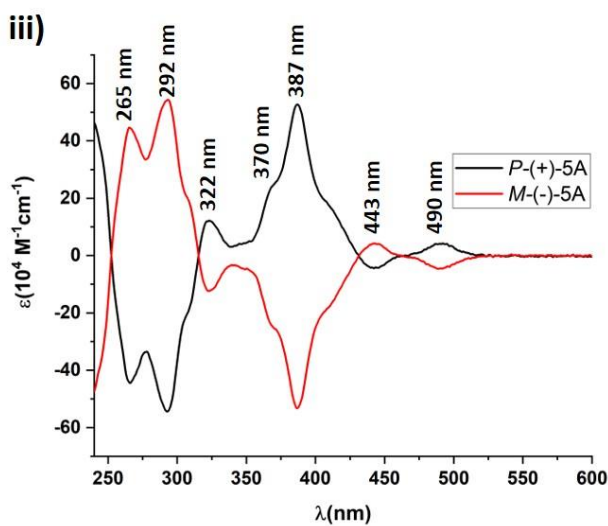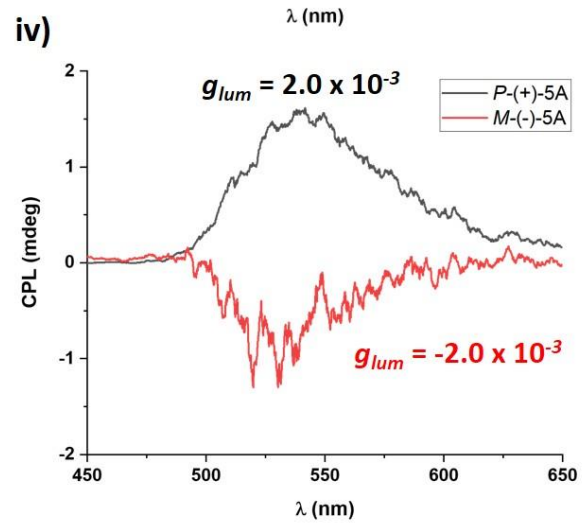

| <i>P</i> -(+) Peak at [nm] | $g_{abs}$              |
|----------------------------|------------------------|
| 490                        | $-2.8 \times 10^{-3}$  |
| 443                        | $1.0 \times 10^{-3}$   |
| 387                        | $-10.0 \times 10^{-3}$ |
| 370                        | $-5.5 \times 10^{-3}$  |
| 322                        | $-1.6 \times 10^{-3}$  |
| 292                        | $2.5 \times 10^{-3}$   |
| 265                        | $2.6 \times 10^{-3}$   |

**i)** UV-vis absorption and emission ( $\lambda_{exc} = 303\text{nm}$ ) in hexane **ii)** UV-vis absorption and emission ( $\lambda_{exc} = 303\text{nm}$ ) in dichloromethane (DCM) **iii)** CD spectra collected in dichloromethane (DCM) **iv)** CPL spectra and  $g_{lum}$  values collected in DCM

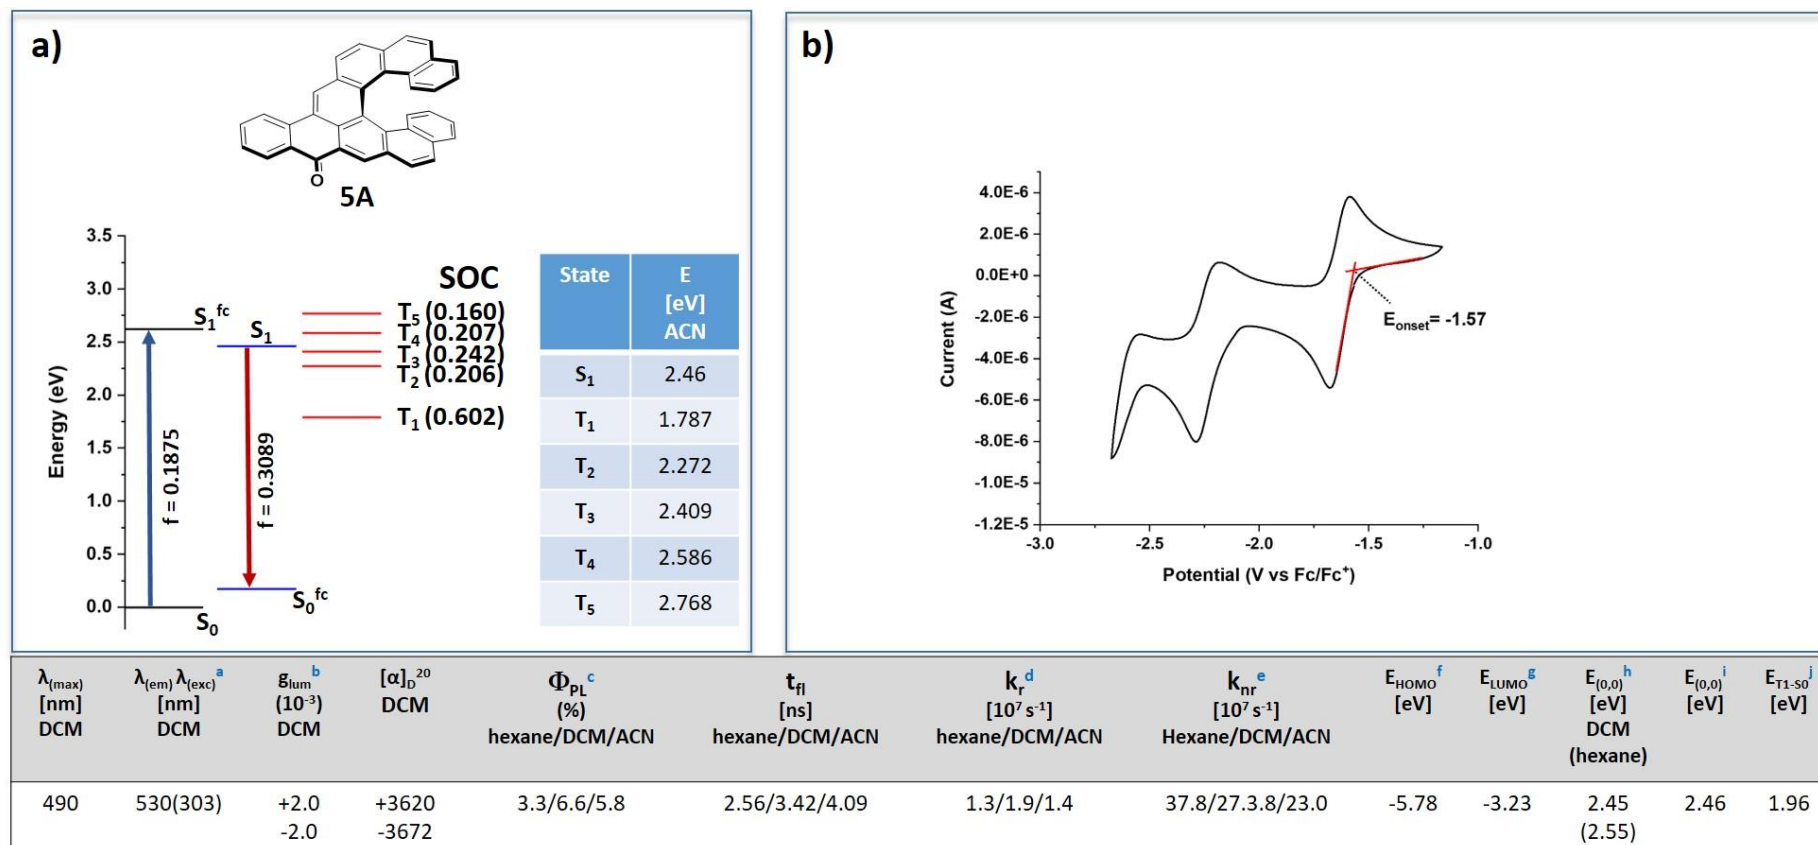

a) Wavelength of excitation b) Measured in dichloromethane ( $c \approx 1 \times 10^{-5} \text{ M}$ ) c) Measured at room temperature ( $c \approx 1 \times 10^{-6} \text{ M}$ ) d) radiative rate constant calculated as  $k_{\text{r}} = \Phi_{\text{PL}}/\tau_{\text{fl}}$  e) nonradiative decay rate constant calculated as  $\Phi_{\text{PL}} = k_{\text{r}}/(k_{\text{r}}+k_{\text{nr}})$  f) Calculated as  $E_{\text{HOMO}} = E_{\text{LUMO}} - E(0,0)$  g) Calculated using the equation  $E_{\text{LUMO}} = -[E'_{\text{red/onset}} + 4.8]$  referenced against  $\text{Fc}/\text{Fc}^+$ . h) Determined from the intersection of the absorption and emission curves and using equation  $E_{\text{g}} = hc/\lambda$  i) Calculated by TDDFT M06/6-31G(d,p) method j) determined from the phosphorescence  $\lambda_{\text{onset}}$

a) Energy-level diagram calculated by TDDFT M06/6-31G(d,p) method in ACN. b) CV voltammogram vs  $\text{Fc}/\text{Fc}^+$  redox couple in acetonitrile (ACN) with a supporting electrolyte  $[\text{Bu}_4\text{N}][\text{PF}_6]$  (0.1M), at a scan rate  $0.1 \text{ V s}^{-1}$



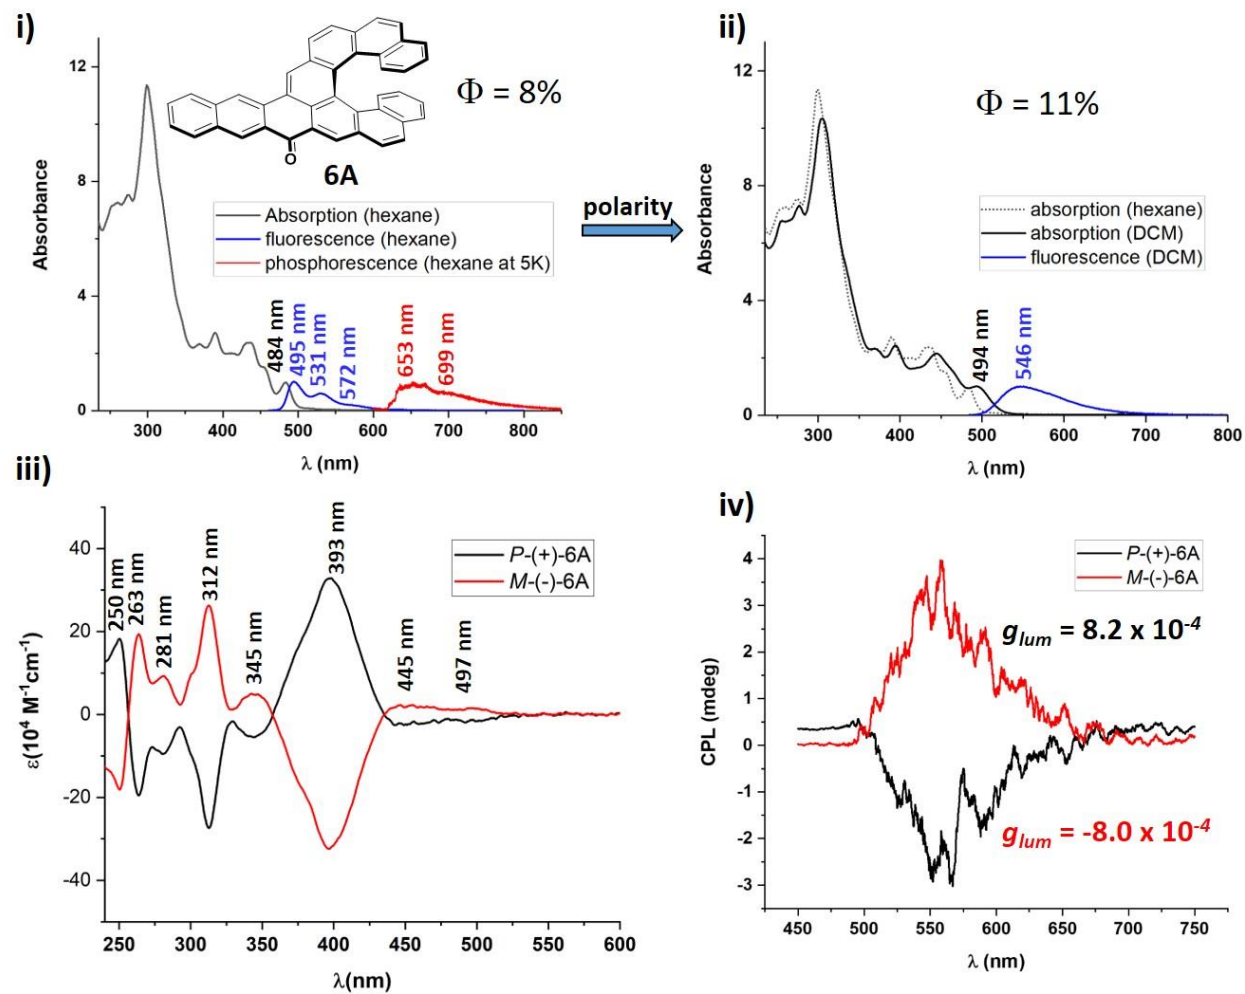

**i)** UV-vis absorption and emission ( $\lambda_{exc} = 303\text{nm}$ ) in hexane **ii)** UV-vis absorption and emission ( $\lambda_{exc} = 303\text{nm}$ ) in dichloromethane (DCM) **iii)** CD spectra collected in dichloromethane (DCM) **iv)** CPEL spectra and glum values collected in DCM

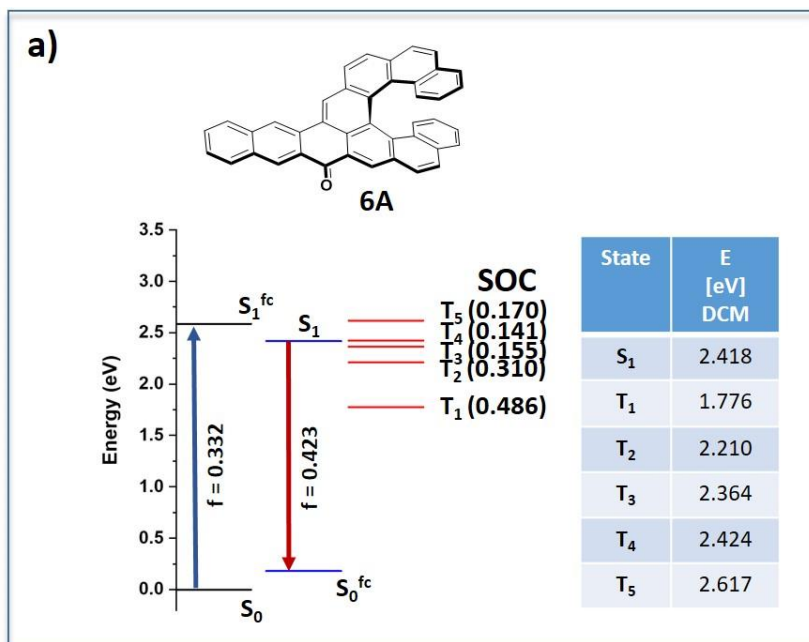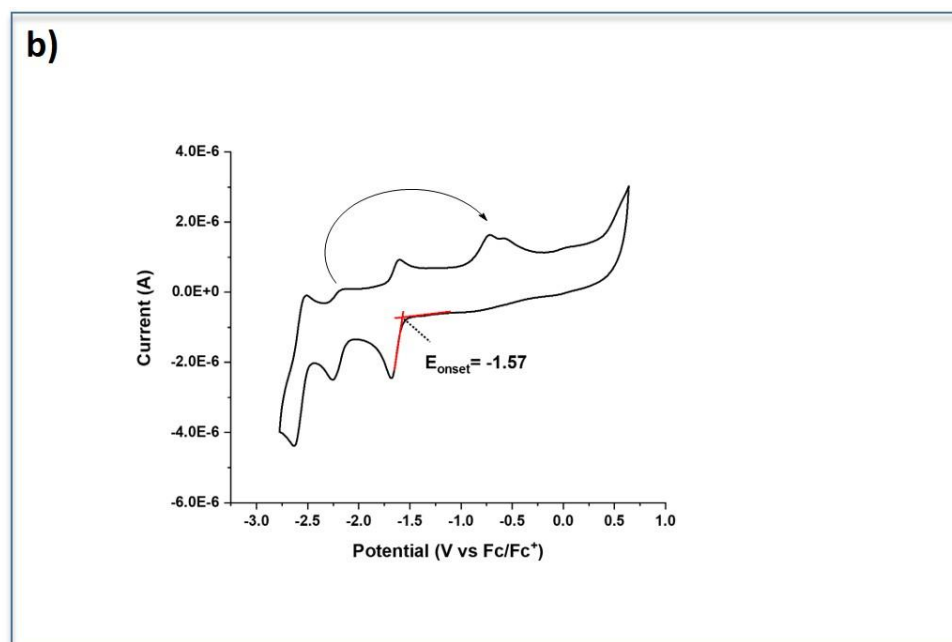

| $\lambda_{(max)}$<br>[nm]<br>DCM | $\lambda_{(em)} \lambda_{(exc)}$ <sup>a</sup><br>[nm]<br>DCM | $\xi_{lum}$ <sup>b</sup><br>(10 <sup>-3</sup> )<br>DCM | $[\alpha]_D^{20}$<br>DCM | $\Phi_{PL}$ <sup>c</sup><br>(%)<br>hexane/DCM/ACN | $t_{fl}$<br>[ns]<br>hexane/DCM/ACN | $k_r$ <sup>d</sup><br>[10 <sup>7</sup> s <sup>-1</sup> ]<br>hexane/DCM/ACN | $k_{nr}$ <sup>e</sup><br>[10 <sup>7</sup> s <sup>-1</sup> ]<br>Hexane/DCM/ACN | $E_{HOMO}$ <sup>f</sup><br>[eV] | $E_{LUMO}$ <sup>g</sup><br>[eV] | $E_{(0,0)}$ <sup>h</sup><br>[eV]<br>DCM<br>(hexane) | $E_{(0,0)}$ <sup>i</sup><br>[eV] | $E_{T1-S0}$ <sup>j</sup><br>[eV] |
|----------------------------------|--------------------------------------------------------------|--------------------------------------------------------|--------------------------|---------------------------------------------------|------------------------------------|----------------------------------------------------------------------------|-------------------------------------------------------------------------------|---------------------------------|---------------------------------|-----------------------------------------------------|----------------------------------|----------------------------------|
| 494                              | 546(303)                                                     | +0.82<br>-0.80                                         | +2014<br>-1945           | 7.9/11.2/10.8                                     | 2.71/2.45/2.95                     | 2.9/4.6/3.7                                                                | 33.9/36.2/30.2                                                                | -5.78                           | -3.23                           | 2.41<br>(2.53)                                      | 2.42                             | 2.00                             |

**a)** Wavelength of excitation **b)** Measured in dichloromethane ( $c \approx 1 \times 10^{-5}$  M) **c)** Measured at room temperature ( $c \approx 1 \times 10^{-6}$  M) **d)** radiative rate constant calculated as  $k_r = \Phi_{PL}/t_{fl}$  **e)** nonradiative decay rate constant calculated as  $\Phi_{PL} = k_r/(k_r+k_{nr})$  **f)** Calculated as  $E_{HOMO} = E_{LUMO} - E(0,0)$  **g)** Calculated using the equation  $E_{LUMO} = -[E'_{red/onset} + 4.8]$  referenced against Fc/Fc<sup>+</sup>. **h)** Determined from the intersection of the absorption and emission curves and using equation  $E_g = hc/\lambda$  **i)** Calculated by TDDFT M06/6-31G(d,p) method **j)** determined from the phosphorescence  $\lambda_{onset}$

**a)** Energy-level diagram calculated by TDDFT M06/6-31G(d,p) method in ACN. **b)** CV voltammogram vs Fc/Fc<sup>+</sup> redox couple in acetonitrile (ACN) with a supporting electrolyte [Bu<sub>4</sub>N][PF<sub>6</sub>] (0.1M), at a scan rate 0.1 V s<sup>-1</sup>, the second irreversible reduction process lead to a product(s) with oxidation peak located at -0.6 V.

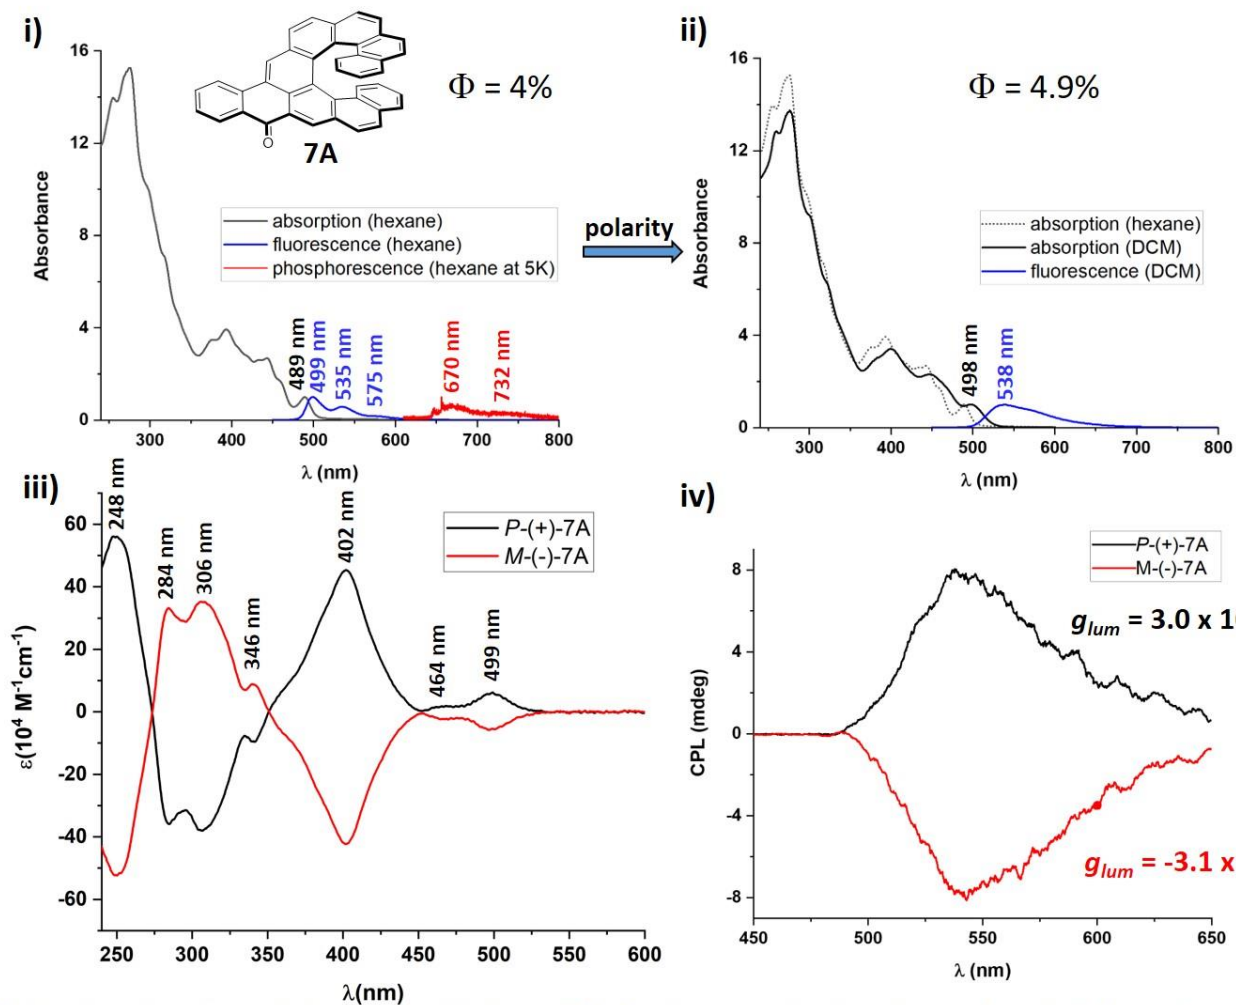

| <i>P</i> -(+) | $g_{\text{abs}}$     |
|---------------|----------------------|
| Peak at [nm]  |                      |
| 499           | $7.0 \cdot 10^{-3}$  |
| 464           | $1.0 \cdot 10^{-3}$  |
| 402           | $11.0 \cdot 10^{-3}$ |
| 346           | $-1.5 \cdot 10^{-3}$ |
| 306           | $-3.5 \cdot 10^{-3}$ |
| 284           | $-2.3 \cdot 10^{-3}$ |
| 248           | $4.0 \cdot 10^{-3}$  |

i) UV-vis absorption and emission ( $\lambda_{\text{exc}} = 303\text{nm}$ ) in hexane ii) UV-vis absorption and emission ( $\lambda_{\text{exc}} = 303\text{nm}$ ) in dichloromethane (DCM) iii) CD spectra collected in dichloromethane (DCM) iv) CPL spectra and  $g_{\text{lum}}$  values collected in DCM

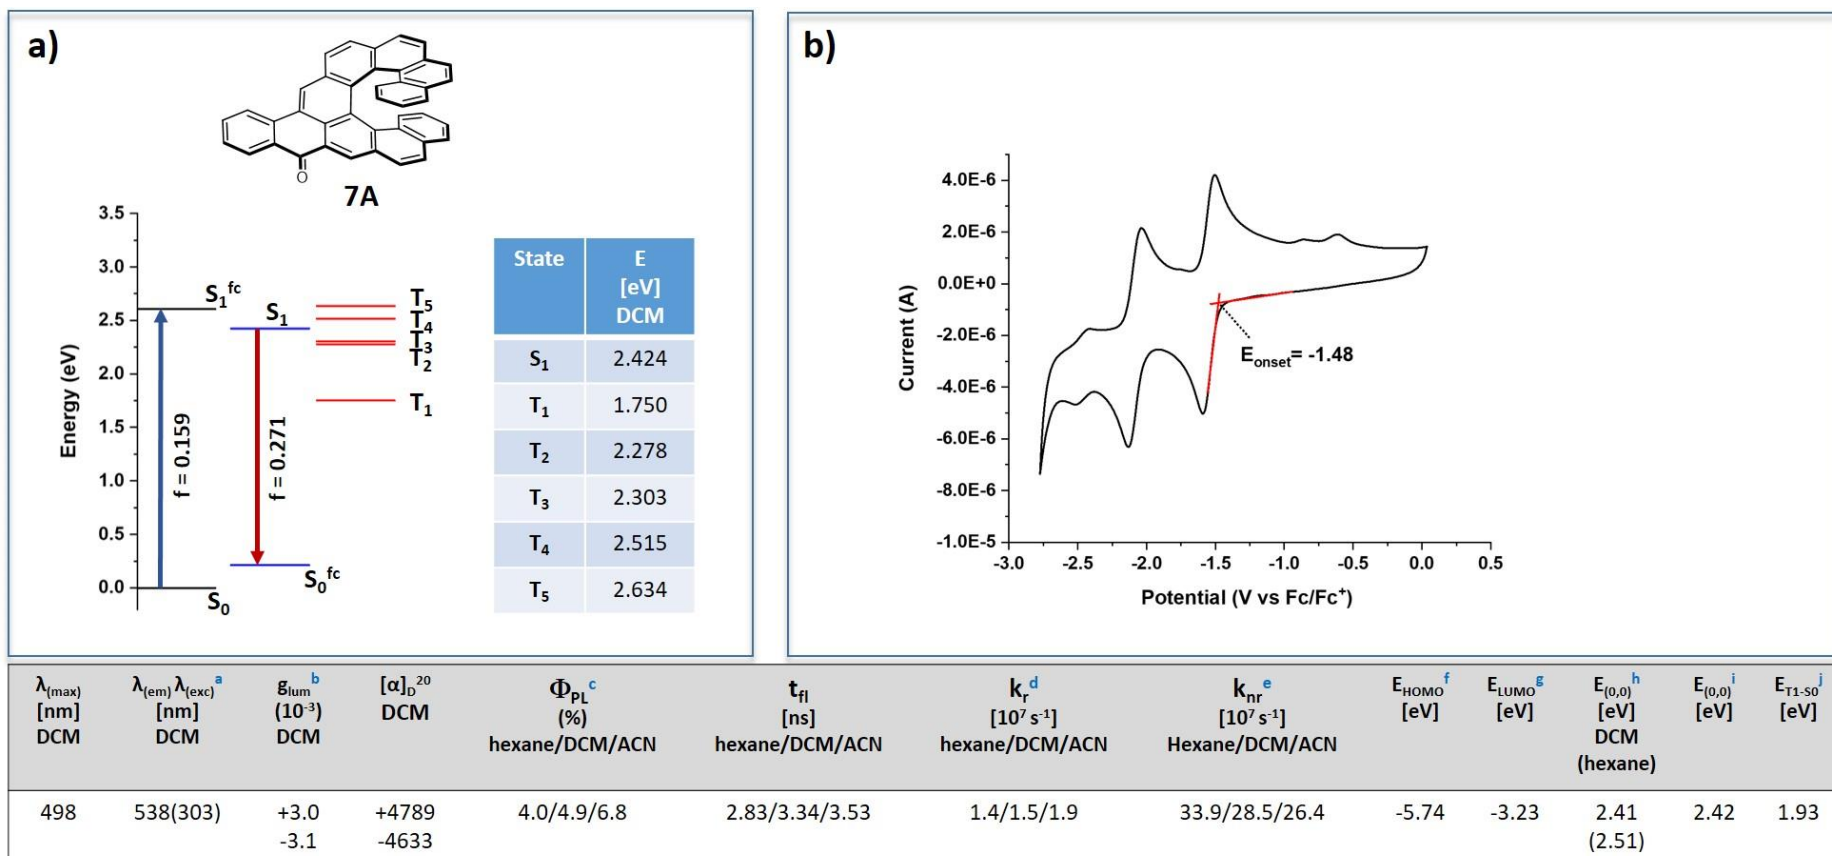

a) Wavelength of excitation b) Measured in dichloromethane ( $c \approx 1 \times 10^{-5}$  M) c) Measured at room temperature ( $c \approx 1 \times 10^{-6}$  M) d) radiative rate constant calculated as  $k_r = \Phi_{PL}/t_{fl}$  e) nonradiative decay rate constant calculated as  $\Phi_{PL} = k_r/(k_r+k_{nr})$  f) Calculated as  $E_{HOMO} = E_{LUMO} - E(0,0)$  g) Calculated using the equation  $E_{LUMO} = -[E'_{red/onset} + 4.8]$  referenced against  $Fc/Fc^+$ . h) Determined from the intersection of the absorption and emission curves and using equation  $E_g = hc/\lambda$  i) Calculated by TDDFT M06/6-31G(d,p) method j) determined from the phosphorescence  $\lambda_{onset}$

a) Energy-level diagram calculated by TDDFT M06/6-31G(d,p) method in ACN. b) CV voltammogram vs  $Fc/Fc^+$  redox couple in acetonitrile (ACN) with a supporting electrolyte  $[Bu_4N][PF_6]$  (0.1M), at a scan rate  $0.1 \text{ V s}^{-1}$



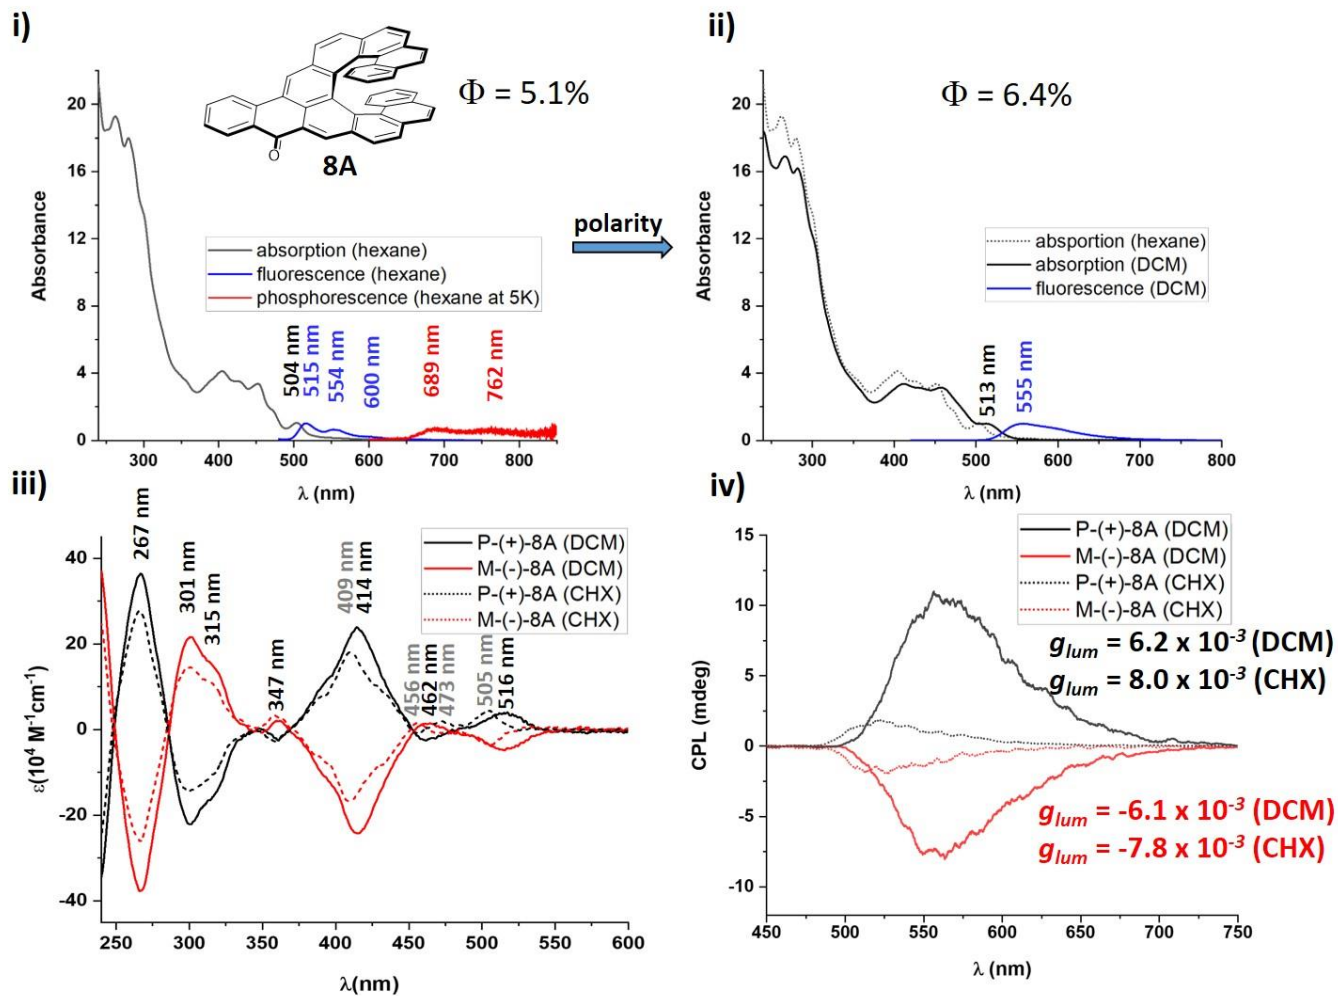

| <i>P</i> -(+) Peak at [nm] DCM (CHX) | $g_{abs}$ DCM (CHX)                            |
|--------------------------------------|------------------------------------------------|
| 516 (505)                            | $8.6 \cdot 10^{-3}$ ( $9.3 \cdot 10^{-3}$ )    |
| 462 (456)                            | $-0.7 \cdot 10^{-3}$ ( $-0.75 \cdot 10^{-3}$ ) |
| 414 (409)                            | $13.6 \cdot 10^{-3}$ ( $11.7 \cdot 10^{-3}$ )  |
| 347 (347)                            | $-0.4 \cdot 10^{-3}$ ( $0.2 \cdot 10^{-3}$ )   |
| 315 (315)                            | $3.7 \cdot 10^{-3}$ ( $3.6 \cdot 10^{-3}$ )    |
| 301 (301)                            | $3.2 \cdot 10^{-3}$ ( $3.0 \cdot 10^{-3}$ )    |
| 267 (267)                            | $-4.0 \cdot 10^{-3}$ ( $-3.7 \cdot 10^{-3}$ )  |

**i)** UV-vis absorption and emission ( $\lambda_{(exc)} = 303\text{nm}$ ) in hexane **ii)** UV-vis absorption and emission ( $\lambda_{(exc)} = 303\text{nm}$ ) in dichloromethane (DCM) **iii)** CD spectra collected in dichloromethane (DCM) **iv)** CPeL spectra and  $g_{lum}$  values collected in DCM and cyclohexane (CHX)

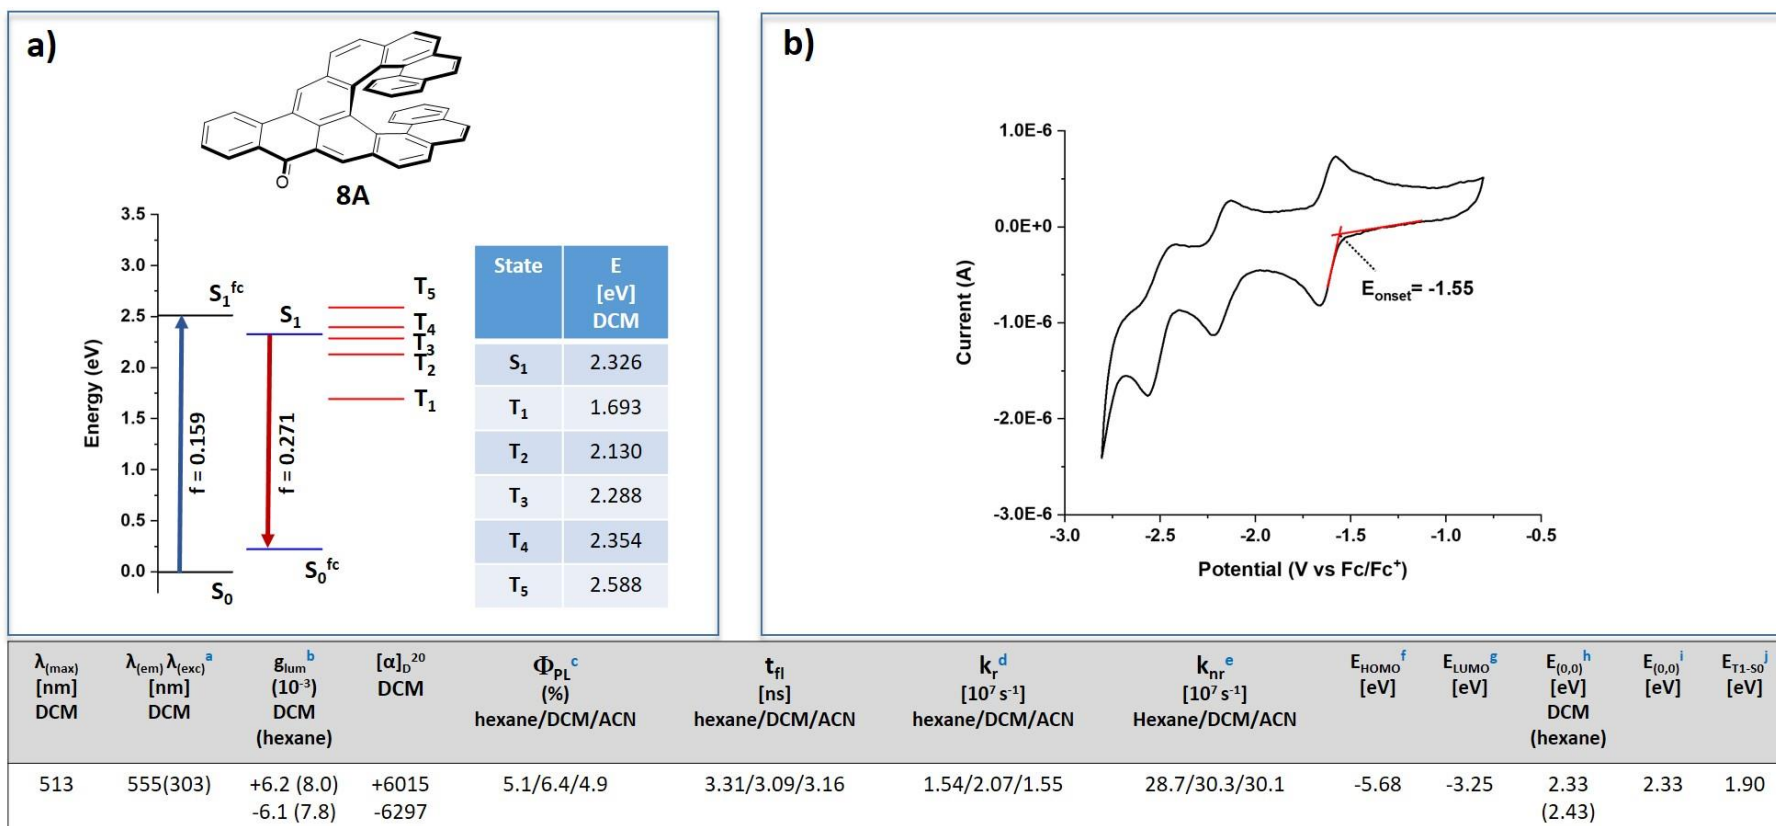

a) Wavelength of excitation b) Measured in dichloromethane ( $c \approx 1 \times 10^{-5}$  M) c) Measured at room temperature ( $c \approx 1 \times 10^{-6}$  M) d) radiative rate constant calculated as  $k_r = \Phi_{PL}/t_{fl}$  e) nonradiative decay rate constant calculated as  $\Phi_{PL} = k_r/(k_r+k_{nr})$  f) Calculated as  $E_{HOMO} = E_{LUMO} - E(0,0)$  g) Calculated using the equation  $E_{LUMO} = -[E'_{red/onset} + 4.8]$  referenced against Fc/Fc<sup>+</sup>. h) Determined from the intersection of the absorption and emission curves and using equation  $E_g = hc/\lambda$  i) Calculated by TDDFT M06/6-31G(d,p) method j) determined from the phosphorescence  $\lambda_{onset}$

a) Energy-level diagram calculated by TDDFT M06/6-31G(d,p) method in ACN. b) CV voltammogram vs Fc/Fc<sup>+</sup> redox couple in acetonitrile (ACN) with a supporting electrolyte [Bu<sub>4</sub>N][PF<sub>6</sub>] (0.1M), at a scan rate 0.1 V s<sup>-1</sup>

**Table S1: photophysical data**

| aceno[6]helicenones |                                            |                                                             | aceno[7]helicenones                                        |                          |                                               | aceno[8]helicenone                        | aceno[9]helicenone                                     |                                                                  |                             |                             |                                          |                       |                              |
|---------------------|--------------------------------------------|-------------------------------------------------------------|------------------------------------------------------------|--------------------------|-----------------------------------------------|-------------------------------------------|--------------------------------------------------------|------------------------------------------------------------------|-----------------------------|-----------------------------|------------------------------------------|-----------------------|------------------------------|
| Helicene            | $\lambda_{\text{onset}}$<br>[nm]<br>hexane | $\lambda_{\text{em}} \lambda_{\text{exc}}^a$<br>[nm]<br>DCM | $\beta_{\text{lum}}^b$<br>( $10^{-3}$ )<br>DCM<br>(hexane) | $[\alpha]_D^{20}$<br>DCM | $\Phi_{\text{PL}}^c$<br>(%)<br>hexane/DCM/ACN | $t_{\text{fl}}$<br>[ns]<br>hexane/DCM/ACN | $k_r^d$<br>[ $10^7 \text{ s}^{-1}$ ]<br>hexane/DCM/ACN | $k_{\text{nr}}^e$<br>[ $10^7 \text{ s}^{-1}$ ]<br>Hexane/DCM/ACN | $E_{\text{HOMO}}^f$<br>[eV] | $E_{\text{LUMO}}^g$<br>[eV] | $E_{(0,0)}^h$<br>[eV]<br>DCM<br>(hexane) | $E_{(0,0)}^i$<br>[eV] | $E_{\text{T1-S0}}^j$<br>[eV] |
| <b>1A</b>           | 469                                        | 513(303)                                                    | +1.7<br>-1.5                                               | +2147<br>-2167           | 3.6/12.5/11.4                                 | 2.34/4.0/4.25                             | 1.5/3.1/2.7                                            | 41.2/21.9/20.8                                                   | -5.89                       | -3.21                       | 2.55<br>(2.68)                           | 2.59                  | 2.08                         |
| <b>2A</b>           | 475                                        | 534(303)                                                    | +0.58<br>-0.52                                             | +770<br>-748             | 5.0/8.3/7.6                                   | 1.93/2.71/2.5                             | 2.7/3.0/3.0                                            | 50.5/33.9/37                                                     | -5.88                       | -3.23                       | 2.49<br>(2.65)                           | 2.51                  | 2.09                         |
| <b>3A</b>           | 467                                        | 494(303)                                                    | +1.2<br>-1.0                                               | +1094<br>-1031           | 1.3/8.5/7.8                                   | 0.79/2.71/2.89                            | 1.6/3.1/2.7                                            | 125.2/33.8/31.9                                                  | -5.95                       | -3.27                       | 2.60<br>(2.68)                           | 2.58                  | 2.00                         |
| <b>4A</b>           | 481                                        | 520(336)                                                    | +3.0<br>-2.9                                               | +3493<br>-3526           | 3.4/8.3/7.6                                   | 2.76/3.68/3.85                            | 1.21/2.25/1.97                                         | 35.0/24.9/24.0                                                   | -5.82                       | -3.2                        | 2.51<br>(2.62)                           | 2.49                  | 2.00                         |
| <b>5A</b>           | 493                                        | 530(303)                                                    | +2.0<br>-2.0                                               | +3620<br>-3672           | 3.3/6.6/5.8                                   | 2.56/3.42/4.09                            | 1.3/1.9/1.4                                            | 37.8/27.3/23.0                                                   | -5.78                       | -3.23                       | 2.45<br>(2.55)                           | 2.46                  | 1.96                         |
| <b>6A</b>           | 497                                        | 546(303)                                                    | +0.82<br>-0.80                                             | +2014<br>-1945           | 7.9/11.2/10.8                                 | 2.71/2.45/2.95                            | 2.9/4.6/3.7                                            | 33.9/36.2/30.2                                                   | -5.78                       | -3.23                       | 2.41<br>(2.53)                           | 2.42                  | 2.00                         |
| <b>7A</b>           | 501                                        | 538(303)                                                    | +3.0<br>-3.1                                               | +4789<br>-4633           | 4.0/4.9/6.8                                   | 2.83/3.34/3.53                            | 1.4/1.5/1.9                                            | 33.9/28.5/26.4                                                   | -5.74                       | -3.23                       | 2.41<br>(2.51)                           | 2.42                  | 1.93                         |
| <b>8A</b>           | 517                                        | 555(303)                                                    | +6.2 (-7.8)<br>-6.1 (8.0)                                  | +6015<br>-6297           | 5.1/6.4/4.9                                   | 3.31/3.09/3.16                            | 1.54/2.07/1.55                                         | 28.7/30.3/30.1                                                   | -5.68                       | -3.25                       | 2.33<br>(2.43)                           | 2.33                  | 1.90                         |

a) Wavelength of excitation b) Measured in dichloromethane ( $c \approx 1 \times 10^{-5} \text{ M}$ ) c) Measured at room temperature ( $c \approx 1 \times 10^{-6} \text{ M}$ ) d) radiative rate constant calculated as  $k_r = \Phi_{\text{pl}}/t_{\text{fl}}$  e) nonradiative decay rate constant calculated as  $\Phi_{\text{PL}} = k_r/(k_r+k_{\text{nr}})$  f) Calculated as  $E_{\text{HOMO}} = E_{\text{LUMO}} - E(0,0)$  g) Calculated using the equation  $E_{\text{LUMO}} = -[E'_{\text{red/onset}} + 4.8]$  referenced against Fc/Fc<sup>+</sup>. h) Determined from the intersection of the absorption and emission curves and using equation  $E_g = hc/\lambda$  i) Calculated by TDDFT M06/6-31G(d,p) method j) determined from the phosphorescence  $\lambda_{\text{onset}}$

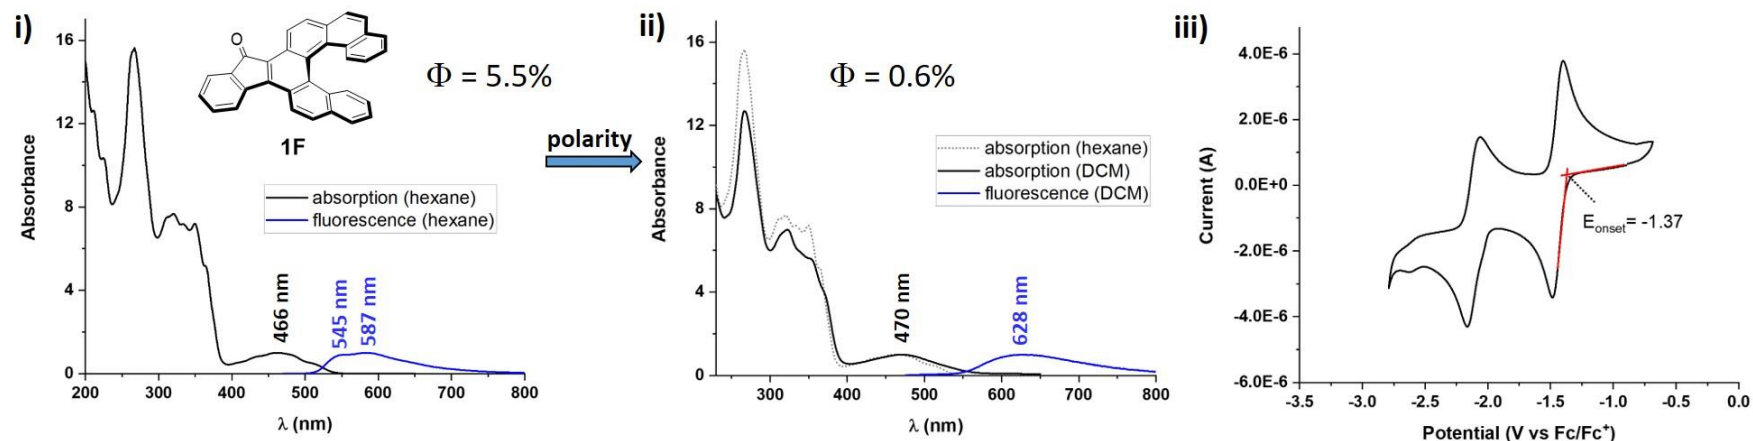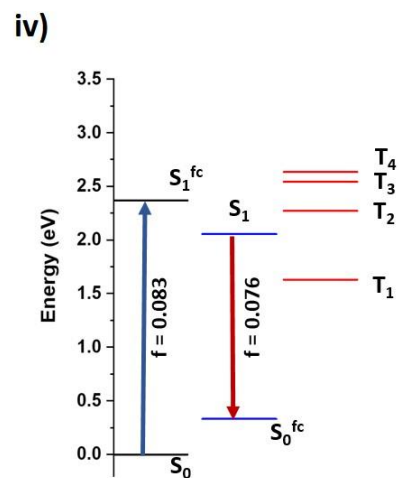

| $\lambda_{\text{onset}}$<br>[nm] | $\lambda_{\text{(em)}} \lambda_{\text{(exc)}}^a$<br>[nm] | $\Phi_{\text{PL}}^b$<br>(%) | $t_{\text{fl}}$<br>[ns] | $k_r^c$<br>[ $10^7 \text{ s}^{-1}$ ] | $k_{\text{nr}}^d$<br>[ $10^7 \text{ s}^{-1}$ ] | $E_{\text{HOMO}}^e$<br>[eV] | $E_{\text{LUMO}}^f$<br>[eV] | $E_{(0,0)}^g$<br>[eV] | $E_{(0,0)}^h$<br>[eV] |
|----------------------------------|----------------------------------------------------------|-----------------------------|-------------------------|--------------------------------------|------------------------------------------------|-----------------------------|-----------------------------|-----------------------|-----------------------|
| DCM                              | DCM                                                      | hexane/DCM/ACN              | hexane/DCM/ACN          | hexane/DCM/ACN                       | Hexane/DCM/ACN                                 |                             |                             | Hexane<br>(DCM)       |                       |
| 541                              | 628(303)                                                 | 5.5/0.6/0.6                 | 6.38/1.14/1.15          | 0.86/0.53/0.52                       | 14.8/87.2/86.4                                 | -5.8                        | -3.43                       | 2.37<br>(2.24)        | 2.05                  |

| State | E<br>[eV]<br>DCM |
|-------|------------------|
| $S_1$ | 2.05             |
| $T_1$ | 1.630            |
| $T_2$ | 2.271            |
| $T_3$ | 2.541            |
| $T_4$ | 2.633            |

a) wavelength of excitation b) Measured at room temperature ( $c \approx 1 \times 10^{-6} \text{ M}$ ) c) radiative rate constant calculated as  $k_r = \Phi_{\text{PL}}/t_{\text{fl}}$  d) nonradiative decay rate constant calculated as  $\Phi_{\text{PL}} = k_r/(k_r+k_{\text{nr}})$  e) Calculated as  $E_{\text{HOMO}} = E_{\text{LUMO}} - E(0,0)$  f) Calculated using the equation  $E_{\text{LUMO}} = -[E'_{\text{red/onset}} + 4.8]$  referenced against  $\text{Fc}/\text{Fc}^+$  g) Determined from the intersection of the absorption and emission curves and using equation  $E_g = hc/\lambda$  h) Calculated by TDDFT M06/6-31G(d,p) method

i) UV-vis absorption and emission ( $\lambda_{\text{(exc)}} = 303\text{nm}$ ) in hexane ii) UV-vis absorption and emission ( $\lambda_{\text{(exc)}} = 303\text{nm}$ ) in dichloromethane (DCM) iii) CV voltammogram vs  $\text{Fc}/\text{Fc}^+$  redox couple in dimethylformamide (DMF) with a supporting electrolyte  $[\text{Bu}_4\text{N}][\text{PF}_6]$  (0.1M), at a scan rate  $0.1 \text{ V s}^{-1}$  iv) Energy-level diagram calculated by TDDFT M06/6-31G(d,p) method in ACN.





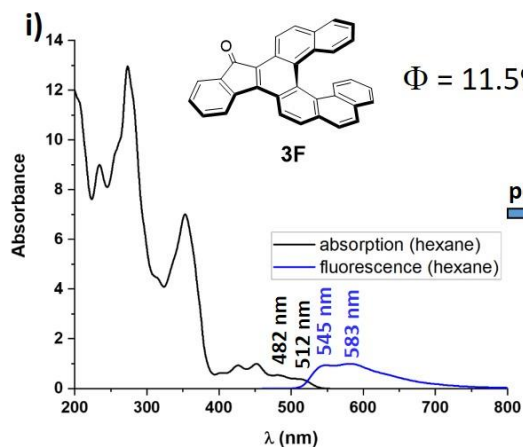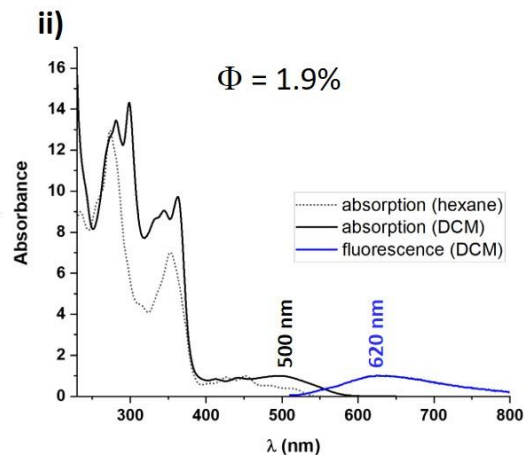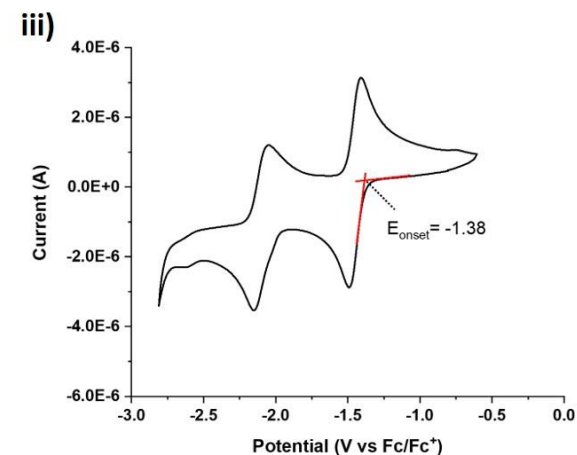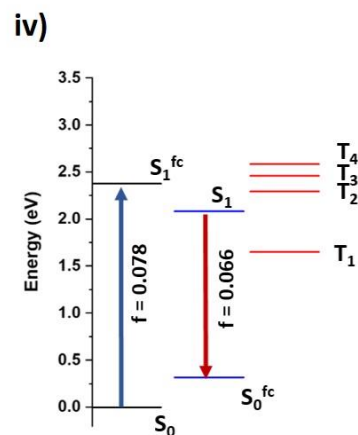

| $\lambda_{\text{(onset)}}$<br>[nm] | $\lambda_{\text{(em)}}$ $\lambda_{\text{(exc)}}$ <sup>a</sup><br>[nm] | $\Phi_{\text{PL}}$ <sup>b</sup><br>(%) | $\tau_{\text{fl}}$<br>[ns] | $k_r$ <sup>c</sup><br>[ $10^7 \text{ s}^{-1}$ ] | $k_{\text{nr}}$ <sup>d</sup><br>[ $10^7 \text{ s}^{-1}$ ] | $E_{\text{HOMO}}$ <sup>e</sup><br>[eV] | $E_{\text{LUMO}}$ <sup>f</sup><br>[eV] | $E_{(0,0)}$ <sup>g</sup><br>[eV] | $E_{(0,0)}$ <sup>h</sup><br>[eV] |
|------------------------------------|-----------------------------------------------------------------------|----------------------------------------|----------------------------|-------------------------------------------------|-----------------------------------------------------------|----------------------------------------|----------------------------------------|----------------------------------|----------------------------------|
| DCM                                | DCM                                                                   | hexane/DCM/ACN                         | hexane/DCM/ACN             | hexane/DCM/ACN                                  | Hexane/DCM/ACN                                            |                                        |                                        | Hexane<br>(DCM)                  |                                  |
| 580                                | 620(303)                                                              | 11.5/1.9/1.85                          | 9.21/1.9/2.0               | 1.2/1.1/0.9                                     | 9.8/57.4/49.1                                             | -5.79                                  | -3.42                                  | 2.37<br>(2.27)                   | 2.08                             |

| State | E<br>[eV]<br>DCM |
|-------|------------------|
| $S_1$ | 2.081            |
| $T_1$ | 1.650            |
| $T_2$ | 2.296            |
| $T_3$ | 2.458            |
| $T_4$ | 2.583            |

a) wavelength of excitation b) Measured at room temperature ( $c \approx 1 \times 10^{-6} \text{ M}$ ) c) radiative rate constant calculated as  $k_r = \Phi_{\text{PL}}/\tau_{\text{fl}}$  d) nonradiative decay rate constant calculated as  $\Phi_{\text{PL}} = k_r/(k_r+k_{\text{nr}})$  e) Calculated as  $E_{\text{HOMO}} = E_{\text{LUMO}} - E(0,0)$  f) Calculated using the equation  $E_{\text{LUMO}} = -[E'_{\text{red/onset}} + 4.8]$  referenced against Fc/Fc<sup>+</sup> g) Determined from the intersection of the absorption and emission curves and using equation  $E_g = hc/\lambda$  h) Calculated by TDDFT M06/6-31G(d,p) method

i) UV-vis absorption and emission ( $\lambda_{\text{(exc)}} = 303\text{nm}$ ) in hexane ii) UV-vis absorption and emission ( $\lambda_{\text{(exc)}} = 303\text{nm}$ ) in dichloromethane (DCM) iii) CV voltammogram vs Fc/Fc<sup>+</sup> redox couple in dimethylformamide (DMF) with a supporting electrolyte  $[\text{Bu}_4\text{N}][\text{PF}_6]$  (0.1M), at a scan rate  $0.1 \text{ V s}^{-1}$  iv) Energy-level diagram calculated by TDDFT M06/6-31G(d,p) method in ACN.

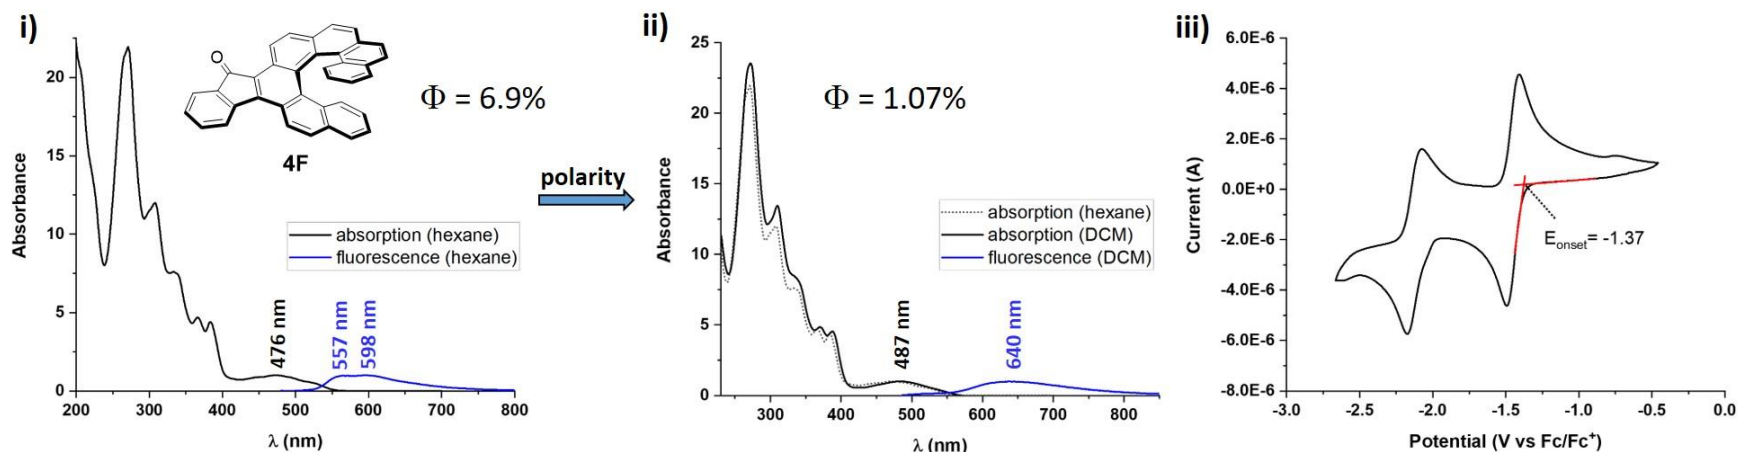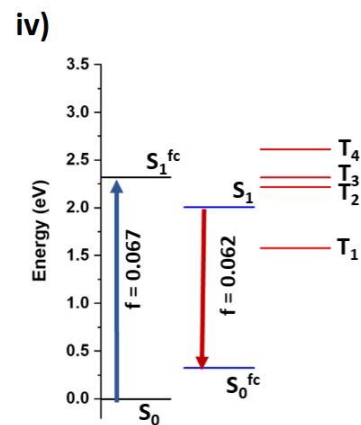

| $\lambda_{\text{onset}}$<br>[nm] | $\lambda_{\text{em}}$ $\lambda_{\text{exc}}$ <sup>a</sup><br>[nm] | $\Phi_{\text{PL}}$ <sup>b</sup><br>(%) | $t_{\text{fl}}$<br>[ns] | $k_r$ <sup>c</sup><br>[10 <sup>7</sup> s <sup>-1</sup> ] | $k_{\text{nr}}$ <sup>d</sup><br>[10 <sup>7</sup> s <sup>-1</sup> ] | $E_{\text{HOMO}}$ <sup>e</sup><br>[eV] | $E_{\text{LUMO}}$ <sup>f</sup><br>[eV] | $E_{(0,0)}$ <sup>g</sup><br>[eV] | $E_{(0,0)}$ <sup>h</sup><br>[eV] |
|----------------------------------|-------------------------------------------------------------------|----------------------------------------|-------------------------|----------------------------------------------------------|--------------------------------------------------------------------|----------------------------------------|----------------------------------------|----------------------------------|----------------------------------|
| DCM                              | DCM                                                               | hexane/DCM/ACN                         | hexane/DCM/ACN          | hexane/DCM/ACN                                           | Hexane/DCM/ACN                                                     |                                        |                                        | Hexane<br>(DCM)                  |                                  |
| 570                              | 640(303)                                                          | 6.9/1.07/0.76                          | 6.48/9.1/8.4            | 1.07/0.12/0.09                                           | 14.4/10.9/11.8                                                     | -5.68                                  | -3.37                                  | 2.31<br>(2.23)                   | 2.01                             |

| State          | E [eV] DCM |
|----------------|------------|
| S <sub>1</sub> | 2.006      |
| T <sub>1</sub> | 1.580      |
| T <sub>2</sub> | 2.215      |
| T <sub>3</sub> | 2.317      |
| T <sub>4</sub> | 2.612      |

a) wavelength of excitation b) Measured at room temperature ( $c \approx 1 \times 10^{-6}$  M) c) radiative rate constant calculated as  $k_r = \Phi_{\text{PL}}/t_{\text{fl}}$  d) nonradiative decay rate constant calculated as  $\Phi_{\text{PL}} = k_r/(k_r+k_{\text{nr}})$  e) Calculated as  $E_{\text{HOMO}} = E_{\text{LUMO}} - E(0,0)$  f) Calculated using the equation  $E_{\text{LUMO}} = -[E'_{\text{red/onset}} + 4.8]$  referenced against Fc/Fc<sup>+</sup> g) Determined from the intersection of the absorption and emission curves and using equation  $E_g = hc/\lambda$  h) Calculated by TDDFT M06/6-31G(d,p) method

i) UV-vis absorption and emission ( $\lambda_{\text{exc}} = 303\text{nm}$ ) in hexane ii) UV-vis absorption and emission ( $\lambda_{\text{exc}} = 303\text{nm}$ ) in dichloromethane (DCM) iii) CV voltammogram vs Fc/Fc<sup>+</sup> redox couple in dimethylformamide (DMF) with a supporting electrolyte [Bu<sub>4</sub>N][PF<sub>6</sub>] (0.1M), at a scan rate 0.1 V s<sup>-1</sup> iv) Energy-level diagram calculated by TDDFT M06/6-31G(d,p) method in ACN.

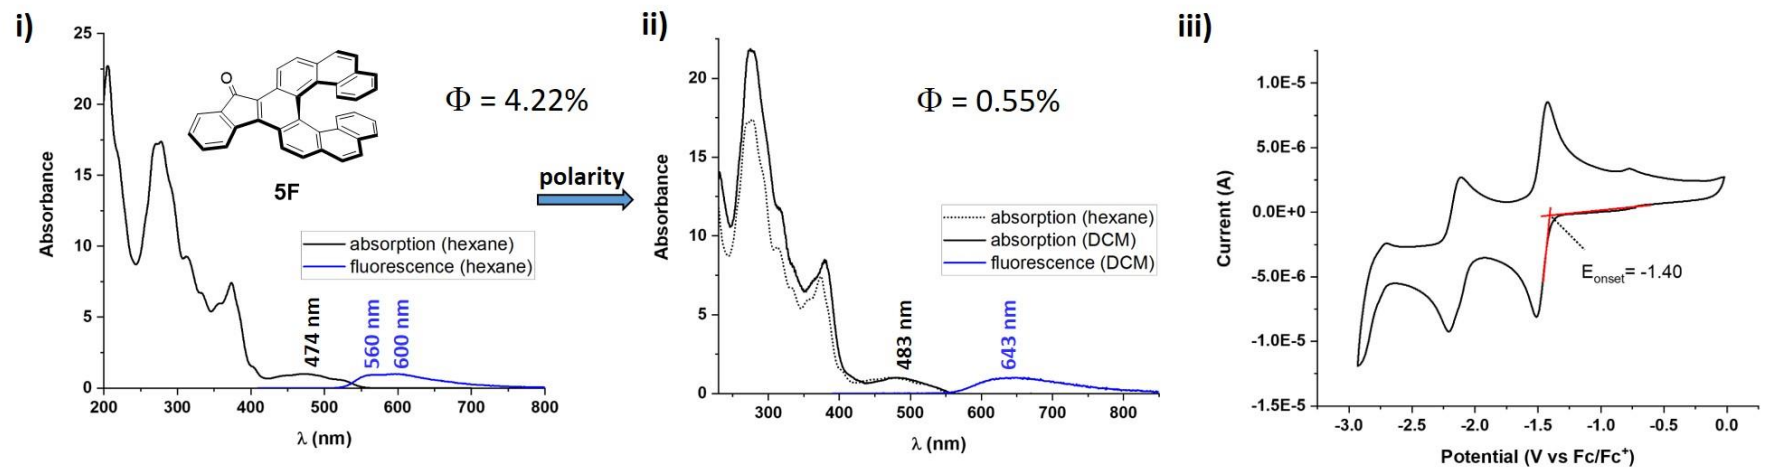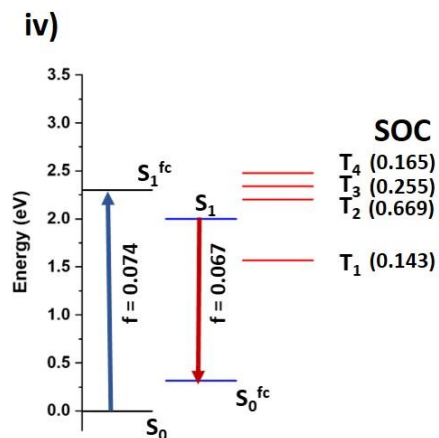

| $\lambda_{\text{(onset)}}$<br>[nm] | $\lambda_{\text{(em)}}$<br>[nm] | $\lambda_{\text{(exc)}}$ <sup>a</sup><br>[nm] | $\Phi_{\text{PL}}$ <sup>b</sup><br>(%) | $\tau_{\text{fl}}$ <sup>c</sup><br>[ns] | $k_{\text{r}}$ <sup>c</sup><br>[10 <sup>7</sup> s <sup>-1</sup> ] | $k_{\text{nr}}$ <sup>d</sup><br>[10 <sup>7</sup> s <sup>-1</sup> ] | $E_{\text{HOMO}}$ <sup>e</sup><br>[eV] | $E_{\text{LUMO}}$ <sup>f</sup><br>[eV] | $E_{\text{(0,0)}}$ <sup>g</sup><br>[eV] | $E_{\text{(0,0)}}$ <sup>h</sup><br>[eV] |
|------------------------------------|---------------------------------|-----------------------------------------------|----------------------------------------|-----------------------------------------|-------------------------------------------------------------------|--------------------------------------------------------------------|----------------------------------------|----------------------------------------|-----------------------------------------|-----------------------------------------|
| DCM                                | DCM                             | DCM                                           | hexane/DCM/ACN                         | hexane/DCM/ACN                          | hexane/DCM/ACN                                                    | Hexane/DCM/ACN                                                     |                                        |                                        | Hexane<br>(DCM)                         |                                         |
| 573                                | 643(336)                        | 303                                           | 4.22/0.55/0.61                         | 6.38/1.15/1.16                          | 0.66/0.47/0.53                                                    | 15/85.7/86.4                                                       | -5.71                                  | -3.4                                   | 2.31<br>(2.23)                          | 2.00                                    |

| State          | E<br>[eV] |
|----------------|-----------|
| S <sub>1</sub> | 2.001     |
| T <sub>1</sub> | 1.568     |
| T <sub>2</sub> | 2.205     |
| T <sub>3</sub> | 2.341     |
| T <sub>4</sub> | 2.479     |

a) wavelength of excitation b) Measured at room temperature (c  $\approx 1 \times 10^{-6}$  M) c) radiative rate constant calculated as  $k_{\text{r}} = \Phi_{\text{PL}}/\tau_{\text{fl}}$  d) nonradiative decay rate constant calculated as  $\Phi_{\text{PL}} = k_{\text{r}}/(k_{\text{r}}+k_{\text{nr}})$  e) Calculated as  $E_{\text{HOMO}} = E_{\text{LUMO}} - E(0,0)$  f) Calculated using the equation  $E_{\text{LUMO}} = -[E_{\text{red/onset}} + 4.8]$  referenced against Fc/Fc<sup>+</sup> g) Determined from the intersection of the absorption and emission curves and using equation  $E_{\text{g}} = hc/\lambda$  h) Calculated by TDDFT M06/6-31G(d,p) method

i) UV-vis absorption and emission ( $\lambda_{\text{(exc)}} = 303\text{nm}$ ) in hexane ii) UV-vis absorption and emission ( $\lambda_{\text{(exc)}} = 303\text{nm}$ ) in dichloromethane (DCM) iii) CV voltammogram vs Fc/Fc<sup>+</sup> redox couple in dimethylformamide (DMF) with a supporting electrolyte [Bu<sub>4</sub>N][PF<sub>6</sub>] (0.1M), at a scan rate 0.1 V s<sup>-1</sup> iv) Energy-level diagram calculated by TDDFT M06/6-31G(d,p) method in ACN.



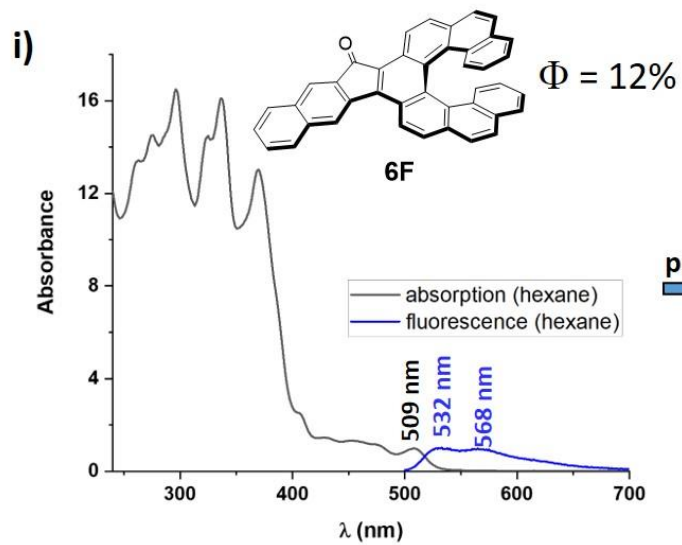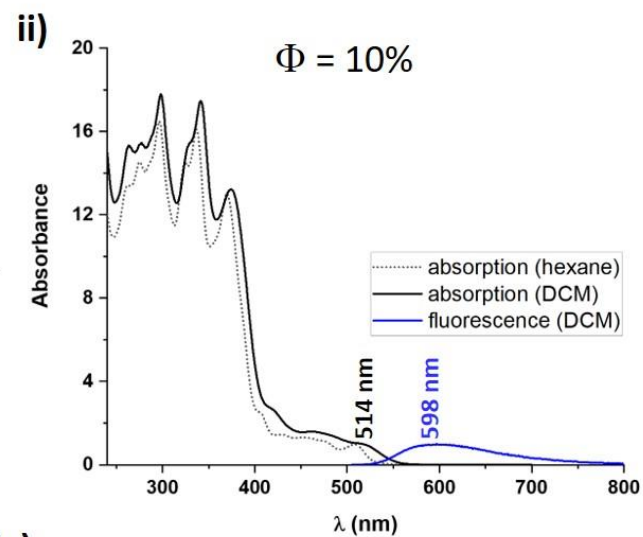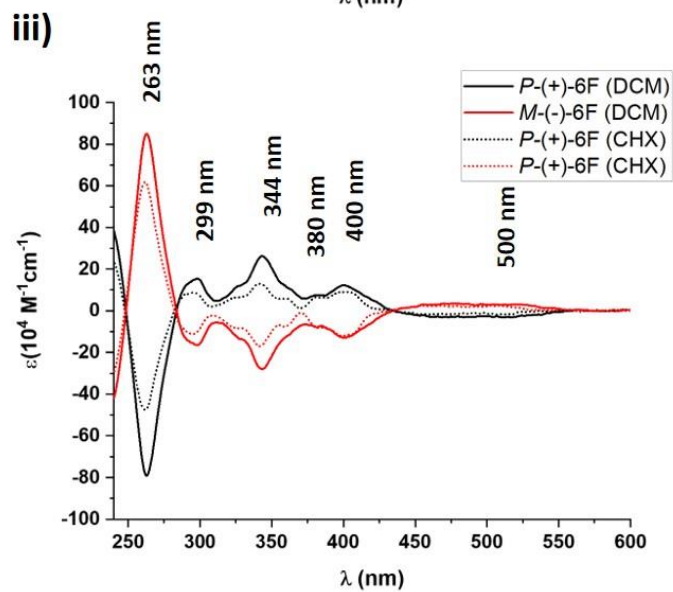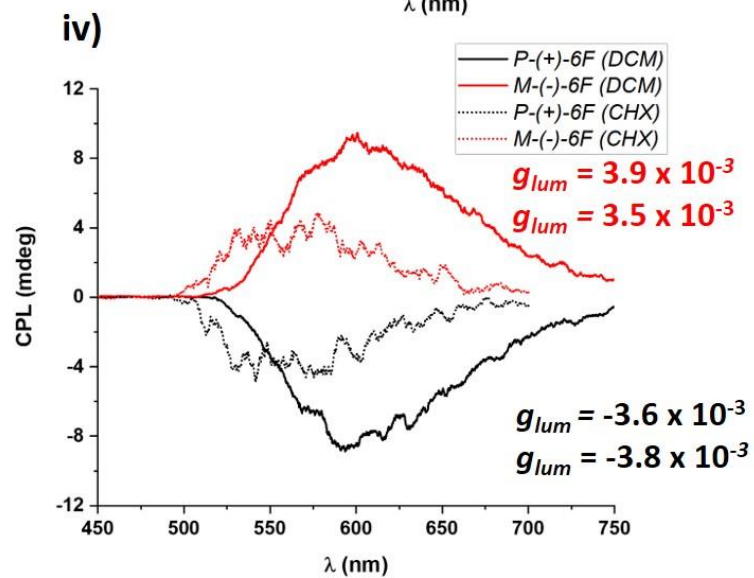

| <i>P</i> -(+) Peak at [nm] | $G_{abs}$ DCM (CHX)                              |
|----------------------------|--------------------------------------------------|
| 500                        | $-2.5 \cdot 10^{-3}$<br>( $-2.8 \cdot 10^{-3}$ ) |
| 400                        | $3.1 \cdot 10^{-3}$<br>( $5.8 \cdot 10^{-3}$ )   |
| 380                        | $0.7 \cdot 10^{-3}$<br>( $1.1 \cdot 10^{-3}$ )   |
| 344                        | $1.8 \cdot 10^{-3}$<br>( $1.6 \cdot 10^{-3}$ )   |
| 299                        | $0.8 \cdot 10^{-3}$<br>( $0.8 \cdot 10^{-3}$ )   |
| 263                        | $-5.7 \cdot 10^{-3}$<br>( $-5.9 \cdot 10^{-3}$ ) |

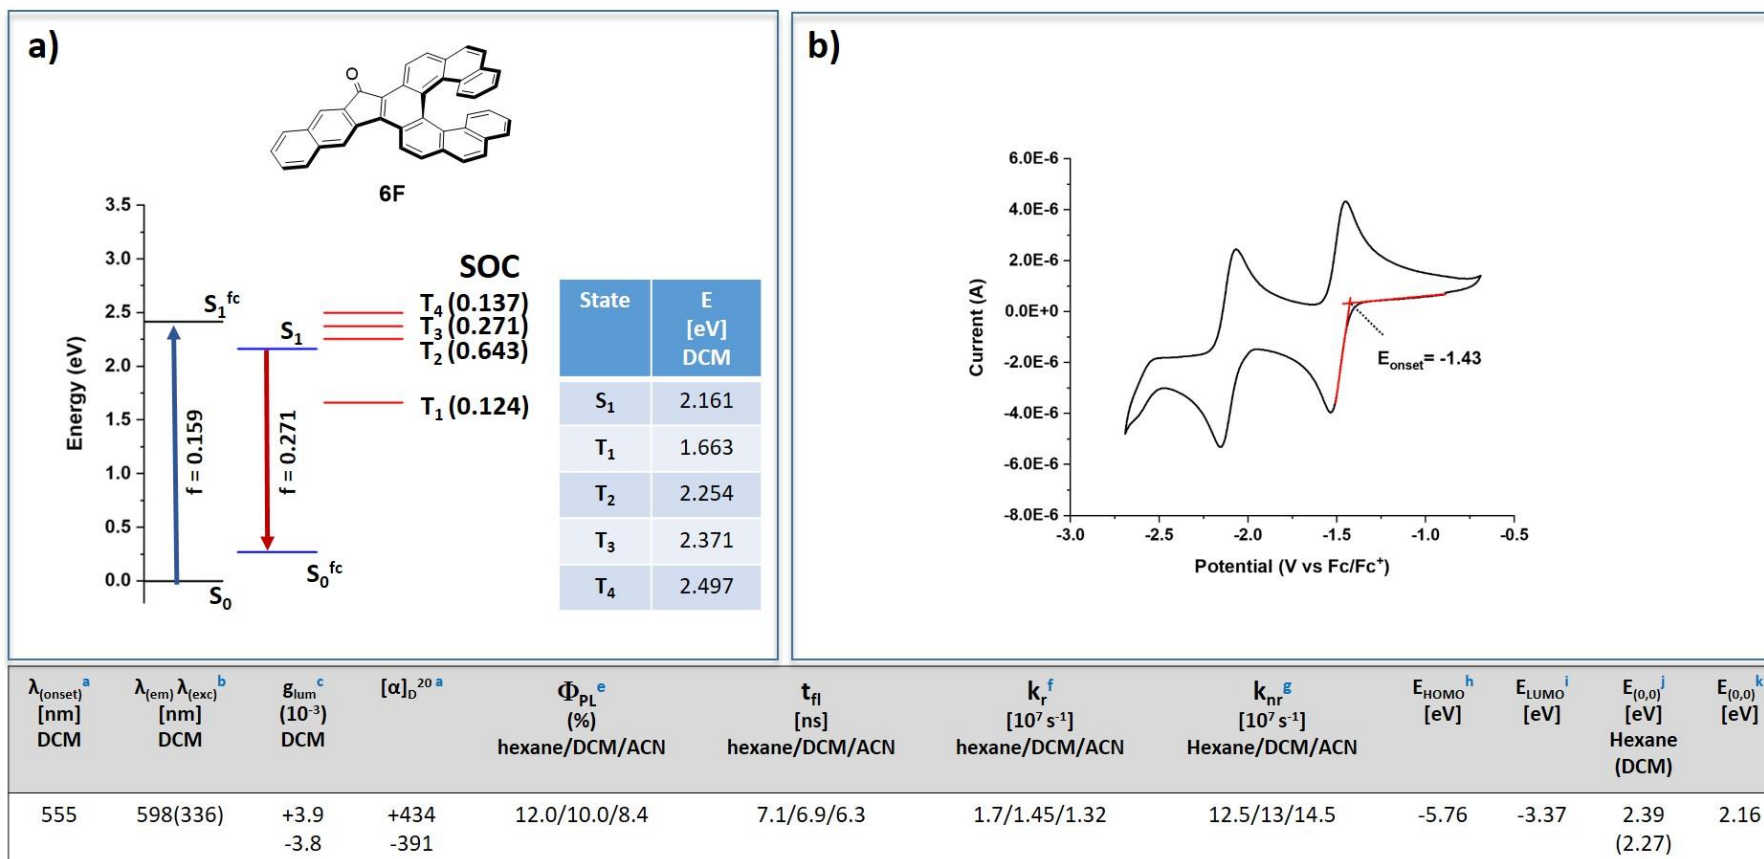

**a)** Measured in dichloromethane. **b)** wavelength of excitation **c)** Measured in dichloromethane ( $c \approx 1 \times 10^{-5}$  M) **e)** Measured at room temperature ( $c \approx 1 \times 10^{-6}$  M) **f)** radiative rate constant calculated as  $k_r = \Phi_{\text{PL}}/t_{\text{fl}}$  **g)** nonradiative decay rate constant calculated as  $\Phi_{\text{PL}} = k_r/(k_r+k_{\text{nr}})$  **h)** Calculated as  $E_{\text{HOMO}} = E_{\text{LUMO}} - E(0,0)$  **i)** Calculated using the equation  $E_{\text{LUMO}} = -[E'_{\text{red/onset}} + 4.8]$  referenced against Fc/Fc<sup>+</sup>. **j)** Determined from the intersection of the absorption and emission curves and using equation  $E_g = hc/\lambda$  **k)** Calculated by TDDFT M06/6-31G(d,p) method **l)** determined from the phosphorescence  $\lambda_{\text{onset}}$

**a)** Energy-level diagram calculated by TDDFT M06/6-31G(d,p) method in ACN. **b)** CV voltammogram vs Fc/Fc<sup>+</sup> redox couple in dimethylformamide (DMF) with a supporting electrolyte [Bu<sub>4</sub>N][PF<sub>6</sub>] (0.1M), at a scan rate 0.1 V s<sup>-1</sup>

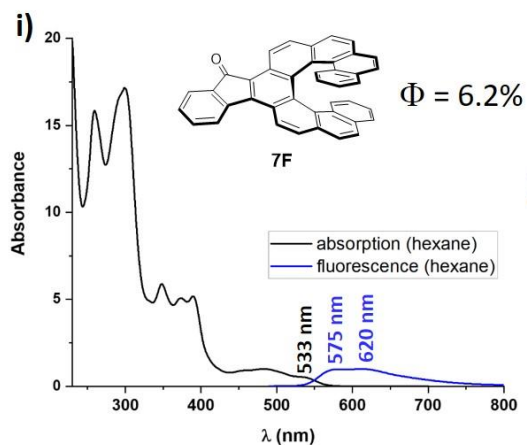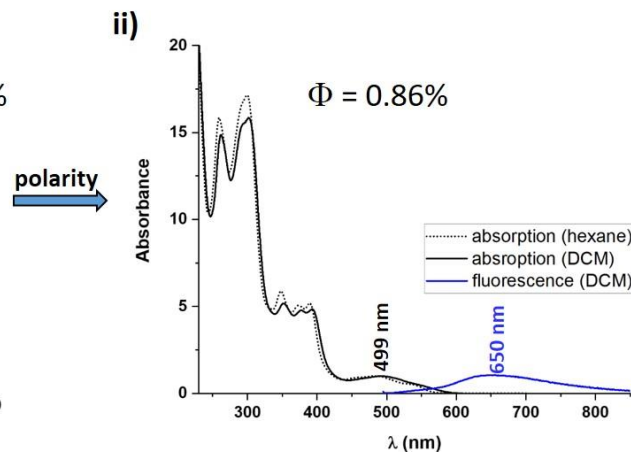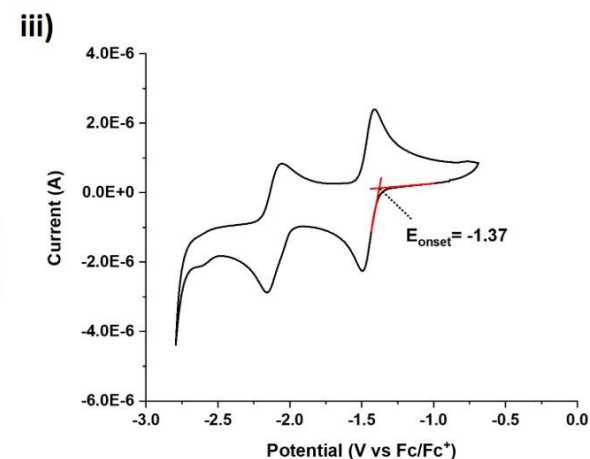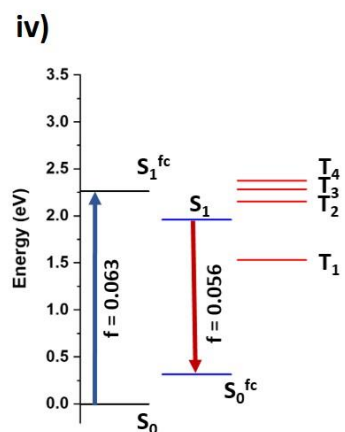

| $\lambda_{\text{(onset)}}$<br>[nm] | $\lambda_{\text{(em)}} \lambda_{\text{(exc)}}^{\text{a}}$<br>[nm] | $\Phi_{\text{PL}}^{\text{b}}$<br>(%)                                                                                                                                                                                                                                                                                                                                                                                                                                                                                                                                                                                                                                           | $t_{\text{fl}}^{\text{c}}$<br>[ns] | $k_{\text{r}}^{\text{c}}$<br>[ $10^7 \text{ s}^{-1}$ ] | $k_{\text{nr}}^{\text{d}}$<br>[ $10^7 \text{ s}^{-1}$ ] | $E_{\text{HOMO}}^{\text{e}}$<br>[eV] | $E_{\text{LUMO}}^{\text{f}}$<br>[eV] | $E_{\text{(0,0)}}^{\text{g}}$<br>[eV] | $E_{\text{(0,0)}}^{\text{h}}$<br>[eV] |
|------------------------------------|-------------------------------------------------------------------|--------------------------------------------------------------------------------------------------------------------------------------------------------------------------------------------------------------------------------------------------------------------------------------------------------------------------------------------------------------------------------------------------------------------------------------------------------------------------------------------------------------------------------------------------------------------------------------------------------------------------------------------------------------------------------|------------------------------------|--------------------------------------------------------|---------------------------------------------------------|--------------------------------------|--------------------------------------|---------------------------------------|---------------------------------------|
| DCM                                | DCM                                                               | hexane/DCM/ACN                                                                                                                                                                                                                                                                                                                                                                                                                                                                                                                                                                                                                                                                 | hexane/DCM/ACN                     | hexane/DCM/ACN                                         | Hexane/DCM/ACN                                          |                                      |                                      | Hexane<br>(DCM)                       |                                       |
| 596                                | 650(303)                                                          | 6.2/0.86/0.72                                                                                                                                                                                                                                                                                                                                                                                                                                                                                                                                                                                                                                                                  | 6.23/0.95/0.94                     | 1/0.91/0.76                                            | 15/105/105                                              | -5.69                                | -3.43                                | 2.26<br>(2.19)                        | 1.96                                  |
| State                              | E<br>[eV]                                                         | a) wavelength of excitation b) Measured at room temperature ( $c \approx 1 \times 10^{-6} \text{ M}$ ) c) radiative rate constant calculated as $k_{\text{r}} = \Phi_{\text{PL}}/t_{\text{fl}}$ d) nonradiative decay rate constant calculated as $\Phi_{\text{PL}} = k_{\text{r}}/(k_{\text{r}}+k_{\text{nr}})$ e) Calculated as $E_{\text{HOMO}} = E_{\text{LUMO}} - E(0,0)$ f) Calculated using the equation $E_{\text{LUMO}} = -[E'_{\text{red/onset}} + 4.8]$ referenced against Fc/Fc <sup>+</sup> g) Determined from the intersection of the absorption and emission curves and using equation $E_{\text{g}} = hc/\lambda$ h) Calculated by TDDFT M06/6-31G(d,p) method |                                    |                                                        |                                                         |                                      |                                      |                                       |                                       |
| S <sub>1</sub>                     | 1.96                                                              | i) UV-vis absorption and emission ( $\lambda_{\text{(exc)}} = 303\text{nm}$ ) in hexane ii) UV-vis absorption and emission ( $\lambda_{\text{(exc)}} = 303\text{nm}$ ) in dichloromethane (DCM) iii) CV voltammogram vs Fc/Fc <sup>+</sup> redox couple in dimethylformamide (DMF) with a supporting electrolyte [Bu <sub>4</sub> N][PF <sub>6</sub> ] (0.1M), at a scan rate 0.1 V s <sup>-1</sup> iv) Energy-level diagram calculated by TDDFT M06/6-31G(d,p) method in ACN.                                                                                                                                                                                                 |                                    |                                                        |                                                         |                                      |                                      |                                       |                                       |
| T <sub>1</sub>                     | 1.531                                                             |                                                                                                                                                                                                                                                                                                                                                                                                                                                                                                                                                                                                                                                                                |                                    |                                                        |                                                         |                                      |                                      |                                       |                                       |
| T <sub>2</sub>                     | 2.153                                                             |                                                                                                                                                                                                                                                                                                                                                                                                                                                                                                                                                                                                                                                                                |                                    |                                                        |                                                         |                                      |                                      |                                       |                                       |
| T <sub>3</sub>                     | 2.280                                                             |                                                                                                                                                                                                                                                                                                                                                                                                                                                                                                                                                                                                                                                                                |                                    |                                                        |                                                         |                                      |                                      |                                       |                                       |
| T <sub>4</sub>                     | 2.373                                                             |                                                                                                                                                                                                                                                                                                                                                                                                                                                                                                                                                                                                                                                                                |                                    |                                                        |                                                         |                                      |                                      |                                       |                                       |

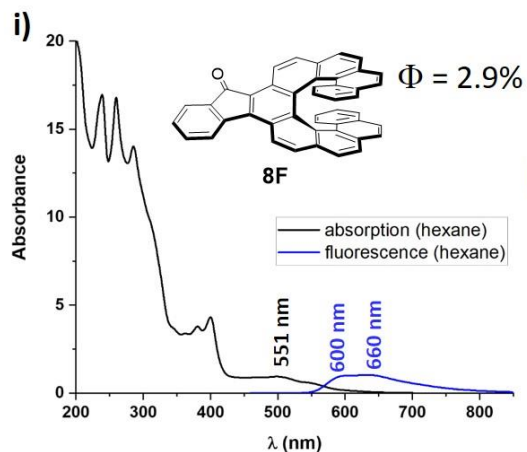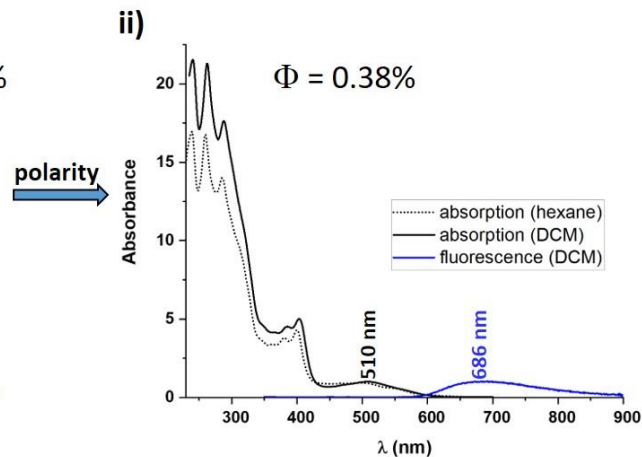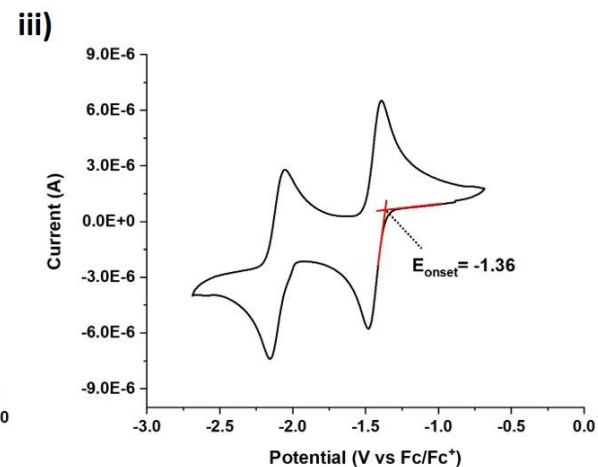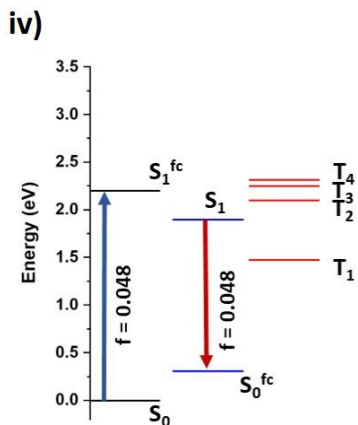

| $\lambda_{\text{onset}}$ [nm] | $\lambda_{\text{em}}$ $\lambda_{\text{exc}}$ <sup>a</sup> [nm] | $\Phi_{\text{PL}}$ <sup>b</sup> (%) | $t_{\text{fl}}$ [ns] | $k_r$ <sup>c</sup> [ $10^7 \text{ s}^{-1}$ ] | $k_{\text{nr}}$ <sup>d</sup> [ $10^7 \text{ s}^{-1}$ ] | $E_{\text{HOMO}}$ <sup>e</sup> [eV] | $E_{\text{LUMO}}$ <sup>f</sup> [eV] | $E_{\text{[0,0]}}$ <sup>g</sup> [eV] | $E_{\text{[0,0]}}$ <sup>h</sup> [eV] |
|-------------------------------|----------------------------------------------------------------|-------------------------------------|----------------------|----------------------------------------------|--------------------------------------------------------|-------------------------------------|-------------------------------------|--------------------------------------|--------------------------------------|
| DCM                           | DCM                                                            | hexane/DCM/ACN                      | hexane/DCM/ACN       | hexane/DCM/ACN                               | Hexane/DCM/ACN                                         |                                     |                                     | Hexane (DCM)                         |                                      |
| 605                           | 686(303)                                                       | 2.9/0.38/0.70                       | 5.07/0.74/0.76       | 0.57/0.51/0.92                               | 19.15/135/130                                          | -5.62                               | -3.44                               | 2.18                                 | 1.90 (2.07)                          |

| State | E [eV] |
|-------|--------|
| $S_1$ | 1.90   |
| $T_1$ | 1.472  |
| $T_2$ | 2.099  |
| $T_3$ | 2.252  |
| $T_4$ | 2.312  |

a) wavelength of excitation b) Measured at room temperature ( $c \approx 1 \times 10^{-6} \text{ M}$ ) c) radiative rate constant calculated as  $k_r = \Phi_{\text{PL}}/t_{\text{fl}}$  d) nonradiative decay rate constant calculated as  $\Phi_{\text{PL}} = k_r/(k_r+k_{\text{nr}})$  e) Calculated as  $E_{\text{HOMO}} = E_{\text{LUMO}} - E(0,0)$  f) Calculated using the equation  $E_{\text{LUMO}} = -[E'_{\text{red/onset}} + 4.8]$  referenced against Fc/Fc<sup>+</sup> g) Determined from the intersection of the absorption and emission curves and using equation  $E_g = hc/\lambda$  h) Calculated by TDDFT M06/6-31G(d,p) method

i) UV-vis absorption and emission ( $\lambda_{\text{exc}} = 303 \text{ nm}$ ) in hexane ii) UV-vis absorption and emission ( $\lambda_{\text{exc}} = 303 \text{ nm}$ ) in dichloromethane (DCM) iii) CV voltammogram vs Fc/Fc<sup>+</sup> redox couple in dimethylformamide (DMF) with a supporting electrolyte  $[\text{Bu}_4\text{N}][\text{PF}_6]$  (0.1M), at a scan rate  $0.1 \text{ V s}^{-1}$  iv) Energy-level diagram calculated by TDDFT M06/6-31G(d,p) method in ACN.



**Table S2: photophysical data**

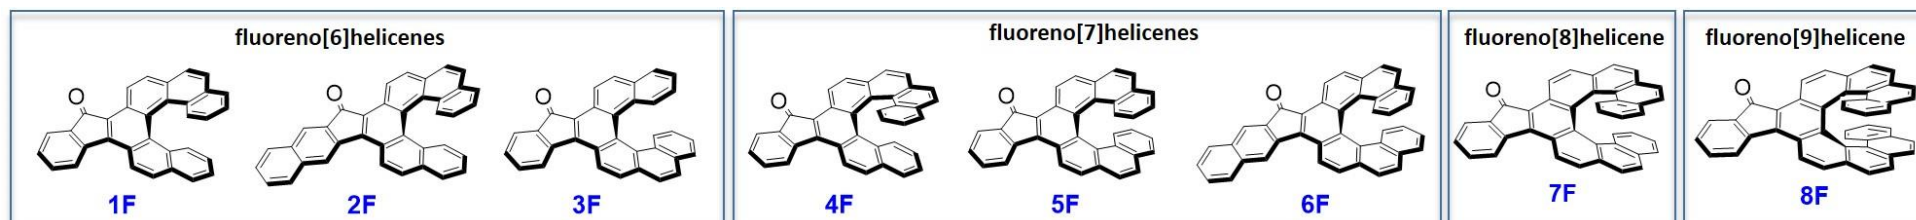

| Helicene  | $\lambda_{(\text{onset})}$<br>[nm]<br>hexane | $\lambda_{(\text{em})} \lambda_{(\text{exc})}^{\text{a}}$<br>[nm]<br>hexane | $\Phi_{\text{PL}}^{\text{b}}$<br>(%)<br>hexane/DCM/ACN | $t_{\text{fl}}$<br>[ns]<br>hexane/DCM/ACN | $k_r^{\text{c}}$<br>[ $10^7 \text{ s}^{-1}$ ]<br>hexane/DCM/ACN | $k_{\text{nr}}^{\text{d}}$<br>[ $10^7 \text{ s}^{-1}$ ]<br>Hexane/DCM/ACN | $E_{\text{HOMO}}^{\text{e}}$<br>[eV] | $E_{\text{LUMO}}^{\text{f}}$<br>[eV] | $E_{(0,0)}^{\text{g}}$<br>[eV]<br>Hexane (DCM) | $E_{(0,0)}^{\text{h}}$<br>[eV] |
|-----------|----------------------------------------------|-----------------------------------------------------------------------------|--------------------------------------------------------|-------------------------------------------|-----------------------------------------------------------------|---------------------------------------------------------------------------|--------------------------------------|--------------------------------------|------------------------------------------------|--------------------------------|
| <b>1F</b> | 535                                          | 545(303)                                                                    | 5.5/0.6/0.6                                            | 6.38/1.14/1.15                            | 0.86/0.53/0.52                                                  | 14.8/87.2/86.4                                                            | -5.8                                 | -3.43                                | 2.37<br>(2.24)                                 | 2.05                           |
| <b>2F</b> | 515                                          | 521(336)                                                                    | 22.0/13.9/13.5                                         | 10.2/8.96/8.28                            | 2.2/1.5/1.6                                                     | 7.6/9.6/10.4                                                              | -5.87                                | -3.43                                | 2.44<br>(2.34)                                 | 2.22                           |
| <b>3F</b> | 534                                          | 545(303)                                                                    | 11.5/1.9/1.85                                          | 9.21/1.9/2.0                              | 1.2/1.1/0.9                                                     | 9.8/57.4/49.1                                                             | -5.79                                | -3.42                                | 2.37<br>(2.27)                                 | 2.08                           |
| <b>4F</b> | 549                                          | 557(303)                                                                    | 6.9/1.07/0.76                                          | 6.48/9.1/8.4                              | 1.07/0.12/0.09                                                  | 14.4/10.9/11.8                                                            | -5.68                                | -3.37                                | 2.31<br>(2.23)                                 | 2.01                           |
| <b>5F</b> | 549                                          | 560(336)                                                                    | 4.22/0.55/0.61                                         | 6.38/1.15/1.16                            | 0.66/0.47/0.53                                                  | 15.0/85.7/86.4                                                            | -5.71                                | -3.4                                 | 2.31<br>(2.23)                                 | 2.00                           |
| <b>6F</b> | 528                                          | 532(336)                                                                    | 12.0/10.0/8.4                                          | 7.1/6.9/6.3                               | 1.7/1.45/1.32                                                   | 12.5/13.0/14.5                                                            | -5.76                                | -3.37                                | 2.39<br>(2.27)                                 | 2.16                           |
| <b>7F</b> | 560                                          | 575(303)                                                                    | 6.2/0.86/0.72                                          | 6.23/0.95/0.94                            | 1.0/0.91/0.76                                                   | 15.0/104.9/105.4                                                          | -5.69                                | -3.43                                | 2.26<br>(2.19)                                 | 1.96                           |
| <b>8F</b> | 588                                          | 600(303)                                                                    | 2.9/0.38/0.70                                          | 5.07/0.74/0.76                            | 0.57/0.51/0.92                                                  | 19.15/135.0/130.1                                                         | -5.62                                | -3.44                                | 2.18<br>(2.07)                                 | 1.90                           |

- a) Wavelength of excitation b) Measured in dichloromethane (c  $\approx 1 \times 10^{-5}$  M) c) radiative rate constant calculated as  $k_r = \Phi_{\text{PL}}/t_{\text{fl}}$  d) nonradiative decay rate constant calculated as  $\Phi_{\text{PL}} = k_r/(k_r+k_{\text{nr}})$  e) Calculated as  $E_{\text{HOMO}} = E_{\text{LUMO}} - E(0,0)$  f) Calculated using the equation  $E_{\text{LUMO}} = -[E'_{\text{red/onset}} + 4.8]$  referenced against Fc/Fc<sup>+</sup>. g) Determined from the intersection of the absorption and emission curves and using equation  $E_g = hc/\lambda$  h) Calculated by TDDFT M06/6-31G(d,p) method

**Figure S31.** Plots showing the evolution of energy levels.

Evolution of the HOMO-LUMO gap in the aceno-helicenes

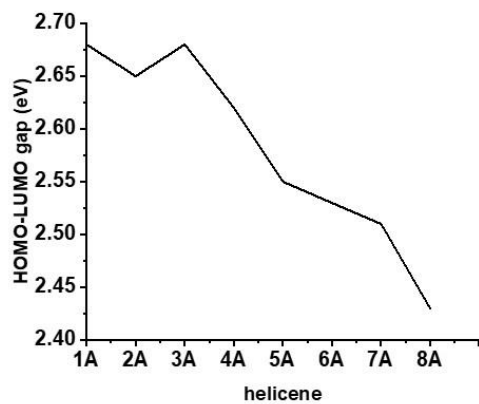

Evolution of the singlet-triplet gap ( $T_1-S_0$ ) in the aceno-helicenes

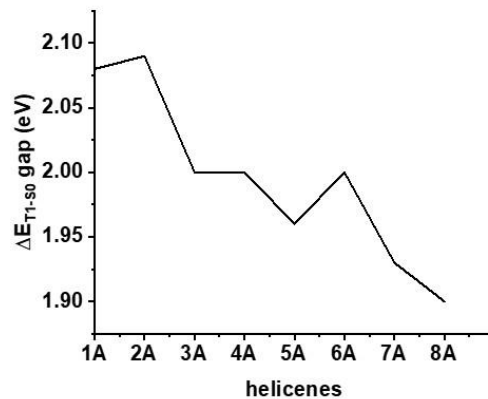

Evolution of the singlet-triplet ( $S_1-T_1$ ) gap in the aceno-helicenes

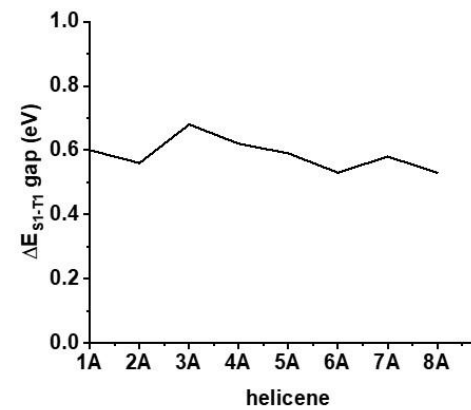

Evolution of the HOMO-LUMO gap in the fluoreno-helicenes

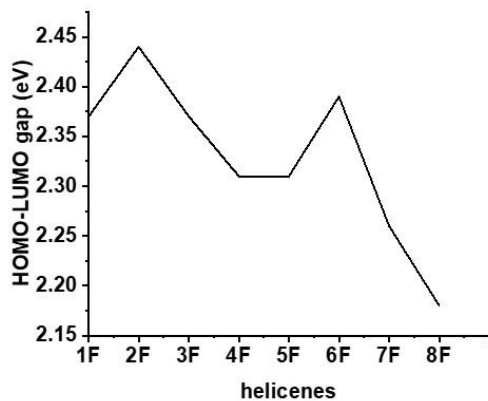

Evolution of the singlet-triplet gap ( $T_1-S_0$ ) in the fluoreno-helicenes

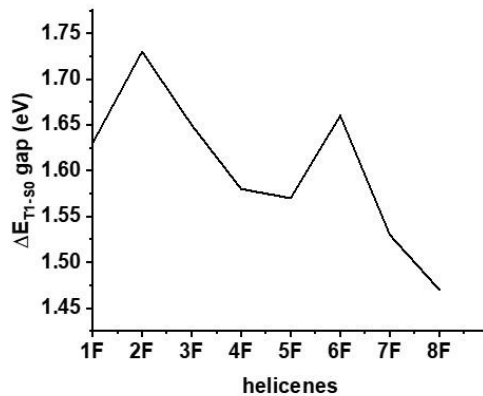

Evolution of the singlet-triplet ( $S_1-T_1$ ) gap in the fluoreno-helicenes

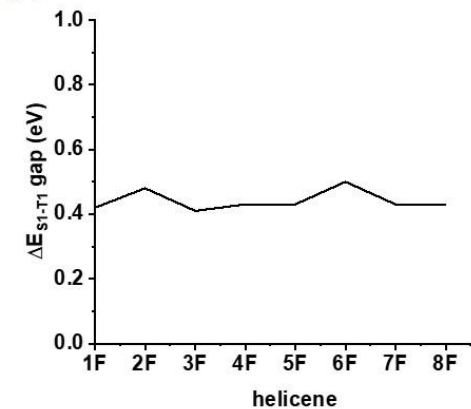

## Experimental and Calculated Circular Dichroism Spectra

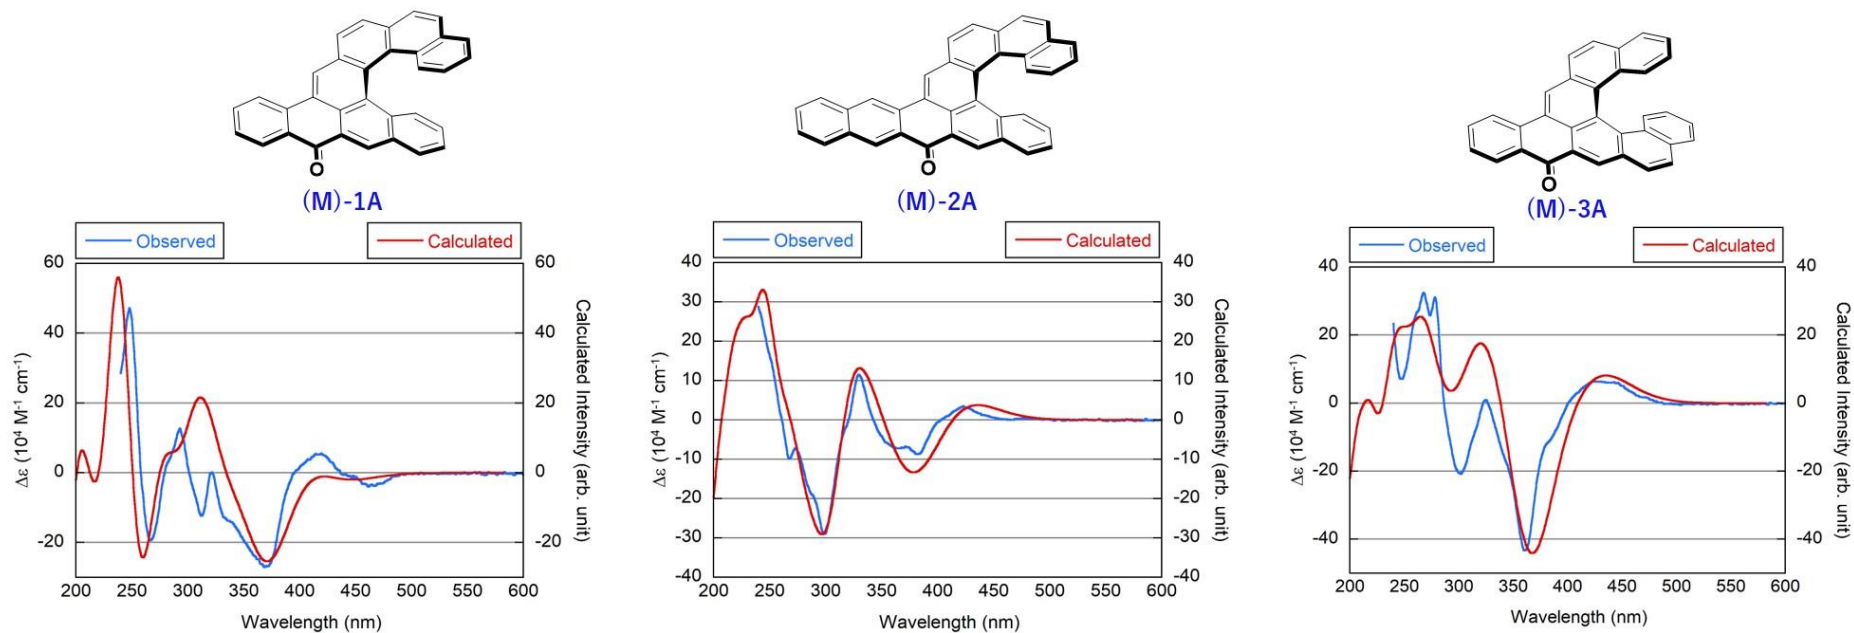

All calculations were performed using Gaussian 16 Rev C.02. The molecular geometries were optimized at the CAM-B3LYP/Def2SVP level. The CD spectra were calculated using the time-dependent density functional theory (TD-DFT) method at the CAM-B3LYP/Def2TZVP level with the solvent effect (dichloromethane; SMD model). The calculated spectra were shifted by  $-0.35 \text{ eV}$  to compensate for the overestimation of the vertical excitation energy by the CAM-B3LYP functional.

## Experimental and Calculated Circular Dichroism Spectra

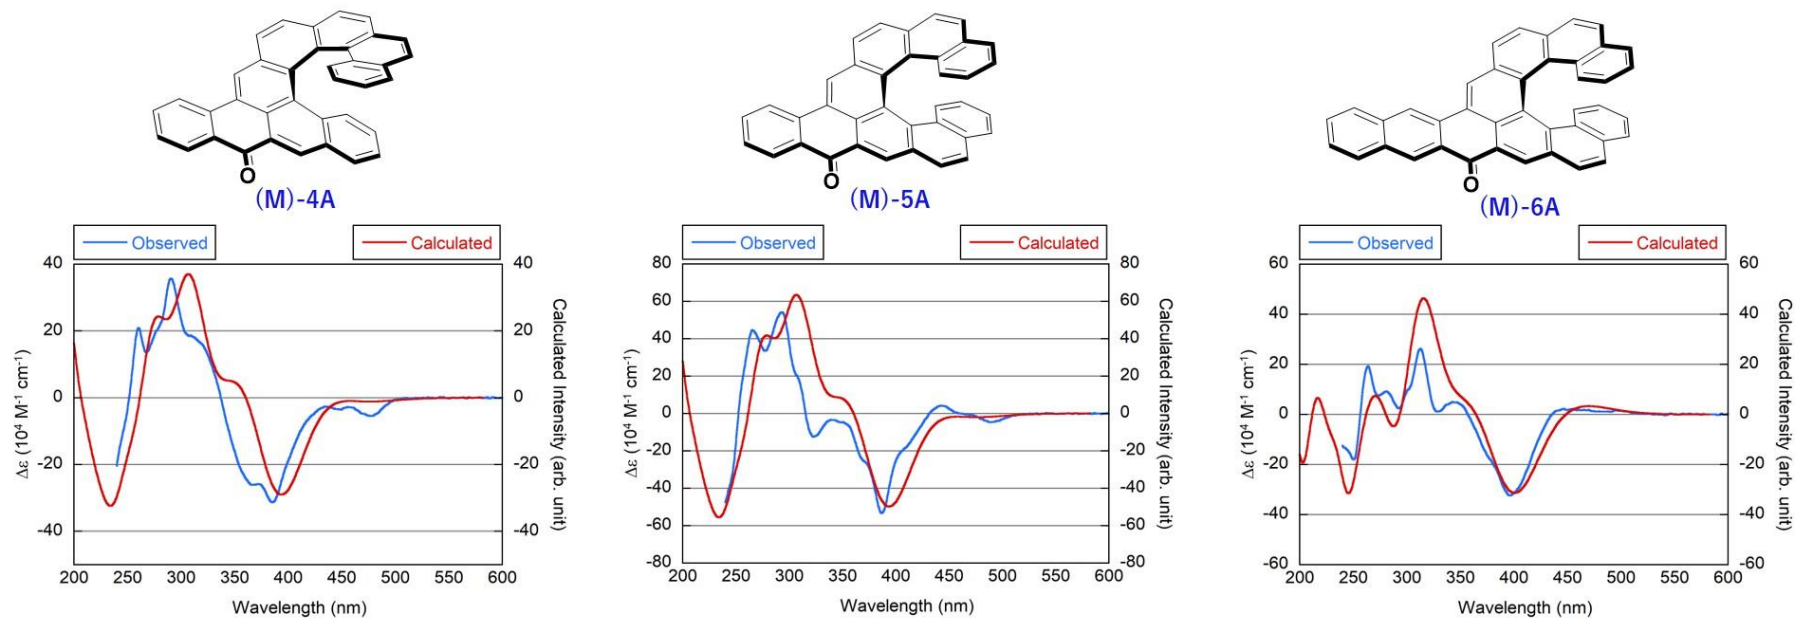

All calculations were performed using Gaussian 16 Rev C.02. The molecular geometries were optimized at the CAM-B3LYP/Def2SVP level. The CD spectra were calculated using the time-dependent density functional theory (TD-DFT) method at the CAM-B3LYP/Def2TZVP level with the solvent effect (dichloromethane; SMD model). The calculated spectra were shifted by  $-0.35 \text{ eV}$  to compensate for the overestimation of the vertical excitation energy by the CAM-B3LYP functional.



## Experimental and Calculated Circular Dichroism Spectra

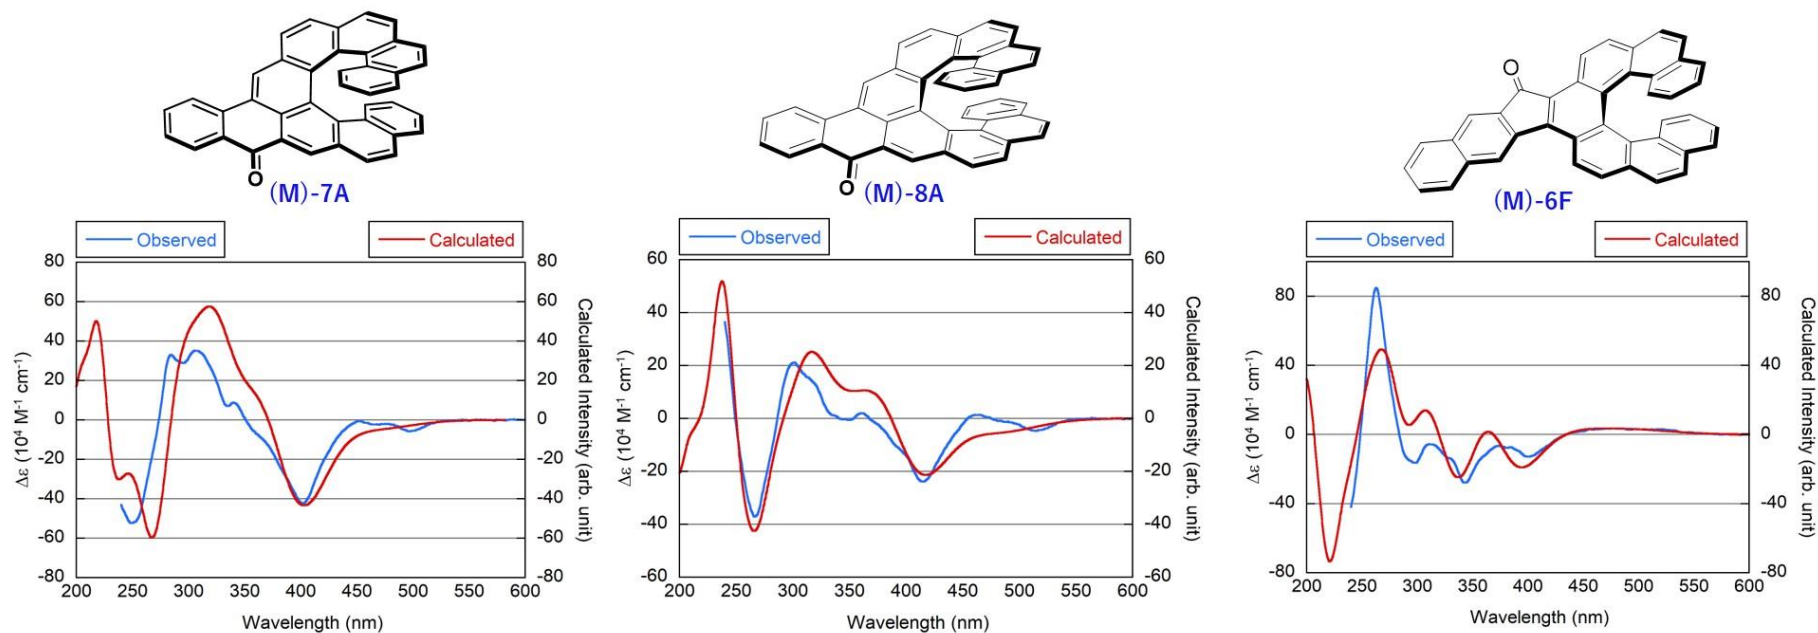

All calculations were performed using Gaussian 16 Rev C.02. The molecular geometries were optimized at the CAM-B3LYP/Def2SVP level. The CD spectra were calculated using the time-dependent density functional theory (TD-DFT) method at the CAM-B3LYP/Def2TZVP level with the solvent effect (dichloromethane; SMD model). The calculated spectra were shifted by  $-0.35 \text{ eV}$  to compensate for the overestimation of the vertical excitation energy by the CAM-B3LYP functional.

**Figure S32**

Comparison of HOMO and LUMO orbitals with apparent loss of symmetry

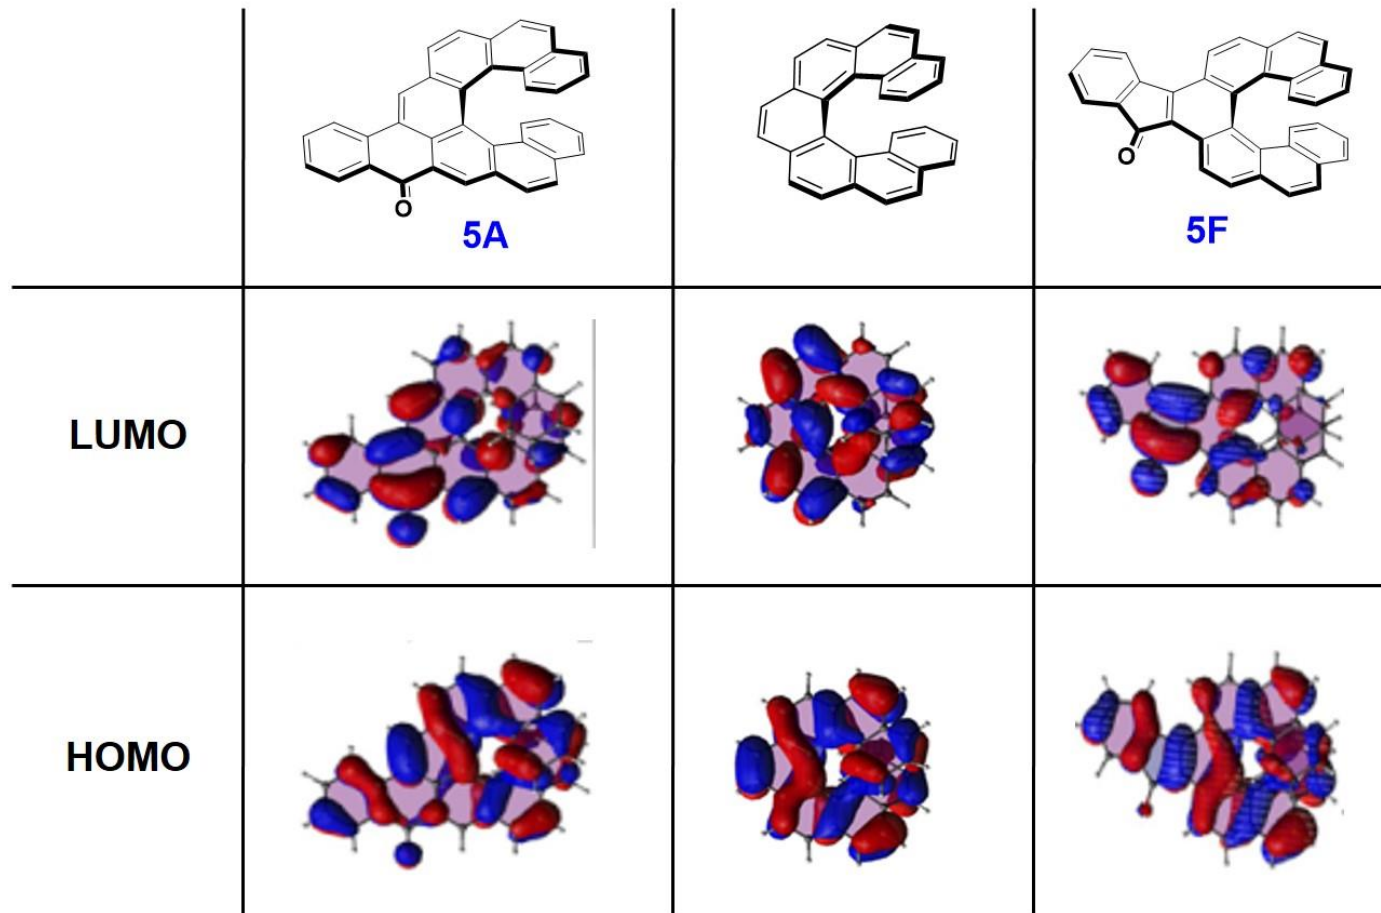

**Table S3****Dipole moments of acenohelicenes in the ground and excited state**

| <b>acenohelicene</b> | <b>Hexane<br/><math>\mu(S_0) / \mu(S_1)</math></b> | <b>DCM<br/><math>\mu(S_0) / \mu(S_1)</math></b> | <b>ACN<br/><math>\mu(S_0) / \mu(S_1)</math></b> |
|----------------------|----------------------------------------------------|-------------------------------------------------|-------------------------------------------------|
| <b>1A</b>            | 4.30 D / 10.37 D                                   | 5.20 D / 11.11 D                                |                                                 |
| <b>2A</b>            | 3.79 D / 9.16 D                                    |                                                 | 4.89 D / 12.05 D                                |
| <b>3A</b>            | 4.69 D / 7.87 D                                    |                                                 | 5.87 D / 10.59 D                                |
| <b>4A</b>            | 4.12 D / 8.60 D                                    |                                                 | 5.44 D / 12.01 D                                |
| <b>5A</b>            | 4.70 D / 10.22 D                                   | 5.67 D / 12.64 D                                |                                                 |
| <b>6A</b>            | 4.15 D / 8.51D                                     | 5.05 D / 10.52 D                                |                                                 |
| <b>7A</b>            | 4.53 D / 9.30 D                                    |                                                 |                                                 |
| <b>8A</b>            | 4.72 D / 8.89 D                                    | 5.81 D / 11.32 D                                |                                                 |

# Figure S33

## Proposed mechanism for two single electron reductions

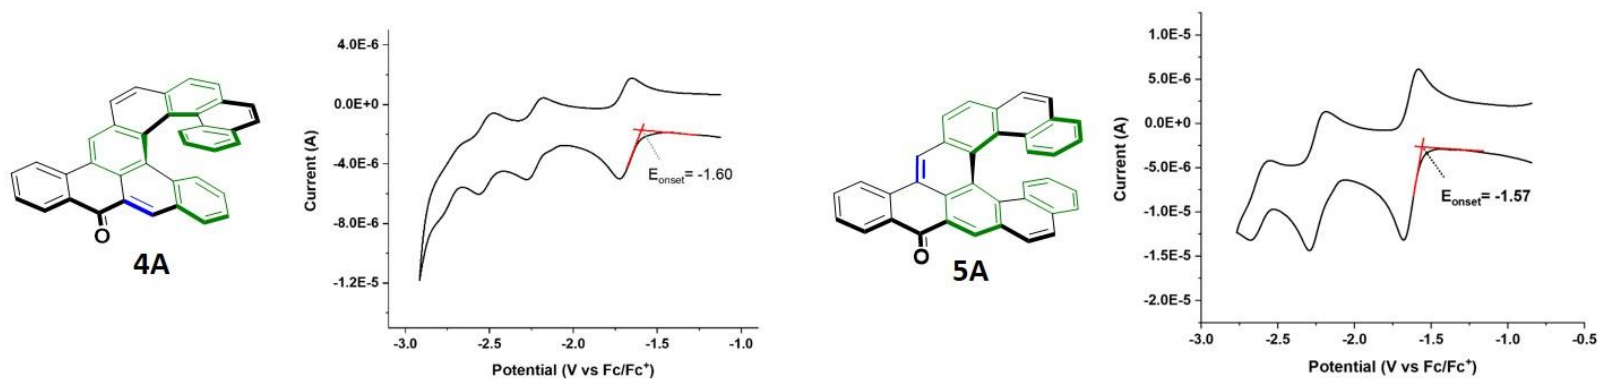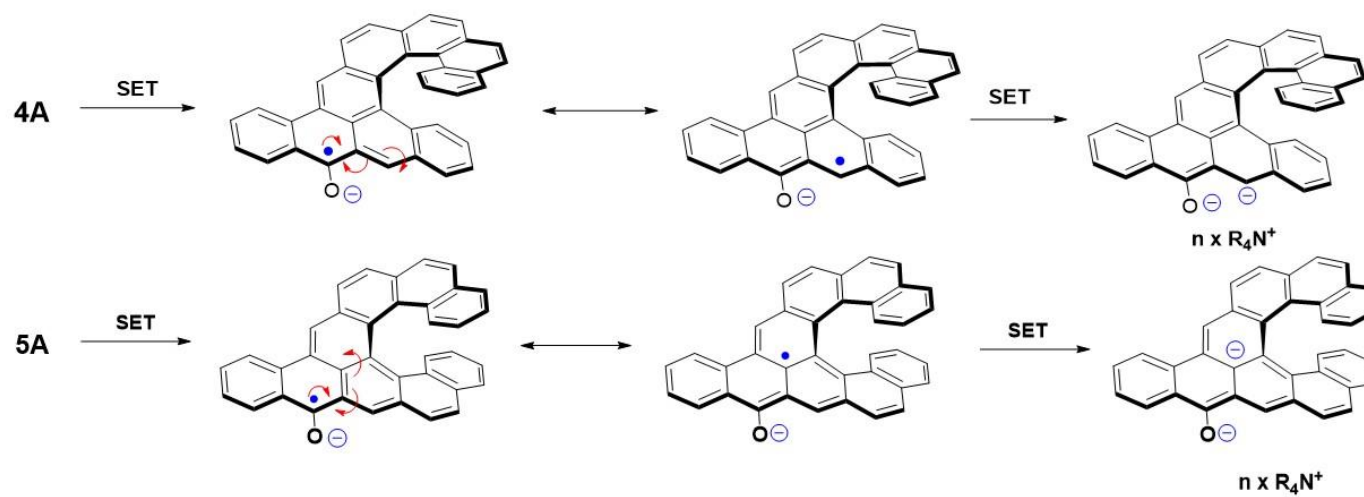



## Figure S34

X-ray structure and crystal packing of racemic **5F** (CCDC 2295946), racemic **6F** (CCDC 2295945) and racemic **8F** (CCDC 2295947). Two conformers of each enantiomer in a racemic mixture were found in the centrosymmetric unit cells of 5F and 6F. For 8F, the absolute structure cannot be determined reliably due to the source and the absence of strong scatterer / heavy atom.

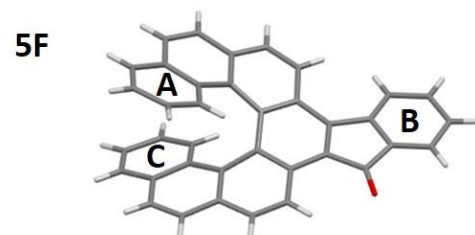

Interplanar angles:  
A, C rings: 25.16°  
B, A rings: 24.98°  
B, C rings: 22.28

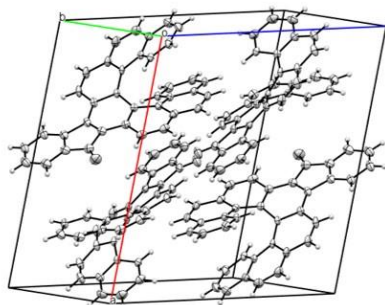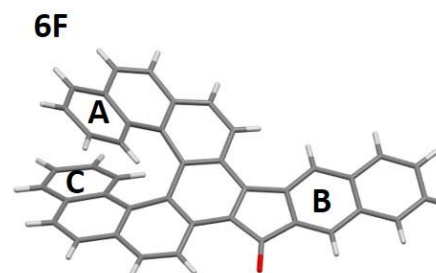

Interplanar angles:  
A, C rings: 30.48°  
A, B rings: 38.17°  
B, C rings: 33.94

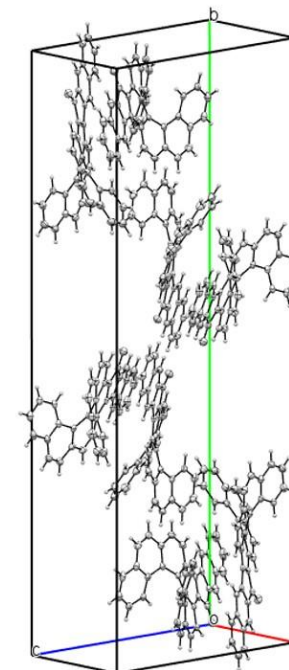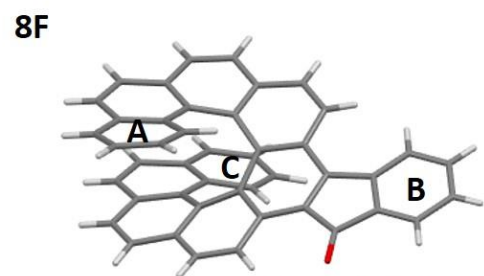

Interplanar angles:  
A, C rings: 15.65°  
B, A rings: 32.96°  
B, C rings: 31.68

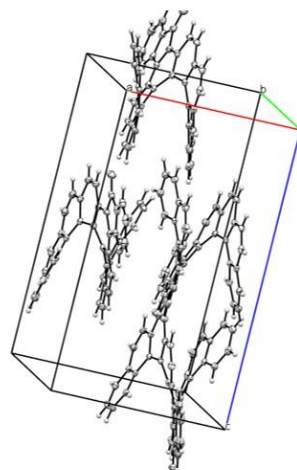

### Table S4: crystallographic data

| Compound                                                                 | 5F                                | 6F                                | 8F                                            |
|--------------------------------------------------------------------------|-----------------------------------|-----------------------------------|-----------------------------------------------|
| Formula                                                                  | C <sub>37</sub> H <sub>20</sub> O | C <sub>41</sub> H <sub>22</sub> O | C <sub>45</sub> H <sub>24</sub> O             |
| FW (g·mol <sup>-1</sup> )                                                | 480.53                            | 530.58                            | 580.64                                        |
| Crystal color                                                            | purple                            | orange                            | red                                           |
| Crystal size (mm)                                                        | 0.60 x 0.32 x 0.20                | 0.32 x 0.11 x 0.02                | 0.35 x 0.18 x 0.12                            |
| Crystal system                                                           | monoclinic                        | monoclinic                        | orthorhombic                                  |
| Space group                                                              | P2 <sub>1</sub> /c                | P2 <sub>1</sub> /c                | P2 <sub>1</sub> 2 <sub>1</sub> 2 <sub>1</sub> |
| Temperature                                                              | 120 K                             | 120 K                             | 120 K                                         |
| <i>a</i> (Å)                                                             | 15.5109(11)                       | 8.0168(4)                         | 10.6528(7)                                    |
| <i>b</i> (Å)                                                             | 8.9771(7)                         | 42.038(2)                         | 13.9671(9)                                    |
| <i>c</i> (Å)                                                             | 16.8196(13)                       | 15.3836(7)                        | 18.2044(11)                                   |
| $\beta$ (°)                                                              | 101.427(4)                        | 97.965(3)                         | 90                                            |
| <i>V</i> (Å <sup>3</sup> )                                               | 2295.6(3)                         | 5134.4(4)                         | 2708.6(3)                                     |
| <i>Z</i>                                                                 | 4                                 | 8                                 | 4                                             |
| <i>d</i> <sub>calc</sub>                                                 | 1.390                             | 1.373                             | 1.424                                         |
| $\mu$ (mm <sup>-1</sup> )                                                | 0.082                             | 0.081                             | 0.083                                         |
| $\theta_{\min}$ - $\theta_{\max}$                                        | 2.471 ° - 30.464 °                | 1.651 ° - 25.051 °                | 1.838° - 28.354°                              |
| Refl. coll. / unique                                                     | 156291 / 6760                     | 110110 / 9071                     | 201477 / 6779                                 |
| Completeness to 2 $\theta$                                               | 0.971                             | 0.996                             | 1.000                                         |
| <i>R</i> <sub>int</sub>                                                  | 0.0304                            | 0.0822                            | 0.0081                                        |
| Refined param./restr.                                                    | 343 / 0                           | 757 / 0                           | 416 / 0                                       |
| <sup>a</sup> <i>R</i> <sub>1</sub> ( <i>I</i> > 2 $\sigma$ ( <i>I</i> )) | 0.0861                            | 0.0632                            | 0.0442                                        |
| <sup>b</sup> w <i>R</i> <sub>2</sub> (all data)                          | 0.2198                            | 0.1397                            | 0.1296                                        |
| Goodness of fit                                                          | 1.164                             | 1.057                             | 1.117                                         |

$$^a R_1 = \frac{\sum ||F_o| - |F_c||}{\sum |F_o|} \text{ and } ^b wR_2 = [\frac{\sum w(F_o^2 - F_c^2)^2}{\sum w(F_o^2)^2}]^{1/2}$$

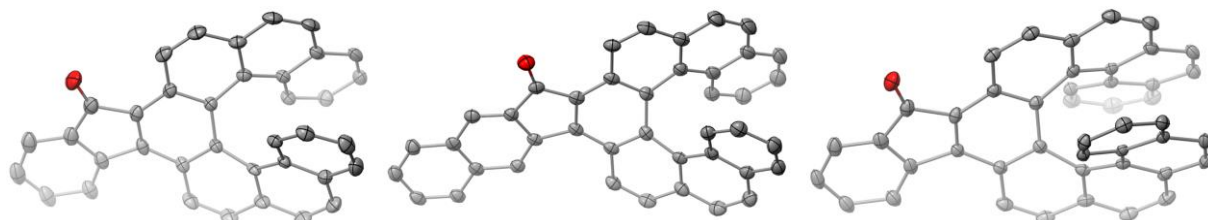

ORTEP-type views of 5F, 6F and 8F as found in the crystals at 120 K. Thermal ellipsoids are depicted at a 50 % probability level. H atoms are omitted for clarity. C: grey, O: red.

**Table S5.** xyz coordinates [in Å] and energies [in A.U.] of molecules optimised in ground (S0) and first electronically excited (S1) states

|   | 1A                      |         |         |                         |         |         |
|---|-------------------------|---------|---------|-------------------------|---------|---------|
|   | E(S0) = -1342.6886 A.U. |         |         | E(S1) = -1342.5935 A.U. |         |         |
|   | x                       | y       | z       | x                       | y       | z       |
| H | -6.0630                 | -1.4168 | 0.7522  | 5.9915                  | 1.5126  | 0.7439  |
| H | -7.4844                 | 0.6403  | 0.8671  | 7.4389                  | -0.5168 | 0.8963  |
| H | -6.4168                 | 2.8630  | 0.5248  | 6.4243                  | -2.7706 | 0.5635  |
| C | -5.6386                 | -0.4277 | 0.6009  | 5.5810                  | 0.5167  | 0.5978  |
| C | -4.2680                 | -0.3410 | 0.3372  | 4.2128                  | 0.4208  | 0.3194  |
| C | -1.5883                 | 2.1824  | -0.4271 | 1.6019                  | -2.2109 | -0.4580 |
| C | -2.2118                 | 0.9934  | -0.1371 | 2.2189                  | -0.9692 | -0.1646 |
| C | -0.1832                 | 2.2891  | -0.5228 | 0.2298                  | -2.3395 | -0.5483 |
| C | -1.4208                 | -0.2006 | -0.1813 | 1.4204                  | 0.2162  | -0.2280 |
| C | 0.6315                  | 1.1469  | -0.3146 | -0.6031                 | -1.1822 | -0.3427 |
| C | -0.0260                 | -0.1355 | -0.4062 | 0.0296                  | 0.1129  | -0.4786 |
| C | 0.4114                  | 3.5473  | -0.8144 | -0.3798                 | -3.6150 | -0.7951 |
| C | 1.7649                  | 3.6679  | -0.8746 | -1.7270                 | -3.7536 | -0.7636 |
| C | 2.5995                  | 2.5960  | -0.4559 | -2.5515                 | -2.6665 | -0.3364 |
| C | 2.0320                  | 1.3681  | -0.0423 | -1.9560                 | -1.4089 | 0.0159  |
| H | -2.1598                 | 3.0996  | -0.5498 | 2.2058                  | -3.1054 | -0.5882 |
| C | -3.6536                 | 0.9093  | 0.1305  | 3.6266                  | -0.8602 | 0.1133  |
| H | -0.2401                 | 4.3939  | -1.0215 | 0.2683                  | -4.4566 | -1.0308 |
| H | 2.2323                  | 4.6058  | -1.1682 | -2.2040                 | -4.7002 | -1.0071 |
| C | 4.0142                  | 2.7808  | -0.4219 | -3.9504                 | -2.8094 | -0.2902 |
| C | 2.8802                  | 0.4564  | 0.7027  | -2.7843                 | -0.4618 | 0.7466  |
| C | 4.2879                  | 0.6571  | 0.6937  | -4.1978                 | -0.6187 | 0.7215  |
| C | 4.8346                  | 1.8195  | 0.0737  | -4.7603                 | -1.7910 | 0.1573  |
| H | 4.4179                  | 3.7125  | -0.8139 | -4.3858                 | -3.7442 | -0.6369 |
| H | 5.9154                  | 1.9480  | 0.0695  | -5.8426                 | -1.9024 | 0.1487  |
| C | -1.3341                 | -2.6322 | -0.1892 | 1.2326                  | 2.6488  | -0.2167 |
| C | -2.0534                 | -1.4788 | -0.0357 | 2.0159                  | 1.5111  | -0.0757 |
| C | 0.0091                  | -2.6029 | -0.6286 | -0.0959                 | 2.5680  | -0.6649 |
| C | 0.6524                  | -1.3486 | -0.8167 | -0.6857                 | 1.2864  | -0.9023 |
| C | 0.6833                  | -3.8036 | -0.9494 | -0.8691                 | 3.7288  | -0.9157 |
| C | 1.9363                  | -3.7764 | -1.5089 | -2.1276                 | 3.6393  | -1.4606 |
| C | 2.5334                  | -2.5359 | -1.7993 | -2.6561                 | 2.3810  | -1.8166 |
| C | 1.9079                  | -1.3569 | -1.4643 | -1.9439                 | 1.2355  | -1.5438 |
| H | -1.8374                 | -3.5856 | -0.0395 | 1.6926                  | 3.6182  | -0.0381 |
| C | -3.4908                 | -1.5934 | 0.2853  | 3.4288                  | 1.6568  | 0.2428  |
| H | 0.1721                  | -4.7472 | -0.7675 | -0.4320                 | 4.6992  | -0.6861 |
| H | 2.4490                  | -4.7011 | -1.7601 | -2.7024                 | 4.5418  | -1.6537 |
| H | 3.4970                  | -2.5055 | -2.3018 | -3.6197                 | 2.3163  | -2.3149 |
| H | 2.3873                  | -0.4153 | -1.7141 | -2.3544                 | 0.2713  | -1.8343 |
| C | 5.1322                  | -0.2607 | 1.3551  | -5.0186                 | 0.3561  | 1.3282  |

|           |         |            |         |         |            |         |
|-----------|---------|------------|---------|---------|------------|---------|
| C         | 2.3782  | -0.5936    | 1.5040  | -2.2521 | 0.5775     | 1.5249  |
| C         | 4.6125  | -1.3163    | 2.0658  | -4.4662 | 1.4209     | 2.0094  |
| C         | 3.2181  | -1.4602    | 2.1655  | -3.0743 | 1.5098     | 2.1364  |
| H         | 6.2078  | -0.0974    | 1.3103  | -6.0987 | 0.2365     | 1.2680  |
| H         | 5.2717  | -2.0142    | 2.5757  | -5.1061 | 2.1651     | 2.4752  |
| H         | 2.7966  | -2.2544    | 2.7769  | -2.6314 | 2.3100     | 2.7233  |
| H         | 1.3045  | -0.7148    | 1.6135  | -1.1760 | 0.6524     | 1.6567  |
| O         | -4.0161 | -2.6845    | 0.4937  | 3.9517  | 2.7725     | 0.4301  |
| C         | -6.4193 | 0.7112     | 0.6638  | 6.3774  | -0.6107    | 0.6808  |
| C         | -5.8190 | 1.9566     | 0.4689  | 5.8080  | -1.8783    | 0.4902  |
| C         | -4.4615 | 2.0532     | 0.2116  | 4.4615  | -1.9966    | 0.2144  |
| H         | -4.0274 | 3.0407     | 0.0846  | 4.0428  | -2.9913    | 0.0898  |
| <b>2A</b> |         |            |         |         |            |         |
|           | E(S0) = | -1496.2203 | A.U.    | E(S1) = | -1496.1281 | A.U.    |
|           | x       | y          | z       | x       | y          | z       |
| H         | -3.3364 | 0.2379     | -1.6633 | -3.3153 | 0.1347     | -1.7520 |
| H         | 7.3523  | 1.5714     | 0.7029  | 7.2869  | 1.6112     | 0.7567  |
| H         | 8.9905  | -0.2860    | 0.7346  | 8.9293  | -0.2350    | 0.8144  |
| H         | 8.2282  | -2.6283    | 0.4012  | 8.1989  | -2.5847    | 0.4580  |
| C         | 7.9347  | -0.4880    | 0.5740  | 7.8791  | -0.4473    | 0.6311  |
| H         | 4.9878  | 2.3426     | 0.4831  | 4.9260  | 2.3805     | 0.4880  |
| C         | 7.0302  | 0.5420     | 0.5564  | 6.9673  | 0.5828     | 0.5994  |
| C         | 6.1729  | -2.1011    | 0.1797  | 6.1423  | -2.0679    | 0.1959  |
| C         | 4.6883  | 1.3076     | 0.3285  | 4.6301  | 1.3450     | 0.3284  |
| C         | 3.3524  | 1.0376     | 0.1186  | 3.2918  | 1.0863     | 0.0961  |
| C         | 0.9996  | -1.8219    | -0.6094 | 1.0100  | -1.8472    | -0.6730 |
| C         | 1.4719  | -0.5676    | -0.3080 | 1.4720  | -0.5470    | -0.3572 |
| C         | -0.3809 | -2.1154    | -0.6476 | -0.3371 | -2.1494    | -0.7097 |
| C         | 0.5277  | 0.5107     | -0.2877 | 0.5243  | 0.5291     | -0.3502 |
| C         | -1.3310 | -1.0987    | -0.3727 | -1.2997 | -1.1189    | -0.4137 |
| C         | -0.8551 | 0.2617     | -0.4562 | -0.8507 | 0.2518     | -0.5391 |
| C         | -0.8144 | -3.4360    | -0.9493 | -0.7842 | -3.4829    | -0.9890 |
| C         | -2.1406 | -3.7375    | -0.9539 | -2.0992 | -3.7940    | -0.9075 |
| C         | -3.0915 | -2.7976    | -0.4697 | -3.0329 | -2.8432    | -0.3872 |
| C         | -2.6757 | -1.5132    | -0.0480 | -2.5963 | -1.5362    | -0.0053 |
| H         | 1.6833  | -2.6493    | -0.7852 | 1.7156  | -2.6501    | -0.8694 |
| C         | 2.9008  | -0.3016    | -0.0899 | 2.8610  | -0.2684    | -0.1274 |
| H         | -0.0656 | -4.1821    | -1.2079 | -0.0438 | -4.2232    | -1.2842 |
| H         | -2.4911 | -4.7235    | -1.2526 | -2.4638 | -4.7842    | -1.1714 |
| C         | -4.4650 | -3.1744    | -0.3787 | -4.3949 | -3.1906    | -0.2672 |
| C         | -3.6041 | -0.7407    | 0.7562  | -3.5038 | -0.7382    | 0.8041  |
| C         | -4.9708 | -1.1307    | 0.8028  | -4.8775 | -1.1018    | 0.8635  |
| C         | -5.3840 | -2.3443    | 0.1776  | -5.3055 | -2.3222    | 0.2783  |
| H         | -4.7565 | -4.1443    | -0.7773 | -4.7133 | -4.1637    | -0.6351 |
| H         | -6.4366 | -2.6189    | 0.2170  | -6.3598 | -2.5865    | 0.3302  |
| C         | 0.1094  | 2.9089     | -0.2254 | 0.0279  | 2.9173     | -0.2600 |

|   |         |         |         |         |         |         |
|---|---------|---------|---------|---------|---------|---------|
| C | 0.9858  | 1.8622  | -0.1358 | 0.9590  | 1.8865  | -0.1854 |
| C | -1.2363 | 2.7055  | -0.6075 | -1.2972 | 2.6762  | -0.6498 |
| C | -1.7091 | 1.3796  | -0.8059 | -1.7341 | 1.3335  | -0.8878 |
| C | -2.0821 | 3.8091  | -0.8643 | -2.2194 | 3.7379  | -0.8443 |
| C | -3.3438 | 3.6224  | -1.3722 | -3.4788 | 3.5018  | -1.3348 |
| C | -3.7768 | 2.3187  | -1.6761 | -3.8665 | 2.1901  | -1.6870 |
| C | -2.9807 | 1.2298  | -1.4026 | -3.0084 | 1.1381  | -1.4669 |
| H | 0.4840  | 3.9190  | -0.0711 | 0.3675  | 3.9340  | -0.0760 |
| C | 2.4070  | 2.1705  | 0.1224  | 2.3511  | 2.2078  | 0.0756  |
| H | -1.6976 | 4.8097  | -0.6757 | -1.8926 | 4.7514  | -0.6170 |
| H | -3.9892 | 4.4730  | -1.5742 | -4.1688 | 4.3286  | -1.4863 |
| C | -5.9001 | -0.3487 | 1.5229  | -5.7892 | -0.2852 | 1.5670  |
| C | -3.2122 | 0.3526  | 1.5617  | -3.0805 | 0.3506  | 1.5864  |
| C | -5.4957 | 0.7544  | 2.2365  | -5.3553 | 0.8259  | 2.2556  |
| C | -4.1302 | 1.0847  | 2.2799  | -3.9849 | 1.1227  | 2.2910  |
| H | -6.9448 | -0.6557 | 1.5201  | -6.8403 | -0.5678 | 1.5737  |
| H | -6.2190 | 1.3467  | 2.7912  | -6.0630 | 1.4476  | 2.7970  |
| H | -3.7923 | 1.9170  | 2.8925  | -3.6262 | 1.9615  | 2.8819  |
| H | -2.1607 | 0.6162  | 1.6284  | -2.0222 | 0.5886  | 1.6468  |
| O | 2.7852  | 3.3219  | 0.3267  | 2.7363  | 3.3819  | 0.2643  |
| C | 5.6524  | 0.2847  | 0.3469  | 5.5982  | 0.3247  | 0.3630  |
| C | 5.2130  | -1.0585 | 0.1528  | 5.1772  | -1.0281 | 0.1544  |
| C | 3.8419  | -1.3137 | -0.0552 | 3.8218  | -1.2873 | -0.0838 |
| H | 3.5453  | -2.3530 | -0.1785 | 3.5301  | -2.3261 | -0.2190 |
| H | 5.8371  | -3.1262 | 0.0330  | 5.8125  | -3.0932 | 0.0380  |
| C | 7.4999  | -1.8213 | 0.3841  | 7.4648  | -1.7842 | 0.4284  |
| H | -4.7478 | 2.1674  | -2.1410 | -4.8377 | 2.0135  | -2.1417 |

| <b>3A</b> |                    |         |         |                    |         |         |
|-----------|--------------------|---------|---------|--------------------|---------|---------|
|           | E(S0) = -1342.6902 |         |         | E(S1) = -1342.5953 |         |         |
|           | x                  | y       | z       | x                  | y       | z       |
| H         | 6.0611             | -1.6429 | -0.4062 | 6.0404             | -1.6740 | -0.3931 |
| H         | 7.5827             | 0.2424  | 0.2203  | 7.5629             | 0.2424  | 0.1022  |
| H         | 6.5869             | 2.4335  | 0.8572  | 6.5884             | 2.4681  | 0.6584  |
| C         | 5.6675             | -0.6704 | -0.1222 | 5.6440             | -0.6935 | -0.1422 |
| C         | 4.2784             | -0.5065 | -0.1146 | 4.2557             | -0.5492 | -0.1035 |
| C         | 1.6392             | 2.0948  | 0.5258  | 1.6482             | 2.1098  | 0.5684  |
| C         | 2.2423             | 0.8974  | 0.2268  | 2.2578             | 0.8759  | 0.2392  |
| C         | 0.2535             | 2.2993  | 0.3416  | 0.2929             | 2.3060  | 0.4049  |
| C         | 1.4015             | -0.2248 | -0.0650 | 1.4155             | -0.2598 | -0.0241 |
| C         | -0.5694            | 1.2357  | -0.0862 | -0.5315            | 1.2159  | -0.0685 |
| C         | -0.0136            | -0.0950 | -0.0372 | -0.0012            | -0.1192 | 0.0230  |
| C         | -0.3011            | 3.5996  | 0.5512  | -0.3054            | 3.5867  | 0.6532  |
| C         | -1.6031            | 3.8544  | 0.2678  | -1.5914            | 3.8254  | 0.3133  |
| C         | -2.4081            | 2.8638  | -0.3713 | -2.3555            | 2.8375  | -0.4006 |
| C         | -1.8744            | 1.5694  | -0.6196 | -1.7945            | 1.5509  | -0.6570 |
| H         | 2.2258             | 2.9558  | 0.8372  | 2.2457             | 2.9474  | 0.9166  |

|           |         |            |         |         |            |         |
|-----------|---------|------------|---------|---------|------------|---------|
| C         | 3.7022  | 0.7292     | 0.2400  | 3.6869  | 0.7149     | 0.2194  |
| H         | 0.3480  | 4.3762     | 0.9515  | 0.3115  | 4.3595     | 1.1066  |
| H         | -2.0365 | 4.8347     | 0.4566  | -2.0535 | 4.7908     | 0.5085  |
| C         | -3.7099 | 3.1810     | -0.8148 | -3.6391 | 3.1356     | -0.8678 |
| C         | -2.6292 | 0.6962     | -1.4351 | -2.5191 | 0.6692     | -1.4971 |
| C         | -3.8852 | 1.0370     | -1.8827 | -3.7724 | 0.9966     | -1.9721 |
| C         | -4.4496 | 2.2786     | -1.5423 | -4.3535 | 2.2231     | -1.6323 |
| H         | -4.1066 | 4.1694     | -0.5886 | -4.0678 | 4.1079     | -0.6330 |
| H         | -5.4492 | 2.5355     | -1.8833 | -5.3488 | 2.4742     | -1.9888 |
| C         | 1.1720  | -2.5667    | -0.6469 | 1.1378  | -2.6162    | -0.5766 |
| C         | 1.9800  | -1.4891    | -0.3828 | 1.9813  | -1.5301    | -0.3190 |
| C         | -0.2154 | -2.5108    | -0.4111 | -0.2327 | -2.5302    | -0.3523 |
| C         | -0.7974 | -1.3044    | 0.0448  | -0.8090 | -1.3006    | 0.1089  |
| C         | -1.0175 | -3.6807    | -0.5893 | -1.0864 | -3.6566    | -0.5786 |
| C         | -2.3316 | -3.6784    | -0.2550 | -2.4064 | -3.6089    | -0.2700 |
| C         | -2.9019 | -2.5515    | 0.4120  | -2.9645 | -2.4736    | 0.4033  |
| C         | -2.1184 | -1.3859    | 0.6356  | -2.1444 | -1.3404    | 0.6656  |
| H         | 1.6303  | -3.5007    | -0.9664 | 1.5823  | -3.5512    | -0.9091 |
| C         | 3.4416  | -1.6631    | -0.4832 | 3.4213  | -1.7187    | -0.4018 |
| H         | -0.5442 | -4.5664    | -1.0083 | -0.6452 | -4.5530    | -1.0106 |
| H         | -2.9549 | -4.5550    | -0.4205 | -3.0544 | -4.4616    | -0.4656 |
| C         | -4.2208 | -2.6128    | 0.9094  | -4.2950 | -2.4970    | 0.8578  |
| C         | -2.6533 | -0.3899    | 1.4834  | -2.6762 | -0.3341    | 1.5006  |
| C         | -3.9313 | -0.4844    | 1.9850  | -3.9775 | -0.3869    | 1.9568  |
| C         | -4.7396 | -1.5893    | 1.6674  | -4.8099 | -1.4604    | 1.6101  |
| H         | -4.8111 | -3.5035    | 0.7011  | -4.9081 | -3.3649    | 0.6195  |
| H         | -5.7552 | -1.6501    | 2.0500  | -5.8397 | -1.4901    | 1.9564  |
| H         | -4.3119 | 0.2965     | 2.6385  | -4.3536 | 0.4080     | 2.5964  |
| H         | -2.0404 | 0.4644     | 1.7557  | -2.0458 | 0.5001     | 1.7995  |
| O         | 3.9376  | -2.7281    | -0.8461 | 3.9247  | -2.8196    | -0.6929 |
| C         | 6.5041  | 0.3737     | 0.2246  | 6.4844  | 0.3741     | 0.1322  |
| C         | 5.9436  | 1.6016     | 0.5817  | 5.9376  | 1.6241     | 0.4468  |
| C         | 4.5696  | 1.7760     | 0.5867  | 4.5671  | 1.7892     | 0.4862  |
| H         | 4.1738  | 2.7481     | 0.8656  | 4.1720  | 2.7733     | 0.7197  |
| H         | -4.4379 | 0.3440     | -2.5122 | -4.3036 | 0.3010     | -2.6159 |
| H         | -2.2067 | -0.2609    | -1.7271 | -2.0714 | -0.2788    | -1.7815 |
| <b>4A</b> |         |            |         |         |            |         |
|           | E(S0) = | -1496.2184 | A.U.    | E(S1) = | -1496.1271 | A.U.    |
|           | x       | y          | z       | x       | y          | z       |
| H         | 1.3935  | -3.7936    | 2.9478  | 1.1322  | -3.7599    | 2.9594  |
| C         | 1.6591  | -2.8502    | 2.4774  | 1.4409  | -2.8260    | 2.4970  |
| C         | 0.7458  | -1.7814    | 2.4734  | 0.5487  | -1.7413    | 2.4387  |
| H         | -6.0748 | -1.8172    | 0.2874  | -6.0119 | -1.8124    | 0.3090  |
| H         | -7.6828 | 0.0373     | 0.7723  | -7.5937 | 0.0413     | 0.8561  |
| H         | -6.8379 | 2.3784     | 0.8381  | -6.7450 | 2.3855     | 0.9283  |
| C         | -5.7481 | -0.7812    | 0.3196  | -5.6765 | -0.7789    | 0.3436  |

|   |         |         |         |         |         |         |
|---|---------|---------|---------|---------|---------|---------|
| C | -4.3957 | -0.5168 | 0.0788  | -4.3260 | -0.5308 | 0.0676  |
| C | -1.9702 | 2.3473  | -0.1589 | -1.9240 | 2.3886  | -0.2464 |
| C | -2.4820 | 1.0725  | -0.1332 | -2.4433 | 1.0694  | -0.1775 |
| C | -0.5803 | 2.5957  | -0.2295 | -0.5683 | 2.6391  | -0.3305 |
| C | -1.5903 | -0.0129 | -0.4216 | -1.5672 | -0.0191 | -0.4672 |
| C | 0.3272  | 1.5107  | -0.2809 | 0.3522  | 1.5280  | -0.3427 |
| C | -0.2154 | 0.2251  | -0.6420 | -0.1929 | 0.2270  | -0.7071 |
| C | -0.0925 | 3.9331  | -0.2422 | -0.0527 | 3.9778  | -0.3305 |
| C | 1.2448  | 4.1713  | -0.3179 | 1.2824  | 4.1987  | -0.2848 |
| C | 2.1773  | 3.1047  | -0.1806 | 2.1935  | 3.1095  | -0.0988 |
| C | 1.7151  | 1.7792  | 0.0229  | 1.6867  | 1.7716  | 0.0501  |
| H | -2.6203 | 3.2149  | -0.0755 | -2.5938 | 3.2435  | -0.2006 |
| C | -3.9060 | 0.8039  | 0.1075  | -3.8327 | 0.8042  | 0.0939  |
| H | -0.8119 | 4.7495  | -0.2441 | -0.7601 | 4.8024  | -0.3912 |
| H | 1.6294  | 5.1834  | -0.4275 | 1.6912  | 5.2045  | -0.3537 |
| C | 3.5732  | 3.3640  | -0.2478 | 3.5764  | 3.3108  | -0.1500 |
| C | 2.6643  | 0.8006  | 0.4969  | 2.6143  | 0.7550  | 0.5347  |
| C | 4.0367  | 1.0515  | 0.2792  | 4.0021  | 0.9690  | 0.3276  |
| C | 4.4695  | 2.3465  | -0.1187 | 4.4598  | 2.2486  | -0.0353 |
| H | 3.9029  | 4.3810  | -0.4507 | 3.9505  | 4.3154  | -0.3365 |
| H | 5.5356  | 2.5191  | -0.2536 | 5.5289  | 2.4082  | -0.1587 |
| C | -1.2631 | -2.3878 | -0.8376 | -1.2178 | -2.3896 | -0.9247 |
| C | -2.0932 | -1.3525 | -0.4999 | -2.0661 | -1.3618 | -0.5543 |
| C | 0.0627  | -2.1520 | -1.2676 | 0.0962  | -2.1320 | -1.3518 |
| C | 0.5704  | -0.8241 | -1.2548 | 0.5947  | -0.7904 | -1.3289 |
| C | 0.8498  | -3.2086 | -1.7816 | 0.9345  | -3.1684 | -1.8260 |
| C | 2.0771  | -2.9588 | -2.3438 | 2.1823  | -2.8949 | -2.3342 |
| C | 2.5314  | -1.6305 | -2.4438 | 2.6267  | -1.5596 | -2.4250 |
| C | 1.7970  | -0.5924 | -1.9168 | 1.8502  | -0.5349 | -1.9369 |
| H | -1.6652 | -3.3992 | -0.8458 | -1.6070 | -3.4056 | -0.9349 |
| C | -3.5062 | -1.6591 | -0.2029 | -3.4620 | -1.6693 | -0.2517 |
| H | 0.4442  | -4.2182 | -1.7495 | 0.5584  | -4.1898 | -1.7986 |
| H | 2.6757  | -3.7719 | -2.7456 | 2.8109  | -3.7016 | -2.7027 |
| H | 3.4700  | -1.4176 | -2.9499 | 3.5807  | -1.3369 | -2.8963 |
| H | 2.1622  | 0.4239  | -2.0294 | 2.1883  | 0.4911  | -2.0538 |
| C | 4.9928  | 0.0074  | 0.4636  | 4.9256  | -0.1009 | 0.5400  |
| C | 2.3062  | -0.4117 | 1.2031  | 2.2078  | -0.4141 | 1.2481  |
| C | 4.6111  | -1.2229 | 0.8950  | 4.5005  | -1.3030 | 1.0076  |
| C | 3.2694  | -1.4506 | 1.3231  | 3.1452  | -1.4814 | 1.4161  |
| H | 6.0340  | 0.2180  | 0.2257  | 5.9749  | 0.0721  | 0.3093  |
| H | 5.3331  | -2.0319 | 0.9915  | 5.1946  | -2.1311 | 1.1365  |
| C | 2.9072  | -2.6739 | 1.9280  | 2.7239  | -2.6846 | 2.0103  |
| C | 1.0651  | -0.5939 | 1.8542  | 0.9225  | -0.5652 | 1.8322  |
| O | -3.9249 | -2.8153 | -0.1966 | -3.8972 | -2.8349 | -0.2785 |
| C | -6.6327 | 0.2463  | 0.5877  | -6.5478 | 0.2501  | 0.6456  |
| C | -6.1571 | 1.5587  | 0.6225  | -6.0709 | 1.5688  | 0.6827  |

|           |         |            |         |         |            |         |
|-----------|---------|------------|---------|---------|------------|---------|
| C         | -4.8190 | 1.8309     | 0.3908  | -4.7444 | 1.8365     | 0.4144  |
| H         | -4.4851 | 2.8632     | 0.4410  | -4.4020 | 2.8659     | 0.4699  |
| H         | 0.3534  | 0.2261     | 1.8854  | 0.2354  | 0.2756     | 1.8310  |
| H         | 3.6523  | -3.4665    | 1.9778  | 3.4410  | -3.4987    | 2.0988  |
| H         | -0.2168 | -1.8875    | 2.9682  | -0.4406 | -1.8283    | 2.8809  |
| <b>5A</b> |         |            |         |         |            |         |
|           | E(S0) = | -1496.2166 | A.U.    | E(S1) = | -1496.1261 | A.U.    |
|           | x       | y          | z       | x       | y          | z       |
| H         | -6.3756 | -1.8098    | 0.4393  | -6.3358 | -1.8262    | 0.4414  |
| H         | -7.9873 | 0.0964     | 0.2582  | -7.9393 | 0.0881     | 0.3353  |
| H         | -7.0999 | 2.3936     | -0.1082 | -7.0614 | 2.3961     | -0.0064 |
| C         | -6.0308 | -0.7925    | 0.2739  | -5.9881 | -0.8080    | 0.2869  |
| C         | -4.6527 | -0.5827    | 0.1631  | -4.6098 | -0.6147    | 0.1481  |
| C         | -2.1399 | 2.1618     | -0.3882 | -2.1222 | 2.1809     | -0.4424 |
| C         | -2.6879 | 0.9239     | -0.1569 | -2.6755 | 0.9029     | -0.1882 |
| C         | -0.7456 | 2.3891     | -0.3208 | -0.7592 | 2.4046     | -0.3792 |
| C         | -1.7990 | -0.1988    | -0.0841 | -1.7982 | -0.2214    | -0.1289 |
| C         | 0.1324  | 1.3161     | -0.0347 | 0.1201  | 1.3101     | -0.0683 |
| C         | -0.3981 | -0.0185    | -0.2076 | -0.3943 | -0.0299    | -0.2730 |
| C         | -0.2244 | 3.6967     | -0.5293 | -0.2095 | 3.7138     | -0.5839 |
| C         | 1.1152  | 3.9205     | -0.4458 | 1.1178  | 3.9364     | -0.4248 |
| C         | 1.9876  | 2.9042     | 0.0347  | 1.9632  | 2.9073     | 0.0969  |
| C         | 1.4743  | 1.6350     | 0.3833  | 1.4143  | 1.6236     | 0.4180  |
| H         | -2.7701 | 3.0287     | -0.5733 | -2.7678 | 3.0283     | -0.6581 |
| C         | -4.1376 | 0.7113     | -0.0502 | -4.0991 | 0.6952     | -0.0573 |
| H         | -0.9142 | 4.4955     | -0.7946 | -0.8812 | 4.5107     | -0.8967 |
| H         | 1.5359  | 4.8962     | -0.6816 | 1.5581  | 4.9072     | -0.6407 |
| C         | 3.3835  | 3.1703     | 0.1636  | 3.3447  | 3.1290     | 0.2486  |
| C         | 2.3268  | 0.7506     | 1.1506  | 2.2353  | 0.7220     | 1.2061  |
| C         | 3.7210  | 1.0199     | 1.2122  | 3.6342  | 0.9614     | 1.2982  |
| C         | 4.2312  | 2.2326     | 0.6615  | 4.1729  | 2.1597     | 0.7669  |
| H         | 3.7542  | 4.1374     | -0.1715 | 3.7540  | 4.0833     | -0.0761 |
| H         | 5.3023  | 2.4191     | 0.7167  | 5.2448  | 2.3319     | 0.8409  |
| C         | -1.4633 | -2.5869    | 0.1573  | -1.4201 | -2.6132    | 0.0788  |
| C         | -2.3184 | -1.5151    | 0.0999  | -2.3112 | -1.5446    | 0.0404  |
| C         | -0.0975 | -2.4488    | -0.1612 | -0.0715 | -2.4469    | -0.2456 |
| C         | 0.4112  | -1.1747    | -0.5032 | 0.4316  | -1.1542    | -0.5925 |
| C         | 0.7607  | -3.5917    | -0.1552 | 0.8298  | -3.5524    | -0.1950 |
| C         | 2.0608  | -3.4844    | -0.5273 | 2.1356  | -3.4131    | -0.5493 |
| C         | 2.5526  | -2.2633    | -1.0811 | 2.6170  | -2.1900    | -1.1113 |
| C         | 1.7048  | -1.1243    | -1.1505 | 1.7438  | -1.0671    | -1.1989 |
| H         | -1.8712 | -3.5702    | 0.3835  | -1.8059 | -3.6013    | 0.3203  |
| C         | -3.7627 | -1.7538    | 0.2795  | -3.7310 | -1.7900    | 0.2219  |
| H         | 0.3454  | -4.5420    | 0.1743  | 0.4463  | -4.5102    | 0.1525  |
| H         | 2.7297  | -4.3418    | -0.4833 | 2.8224  | -4.2550    | -0.4794 |
| C         | 3.8520  | -2.1992    | -1.6270 | 3.9233  | -2.1084    | -1.6296 |



|   |         |         |         |         |         |         |
|---|---------|---------|---------|---------|---------|---------|
| C | 2.1457  | -0.0235 | -1.9187 | 2.1974  | 0.0465  | -1.9392 |
| C | 3.4035  | 0.0025  | -2.4773 | 3.4732  | 0.0947  | -2.4642 |
| C | 4.2831  | -1.0788 | -2.2982 | 4.3608  | -0.9757 | -2.2832 |
| H | 4.4961  | -3.0720 | -1.5336 | 4.5758  | -2.9741 | -1.5243 |
| H | 5.2833  | -1.0442 | -2.7226 | 5.3704  | -0.9250 | -2.6826 |
| H | 3.7123  | 0.8624  | -3.0666 | 3.7860  | 0.9709  | -3.0277 |
| H | 1.4731  | 0.8119  | -2.0901 | 1.5240  | 0.8811  | -2.1164 |
| C | 4.5787  | 0.1202  | 1.8814  | 4.4567  | 0.0440  | 1.9857  |
| C | 1.8370  | -0.3340 | 1.9119  | 1.7006  | -0.3447 | 1.9455  |
| C | 4.0776  | -0.9747 | 2.5453  | 3.9120  | -1.0455 | 2.6341  |
| C | 2.6875  | -1.1773 | 2.5908  | 2.5226  | -1.2189 | 2.6398  |
| H | 5.6468  | 0.3320  | 1.8873  | 5.5288  | 0.2288  | 2.0163  |
| H | 4.7462  | -1.6563 | 3.0649  | 4.5521  | -1.7433 | 3.1665  |
| H | 2.2771  | -2.0010 | 3.1702  | 2.0788  | -2.0385 | 3.1989  |
| H | 0.7655  | -0.4971 | 1.9818  | 0.6233  | -0.4784 | 1.9935  |
| O | -4.2040 | -2.8776 | 0.5095  | -4.1878 | -2.9312 | 0.4198  |
| C | -6.9169 | 0.2636  | 0.1740  | -6.8705 | 0.2555  | 0.2282  |
| C | -6.4173 | 1.5507  | -0.0331 | -6.3776 | 1.5520  | 0.0337  |
| C | -5.0539 | 1.7699  | -0.1393 | -5.0200 | 1.7645  | -0.1031 |
| H | -4.7033 | 2.7872  | -0.2878 | -4.6663 | 2.7830  | -0.2362 |

| <b>6A</b> |                         |         |         |                         |         |         |
|-----------|-------------------------|---------|---------|-------------------------|---------|---------|
|           | E(S0) = -1649.7464 A.U. |         |         | E(S1) = -1649.6576 A.U. |         |         |
|           | x                       | y       | z       | x                       | y       | z       |
| H         | -7.7759                 | -1.8096 | 0.4157  | -7.7336                 | -1.8045 | 0.4623  |
| H         | -9.5031                 | -0.0430 | 0.2415  | -9.4463                 | -0.0224 | 0.3802  |
| H         | -8.8354                 | 2.3232  | -0.1245 | -8.7800                 | 2.3485  | 0.0417  |
| C         | -8.4492                 | 0.2097  | 0.1584  | -8.3945                 | 0.2274  | 0.2668  |
| H         | -5.3633                 | -2.4618 | 0.4087  | -5.3289                 | -2.4843 | 0.3681  |
| C         | -7.4954                 | -0.7702 | 0.2550  | -7.4446                 | -0.7659 | 0.3129  |
| C         | -6.7450                 | 1.8994  | -0.1577 | -6.6928                 | 1.9083  | -0.0701 |
| C         | -5.1067                 | -1.4169 | 0.2438  | -5.0659                 | -1.4391 | 0.2141  |
| C         | -3.7737                 | -1.0828 | 0.1339  | -3.7286                 | -1.1282 | 0.0715  |
| C         | -1.5042                 | 1.8877  | -0.4038 | -1.5008                 | 1.8872  | -0.5290 |
| C         | -1.9454                 | 0.6064  | -0.1806 | -1.9351                 | 0.5667  | -0.2652 |
| C         | -0.1365                 | 2.2356  | -0.3231 | -0.1659                 | 2.2353  | -0.4502 |
| C         | -0.9628                 | -0.4358 | -0.1070 | -0.9583                 | -0.4751 | -0.1933 |
| C         | 0.8299                  | 1.2420  | -0.0357 | 0.8040                  | 1.2283  | -0.1076 |
| C         | 0.4182                  | -0.1319 | -0.2208 | 0.4219                  | -0.1556 | -0.3192 |
| C         | 0.2690                  | 3.5855  | -0.5212 | 0.2591                  | 3.5881  | -0.6603 |
| C         | 1.5824                  | 3.9261  | -0.4241 | 1.5548                  | 3.9338  | -0.4723 |
| C         | 2.5368                  | 2.9877  | 0.0593  | 2.4784                  | 2.9935  | 0.0856  |
| C         | 2.1360                  | 1.6754  | 0.3948  | 2.0534                  | 1.6679  | 0.4061  |
| H         | -2.2064                 | 2.6971  | -0.5902 | -2.2180                 | 2.6683  | -0.7674 |
| C         | -3.3736                 | 0.2723  | -0.0795 | -3.3318                 | 0.2371  | -0.1359 |
| H         | -0.4866                 | 4.3213  | -0.7893 | -0.4795                 | 4.3150  | -0.9919 |
| H         | 1.9174                  | 4.9365  | -0.6504 | 1.9084                  | 4.9401  | -0.6851 |

|           |         |            |         |         |            |         |
|-----------|---------|------------|---------|---------|------------|---------|
| C         | 3.9012  | 3.3782     | 0.2048  | 3.8256  | 3.3629     | 0.2784  |
| C         | 3.0583  | 0.8656     | 1.1636  | 2.9436  | 0.8549     | 1.2153  |
| C         | 4.4216  | 1.2602     | 1.2429  | 4.3058  | 1.2423     | 1.3487  |
| C         | 4.8255  | 2.5187     | 0.7070  | 4.7317  | 2.4910     | 0.8281  |
| H         | 4.1856  | 4.3773     | -0.1205 | 4.1400  | 4.3538     | -0.0429 |
| H         | 5.8745  | 2.8015     | 0.7755  | 5.7774  | 2.7735     | 0.9331  |
| C         | -0.4143 | -2.7871    | 0.1230  | -0.3662 | -2.8227    | 0.0358  |
| C         | -1.3615 | -1.7958    | 0.0694  | -1.3529 | -1.8398    | -0.0241 |
| C         | 0.9352  | -2.5259    | -0.1897 | 0.9652  | -2.5345    | -0.2645 |
| C         | 1.3287  | -1.2093    | -0.5204 | 1.3550  | -1.2017    | -0.6097 |
| C         | 1.8926  | -3.5867    | -0.1864 | 1.9643  | -3.5546    | -0.1914 |
| C         | 3.1804  | -3.3595    | -0.5481 | 3.2575  | -3.2966    | -0.5143 |
| C         | 3.5637  | -2.0950    | -1.0897 | 3.6389  | -2.0322    | -1.0674 |
| C         | 2.6161  | -1.0370    | -1.1583 | 2.6670  | -0.9982    | -1.1865 |
| H         | -0.7333 | -3.8043    | 0.3421  | -0.6640 | -3.8400    | 0.2798  |
| C         | -2.7781 | -2.1672    | 0.2474  | -2.7436 | -2.2164    | 0.1399  |
| H         | 1.5628  | -4.5731    | 0.1340  | 1.6607  | -4.5431    | 0.1493  |
| H         | 3.9239  | -4.1532    | -0.5045 | 4.0181  | -4.0708    | -0.4252 |
| C         | 4.8567  | -1.9086    | -1.6223 | 4.9460  | -1.8277    | -1.5457 |
| C         | 2.9621  | 0.1053     | -1.9146 | 3.0330  | 0.1491     | -1.9236 |
| C         | 4.2172  | 0.2499     | -2.4606 | 4.3138  | 0.3183     | -2.4101 |
| C         | 5.1903  | -0.7479    | -2.2802 | 5.2942  | -0.6599    | -2.1929 |
| H         | 5.5768  | -2.7198    | -1.5288 | 5.6748  | -2.6266    | -1.4154 |
| H         | 6.1872  | -0.6186    | -2.6938 | 6.3066  | -0.5141    | -2.5608 |
| H         | 4.4520  | 1.1395     | -3.0400 | 4.5579  | 1.2178     | -2.9711 |
| H         | 2.2184  | 0.8780     | -2.0863 | 2.2876  | 0.9139     | -2.1267 |
| C         | 5.3509  | 0.4357     | 1.9135  | 5.2030  | 0.4177     | 2.0607  |
| C         | 2.6624  | -0.2676    | 1.9091  | 2.5078  | -0.2679    | 1.9402  |
| C         | 4.9457  | -0.7078    | 2.5602  | 4.7614  | -0.7231    | 2.6942  |
| C         | 3.5797  | -1.0375    | 2.5880  | 3.3972  | -1.0455    | 2.6596  |
| H         | 6.3951  | 0.7440     | 1.9331  | 6.2471  | 0.7191     | 2.1228  |
| H         | 5.6688  | -1.3313    | 3.0800  | 5.4568  | -1.3493    | 3.2464  |
| H         | 3.2407  | -1.9017    | 3.1544  | 3.0294  | -1.9097    | 3.2071  |
| H         | 1.6096  | -0.5281    | 1.9665  | 1.4516  | -0.5224    | 1.9524  |
| O         | -3.1129 | -3.3272    | 0.4748  | -3.0970 | -3.3974    | 0.3232  |
| C         | -6.1198 | -0.4472    | 0.1474  | -6.0731 | -0.4567    | 0.1677  |
| C         | -5.7342 | 0.9100     | -0.0633 | -5.6886 | 0.9069     | -0.0295 |
| C         | -4.3653 | 1.2315     | -0.1666 | -4.3285 | 1.2163     | -0.1739 |
| H         | -4.1144 | 2.2798     | -0.3132 | -4.0686 | 2.2644     | -0.3024 |
| H         | -6.4507 | 2.9352     | -0.3178 | -6.3924 | 2.9442     | -0.2185 |
| C         | -8.0683 | 1.5564     | -0.0500 | -8.0163 | 1.5760     | 0.0742  |
| <b>7A</b> |         |            |         |         |            |         |
|           | E(S0) = | -1803.2723 | A.U.    | E(S1) = | -1803.1868 | A.U.    |
|           | x       | y          | z       | x       | y          | z       |
| H         | 0.0495  | -2.0237    | 1.6863  | 0.0751  | -2.0569    | 1.7127  |
| H         | 0.9739  | -4.2619    | 1.9695  | 0.9871  | -4.3213    | 1.8819  |

|   |         |         |         |         |         |         |
|---|---------|---------|---------|---------|---------|---------|
| H | 4.9437  | -2.6315 | 2.1329  | 4.9792  | -2.7342 | 1.9622  |
| H | -0.0495 | 5.0961  | -2.0613 | -0.3735 | 5.1032  | -1.9275 |
| C | 0.3564  | 4.0934  | -1.9528 | 0.0875  | 4.1220  | -1.8484 |
| C | -0.4674 | 2.9722  | -2.1511 | -0.6848 | 2.9630  | -2.0407 |
| H | -6.7252 | 1.3142  | 0.9963  | -6.6951 | 1.2228  | 1.0093  |
| H | -8.2827 | -0.4518 | 0.1478  | -8.2179 | -0.5187 | 0.0614  |
| H | -7.3276 | -2.4956 | -0.9055 | -7.2308 | -2.5205 | -1.0497 |
| C | -6.3500 | 0.4050  | 0.5338  | -6.3016 | 0.3338  | 0.5225  |
| C | -4.9636 | 0.2537  | 0.4295  | -4.9089 | 0.2045  | 0.4517  |
| C | -2.3638 | -2.1507 | -0.8455 | -2.2716 | -2.2133 | -0.8225 |
| C | -2.9536 | -1.0464 | -0.2795 | -2.8972 | -1.0719 | -0.2604 |
| C | -0.9720 | -2.2107 | -1.1002 | -0.9076 | -2.2592 | -1.0673 |
| C | -2.0969 | -0.0334 | 0.2687  | -2.0780 | -0.0562 | 0.3038  |
| C | -0.1488 | -1.1198 | -0.7441 | -0.1020 | -1.1218 | -0.7226 |
| C | -0.6919 | -0.1711 | 0.1975  | -0.6628 | -0.1897 | 0.2452  |
| C | -0.3943 | -3.3657 | -1.7006 | -0.2825 | -3.3851 | -1.6964 |
| C | 0.9506  | -3.4284 | -1.9000 | 1.0428  | -3.3598 | -1.9839 |
| C | 1.7667  | -2.2772 | -1.7080 | 1.8086  | -2.1638 | -1.8024 |
| C | 1.1787  | -1.0536 | -1.3025 | 1.1636  | -0.9724 | -1.3332 |
| H | -2.9603 | -2.9990 | -1.1736 | -2.8670 | -3.0740 | -1.1179 |
| C | -4.4102 | -0.8996 | -0.1626 | -4.3354 | -0.9365 | -0.1713 |
| H | -1.0401 | -4.2094 | -1.9362 | -0.8880 | -4.2657 | -1.9029 |
| H | 1.4220  | -4.3411 | -2.2595 | 1.5480  | -4.2360 | -2.3856 |
| C | 3.1714  | -2.3508 | -1.9085 | 3.1990  | -2.1590 | -1.9813 |
| C | 1.9528  | 0.1537  | -1.4565 | 1.8922  | 0.2807  | -1.4507 |
| C | 3.3571  | 0.0300  | -1.5380 | 3.3060  | 0.2213  | -1.5294 |
| C | 3.9504  | -1.2485 | -1.7267 | 3.9424  | -1.0164 | -1.7502 |
| H | 3.6098  | -3.3140 | -2.1633 | 3.6923  | -3.0904 | -2.2531 |
| H | 5.0350  | -1.3114 | -1.7972 | 5.0285  | -1.0424 | -1.8165 |
| C | -1.8173 | 2.1080  | 1.3659  | -1.7950 | 2.0394  | 1.5047  |
| C | -2.6512 | 1.1286  | 0.8860  | -2.6424 | 1.0794  | 0.9685  |
| C | -0.4248 | 1.9045  | 1.4585  | -0.4136 | 1.8248  | 1.5840  |
| C | 0.1245  | 0.6641  | 1.0456  | 0.1414  | 0.5888  | 1.1180  |
| C | 0.4262  | 2.9290  | 1.9610  | 0.4734  | 2.8402  | 2.0278  |
| C | 1.7651  | 2.7137  | 2.0613  | 1.8270  | 2.6330  | 2.0474  |
| C | 2.3006  | 1.4090  | 1.8671  | 2.3711  | 1.3402  | 1.8188  |
| C | 1.4577  | 0.3405  | 1.4875  | 1.5062  | 0.2719  | 1.4766  |
| H | -2.2540 | 3.0346  | 1.7340  | -2.2284 | 2.9613  | 1.8876  |
| C | -4.1085 | 1.3381  | 0.9521  | -4.0852 | 1.2716  | 1.0353  |
| H | -0.0151 | 3.8898  | 2.2177  | 0.0563  | 3.8074  | 2.3025  |
| H | 2.4407  | 3.5106  | 2.3667  | 2.5055  | 3.4388  | 2.3217  |
| C | 3.6904  | 1.1778  | 2.0902  | 3.7661  | 1.1016  | 1.9851  |
| C | 1.9622  | -1.0088 | 1.6532  | 2.0025  | -1.0703 | 1.6270  |
| C | 3.3551  | -1.2034 | 1.8637  | 3.4037  | -1.2791 | 1.7800  |
| C | 4.2116  | -0.0742 | 2.0219  | 4.2755  | -0.1574 | 1.9048  |
| H | 4.3241  | 2.0367  | 2.3046  | 4.4138  | 1.9568  | 2.1703  |

|   |         |         |         |         |         |         |
|---|---------|---------|---------|---------|---------|---------|
| H | 5.2776  | -0.2452 | 2.1631  | 5.3445  | -0.3368 | 2.0041  |
| C | 3.8696  | -2.5108 | 1.9990  | 3.9033  | -2.5940 | 1.8694  |
| C | 1.1277  | -2.1469 | 1.7332  | 1.1523  | -2.2004 | 1.7013  |
| C | 4.1836  | 1.1914  | -1.4667 | 4.0754  | 1.4217  | -1.4386 |
| C | 1.3824  | 1.4758  | -1.6273 | 1.2585  | 1.5602  | -1.6051 |
| C | 3.6414  | 2.4341  | -1.3974 | 3.4697  | 2.6352  | -1.3728 |
| C | 2.2328  | 2.6124  | -1.5364 | 2.0537  | 2.7433  | -1.5083 |
| H | 5.2633  | 1.0509  | -1.4558 | 5.1604  | 1.3346  | -1.4199 |
| H | 4.2724  | 3.3173  | -1.3126 | 4.0540  | 3.5490  | -1.2808 |
| C | 1.6883  | 3.9084  | -1.6659 | 1.4373  | 4.0066  | -1.6024 |
| C | 0.0351  | 1.7001  | -1.9935 | -0.1135 | 1.7174  | -1.9249 |
| O | -4.5902 | 2.3660  | 1.4241  | -4.5930 | 2.2740  | 1.5667  |
| C | -7.2061 | -0.5728 | 0.0631  | -7.1386 | -0.6312 | -0.0033 |
| C | -6.6684 | -1.7185 | -0.5264 | -6.5832 | -1.7572 | -0.6252 |
| C | -5.2973 | -1.8766 | -0.6391 | -5.2125 | -1.9028 | -0.7079 |
| H | -4.9174 | -2.7775 | -1.1123 | -4.8136 | -2.7795 | -1.2105 |
| H | -0.6154 | 0.8504  | -2.1808 | -0.7196 | 0.8371  | -2.1166 |
| H | 2.3573  | 4.7618  | -1.5643 | 2.0594  | 4.8943  | -1.4999 |
| C | 3.0353  | -3.6036 | 2.0066  | 3.0534  | -3.6776 | 1.8721  |
| H | 3.4409  | -4.6052 | 2.1252  | 3.4523  | -4.6855 | 1.9543  |
| H | -1.5077 | 3.1058  | -2.4386 | -1.7394 | 3.0487  | -2.2911 |
| C | 1.6472  | -3.4103 | 1.9049  | 1.6639  | -3.4729 | 1.8170  |

| <b>8A</b> |                    |         |         |                    |         |         |
|-----------|--------------------|---------|---------|--------------------|---------|---------|
|           | E(S0) = -1803.2723 |         |         | E(S1) = -1803.1868 |         |         |
|           | x                  | y       | z       | x                  | y       | z       |
| H         | 0.0495             | -2.0237 | 1.6863  | 0.0751             | -2.0569 | 1.7127  |
| H         | 0.9739             | -4.2619 | 1.9695  | 0.9871             | -4.3213 | 1.8819  |
| H         | 4.9437             | -2.6315 | 2.1329  | 4.9792             | -2.7342 | 1.9622  |
| H         | -0.0495            | 5.0961  | -2.0613 | -0.3735            | 5.1032  | -1.9275 |
| C         | 0.3564             | 4.0934  | -1.9528 | 0.0875             | 4.1220  | -1.8484 |
| C         | -0.4674            | 2.9722  | -2.1511 | -0.6848            | 2.9630  | -2.0407 |
| H         | -6.7252            | 1.3142  | 0.9963  | -6.6951            | 1.2228  | 1.0093  |
| H         | -8.2827            | -0.4518 | 0.1478  | -8.2179            | -0.5187 | 0.0614  |
| H         | -7.3276            | -2.4956 | -0.9055 | -7.2308            | -2.5205 | -1.0497 |
| C         | -6.3500            | 0.4050  | 0.5338  | -6.3016            | 0.3338  | 0.5225  |
| C         | -4.9636            | 0.2537  | 0.4295  | -4.9089            | 0.2045  | 0.4517  |
| C         | -2.3638            | -2.1507 | -0.8455 | -2.2716            | -2.2133 | -0.8225 |
| C         | -2.9536            | -1.0464 | -0.2795 | -2.8972            | -1.0719 | -0.2604 |
| C         | -0.9720            | -2.2107 | -1.1002 | -0.9076            | -2.2592 | -1.0673 |
| C         | -2.0969            | -0.0334 | 0.2687  | -2.0780            | -0.0562 | 0.3038  |
| C         | -0.1488            | -1.1198 | -0.7441 | -0.1020            | -1.1218 | -0.7226 |
| C         | -0.6919            | -0.1711 | 0.1975  | -0.6628            | -0.1897 | 0.2452  |
| C         | -0.3943            | -3.3657 | -1.7006 | -0.2825            | -3.3851 | -1.6964 |
| C         | 0.9506             | -3.4284 | -1.9000 | 1.0428             | -3.3598 | -1.9839 |
| C         | 1.7667             | -2.2772 | -1.7080 | 1.8086             | -2.1638 | -1.8024 |
| C         | 1.1787             | -1.0536 | -1.3025 | 1.1636             | -0.9724 | -1.3332 |

|   |         |         |         |         |         |         |
|---|---------|---------|---------|---------|---------|---------|
| H | -2.9603 | -2.9990 | -1.1736 | -2.8670 | -3.0740 | -1.1179 |
| C | -4.4102 | -0.8996 | -0.1626 | -4.3354 | -0.9365 | -0.1713 |
| H | -1.0401 | -4.2094 | -1.9362 | -0.8880 | -4.2657 | -1.9029 |
| H | 1.4220  | -4.3411 | -2.2595 | 1.5480  | -4.2360 | -2.3856 |
| C | 3.1714  | -2.3508 | -1.9085 | 3.1990  | -2.1590 | -1.9813 |
| C | 1.9528  | 0.1537  | -1.4565 | 1.8922  | 0.2807  | -1.4507 |
| C | 3.3571  | 0.0300  | -1.5380 | 3.3060  | 0.2213  | -1.5294 |
| C | 3.9504  | -1.2485 | -1.7267 | 3.9424  | -1.0164 | -1.7502 |
| H | 3.6098  | -3.3140 | -2.1633 | 3.6923  | -3.0904 | -2.2531 |
| H | 5.0350  | -1.3114 | -1.7972 | 5.0285  | -1.0424 | -1.8165 |
| C | -1.8173 | 2.1080  | 1.3659  | -1.7950 | 2.0394  | 1.5047  |
| C | -2.6512 | 1.1286  | 0.8860  | -2.6424 | 1.0794  | 0.9685  |
| C | -0.4248 | 1.9045  | 1.4585  | -0.4136 | 1.8248  | 1.5840  |
| C | 0.1245  | 0.6641  | 1.0456  | 0.1414  | 0.5888  | 1.1180  |
| C | 0.4262  | 2.9290  | 1.9610  | 0.4734  | 2.8402  | 2.0278  |
| C | 1.7651  | 2.7137  | 2.0613  | 1.8270  | 2.6330  | 2.0474  |
| C | 2.3006  | 1.4090  | 1.8671  | 2.3711  | 1.3402  | 1.8188  |
| C | 1.4577  | 0.3405  | 1.4875  | 1.5062  | 0.2719  | 1.4766  |
| H | -2.2540 | 3.0346  | 1.7340  | -2.2284 | 2.9613  | 1.8876  |
| C | -4.1085 | 1.3381  | 0.9521  | -4.0852 | 1.2716  | 1.0353  |
| H | -0.0151 | 3.8898  | 2.2177  | 0.0563  | 3.8074  | 2.3025  |
| H | 2.4407  | 3.5106  | 2.3667  | 2.5055  | 3.4388  | 2.3217  |
| C | 3.6904  | 1.1778  | 2.0902  | 3.7661  | 1.1016  | 1.9851  |
| C | 1.9622  | -1.0088 | 1.6532  | 2.0025  | -1.0703 | 1.6270  |
| C | 3.3551  | -1.2034 | 1.8637  | 3.4037  | -1.2791 | 1.7800  |
| C | 4.2116  | -0.0742 | 2.0219  | 4.2755  | -0.1574 | 1.9048  |
| H | 4.3241  | 2.0367  | 2.3046  | 4.4138  | 1.9568  | 2.1703  |
| H | 5.2776  | -0.2452 | 2.1631  | 5.3445  | -0.3368 | 2.0041  |
| C | 3.8696  | -2.5108 | 1.9990  | 3.9033  | -2.5940 | 1.8694  |
| C | 1.1277  | -2.1469 | 1.7332  | 1.1523  | -2.2004 | 1.7013  |
| C | 4.1836  | 1.1914  | -1.4667 | 4.0754  | 1.4217  | -1.4386 |
| C | 1.3824  | 1.4758  | -1.6273 | 1.2585  | 1.5602  | -1.6051 |
| C | 3.6414  | 2.4341  | -1.3974 | 3.4697  | 2.6352  | -1.3728 |
| C | 2.2328  | 2.6124  | -1.5364 | 2.0537  | 2.7433  | -1.5083 |
| H | 5.2633  | 1.0509  | -1.4558 | 5.1604  | 1.3346  | -1.4199 |
| H | 4.2724  | 3.3173  | -1.3126 | 4.0540  | 3.5490  | -1.2808 |
| C | 1.6883  | 3.9084  | -1.6659 | 1.4373  | 4.0066  | -1.6024 |
| C | 0.0351  | 1.7001  | -1.9935 | -0.1135 | 1.7174  | -1.9249 |
| O | -4.5902 | 2.3660  | 1.4241  | -4.5930 | 2.2740  | 1.5667  |
| C | -7.2061 | -0.5728 | 0.0631  | -7.1386 | -0.6312 | -0.0033 |
| C | -6.6684 | -1.7185 | -0.5264 | -6.5832 | -1.7572 | -0.6252 |
| C | -5.2973 | -1.8766 | -0.6391 | -5.2125 | -1.9028 | -0.7079 |
| H | -4.9174 | -2.7775 | -1.1123 | -4.8136 | -2.7795 | -1.2105 |
| H | -0.6154 | 0.8504  | -2.1808 | -0.7196 | 0.8371  | -2.1166 |
| H | 2.3573  | 4.7618  | -1.5643 | 2.0594  | 4.8943  | -1.4999 |
| C | 3.0353  | -3.6036 | 2.0066  | 3.0534  | -3.6776 | 1.8721  |

|           |         |            |         |         |            |         |
|-----------|---------|------------|---------|---------|------------|---------|
| H         | 3.4409  | -4.6052    | 2.1252  | 3.4523  | -4.6855    | 1.9543  |
| H         | -1.5077 | 3.1058     | -2.4386 | -1.7394 | 3.0487     | -2.2911 |
| C         | 1.6472  | -3.4103    | 1.9049  | 1.6639  | -3.4729    | 1.8170  |
| <b>1F</b> |         |            |         |         |            |         |
|           | E(S0) = | -1342.6669 | A.U.    | E(S1) = | -1342.5915 | A.U.    |
|           | x       | y          | z       | x       | y          | z       |
| H         | -4.0261 | -2.5580    | 1.0569  | 3.9027  | 2.5747     | 1.1922  |
| H         | -6.4429 | -2.3335    | 1.3067  | 6.3135  | 2.3641     | 1.4947  |
| H         | -7.6063 | -0.2175    | 0.7985  | 7.5129  | 0.2799     | 0.9133  |
| O         | -3.7078 | 2.8729     | -0.6127 | 3.7362  | -2.8452    | -0.7349 |
| C         | -4.4865 | -1.6124    | 0.7907  | 4.3931  | 1.6532     | 0.8942  |
| C         | -4.4348 | 0.6785     | 0.0776  | 4.3756  | -0.6537    | 0.0667  |
| C         | -2.1277 | 1.0437     | -0.2650 | 2.1472  | -1.0220    | -0.3637 |
| C         | -2.3114 | -0.2901    | 0.0584  | 2.2930  | 0.3539     | 0.0541  |
| C         | -0.8422 | 1.6144     | -0.4200 | 0.8799  | -1.5951    | -0.5275 |
| C         | -1.2130 | -1.1856    | -0.0220 | 1.1754  | 1.2321     | -0.0345 |
| C         | 0.2895  | 0.7726     | -0.2341 | -0.2658 | -0.7734    | -0.2807 |
| C         | 0.0744  | -0.6542    | -0.3147 | -0.0897 | 0.6801     | -0.3536 |
| C         | -0.6663 | 2.9896     | -0.7361 | 0.7226  | -2.9800    | -0.8287 |
| C         | 0.5893  | 3.5056     | -0.8377 | -0.5223 | -3.5319    | -0.8392 |
| C         | 1.7232  | 2.7458     | -0.4412 | -1.6418 | -2.7870    | -0.3883 |
| C         | 1.5648  | 1.4112     | -0.0055 | -1.4842 | -1.4282    | 0.0334  |
| C         | -3.4501 | 1.7178     | -0.3171 | 3.4550  | -1.6747    | -0.3996 |
| C         | -3.7562 | -0.5260    | 0.3315  | 3.6677  | 0.5654     | 0.3613  |
| H         | -1.5497 | 3.5923     | -0.9215 | 1.6197  | -3.5465    | -1.0607 |
| H         | 0.7423  | 4.5372     | -1.1498 | -0.6754 | -4.5665    | -1.1389 |
| C         | 3.0160  | 3.3498     | -0.4521 | -2.9300 | -3.3809    | -0.3783 |
| C         | 2.6691  | 0.8061     | 0.7143  | -2.5856 | -0.8201    | 0.7695  |
| C         | 3.9510  | 1.4184     | 0.6544  | -3.8659 | -1.4327    | 0.7214  |
| C         | 4.1031  | 2.6849     | 0.0164  | -4.0155 | -2.7053    | 0.0963  |
| H         | 3.1076  | 4.3556     | -0.8582 | -3.0339 | -4.3886    | -0.7751 |
| H         | 5.0947  | 3.1319     | -0.0247 | -5.0051 | -3.1571    | 0.0686  |
| C         | -0.3350 | -3.4511    | -0.0671 | 0.2515  | 3.4755     | -0.1492 |
| C         | -1.3732 | -2.5985    | 0.1217  | 1.3052  | 2.6473     | 0.0871  |
| C         | 0.9140  | -2.9728    | -0.5576 | -0.9770 | 2.9634     | -0.6429 |
| C         | 1.0966  | -1.5794    | -0.7644 | -1.1258 | 1.5550     | -0.8214 |
| C         | 1.9386  | -3.8773    | -0.9084 | -2.0308 | 3.8329     | -0.9960 |
| C         | 3.0916  | -3.4370    | -1.5135 | -3.1846 | 3.3499     | -1.5642 |
| C         | 3.2309  | -2.0735    | -1.8247 | -3.2990 | 1.9727     | -1.8380 |
| C         | 2.2565  | -1.1723    | -1.4628 | -2.2975 | 1.1032     | -1.4832 |
| H         | -0.4636 | -4.5222    | 0.0763  | 0.3560  | 4.5517     | -0.0252 |
| H         | -2.3476 | -2.9967    | 0.3759  | 2.2665  | 3.0720     | 0.3517  |
| H         | 1.7827  | -4.9369    | -0.7128 | -1.8997 | 4.8999     | -0.8241 |
| H         | 3.8739  | -4.1414    | -1.7842 | -3.9903 | 4.0276     | -1.8343 |
| H         | 4.1089  | -1.7272    | -2.3640 | -4.1824 | 1.5948     | -2.3467 |
| H         | 2.3798  | -0.1272    | -1.7301 | -2.4011 | 0.0500     | -1.7275 |

|           |         |            |         |         |            |         |
|-----------|---------|------------|---------|---------|------------|---------|
| C         | 5.0542  | 0.7988     | 1.2808  | -4.9635 | -0.8169    | 1.3564  |
| C         | 2.5318  | -0.3383    | 1.5320  | -2.4351 | 0.3163     | 1.5849  |
| C         | 4.8994  | -0.3591    | 2.0050  | -4.8000 | 0.3430     | 2.0810  |
| C         | 3.6156  | -0.9108    | 2.1576  | -3.5178 | 0.8926     | 2.2197  |
| H         | 6.0300  | 1.2747     | 1.1968  | -5.9398 | -1.2925    | 1.2823  |
| H         | 5.7551  | -0.8254    | 2.4868  | -5.6507 | 0.8099     | 2.5702  |
| H         | 3.4731  | -1.7892    | 2.7823  | -3.3690 | 1.7739     | 2.8383  |
| H         | 1.5476  | -0.7722    | 1.6822  | -1.4487 | 0.7497     | 1.7235  |
| C         | -5.8730 | -1.4793    | 0.9493  | 5.7537  | 1.5298     | 1.0800  |
| C         | -6.5300 | -0.2887    | 0.6675  | 6.4388  | 0.3350     | 0.7537  |
| C         | -5.7974 | 0.8188     | 0.2306  | 5.7529  | -0.7565    | 0.2559  |
| H         | -6.2724 | 1.7745     | 0.0198  | 6.2568  | -1.6906    | 0.0180  |
| <b>2F</b> |         |            |         |         |            |         |
|           | E(S0) = | -1496.2014 | A.U.    | E(S1) = | -1496.1199 | A.U.    |
| H         | -8.1289 | -2.3879    | 1.2205  | 8.0375  | 2.4186     | 1.3448  |
| H         | -5.7031 | -2.8257    | 1.0594  | 5.6113  | 2.8432     | 1.1652  |
| H         | -9.0311 | -0.1256    | 0.7224  | 8.9599  | 0.1722     | 0.7909  |
| C         | -7.9623 | -0.3084    | 0.6488  | 7.8899  | 0.3457     | 0.7084  |
| C         | -7.4506 | -1.5893    | 0.9307  | 7.3644  | 1.6277     | 1.0246  |
| H         | -3.4586 | -2.0635    | 0.6281  | 3.3896  | 2.0690     | 0.6812  |
| C         | -6.0992 | -1.8352    | 0.8417  | 6.0224  | 1.8638     | 0.9260  |
| C         | -7.1109 | 0.7088     | 0.2831  | 7.0609  | -0.6673    | 0.3049  |
| O         | -2.4898 | 3.3626     | -0.8124 | 2.4922  | -3.3818    | -0.9193 |
| C         | -3.7990 | -1.0650    | 0.3679  | 3.7507  | 1.0834     | 0.3984  |
| C         | -3.4873 | 1.2381     | -0.2572 | 3.4394  | -1.2451    | -0.2975 |
| C         | -1.1439 | 1.3593     | -0.4456 | 1.1531  | -1.3701    | -0.5436 |
| C         | -1.4821 | 0.0386     | -0.1916 | 1.4762  | -0.0012    | -0.2192 |
| C         | 0.2027  | 1.7985     | -0.4906 | -0.1776 | -1.8046    | -0.5866 |
| C         | -0.4740 | -0.9630    | -0.2493 | 0.4585  | 0.9923     | -0.2815 |
| C         | 1.2261  | 0.8387     | -0.2648 | -1.2062 | -0.8465    | -0.3067 |
| C         | 0.8758  | -0.5558    | -0.4297 | -0.8811 | 0.5725     | -0.4777 |
| C         | 0.5382  | 3.1591     | -0.7274 | -0.5080 | -3.1761    | -0.7989 |
| C         | 1.8437  | 3.5470     | -0.7139 | -1.8012 | -3.5843    | -0.6858 |
| C         | 2.8617  | 2.6589     | -0.2747 | -2.7947 | -2.6967    | -0.1961 |
| C         | 2.5370  | 1.3309     | 0.0837  | -2.4583 | -1.3446    | 0.1339  |
| C         | -2.3773 | 2.1750     | -0.5495 | 2.3727  | -2.1728    | -0.6349 |
| C         | -2.9490 | -0.0608    | -0.0096 | 2.8865  | 0.0692     | -0.0201 |
| H         | -0.2644 | 3.8563     | -0.9458 | 0.3015  | -3.8492    | -1.0649 |
| H         | 2.1223  | 4.5690     | -0.9647 | -2.0894 | -4.6083    | -0.9143 |
| C         | 4.2070  | 3.1233     | -0.1669 | -4.1332 | -3.1406    | -0.0600 |
| C         | 3.5178  | 0.5838     | 0.8480  | -3.4282 | -0.5801    | 0.9092  |
| C         | 4.8561  | 1.0596     | 0.9063  | -4.7672 | -1.0477    | 0.9890  |
| C         | 5.1829  | 2.3287     | 0.3424  | -5.1006 | -2.3243    | 0.4521  |
| H         | 4.4305  | 4.1296     | -0.5166 | -4.3765 | -4.1485    | -0.3896 |
| H         | 6.2154  | 2.6701     | 0.3912  | -6.1322 | -2.6641    | 0.5211  |

|   |         |         |         |         |         |         |
|---|---------|---------|---------|---------|---------|---------|
| C | 0.1691  | -3.3028 | -0.3671 | -0.2241 | 3.3169  | -0.4628 |
| C | -0.7882 | -2.3554 | -0.1991 | 0.7487  | 2.3886  | -0.2521 |
| C | 1.4922  | -2.9348 | -0.7430 | -1.5356 | 2.9234  | -0.8374 |
| C | 1.8299  | -1.5597 | -0.8584 | -1.8496 | 1.5333  | -0.9203 |
| C | 2.4428  | -3.9242 | -1.0739 | -2.5113 | 3.8878  | -1.1668 |
| C | 3.6757  | -3.5788 | -1.5732 | -3.7525 | 3.5112  | -1.6206 |
| C | 3.9756  | -2.2235 | -1.7962 | -4.0374 | 2.1433  | -1.8007 |
| C | 3.0738  | -1.2435 | -1.4518 | -3.1123 | 1.1847  | -1.4674 |
| H | -0.0780 | -4.3603 | -0.2965 | 0.0064  | 4.3795  | -0.4104 |
| H | -1.8153 | -2.6601 | -0.0407 | 1.7675  | 2.7169  | -0.0822 |
| H | 2.1655  | -4.9696 | -0.9496 | -2.2501 | 4.9403  | -1.0699 |
| H | 4.4001  | -4.3475 | -1.8296 | -4.4976 | 4.2611  | -1.8729 |
| H | 4.9217  | -1.9457 | -2.2540 | -4.9939 | 1.8420  | -2.2208 |
| H | 3.3222  | -0.2055 | -1.6509 | -3.3497 | 0.1392  | -1.6410 |
| C | 5.8409  | 0.3022  | 1.5767  | -5.7404 | -0.2825 | 1.6642  |
| C | 3.2036  | -0.5716 | 1.5981  | -3.0944 | 0.5717  | 1.6436  |
| C | 5.5153  | -0.8619 | 2.2312  | -5.3977 | 0.8869  | 2.3061  |
| C | 4.1742  | -1.2810 | 2.2679  | -4.0571 | 1.2964  | 2.3193  |
| H | 6.8638  | 0.6755  | 1.5838  | -6.7647 | -0.6498 | 1.6879  |
| H | 6.2810  | -1.4355 | 2.7473  | -6.1527 | 1.4701  | 2.8263  |
| H | 3.8971  | -2.1645 | 2.8378  | -3.7670 | 2.1865  | 2.8716  |
| H | 2.1716  | -0.9051 | 1.6579  | -2.0598 | 0.9005  | 1.6836  |
| C | -5.2009 | -0.8135 | 0.4656  | 5.1251  | 0.8400  | 0.5041  |
| C | -5.7216 | 0.4846  | 0.1836  | 5.6624  | -0.4644 | 0.1892  |
| C | -4.8156 | 1.5200  | -0.1749 | 4.7887  | -1.4939 | -0.2025 |
| H | -5.1797 | 2.5281  | -0.3704 | 5.1748  | -2.4891 | -0.4194 |
| H | -7.4952 | 1.7038  | 0.0657  | 7.4620  | -1.6506 | 0.0661  |

|   | <b>3F</b>               |         |         |                         |         |         |
|---|-------------------------|---------|---------|-------------------------|---------|---------|
|   | E(S0) = -1342.6670 A.U. |         |         | E(S1) = -1342.5906 A.U. |         |         |
|   | x                       | y       | z       | x                       | y       | z       |
| H | 4.0025                  | -2.8332 | -0.3991 | 3.9970                  | -2.8326 | -0.5273 |
| H | 6.4255                  | -2.7745 | -0.1193 | 6.4140                  | -2.7474 | -0.2618 |
| H | 7.6146                  | -0.6849 | 0.4365  | 7.5761                  | -0.6567 | 0.3708  |
| O | 3.7521                  | 2.7315  | 0.7624  | 3.7243                  | 2.7468  | 0.8622  |
| C | 4.4734                  | -1.8807 | -0.1812 | 4.4618                  | -1.8865 | -0.2709 |
| C | 4.4486                  | 0.4714  | 0.2943  | 4.3960                  | 0.4893  | 0.3170  |
| C | 2.1474                  | 0.9867  | 0.1696  | 2.1530                  | 0.9840  | 0.2199  |
| C | 2.3086                  | -0.3550 | -0.1344 | 2.3133                  | -0.4044 | -0.1517 |
| C | 0.8931                  | 1.6349  | 0.0725  | 0.9033                  | 1.6126  | 0.1425  |
| C | 1.1733                  | -1.1641 | -0.3917 | 1.1686                  | -1.2113 | -0.4000 |
| C | -0.2424                 | 0.8569  | -0.2606 | -0.2221                 | 0.8291  | -0.2441 |
| C | -0.1228                 | -0.5819 | -0.2333 | -0.1194                 | -0.6274 | -0.2045 |
| C | 0.7657                  | 3.0411  | 0.2925  | 0.7592                  | 3.0207  | 0.3608  |
| C | -0.4287                 | 3.6607  | 0.1144  | -0.4227                 | 3.6349  | 0.1036  |
| C | -1.5440                 | 2.9550  | -0.4267 | -1.4991                 | 2.9186  | -0.5013 |
| C | -1.4364                 | 1.5624  | -0.6887 | -1.3698                 | 1.5178  | -0.7516 |



|           |         |            |         |         |            |         |
|-----------|---------|------------|---------|---------|------------|---------|
| C         | 3.4776  | 1.5833     | 0.4545  | 3.4551  | 1.5770     | 0.5141  |
| C         | 3.7541  | -0.7022    | -0.0446 | 3.7050  | -0.7108    | -0.0763 |
| H         | 1.6470  | 3.5871     | 0.6140  | 1.6300  | 3.5561     | 0.7272  |
| H         | -0.5373 | 4.7252     | 0.3151  | -0.5528 | 4.6986     | 0.2942  |
| C         | -2.7275 | 3.6451     | -0.7646 | -2.6799 | 3.5823     | -0.8789 |
| C         | -2.4828 | 0.9565     | -1.4198 | -2.3914 | 0.8838     | -1.5062 |
| C         | -3.6186 | 1.6541     | -1.7638 | -3.5234 | 1.5626     | -1.8872 |
| C         | -3.7623 | 3.0046     | -1.4044 | -3.6878 | 2.9164     | -1.5430 |
| H         | -2.7919 | 4.7061     | -0.5283 | -2.7747 | 4.6424     | -0.6510 |
| H         | -4.6688 | 3.5458     | -1.6631 | -4.5928 | 3.4445     | -1.8318 |
| C         | 0.1613  | -3.2750    | -1.0046 | 0.1126  | -3.3325    | -0.9111 |
| C         | 1.2759  | -2.5196    | -0.8146 | 1.2433  | -2.5706    | -0.7956 |
| C         | -1.1098 | -2.7975    | -0.5871 | -1.1365 | -2.8347    | -0.4856 |
| C         | -1.2370 | -1.4890    | -0.0716 | -1.2315 | -1.4955    | -0.0046 |
| C         | -2.2481 | -3.6527    | -0.6706 | -2.3028 | -3.6485    | -0.5622 |
| C         | -3.4553 | -3.2559    | -0.1919 | -3.5048 | -3.1938    | -0.1202 |
| C         | -3.5787 | -2.0279    | 0.5221  | -3.6023 | -1.9402    | 0.5578  |
| C         | -2.4538 | -1.1674    | 0.6493  | -2.4515 | -1.1187    | 0.6938  |
| H         | 0.2339  | -4.2831    | -1.4074 | 0.1693  | -4.3501    | -1.2920 |
| H         | 2.2493  | -2.9272    | -1.0593 | 2.2005  | -2.9938    | -1.0766 |
| H         | -2.1240 | -4.6278    | -1.1378 | -2.2073 | -4.6401    | -1.0003 |
| H         | -4.3321 | -3.8941    | -0.2856 | -4.4005 | -3.8052    | -0.2116 |
| C         | -4.7955 | -1.6910    | 1.1537  | -4.8165 | -1.5438    | 1.1539  |
| C         | -2.5701 | -0.0691    | 1.5304  | -2.5367 | -0.0067    | 1.5557  |
| C         | -3.7584 | 0.2262     | 2.1583  | -3.7288 | 0.3527     | 2.1484  |
| C         | -4.8958 | -0.5714    | 1.9445  | -4.8891 | -0.4030    | 1.9218  |
| H         | -5.6485 | -2.3540    | 1.0188  | -5.6929 | -2.1744    | 1.0141  |
| H         | -5.8363 | -0.3227    | 2.4294  | -5.8299 | -0.1090    | 2.3798  |
| H         | -3.8122 | 1.0777     | 2.8321  | -3.7632 | 1.2183     | 2.8049  |
| H         | -1.7019 | 0.5533     | 1.7260  | -1.6452 | 0.5785     | 1.7658  |
| H         | -4.4033 | 1.1563     | -2.3284 | -4.2880 | 1.0543     | -2.4686 |
| H         | -2.3897 | -0.0808    | -1.7277 | -2.2688 | -0.1541    | -1.8017 |
| C         | 5.8640  | -1.8501    | -0.0076 | 5.8308  | -1.8427    | -0.1108 |
| C         | 6.5357  | -0.6762    | 0.3084  | 6.4951  | -0.6482    | 0.2556  |
| C         | 5.8149  | 0.5101     | 0.4721  | 5.7803  | 0.5133     | 0.4770  |
| H         | 6.3021  | 1.4461     | 0.7367  | 6.2673  | 1.4395     | 0.7735  |
| <b>4F</b> |         |            |         |         |            |         |
|           | E(S0) = | -1496.1949 | A.U.    | E(S1) = | -1496.1212 | A.U.    |
|           | x       | y          | z       | x       | y          | z       |
| H         | 0.4817  | -2.3498    | 2.9471  | 0.2879  | -2.3865    | 2.8588  |
| H         | 2.6204  | -3.6366    | 2.9407  | 2.4121  | -3.6901    | 2.9031  |
| H         | 4.6618  | -2.5946    | 1.9937  | 4.5020  | -2.6541    | 2.0678  |
| C         | 1.3641  | -1.9372    | 2.4635  | 1.1912  | -1.9686    | 2.4214  |
| C         | 2.5722  | -2.6555    | 2.4749  | 2.3926  | -2.6972    | 2.4612  |
| H         | -4.0222 | -2.8777    | 0.2937  | -3.8712 | -2.9027    | 0.4271  |
| H         | -6.4327 | -2.9474    | 0.6408  | -6.2729 | -2.9976    | 0.8216  |

|   |         |         |         |         |         |         |
|---|---------|---------|---------|---------|---------|---------|
| H | -7.7960 | -0.8908 | 0.6884  | -7.6733 | -0.9582 | 0.7851  |
| O | -4.2497 | 2.8013  | -0.0285 | -4.2594 | 2.8055  | -0.1586 |
| C | -4.5693 | -1.9413 | 0.2826  | -4.4482 | -1.9850 | 0.3728  |
| C | -4.7468 | 0.4471  | 0.1457  | -4.6661 | 0.4376  | 0.1204  |
| C | -2.5008 | 1.1033  | -0.1640 | -2.4988 | 1.1112  | -0.2658 |
| C | -2.5477 | -0.2812 | -0.1468 | -2.5019 | -0.3306 | -0.1734 |
| C | -1.2808 | 1.8192  | -0.2245 | -1.3002 | 1.8323  | -0.3327 |
| C | -1.3740 | -1.0263 | -0.4384 | -1.3167 | -1.0563 | -0.4771 |
| C | -0.0744 | 1.0729  | -0.2747 | -0.0778 | 1.0888  | -0.3155 |
| C | -0.1609 | -0.3164 | -0.6553 | -0.1241 | -0.3258 | -0.7038 |
| C | -1.2414 | 3.2425  | -0.2328 | -1.2747 | 3.2591  | -0.3189 |
| C | -0.0429 | 3.8830  | -0.3038 | -0.0811 | 3.9103  | -0.2746 |
| C | 1.1793  | 3.1682  | -0.1629 | 1.1275  | 3.1915  | -0.0690 |
| C | 1.1589  | 1.7654  | 0.0367  | 1.0989  | 1.7677  | 0.0957  |
| C | -3.8774 | 1.6395  | -0.0202 | -3.8600 | 1.6240  | -0.1143 |
| C | -3.9540 | -0.7125 | 0.0921  | -3.8425 | -0.7397 | 0.1035  |
| H | -2.1820 | 3.7839  | -0.2343 | -2.2269 | 3.7774  | -0.3789 |
| H | 0.0038  | 4.9654  | -0.4099 | -0.0282 | 4.9938  | -0.3604 |
| C | 2.4194  | 3.8596  | -0.2201 | 2.3711  | 3.8573  | -0.0930 |
| C | 2.3674  | 1.1380  | 0.5162  | 2.3040  | 1.1190  | 0.5847  |
| C | 3.5899  | 1.8153  | 0.3109  | 3.5352  | 1.7888  | 0.4105  |
| C | 3.5920  | 3.1810  | -0.0837 | 3.5426  | 3.1594  | 0.0490  |
| H | 2.4079  | 4.9292  | -0.4205 | 2.3827  | 4.9294  | -0.2775 |
| H | 4.5489  | 3.6840  | -0.2101 | 4.5013  | 3.6649  | -0.0491 |
| C | -0.2564 | -3.1376 | -0.8870 | -0.1699 | -3.1245 | -1.0338 |
| C | -1.3765 | -2.4515 | -0.5449 | -1.2963 | -2.4743 | -0.6327 |
| C | 0.9150  | -2.4463 | -1.3100 | 0.9837  | -2.4000 | -1.4349 |
| C | 0.9348  | -1.0270 | -1.2811 | 0.9758  | -0.9745 | -1.3488 |
| C | 2.0190  | -3.1548 | -1.8293 | 2.1135  | -3.0649 | -1.9534 |
| C | 3.0849  | -2.4885 | -2.3865 | 3.1879  | -2.3582 | -2.4412 |
| C | 3.0532  | -1.0860 | -2.4755 | 3.1400  | -0.9513 | -2.4654 |
| C | 2.0035  | -0.3759 | -1.9388 | 2.0636  | -0.2782 | -1.9396 |
| H | -0.2618 | -4.2253 | -0.9232 | -0.1575 | -4.2099 | -1.1140 |
| H | -2.2897 | -2.9963 | -0.3416 | -2.1972 | -3.0442 | -0.4384 |
| H | 1.9917  | -4.2430 | -1.8095 | 2.1062  | -4.1533 | -1.9796 |
| H | 3.9277  | -3.0420 | -2.7926 | 4.0526  | -2.8804 | -2.8426 |
| H | 3.8581  | -0.5559 | -2.9789 | 3.9562  | -0.3900 | -2.9140 |
| H | 1.9901  | 0.7051  | -2.0413 | 2.0337  | 0.8054  | -2.0052 |
| C | 4.8285  | 1.1320  | 0.5028  | 4.7629  | 1.0951  | 0.6278  |
| C | 2.4123  | -0.1304 | 1.2137  | 2.3115  | -0.1435 | 1.2685  |
| C | 4.8583  | -0.1577 | 0.9272  | 4.7662  | -0.1967 | 1.0494  |
| C | 3.6566  | -0.8061 | 1.3399  | 3.5476  | -0.8362 | 1.4218  |
| H | 5.7490  | 1.6673  | 0.2762  | 5.6939  | 1.6224  | 0.4293  |
| H | 5.8007  | -0.6928 | 1.0298  | 5.6992  | -0.7431 | 1.1733  |
| C | 3.7016  | -2.0839 | 1.9382  | 3.5530  | -2.1267 | 1.9881  |
| C | 1.2902  | -0.7066 | 1.8510  | 1.1528  | -0.7211 | 1.8421  |

|           |         |            |         |         |            |         |
|-----------|---------|------------|---------|---------|------------|---------|
| C         | -5.9546 | -1.9820    | 0.4941  | -5.8068 | -2.0385    | 0.6101  |
| C         | -6.7238 | -0.8263    | 0.5241  | -6.6063 | -0.8729    | 0.5948  |
| C         | -6.1090 | 0.4173     | 0.3530  | -6.0374 | 0.3644     | 0.3570  |
| H         | -6.6739 | 1.3465     | 0.3847  | -6.6283 | 1.2777     | 0.3582  |
| H         | 0.3524  | -0.1594    | 1.8778  | 0.2264  | -0.1542    | 1.8582  |
| <b>SF</b> |         |            |         |         |            |         |
|           | E(S0) = | -1496.1949 | A.U.    | E(S1) = | -1496.1214 | A.U.    |
|           | x       | y          | z       | x       | y          | z       |
| H         | 4.4565  | -2.7827    | -0.5161 | 4.3776  | -2.7601    | -0.7984 |
| H         | 6.8890  | -2.6601    | -0.4891 | 6.8068  | -2.6318    | -0.8368 |
| H         | 8.0768  | -0.5325    | -0.0991 | 8.0046  | -0.5388    | -0.2834 |
| O         | 4.1861  | 2.8094     | 0.5202  | 4.1795  | 2.7921     | 0.7003  |
| C         | 4.9191  | -1.8165    | -0.3472 | 4.8557  | -1.8239    | -0.5285 |
| C         | 4.8845  | 0.5436     | 0.0798  | 4.8233  | 0.5343     | 0.1186  |
| C         | 2.5732  | 1.0142     | 0.1491  | 2.5752  | 0.9962     | 0.2745  |
| C         | 2.7304  | -0.3412    | -0.0884 | 2.7136  | -0.4058    | -0.0476 |
| C         | 1.3044  | 1.6438     | 0.1391  | 1.3214  | 1.6208     | 0.2652  |
| C         | 1.5881  | -1.1838    | -0.1405 | 1.5623  | -1.2408    | -0.0593 |
| C         | 0.1603  | 0.8363     | -0.0915 | 0.1777  | 0.8161     | -0.0310 |
| C         | 0.3057  | -0.5948    | 0.0744  | 0.2924  | -0.6337    | 0.1664  |
| C         | 1.1570  | 3.0426     | 0.3577  | 1.1799  | 3.0290     | 0.4462  |
| C         | -0.0834 | 3.6031     | 0.3375  | -0.0429 | 3.6062     | 0.2937  |
| C         | -1.2162 | 2.8564     | -0.0897 | -1.1419 | 2.8537     | -0.2013 |
| C         | -1.0717 | 1.4986     | -0.4466 | -0.9876 | 1.4679     | -0.5089 |
| C         | 3.9099  | 1.6441     | 0.2866  | 3.8940  | 1.6112     | 0.4119  |
| C         | 4.1864  | -0.6557    | -0.1451 | 4.1103  | -0.6792    | -0.1758 |
| H         | 2.0454  | 3.6260     | 0.5776  | 2.0668  | 3.5907     | 0.7236  |
| H         | -0.2210 | 4.6548     | 0.5829  | -0.1935 | 4.6637     | 0.5014  |
| C         | -2.4953 | 3.4841     | -0.1606 | -2.4145 | 3.4641     | -0.3318 |
| C         | -2.1603 | 0.8735     | -1.1674 | -2.0589 | 0.8144     | -1.2464 |
| C         | -3.4355 | 1.5018     | -1.1700 | -3.3306 | 1.4441     | -1.3118 |
| C         | -3.5828 | 2.8055     | -0.6107 | -3.4890 | 2.7637     | -0.7992 |
| H         | -2.5802 | 4.5146     | 0.1799  | -2.5217 | 4.5013     | -0.0210 |
| H         | -4.5679 | 3.2685     | -0.6211 | -4.4717 | 3.2283     | -0.8546 |
| C         | 0.5494  | -3.3570    | -0.3836 | 0.4924  | -3.4119    | -0.1433 |
| C         | 1.6686  | -2.5837    | -0.3894 | 1.6242  | -2.6513    | -0.2152 |
| C         | -0.6915 | -2.8299    | 0.0652  | -0.7386 | -2.8426    | 0.2557  |
| C         | -0.7834 | -1.4708    | 0.4337  | -0.8044 | -1.4535    | 0.5561  |
| C         | -1.8381 | -3.6743    | 0.1392  | -1.9161 | -3.6398    | 0.3096  |
| C         | -3.0226 | -3.2008    | 0.6063  | -3.1082 | -3.1047    | 0.6886  |
| C         | -3.1043 | -1.8946    | 1.1726  | -3.1743 | -1.7730    | 1.1989  |
| C         | -1.9617 | -1.0490    | 1.1632  | -2.0050 | -0.9664    | 1.2170  |
| H         | 0.6007  | -4.4096    | -0.6551 | 0.5313  | -4.4805    | -0.3456 |
| H         | 2.6232  | -3.0274    | -0.6428 | 2.5745  | -3.1294    | -0.4198 |
| H         | -1.7437 | -4.7007    | -0.2105 | -1.8431 | -4.6830    | 0.0079  |
| H         | -3.9101 | -3.8310    | 0.6216  | -4.0162 | -3.7049    | 0.6839  |

|   |         |         |         |         |         |         |
|---|---------|---------|---------|---------|---------|---------|
| C | -4.2915 | -1.4619 | 1.8025  | -4.3715 | -1.2812 | 1.7591  |
| C | -2.0176 | 0.1316  | 1.9377  | -2.0524 | 0.2381  | 1.9479  |
| C | -3.1754 | 0.5181  | 2.5739  | -3.2264 | 0.6893  | 2.5144  |
| C | -4.3388 | -0.2645 | 2.4760  | -4.4076 | -0.0583 | 2.3906  |
| H | -5.1625 | -2.1144 | 1.7678  | -5.2621 | -1.9055 | 1.7083  |
| H | -5.2558 | 0.0568  | 2.9633  | -5.3340 | 0.3082  | 2.8254  |
| H | -3.1841 | 1.4322  | 3.1629  | -3.2295 | 1.6239  | 3.0698  |
| H | -1.1257 | 0.7414  | 2.0490  | -1.1439 | 0.8187  | 2.0850  |
| C | -4.5299 | 0.8609  | -1.7907 | -4.4052 | 0.7925  | -1.9524 |
| C | -2.0091 | -0.3002 | -1.9399 | -1.8836 | -0.3804 | -1.9693 |
| C | -4.3664 | -0.3266 | -2.4637 | -4.2225 | -0.4195 | -2.5797 |
| C | -3.0823 | -0.8886 | -2.5696 | -2.9419 | -0.9903 | -2.6139 |
| H | -5.5036 | 1.3471  | -1.7514 | -5.3765 | 1.2838  | -1.9648 |
| H | -5.2143 | -0.8072 | -2.9454 | -5.0541 | -0.9128 | -3.0757 |
| H | -2.9308 | -1.7896 | -3.1594 | -2.7742 | -1.9163 | -3.1584 |
| H | -1.0222 | -0.7384 | -2.0587 | -0.8962 | -0.8300 | -2.0325 |
| C | 6.3193  | -1.7482 | -0.3283 | 6.2334  | -1.7507 | -0.5603 |
| C | 6.9905  | -0.5527 | -0.1083 | 6.9181  | -0.5538 | -0.2481 |
| C | 6.2603  | 0.6201  | 0.1034  | 6.2157  | 0.5883  | 0.0869  |
| H | 6.7479  | 1.5757  | 0.2840  | 6.7189  | 1.5244  | 0.3187  |

| <b>6F</b> |                    |         |         |                    |         |         |
|-----------|--------------------|---------|---------|--------------------|---------|---------|
|           | E(S0) = -1649.7293 |         |         | E(S1) = -1649.6499 |         |         |
|           | x                  | y       | z       | x                  | y       | z       |
| H         | -8.6160            | -2.6590 | 0.4426  | -8.5647            | -2.6735 | 0.5334  |
| H         | -6.1731            | -3.0165 | 0.5070  | -6.1223            | -3.0292 | 0.5898  |
| H         | -9.5415            | -0.3810 | 0.0758  | -9.4910            | -0.3990 | 0.1197  |
| C         | -8.4650            | -0.5280 | 0.1030  | -8.4135            | -0.5416 | 0.1426  |
| C         | -7.9402            | -1.8178 | 0.3107  | -7.8858            | -1.8389 | 0.3786  |
| H         | -3.9301            | -2.1653 | 0.3691  | -3.8930            | -2.1748 | 0.4164  |
| C         | -6.5790            | -2.0190 | 0.3471  | -6.5338            | -2.0373 | 0.4102  |
| C         | -7.6170            | 0.5423  | -0.0653 | -7.5764            | 0.5241  | -0.0557 |
| O         | -3.0115            | 3.3879  | -0.5339 | -2.9978            | 3.4127  | -0.6115 |
| C         | -4.2708            | -1.1458 | 0.2153  | -4.2414            | -1.1611 | 0.2404  |
| C         | -3.9775            | 1.2117  | -0.1587 | -3.9287            | 1.2214  | -0.1973 |
| C         | -1.6323            | 1.4053  | -0.1798 | -1.6332            | 1.4176  | -0.2449 |
| C         | -1.9453            | 0.0695  | 0.0272  | -1.9400            | 0.0301  | 0.0103  |
| C         | -0.2984            | 1.8861  | -0.1380 | -0.3145            | 1.8890  | -0.2091 |
| C         | -0.9028            | -0.8983 | 0.0767  | -0.8947            | -0.9304 | 0.0497  |
| C         | 0.7416             | 0.9501  | 0.0910  | 0.7270             | 0.9443  | 0.0591  |
| C         | 0.4383             | -0.4530 | -0.1113 | 0.4411             | -0.4768 | -0.1676 |
| C         | 0.0100             | 3.2632  | -0.3193 | -0.0061            | 3.2750  | -0.3526 |
| C         | 1.3059             | 3.6789  | -0.2647 | 1.2766             | 3.6977  | -0.1917 |
| C         | 2.3378             | 2.7989  | 0.1618  | 2.2800             | 2.8055  | 0.2762  |
| C         | 2.0332             | 1.4579  | 0.4820  | 1.9609             | 1.4405  | 0.5515  |
| C         | -2.8792            | 2.1915  | -0.3237 | -2.8634            | 2.1942  | -0.3850 |
| C         | -3.4200            | -0.0854 | 0.0546  | -3.3666            | -0.0930 | 0.0460  |

|           |         |            |         |         |            |         |
|-----------|---------|------------|---------|---------|------------|---------|
| H         | -0.8025 | 3.9483     | -0.5388 | -0.8198 | 3.9454     | -0.6122 |
| H         | 1.5662  | 4.7134     | -0.4819 | 1.5524  | 4.7346     | -0.3731 |
| C         | 3.6789  | 3.2741     | 0.2674  | 3.6162  | 3.2537     | 0.4073  |
| C         | 3.0311  | 0.6951     | 1.2026  | 2.9502  | 0.6460     | 1.2661  |
| C         | 4.3689  | 1.1741     | 1.2410  | 4.2901  | 1.1161     | 1.3329  |
| C         | 4.6734  | 2.4655     | 0.7172  | 4.6030  | 2.4169     | 0.8480  |
| H         | 3.8869  | 4.2956     | -0.0462 | 3.8465  | 4.2774     | 0.1192  |
| H         | 5.7045  | 2.8126     | 0.7544  | 5.6347  | 2.7589     | 0.9040  |
| C         | -0.1163 | -3.1786    | 0.2792  | -0.0764 | -3.2092    | 0.1596  |
| C         | -1.1426 | -2.2845    | 0.2922  | -1.1112 | -2.3223    | 0.2415  |
| C         | 1.1805  | -2.7839    | -0.1443 | 1.2043  | -2.7925    | -0.2716 |
| C         | 1.4276  | -1.4355    | -0.4795 | 1.4308  | -1.4182    | -0.5660 |
| C         | 2.2291  | -3.7476    | -0.2226 | 2.2756  | -3.7242    | -0.3479 |
| C         | 3.4658  | -3.3970    | -0.6617 | 3.5189  | -3.3350    | -0.7422 |
| C         | 3.6996  | -2.0956    | -1.1967 | 3.7395  | -2.0149    | -1.2378 |
| C         | 2.6565  | -1.1302    | -1.1834 | 2.6765  | -1.0715    | -1.2322 |
| H         | -0.2884 | -4.2242    | 0.5265  | -0.2331 | -4.2619    | 0.3871  |
| H         | -2.1433 | -2.6244    | 0.5276  | -2.0974 | -2.6817    | 0.5096  |
| H         | 2.0173  | -4.7646    | 0.1021  | 2.0814  | -4.7536    | -0.0520 |
| H         | 4.2793  | -4.1203    | -0.6788 | 4.3471  | -4.0411    | -0.7571 |
| C         | 4.9366  | -1.7822    | -1.8003 | 4.9829  | -1.6615    | -1.8019 |
| C         | 2.8529  | 0.0535     | -1.9296 | 2.8644  | 0.1306     | -1.9441 |
| C         | 4.0559  | 0.3244     | -2.5412 | 4.0807  | 0.4471     | -2.5129 |
| C         | 5.1249  | -0.5830    | -2.4457 | 5.1626  | -0.4412    | -2.4134 |
| H         | 5.7303  | -2.5269    | -1.7696 | 5.7920  | -2.3894    | -1.7691 |
| H         | 6.0792  | -0.3540    | -2.9133 | 6.1237  | -0.1823    | -2.8504 |
| H         | 4.1739  | 1.2445     | -3.1086 | 4.1937  | 1.3846     | -3.0519 |
| H         | 2.0344  | 0.7593     | -2.0392 | 2.0320  | 0.8200     | -2.0608 |
| C         | 5.3723  | 0.3989     | 1.8619  | 5.2831  | 0.3262     | 1.9499  |
| C         | 2.7339  | -0.4720    | 1.9418  | 2.6370  | -0.5318    | 1.9686  |
| C         | 5.0632  | -0.7782    | 2.5015  | 4.9592  | -0.8665    | 2.5563  |
| C         | 3.7222  | -1.1934    | 2.5727  | 3.6188  | -1.2774    | 2.5926  |
| H         | 6.3952  | 0.7722     | 1.8501  | 6.3068  | 0.6961     | 1.9614  |
| H         | 5.8424  | -1.3632    | 2.9836  | 5.7281  | -1.4672    | 3.0347  |
| H         | 3.4591  | -2.0858    | 3.1358  | 3.3436  | -2.1863    | 3.1219  |
| H         | 1.7018  | -0.7988    | 2.0330  | 1.6032  | -0.8601    | 2.0330  |
| C         | -5.6833 | -0.9411    | 0.1788  | -5.6283 | -0.9565    | 0.2096  |
| C         | -6.2178 | 0.3647     | -0.0318 | -6.1680 | 0.3604     | -0.0306 |
| C         | -5.3159 | 1.4497     | -0.2046 | -5.2860 | 1.4361     | -0.2344 |
| H         | -5.6913 | 2.4584     | -0.3732 | -5.6718 | 2.4373     | -0.4221 |
| H         | -8.0116 | 1.5439     | -0.2273 | -7.9779 | 1.5195     | -0.2376 |
| <b>7F</b> |         |            |         |         |            |         |
|           | E(S0) = | -1649.7225 | A.U.    | E(S1) = | -1649.6506 | A.U.    |
|           | x       | y          | z       | x       | y          | z       |
| H         | 0.1461  | -2.7511    | -3.0171 | 0.4270  | -2.8983    | -2.7942 |
| H         | -1.9650 | -4.0821    | -3.0784 | -1.6475 | -4.2724    | -2.9513 |

|   |         |         |         |         |         |         |
|---|---------|---------|---------|---------|---------|---------|
| H | -4.0954 | -3.0122 | -2.3943 | -3.8417 | -3.2369 | -2.4480 |
| C | -0.7811 | -2.3190 | -2.6477 | -0.5302 | -2.4715 | -2.5049 |
| C | -1.9723 | -3.0640 | -2.6969 | -1.7024 | -3.2426 | -2.6074 |
| H | 4.4264  | -2.8352 | 0.4792  | 4.3551  | -2.8495 | 0.2000  |
| H | 6.8631  | -2.8781 | 0.4238  | 6.7862  | -2.8829 | 0.0766  |
| H | 8.1889  | -0.8193 | 0.1192  | 8.1059  | -0.7947 | -0.0630 |
| O | 4.5254  | 2.8125  | -0.2289 | 4.4823  | 2.8916  | -0.0859 |
| C | 4.9534  | -1.8999 | 0.3257  | 4.8899  | -1.9058 | 0.1654  |
| C | 5.0756  | 0.4755  | 0.0084  | 4.9975  | 0.5320  | 0.0540  |
| C | 2.7994  | 1.0998  | -0.0134 | 2.7789  | 1.1483  | 0.1042  |
| C | 2.8689  | -0.2738 | 0.1492  | 2.8387  | -0.2880 | 0.2377  |
| C | 1.5672  | 1.7814  | -0.1741 | 1.5572  | 1.8102  | -0.0729 |
| C | 1.6798  | -1.0233 | 0.3562  | 1.6545  | -1.0192 | 0.5263  |
| C | 0.3746  | 1.0173  | -0.1293 | 0.3703  | 1.0133  | -0.0843 |
| C | 0.4448  | -0.3139 | 0.4319  | 0.4205  | -0.3064 | 0.5595  |
| C | 1.5019  | 3.1926  | -0.3594 | 1.4803  | 3.2128  | -0.3264 |
| C | 0.2904  | 3.8012  | -0.4747 | 0.2725  | 3.7793  | -0.5906 |
| C | -0.9036 | 3.0393  | -0.6211 | -0.8825 | 2.9717  | -0.7872 |
| C | -0.8403 | 1.6242  | -0.6295 | -0.7844 | 1.5457  | -0.7163 |
| C | 4.1741  | 1.6511  | -0.0996 | 4.1305  | 1.6990  | 0.0153  |
| C | 4.3004  | -0.6863 | 0.1672  | 4.2173  | -0.6673 | 0.1677  |
| H | 2.4288  | 3.7573  | -0.3482 | 2.3998  | 3.7866  | -0.2619 |
| H | 0.2155  | 4.8865  | -0.5159 | 0.1682  | 4.8581  | -0.6895 |
| C | -2.1563 | 3.6960  | -0.7495 | -2.1495 | 3.5691  | -0.9544 |
| C | -1.9974 | 0.9021  | -1.0975 | -1.9180 | 0.7646  | -1.1758 |
| C | -3.2444 | 1.5656  | -1.0776 | -3.1840 | 1.3897  | -1.2040 |
| C | -3.3026 | 2.9708  | -0.8738 | -3.2775 | 2.7966  | -1.0551 |
| H | -2.1802 | 4.7830  | -0.6987 | -2.2186 | 4.6549  | -0.9418 |
| H | -4.2759 | 3.4580  | -0.8890 | -4.2618 | 3.2587  | -1.1014 |
| C | 0.5010  | -3.1078 | 0.7009  | 0.4891  | -3.0412 | 1.1740  |
| C | 1.6661  | -2.4422 | 0.4760  | 1.6509  | -2.4032 | 0.8458  |
| C | -0.6834 | -2.3976 | 1.0348  | -0.7067 | -2.3128 | 1.3683  |
| C | -0.6800 | -0.9867 | 1.0337  | -0.7028 | -0.8991 | 1.1979  |
| C | -1.8637 | -3.1133 | 1.3904  | -1.9136 | -2.9852 | 1.7058  |
| C | -2.9735 | -2.4589 | 1.8201  | -3.0659 | -2.2934 | 1.9230  |
| C | -2.9397 | -1.0506 | 2.0401  | -3.0532 | -0.8680 | 1.9816  |
| C | -1.7758 | -0.3089 | 1.6965  | -1.8522 | -0.1620 | 1.7014  |
| H | 0.4748  | -4.1957 | 0.7069  | 0.4768  | -4.1166 | 1.3407  |
| H | 2.5802  | -3.0008 | 0.3170  | 2.5761  | -2.9659 | 0.8117  |
| H | -1.8508 | -4.1984 | 1.3054  | -1.8973 | -4.0723 | 1.7565  |
| H | -3.8829 | -3.0030 | 2.0697  | -3.9974 | -2.8142 | 2.1374  |
| C | -4.0282 | -0.4018 | 2.6636  | -4.1998 | -0.1581 | 2.3967  |
| C | -1.7098 | 1.0359  | 2.1290  | -1.8086 | 1.2089  | 2.0286  |
| C | -2.7723 | 1.6413  | 2.7594  | -2.9320 | 1.8797  | 2.4638  |
| C | -3.9596 | 0.9284  | 3.0020  | -4.1510 | 1.1998  | 2.6153  |
| H | -4.8006 | 1.4171  | 3.4875  | -5.0381 | 1.7356  | 2.9434  |

|   |         |         |         |         |         |         |
|---|---------|---------|---------|---------|---------|---------|
| H | -2.6858 | 2.6769  | 3.0797  | -2.8659 | 2.9387  | 2.7011  |
| H | -0.7938 | 1.6009  | 1.9817  | -0.8682 | 1.7487  | 1.9510  |
| C | -4.4506 | 0.8311  | -1.2878 | -4.3607 | 0.6169  | -1.4339 |
| C | -1.9604 | -0.4357 | -1.6529 | -1.8166 | -0.5795 | -1.6764 |
| C | -4.4217 | -0.4960 | -1.5734 | -4.2792 | -0.7118 | -1.7056 |
| C | -3.1780 | -1.1499 | -1.8214 | -3.0091 | -1.3330 | -1.8835 |
| H | -5.3960 | 1.3628  | -1.1945 | -5.3242 | 1.1206  | -1.3828 |
| H | -5.3425 | -1.0635 | -1.6972 | -5.1763 | -1.3094 | -1.8555 |
| C | -3.1517 | -2.4758 | -2.3063 | -2.9201 | -2.6715 | -2.3205 |
| C | -0.7793 | -1.0393 | -2.1422 | -0.5876 | -1.1734 | -2.0556 |
| C | 6.3549  | -1.9247 | 0.3021  | 6.2684  | -1.9270 | 0.0828  |
| C | 7.1037  | -0.7675 | 0.1327  | 7.0220  | -0.7355 | -0.0022 |
| C | 6.4536  | 0.4615  | -0.0123 | 6.3883  | 0.4932  | -0.0226 |
| H | 7.0046  | 1.3913  | -0.1359 | 6.9448  | 1.4246  | -0.1029 |
| H | 0.1485  | -0.4747 | -2.1390 | 0.3225  | -0.5808 | -2.0249 |
| H | -4.9164 | -0.9884 | 2.8930  | -5.1182 | -0.7158 | 2.5729  |

|   | <b>8F</b>               |         |         |                         |         |         |
|---|-------------------------|---------|---------|-------------------------|---------|---------|
|   | E(S0) = -1803.2506 A.U. |         |         | E(S1) = -1803.1809 A.U. |         |         |
|   | x                       | y       | z       | x                       | y       | z       |
| H | 4.0432                  | -3.7964 | 1.8370  | 4.1465                  | -3.8240 | 1.5993  |
| H | -0.2416                 | -4.0515 | 1.9849  | -0.1285                 | -4.1140 | 1.9101  |
| C | 0.6648                  | -3.4607 | 1.8752  | 0.7683                  | -3.5121 | 1.7843  |
| H | 1.9849                  | -5.1778 | 1.9255  | 2.1004                  | -5.2189 | 1.7278  |
| H | -0.4064                 | -1.6246 | 1.8142  | -0.3144                 | -1.6803 | 1.8396  |
| H | -0.5760                 | 3.8858  | -2.1340 | -0.8856                 | 3.8586  | -1.9544 |
| H | 1.4521                  | 5.3186  | -1.8748 | 1.0736                  | 5.3825  | -1.7180 |
| H | 3.6661                  | 4.2438  | -1.5669 | 3.3519                  | 4.4260  | -1.5298 |
| C | 0.3905                  | 3.4305  | -1.9303 | 0.1088                  | 3.4457  | -1.8037 |
| C | 1.5334                  | 4.2371  | -1.7984 | 1.2152                  | 4.3052  | -1.6837 |
| H | -4.7678                 | 2.4310  | 1.4152  | -4.7224                 | 2.5673  | 1.0783  |
| H | -7.2018                 | 2.3072  | 1.3894  | -7.1502                 | 2.4282  | 1.0153  |
| H | -8.3924                 | 0.4118  | 0.3504  | -8.3132                 | 0.3970  | 0.2129  |
| O | -4.5029                 | -2.5458 | -1.3355 | -4.4266                 | -2.7503 | -1.0789 |
| C | -5.2336                 | 1.5801  | 0.9304  | -5.1826                 | 1.6463  | 0.7356  |
| C | -5.2026                 | -0.5128 | -0.2423 | -5.1095                 | -0.6158 | -0.1707 |
| C | -2.8906                 | -0.9129 | -0.5022 | -2.8479                 | -1.0278 | -0.3606 |
| C | -3.0487                 | 0.2941  | 0.1581  | -3.0090                 | 0.2807  | 0.2252  |
| C | -1.6203                 | -1.3973 | -0.9062 | -1.5900                 | -1.5040 | -0.7551 |
| C | -1.9063                 | 1.0040  | 0.6185  | -1.8738                 | 0.9893  | 0.6973  |
| C | -0.4816                 | -0.6163 | -0.5908 | -0.4627                 | -0.6590 | -0.5167 |
| C | -0.6260                 | 0.4145  | 0.4125  | -0.5924                 | 0.3995  | 0.4960  |
| C | -1.4660                 | -2.6442 | -1.5771 | -1.4224                 | -2.7423 | -1.4449 |
| C | -0.2171                 | -3.0975 | -1.8722 | -0.1841                 | -3.1088 | -1.8723 |
| C | 0.9236                  | -2.2606 | -1.7175 | 0.9108                  | -2.2039 | -1.7909 |
| C | 0.7664                  | -0.9346 | -1.2464 | 0.7141                  | -0.8843 | -1.2726 |
| C | -4.2267                 | -1.4935 | -0.7829 | -4.1586                 | -1.6304 | -0.6024 |

|   |         |         |         |         |         |         |
|---|---------|---------|---------|---------|---------|---------|
| C | -4.5039 | 0.5627  | 0.3330  | -4.4184 | 0.5420  | 0.3123  |
| H | -2.3537 | -3.2351 | -1.7792 | -2.2987 | -3.3711 | -1.5689 |
| H | -0.0708 | -4.0941 | -2.2855 | -0.0088 | -4.0896 | -2.3105 |
| C | 2.2187  | -2.7543 | -2.0291 | 2.2135  | -2.6215 | -2.1311 |
| C | 1.8622  | -0.0170 | -1.4462 | 1.7753  | 0.0863  | -1.4722 |
| C | 3.1512  | -0.5623 | -1.6395 | 3.0827  | -0.3989 | -1.7005 |
| C | 3.3102  | -1.9523 | -1.8914 | 3.2813  | -1.7709 | -1.9902 |
| H | 2.3180  | -3.7948 | -2.3330 | 2.3619  | -3.6502 | -2.4533 |
| H | 4.3154  | -2.3402 | -2.0470 | 4.2950  | -2.1209 | -2.1769 |
| C | -0.8530 | 2.9195  | 1.6540  | -0.8189 | 2.8368  | 1.8546  |
| C | -1.9832 | 2.2774  | 1.2538  | -1.9501 | 2.2214  | 1.4070  |
| C | 0.4026  | 2.2525  | 1.6479  | 0.4385  | 2.1875  | 1.7856  |
| C | 0.4833  | 0.9147  | 1.1922  | 0.5133  | 0.8624  | 1.2610  |
| C | 1.5743  | 2.9267  | 2.0835  | 1.6256  | 2.8580  | 2.1627  |
| C | 2.7753  | 2.2853  | 2.0753  | 2.8395  | 2.2392  | 2.0468  |
| C | 2.8434  | 0.8867  | 1.8299  | 2.9167  | 0.8523  | 1.7537  |
| C | 1.6720  | 0.1632  | 1.5148  | 1.7387  | 0.1191  | 1.4888  |
| H | -0.8979 | 3.9364  | 2.0391  | -0.8671 | 3.8276  | 2.3027  |
| H | -2.9415 | 2.7738  | 1.3438  | -2.9115 | 2.6974  | 1.5578  |
| H | 1.4942  | 3.9719  | 2.3756  | 1.5539  | 3.8924  | 2.4935  |
| H | 3.6937  | 2.8125  | 2.3279  | 3.7620  | 2.7772  | 2.2580  |
| C | 4.0962  | 0.2121  | 1.9382  | 4.1795  | 0.1887  | 1.7796  |
| C | 1.7238  | -1.2811 | 1.6291  | 1.8051  | -1.3190 | 1.5706  |
| C | 2.9900  | -1.9223 | 1.7203  | 3.0812  | -1.9535 | 1.5846  |
| C | 4.1772  | -1.1375 | 1.8169  | 4.2642  | -1.1596 | 1.6370  |
| H | 4.9880  | 0.8138  | 2.1061  | 5.0742  | 0.7952  | 1.9102  |
| H | 5.1369  | -1.6491 | 1.8680  | 5.2294  | -1.6632 | 1.6297  |
| C | 3.0599  | -3.3301 | 1.7954  | 3.1606  | -3.3617 | 1.6143  |
| C | 0.5733  | -2.0913 | 1.7664  | 0.6630  | -2.1411 | 1.7258  |
| C | 4.2991  | 0.2856  | -1.6222 | 4.1908  | 0.5004  | -1.6954 |
| C | 1.7193  | 1.4220  | -1.5594 | 1.5568  | 1.5053  | -1.5594 |
| C | 4.1749  | 1.6320  | -1.5047 | 4.0013  | 1.8380  | -1.5566 |
| C | 2.8839  | 2.2384  | -1.5332 | 2.6826  | 2.3802  | -1.5404 |
| H | 5.2801  | -0.1813 | -1.6958 | 5.1908  | 0.0828  | -1.7985 |
| H | 5.0522  | 2.2755  | -1.4647 | 4.8462  | 2.5236  | -1.5243 |
| C | 2.7596  | 3.6420  | -1.6166 | 2.4799  | 3.7752  | -1.5706 |
| C | 0.4844  | 2.0619  | -1.8131 | 0.2766  | 2.0816  | -1.7462 |
| C | -6.6337 | 1.5064  | 0.9225  | -6.5626 | 1.5727  | 0.6915  |
| C | -7.3063 | 0.4404  | 0.3402  | -7.2263 | 0.4167  | 0.2307  |
| C | -6.5780 | -0.5959 | -0.2517 | -6.5005 | -0.6775 | -0.2049 |
| H | -7.0673 | -1.4531 | -0.7093 | -6.9859 | -1.5771 | -0.5771 |
| H | -0.4105 | 1.4610  | -1.9462 | -0.5845 | 1.4340  | -1.8855 |
| C | 1.9188  | -4.0948 | 1.8560  | 2.0255  | -4.1349 | 1.6951  |



# Computational Investigation of intramolecular Electrophilic Aromatic Cyclization

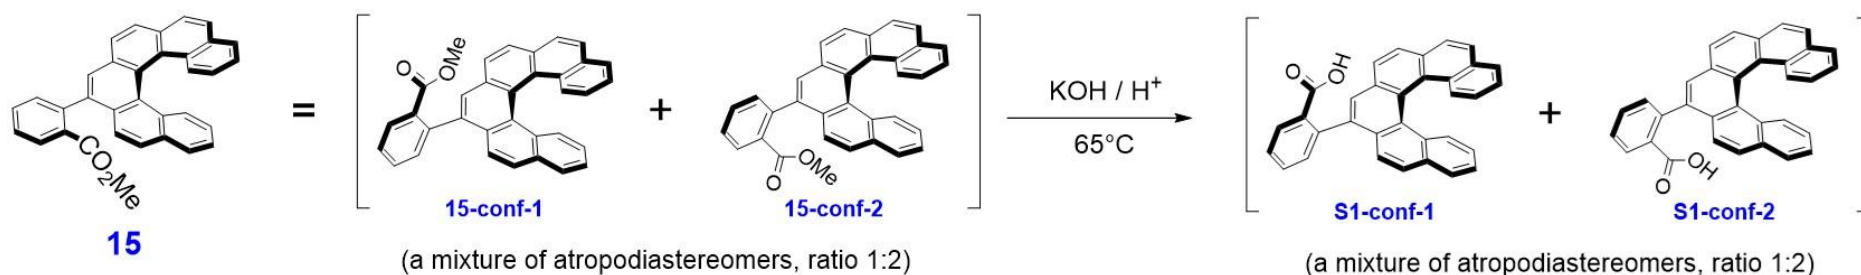

For clarity, only atropodiastereomers with *M*-helixity are shown.

## Mechanism of Intramolecular Electrophilic Aromatic Cyclization:

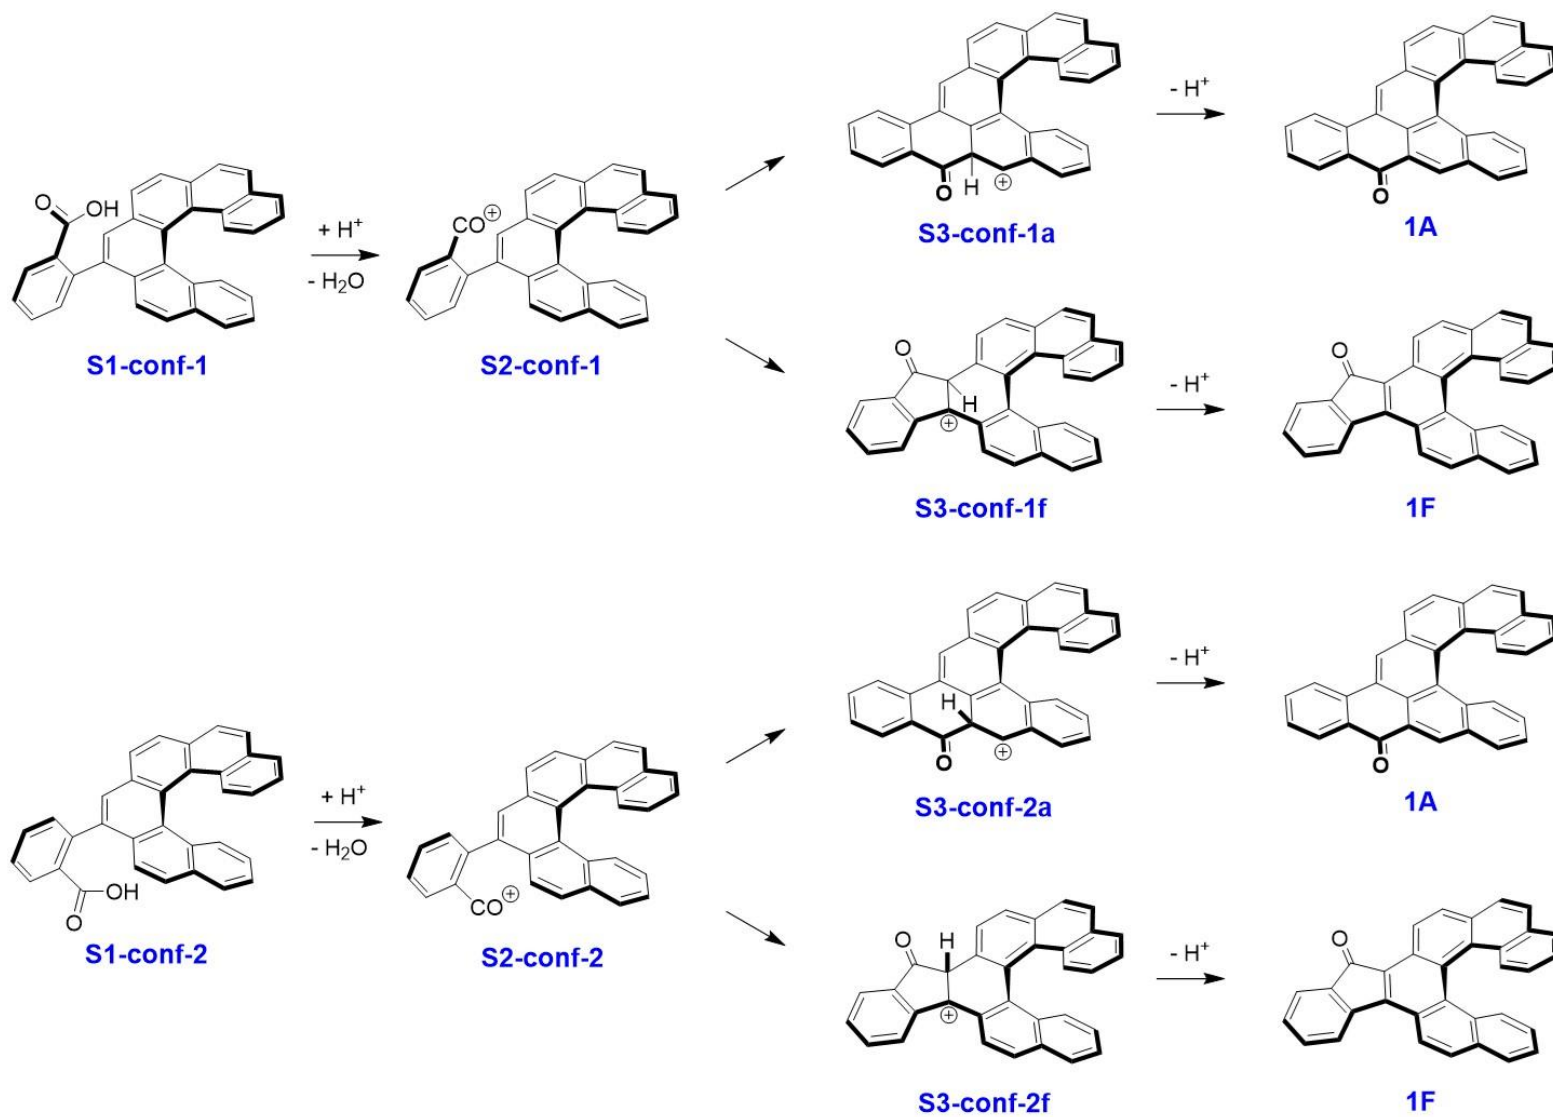

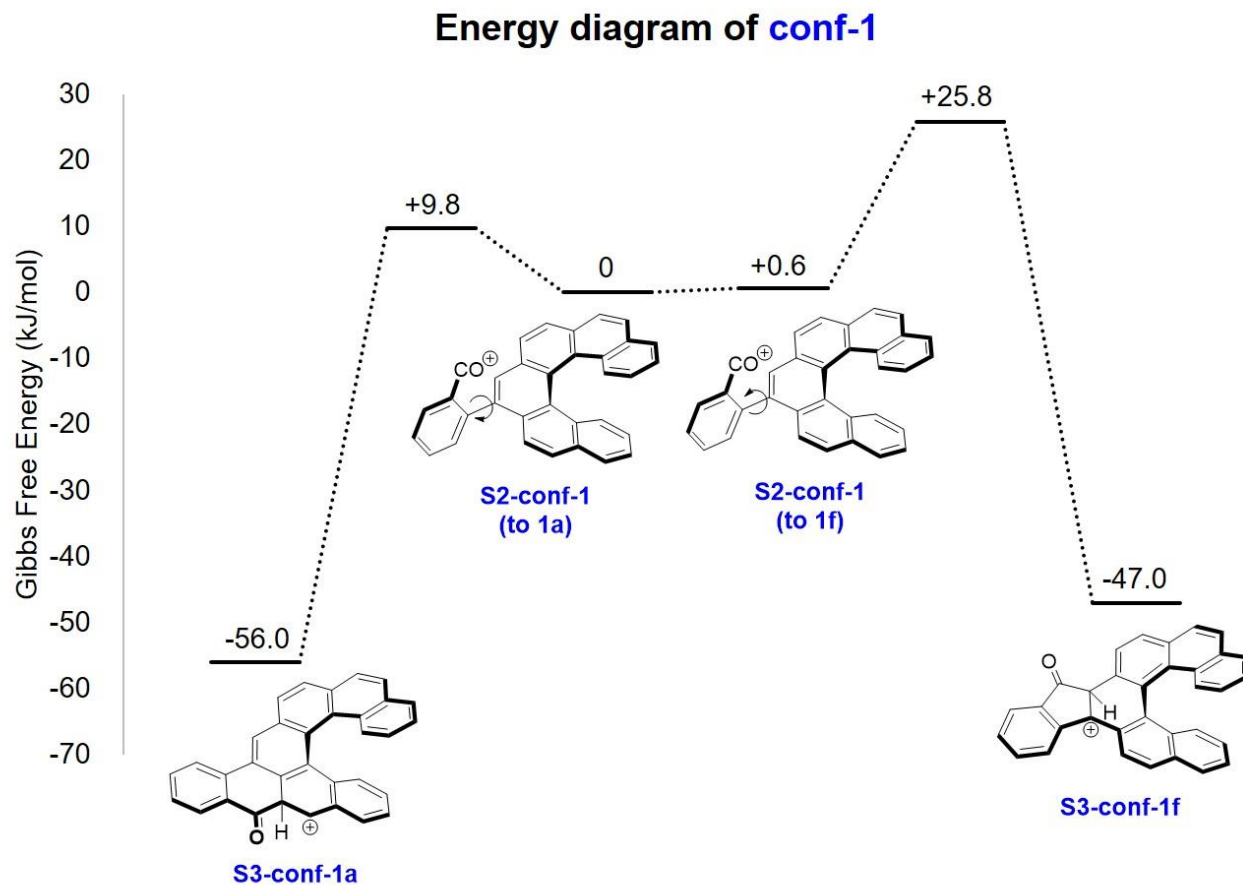

All calculations were performed using GRRM 23 program with Gaussian 16 Rev C.02. The equilibrium (EQ) and transition structures (TS) were optimized at the level of  $\omega$ B97X-D/Def2SVP. The values of the Gibbs free energy of EQs and TSs were calculated at 353.15 K.

**S2-conf-1** has two conformers that are close in energy, and these structures are in equilibrium. One conformer has a reaction pathway leading to the transition state that gives **1a**, and the other has a reaction pathway leading to the transition state that gives **1f**.

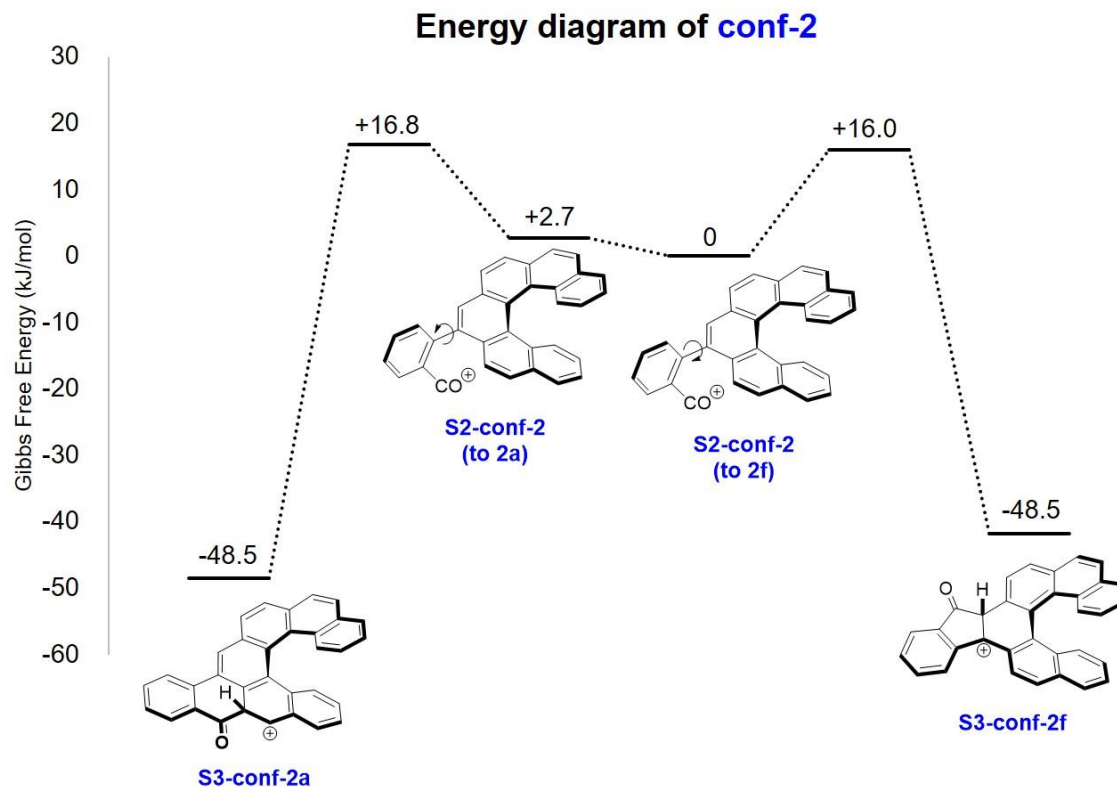

All calculations were performed using GRRM 23 program with Gaussian 16 Rev C.02. The equilibrium (EQ) and transition structures (TS) were optimized at the level of  $\omega$ B97X-D/Def2SVP. The values of the Gibbs free energy of EQs and TSs were calculated at 353.15 K.

**S2-conf-2** also has two conformers that are close in energy, and these structures are in equilibrium. One conformer has a reaction pathway leading to the transition state that gives **2a**, and the other has a reaction pathway leading to the transition state that gives **2f**.

**Table S6. Optimized geometry (Cartesian coordinates, Å) of S2-conf-1 (to\_1a)**

|   |             |             |             |
|---|-------------|-------------|-------------|
| C | -0.42401600 | -0.79563600 | -0.77707100 |
| C | -0.04963500 | 0.59472400  | -0.57172100 |
| C | 0.55864600  | -1.64467300 | -1.34956000 |
| C | -1.71568300 | -1.37278600 | -0.48060900 |
| C | -2.08981600 | -2.54153700 | -1.18265000 |
| C | 0.18329900  | -2.88703100 | -1.93997400 |
| C | -1.12331800 | -3.26898100 | -1.94013100 |
| C | -2.62483900 | -0.86876800 | 0.54025600  |
| C | -3.43619800 | -3.02586700 | -1.10520100 |
| C | 1.92650700  | -1.27876000 | -1.26289100 |
| H | 0.94986300  | -3.50332800 | -2.41438200 |
| H | -1.43714300 | -4.18051300 | -2.45282600 |
| C | 1.31530800  | 0.90989700  | -0.38860200 |
| C | -1.00259400 | 1.69305500  | -0.64847000 |
| C | -0.60355900 | 2.99088700  | -0.23036100 |
| C | 1.69763900  | 2.25306200  | -0.04990900 |
| C | 0.76672200  | 3.23344500  | 0.09301500  |
| C | -2.30500300 | 1.55162700  | -1.18926800 |
| C | -1.53808300 | 4.05500100  | -0.23034400 |
| C | 2.30869200  | -0.10335500 | -0.66138300 |
| H | 1.07078200  | 4.24586400  | 0.36822800  |
| C | -2.23219100 | 0.04126400  | 1.55187700  |
| C | -3.95734300 | -1.35950900 | 0.57760000  |
| C | -4.87179800 | -0.84294000 | 1.52674600  |
| C | -3.13087100 | 0.51123000  | 2.48437000  |
| C | -4.47409900 | 0.09042800  | 2.45677000  |
| C | -4.34907900 | -2.42021700 | -0.30301300 |
| H | -5.89800800 | -1.21744600 | 1.52366900  |
| H | -1.19536000 | 0.36836800  | 1.61197500  |
| H | -2.79575200 | 1.20912500  | 3.25412600  |
| H | -5.18541300 | 0.47809100  | 3.18831000  |
| C | -3.18913200 | 2.60665100  | -1.20976800 |
| H | -4.18349000 | 2.46613600  | -1.63731000 |
| C | -2.81866000 | 3.86436800  | -0.69419500 |
| H | -5.38144100 | -2.77543200 | -0.27038400 |
| H | -3.71395500 | -3.89012100 | -1.71204000 |
| H | 2.67685000  | -2.01026700 | -1.57397500 |
| C | 3.72085500  | 0.07188400  | -0.29662000 |
| H | -1.21513200 | 5.03891700  | 0.11744400  |
| H | -2.61433100 | 0.59917600  | -1.61491100 |
| C | 4.09034200  | 0.42003900  | 1.03922600  |
| C | 4.77834100  | -0.13923100 | -1.18675400 |
| C | 3.09467900  | 0.51964100  | 1.99897500  |
| C | 5.43981900  | 0.59079000  | 1.45769200  |
| C | 6.09985500  | 0.01776400  | -0.78251600 |
| H | 4.54830500  | -0.39728100 | -2.22169300 |
| H | 6.89831400  | -0.13830000 | -1.51132600 |
| C | 6.43765700  | 0.39007500  | 0.53112200  |
| H | 5.67095300  | 0.86563400  | 2.48827100  |
| H | 7.48223400  | 0.51713000  | 0.81705900  |
| H | 2.75362700  | 2.51110200  | 0.05382600  |
| O | 2.34031900  | 0.57538800  | 2.83537600  |
| H | -3.53265600 | 4.68989600  | -0.69845500 |

**Table S7. Optimized geometry (Cartesian coordinates, Å) of S3-conf-1a**

|   |             |             |             |
|---|-------------|-------------|-------------|
| C | -0.46766100 | -0.95136400 | -0.76060900 |
| C | -0.03122200 | 0.38328600  | -0.41838200 |
| C | 0.51377200  | -1.79920000 | -1.33565100 |
| C | -1.80545300 | -1.47136600 | -0.59387700 |
| C | -2.19097100 | -2.55646400 | -1.41122200 |
| C | 0.11437800  | -2.98412500 | -2.02598700 |
| C | -1.20662400 | -3.29032100 | -2.14172800 |
| C | -2.75689300 | -0.98979600 | 0.39635200  |
| C | -3.56858700 | -2.94540100 | -1.47889300 |
| C | 1.88582500  | -1.48182900 | -1.19814400 |
| H | 0.87893800  | -3.61017000 | -2.49011800 |
| H | -1.52788400 | -4.14797300 | -2.73622800 |
| C | 1.33821700  | 0.63798100  | -0.25250300 |
| C | -0.93295100 | 1.52571700  | -0.36440700 |
| C | -0.54183300 | 2.72074800  | 0.35286900  |
| C | 1.80179100  | 1.97902100  | 0.20410100  |
| C | 0.77713400  | 2.89656100  | 0.68811900  |
| C | -2.18784300 | 1.55160200  | -0.99886800 |
| C | -1.49399900 | 3.77143600  | 0.59289200  |
| C | 2.32434500  | -0.32844100 | -0.57819900 |
| H | 1.11647200  | 3.77859800  | 1.24067200  |
| C | -2.38161500 | -0.22216200 | 1.52743200  |
| C | -4.12117200 | -1.36483500 | 0.27618800  |
| C | -5.07368600 | -0.84611500 | 1.18731400  |
| C | -3.31963300 | 0.24543600  | 2.42158400  |
| C | -4.68693400 | -0.03716000 | 2.23189700  |
| C | -4.50660800 | -2.32452400 | -0.71696400 |
| H | -6.12254300 | -1.12624900 | 1.06564600  |
| H | -1.32671500 | -0.02642700 | 1.71981600  |
| H | -2.99896100 | 0.81890400  | 3.29363900  |
| H | -5.42813400 | 0.34567100  | 2.93579900  |
| C | -3.05603900 | 2.60863400  | -0.80439900 |
| H | -4.02590600 | 2.58994700  | -1.30664300 |
| C | -2.73739900 | 3.70761500  | 0.03355400  |
| H | -5.56001500 | -2.60076600 | -0.79983300 |
| H | -3.85064400 | -3.74506400 | -2.16678800 |
| H | 2.60224900  | -2.22251800 | -1.55595400 |
| C | 3.74895100  | -0.08149600 | -0.24308000 |
| H | -1.17991500 | 4.63592500  | 1.18160400  |
| H | -2.49034900 | 0.72197300  | -1.63526100 |
| C | 4.10489800  | 0.98724600  | 0.60946200  |
| C | 4.77300900  | -0.93276700 | -0.67809000 |
| C | 3.10744400  | 1.98805400  | 1.03283500  |
| C | 5.42579700  | 1.15813400  | 1.04331900  |
| C | 6.08760700  | -0.74358800 | -0.26451100 |
| H | 4.55528300  | -1.76451700 | -1.34817300 |
| H | 6.86364100  | -1.42212000 | -0.62398500 |
| C | 6.42029900  | 0.29553400  | 0.60702100  |
| H | 5.64906900  | 1.99136600  | 1.71205100  |
| H | 7.45221000  | 0.43331700  | 0.93340300  |
| H | 2.15702000  | 2.51343500  | -0.71542500 |
| O | 3.28585200  | 2.84007300  | 1.86385900  |
| H | -3.46415100 | 4.50596200  | 0.18748100  |

**Table S8. Optimized geometry (Cartesian coordinates, Å) of the transition state between S2-conf-1 (to\_1a) and S3-conf-1a**

|   |          |          |          |
|---|----------|----------|----------|
| C | -0.42846 | -0.83721 | -0.88151 |
| C | -0.02698 | 0.53947  | -0.63316 |
| C | 0.52755  | -1.67296 | -1.51265 |
| C | -1.71619 | -1.41157 | -0.56752 |
| C | -2.13097 | -2.53950 | -1.31175 |
| C | 0.11793  | -2.88459 | -2.13858 |
| C | -1.19634 | -3.24609 | -2.12385 |
| C | -2.58168 | -0.94916 | 0.50852  |
| C | -3.48551 | -3.00114 | -1.21847 |
| C | 1.91159  | -1.34567 | -1.42076 |
| H | 0.86259  | -3.49450 | -2.65413 |
| H | -1.53620 | -4.12983 | -2.66773 |
| C | 1.34842  | 0.83405  | -0.55781 |
| C | -0.95887 | 1.65457  | -0.57464 |
| C | -0.51205 | 2.92239  | -0.08764 |
| C | 1.79166  | 2.16818  | -0.22269 |
| C | 0.87186  | 3.15570  | 0.06922  |
| C | -2.29640 | 1.57274  | -1.03048 |
| C | -1.43712 | 3.99004  | 0.08330  |
| C | 2.32633  | -0.18034 | -0.83506 |
| H | 1.21360  | 4.16266  | 0.32112  |
| C | -2.13323 | -0.11417 | 1.56097  |
| C | -3.92401 | -1.41020 | 0.55816  |
| C | -4.79643 | -0.92448 | 1.56170  |
| C | -2.99107 | 0.32385  | 2.54623  |
| C | -4.34655 | -0.05704 | 2.53156  |
| C | -4.36386 | -2.41624 | -0.36434 |
| H | -5.83181 | -1.27286 | 1.57000  |
| H | -1.08317 | 0.17098  | 1.61391  |
| H | -2.61368 | 0.95936  | 3.34976  |
| H | -5.02577 | 0.30394  | 3.30608  |
| C | -3.16375 | 2.63267  | -0.89050 |
| H | -4.18827 | 2.53564  | -1.25456 |
| C | -2.74821 | 3.84200  | -0.29060 |
| H | -5.40229 | -2.75182 | -0.31981 |
| H | -3.79710 | -3.83056 | -1.85669 |
| H | 2.63358  | -2.11163 | -1.71335 |
| C | 3.70283  | -0.00226 | -0.34068 |
| H | -1.07499 | 4.93977  | 0.48306  |
| H | -2.64895 | 0.66230  | -1.51000 |
| C | 3.90577  | 0.67829  | 0.88696  |
| C | 4.82857  | -0.57416 | -0.93491 |
| C | 2.83152  | 1.33718  | 1.56693  |
| C | 5.16580  | 0.75432  | 1.51519  |
| C | 6.08240  | -0.48148 | -0.33247 |
| H | 4.72451  | -1.09414 | -1.88833 |
| H | 6.94522  | -0.93042 | -0.82879 |
| C | 6.25708  | 0.17126  | 0.89187  |
| H | 5.27668  | 1.27665  | 2.46724  |
| H | 7.24359  | 0.23009  | 1.35325  |
| H | 2.80552  | 2.48855  | -0.47466 |
| O | 2.36902  | 1.70312  | 2.54582  |
| H | -3.45597 | 4.66332  | -0.16783 |

**Table S9. Optimized geometry (Cartesian coordinates, Å) of S2-conf-1 (to 1f)**

|   |             |             |             |
|---|-------------|-------------|-------------|
| C | -0.45026300 | -0.82993400 | -0.55866200 |
| C | -0.06309400 | 0.56567000  | -0.44145500 |
| C | 0.55591000  | -1.75065200 | -0.95150900 |
| C | -1.78109100 | -1.35291900 | -0.33432200 |
| C | -2.12256100 | -2.57173800 | -0.96359400 |
| C | 0.20074000  | -3.03439800 | -1.46219600 |
| C | -1.11041300 | -3.38812700 | -1.55243400 |
| C | -2.76508800 | -0.74333000 | 0.54960400  |
| C | -3.48558600 | -3.01337200 | -0.98064300 |
| C | 1.91817000  | -1.38218900 | -0.83350100 |
| H | 0.98897500  | -3.70514900 | -1.81098700 |
| H | -1.40148500 | -4.33594500 | -2.00980500 |
| C | 1.28884400  | 0.87883200  | -0.17486800 |
| C | -0.98595800 | 1.67360200  | -0.63827700 |
| C | -0.61270600 | 2.97281900  | -0.20293400 |
| C | 1.63076100  | 2.19607600  | 0.28240900  |
| C | 0.70105700  | 3.18619200  | 0.32153600  |
| C | -2.22521600 | 1.53222800  | -1.30967000 |
| C | -1.52246600 | 4.04904900  | -0.33325800 |
| C | 2.28895100  | -0.13763400 | -0.36167800 |
| H | 0.96365400  | 4.17521100  | 0.70329900  |
| C | -2.43724400 | 0.22839100  | 1.52643400  |
| C | -4.11180600 | -1.19128900 | 0.49157100  |
| C | -5.09503800 | -0.57151800 | 1.29984000  |
| C | -3.40454400 | 0.79858400  | 2.32438700  |
| C | -4.75443200 | 0.42087800  | 2.19053900  |
| C | -4.45201200 | -2.31340100 | -0.33235900 |
| H | -6.12950000 | -0.91400900 | 1.22267700  |
| H | -1.39872400 | 0.52296400  | 1.67041700  |
| H | -3.11900200 | 1.54175000  | 3.07130400  |
| H | -5.51869000 | 0.88800400  | 2.81436100  |
| C | -3.08200300 | 2.60013900  | -1.45656500 |
| H | -4.02664700 | 2.46356900  | -1.98594500 |
| C | -2.74558900 | 3.86522200  | -0.93655100 |
| H | -5.49447600 | -2.63663800 | -0.37512700 |
| H | -3.73149500 | -3.92187700 | -1.53426900 |
| H | 2.67755500  | -2.10010800 | -1.15920200 |
| C | 3.72763400  | 0.11754000  | -0.18445400 |
| H | -1.22714800 | 5.03548300  | 0.03143300  |
| H | -2.50258400 | 0.57009100  | -1.73721200 |
| C | 4.48250300  | -0.79207200 | 0.60791300  |
| C | 4.44349900  | 1.15391200  | -0.79289500 |
| C | 3.76964400  | -1.74143400 | 1.33240900  |
| C | 5.89541200  | -0.72085600 | 0.75430200  |
| C | 5.82404200  | 1.23620100  | -0.64977700 |
| H | 3.91027500  | 1.87139700  | -1.41822500 |
| H | 6.36195800  | 2.03831700  | -1.15989800 |
| C | 6.55329800  | 0.30439200  | 0.11331400  |
| H | 6.43243500  | -1.44911300 | 1.36411400  |
| H | 7.63666900  | 0.39493900  | 0.20024500  |
| H | 2.64382900  | 2.39825200  | 0.63300600  |
| O | 3.28527100  | -2.50136900 | 2.01300100  |
| H | -3.43956500 | 4.70126700  | -1.04062700 |



**Table S10. Optimized geometry (Cartesian coordinates, Å) of S3-conf-1f**

|   |             |             |             |
|---|-------------|-------------|-------------|
| C | -0.35692800 | -0.75964000 | -0.36456900 |
| C | -0.05663900 | 0.65939400  | -0.43784700 |
| C | 0.68026200  | -1.63931800 | -0.73264200 |
| C | -1.65438100 | -1.30245400 | -0.04361800 |
| C | -1.94567500 | -2.60914600 | -0.50017800 |
| C | 0.39532900  | -2.97150300 | -1.07259000 |
| C | -0.90655400 | -3.41636400 | -1.02210200 |
| C | -2.64708900 | -0.62103200 | 0.77023500  |
| C | -3.28630100 | -3.11811600 | -0.41378600 |
| C | 2.06575400  | -1.10672200 | -0.85378200 |
| H | 1.20204400  | -3.63295400 | -1.38711600 |
| H | -1.14398300 | -4.43405400 | -1.34030000 |
| C | 1.27134500  | 1.12735200  | -0.10931100 |
| C | -1.02907900 | 1.64214900  | -0.82845900 |
| C | -0.80142100 | 3.00932000  | -0.49522600 |
| C | 1.43436300  | 2.50507200  | 0.30424300  |
| C | 0.42728100  | 3.39299300  | 0.15386500  |
| C | -2.20212700 | 1.30024000  | -1.54909200 |
| C | -1.78528200 | 3.96515900  | -0.80411600 |
| C | 2.31931100  | 0.23739200  | -0.26354500 |
| H | 0.55043300  | 4.42988400  | 0.47190500  |
| C | -2.34559000 | 0.48777400  | 1.59803600  |
| C | -3.97281800 | -1.13007200 | 0.79658100  |
| C | -4.97163300 | -0.43833800 | 1.52183300  |
| C | -3.32810100 | 1.13261900  | 2.31630600  |
| C | -4.66281100 | 0.68696000  | 2.25304500  |
| C | -4.27207000 | -2.37715000 | 0.15066200  |
| H | -5.99167900 | -0.82879400 | 1.51454100  |
| H | -1.31380000 | 0.82331100  | 1.70581400  |
| H | -3.06644500 | 1.97819200  | 2.95511000  |
| H | -5.43961700 | 1.20666300  | 2.81681700  |
| C | -3.13494800 | 2.26032800  | -1.87019100 |
| H | -4.02555200 | 1.98582100  | -2.43719700 |
| C | -2.93806300 | 3.59551600  | -1.47241700 |
| H | -5.29777400 | -2.75055000 | 0.18299400  |
| H | -3.49508700 | -4.10817300 | -0.82392400 |
| H | 2.29914400  | -0.99691400 | -1.93552000 |
| C | 3.73850300  | 0.32675800  | 0.07792600  |
| H | -1.62104200 | 5.00758400  | -0.52426100 |
| H | -2.35449100 | 0.27105800  | -1.87257900 |
| C | 4.27335600  | -0.97826600 | 0.10544900  |
| C | 4.57682600  | 1.41107400  | 0.37114500  |
| C | 3.25529200  | -1.96243100 | -0.33582800 |
| C | 5.59208900  | -1.23627700 | 0.45370000  |
| C | 5.90215000  | 1.15611300  | 0.71581600  |
| H | 4.23640300  | 2.44265800  | 0.30164200  |
| H | 6.56413200  | 1.99433800  | 0.94074700  |
| C | 6.40568100  | -0.14987500 | 0.77192000  |
| H | 5.96509500  | -2.26190500 | 0.47171500  |
| H | 7.44685900  | -0.31316800 | 1.05623800  |
| H | 2.38044600  | 2.82238600  | 0.73521300  |
| O | 3.33666800  | -3.15565500 | -0.35297800 |
| H | -3.69057700 | 4.34892300  | -1.71351700 |

**Table S11. Optimized geometry (Cartesian coordinates, Å) of the transition state between S2-conf-1 to S3-conf-1f**

|   |          |          |          |
|---|----------|----------|----------|
| C | -0.38074 | -0.77421 | -0.57688 |
| C | -0.04727 | 0.64100  | -0.53374 |
| C | 0.63980  | -1.65915 | -1.00787 |
| C | -1.67497 | -1.33939 | -0.26924 |
| C | -1.99534 | -2.59370 | -0.83888 |
| C | 0.31677  | -2.96601 | -1.46315 |
| C | -0.98265 | -3.38157 | -1.45809 |
| C | -2.63902 | -0.73511 | 0.63924  |
| C | -3.33784 | -3.09218 | -0.76816 |
| C | 1.99516  | -1.22313 | -0.97698 |
| H | 1.11098  | -3.61229 | -1.84289 |
| H | -1.25452 | -4.35613 | -1.86881 |
| C | 1.30221  | 1.02329  | -0.31653 |
| C | -1.02049 | 1.69859  | -0.73164 |
| C | -0.68763 | 3.02625  | -0.34803 |
| C | 1.60111  | 2.36559  | 0.10039  |
| C | 0.63058  | 3.31371  | 0.13345  |
| C | -2.27663 | 1.47853  | -1.34940 |
| C | -1.64807 | 4.05556  | -0.47942 |
| C | 2.32761  | 0.05819  | -0.52711 |
| H | 0.85826  | 4.32544  | 0.47538  |
| C | -2.30452 | 0.28722  | 1.56029  |
| C | -3.96671 | -1.23882 | 0.66458  |
| C | -4.93474 | -0.62618 | 1.49588  |
| C | -3.25546 | 0.85152  | 2.38174  |
| C | -4.59320 | 0.41502  | 2.32897  |
| C | -4.29892 | -2.40697 | -0.09762 |
| H | -5.95646 | -1.01244 | 1.48436  |
| H | -1.27269 | 0.62588  | 1.64428  |
| H | -2.96576 | 1.63403  | 3.08557  |
| H | -5.34539 | 0.87593  | 2.97176  |
| C | -3.18377 | 2.50299  | -1.49894 |
| H | -4.14022 | 2.30984  | -1.98766 |
| C | -2.88241 | 3.79754  | -1.03253 |
| H | -5.32738 | -2.77388 | -0.07403 |
| H | -3.57195 | -4.03102 | -1.27411 |
| H | 2.74954  | -1.83666 | -1.48066 |
| C | 3.75299  | 0.23659  | -0.20266 |
| H | -1.38634 | 5.06559  | -0.15665 |
| H | -2.52522 | 0.49066  | -1.73392 |
| C | 4.26049  | -0.85928 | 0.52460  |
| C | 4.63116  | 1.26956  | -0.52944 |
| C | 3.26098  | -1.82872 | 0.83424  |
| C | 5.60839  | -0.98310 | 0.90698  |
| C | 5.96904  | 1.16285  | -0.15182 |
| H | 4.28762  | 2.12685  | -1.10926 |
| H | 6.66208  | 1.96059  | -0.42726 |
| C | 6.45751  | 0.05432  | 0.55872  |
| H | 5.96295  | -1.85098 | 1.46490  |
| H | 7.50994  | 0.01212  | 0.84284  |
| H | 2.61510  | 2.61792  | 0.41005  |
| O | 2.80913  | -2.69272 | 1.42781  |
| H | -3.61534 | 4.59954  | -1.13778 |

**Table S12. Optimized geometry (Cartesian coordinates, Å) of S2-conf-2 (to 2a)**

|   |             |             |             |
|---|-------------|-------------|-------------|
| C | -0.56144800 | -1.09306800 | -0.16038000 |
| C | 0.01807800  | 0.23187100  | -0.04812700 |
| C | 0.33049100  | -2.18075800 | -0.35505100 |
| C | -1.97852500 | -1.39129400 | -0.10632100 |
| C | -2.42231900 | -2.58647200 | -0.71385800 |
| C | -0.15711900 | -3.43447000 | -0.83138600 |
| C | -1.48268400 | -3.59153800 | -1.09581100 |
| C | -2.96248700 | -0.57973100 | 0.59565600  |
| C | -3.82330300 | -2.81520200 | -0.90955900 |
| C | 1.71433800  | -2.01097100 | -0.09890100 |
| H | 0.55235700  | -4.24362500 | -1.01669300 |
| H | -1.85692000 | -4.51937200 | -1.53343900 |
| C | 1.35963500  | 0.35188700  | 0.37466500  |
| C | -0.68160200 | 1.45927200  | -0.40708600 |
| C | -0.17248100 | 2.70786600  | 0.03892800  |
| C | 1.82888800  | 1.62321200  | 0.86669200  |
| C | 1.06699000  | 2.74304600  | 0.75389600  |
| C | -1.82070100 | 1.47300300  | -1.24738400 |
| C | -0.87236900 | 3.90178100  | -0.25557800 |
| C | 2.21751000  | -0.80367800 | 0.32033100  |
| H | 1.41111900  | 3.69124800  | 1.17303100  |
| C | -2.61896400 | 0.39032800  | 1.56915700  |
| C | -4.34315600 | -0.81679000 | 0.35995000  |
| C | -5.31403300 | 0.00260200  | 0.98510200  |
| C | -3.58091100 | 1.15611900  | 2.18982400  |
| C | -4.94251800 | 0.98707700  | 1.87210400  |
| C | -4.74406200 | -1.92913600 | -0.44948600 |
| H | -6.36982700 | -0.17942400 | 0.77156900  |
| H | -1.57678700 | 0.52296300  | 1.85628100  |
| H | -3.28457200 | 1.89039700  | 2.94132800  |
| H | -5.69918100 | 1.60790400  | 2.35536000  |
| C | -2.46798000 | 2.65052400  | -1.55158400 |
| H | -3.34036400 | 2.63094500  | -2.20721000 |
| C | -2.01200800 | 3.87524900  | -1.02727200 |
| H | -5.80909100 | -2.09108000 | -0.62980500 |
| H | -4.13398200 | -3.71496900 | -1.44466400 |
| H | 2.38176300  | -2.86325200 | -0.25071700 |
| C | 3.67268500  | -0.68049800 | 0.52587200  |
| H | -0.48096100 | 4.84926000  | 0.12192500  |
| H | -2.18654100 | 0.54175000  | -1.67689200 |
| C | 4.43898400  | 0.26303400  | -0.22202700 |
| C | 4.39132700  | -1.49900000 | 1.39817500  |
| C | 3.80134400  | 1.02111900  | -1.19851600 |
| C | 5.84394800  | 0.41453900  | -0.08024700 |
| C | 5.77104200  | -1.36259900 | 1.53871200  |
| H | 3.84721000  | -2.23478000 | 1.99261300  |
| H | 6.29879700  | -2.01098600 | 2.24165900  |
| C | 6.49918200  | -0.40603700 | 0.81356200  |
| H | 6.38668900  | 1.15482600  | -0.67066400 |
| H | 7.57715500  | -0.31315400 | 0.94972700  |
| H | 2.78535900  | 1.67405100  | 1.39216300  |
| O | 3.37602800  | 1.63060900  | -2.04535500 |
| H | -2.54420300 | 4.80033000  | -1.25598400 |

**Table S13. Optimized geometry (Cartesian coordinates, Å) of S3-conf-2a**

|   |             |             |             |
|---|-------------|-------------|-------------|
| C | -0.62182200 | -1.19859700 | -0.15537100 |
| C | -0.00349100 | 0.10907700  | -0.15955800 |
| C | 0.25149400  | -2.30101800 | -0.34752200 |
| C | -2.03463900 | -1.46036700 | -0.00498800 |
| C | -2.52725100 | -2.69224300 | -0.49096100 |
| C | -0.28104400 | -3.57770500 | -0.70345800 |
| C | -1.62337700 | -3.73575900 | -0.85749700 |
| C | -2.96946100 | -0.56520100 | 0.66351600  |
| C | -3.93970300 | -2.91049400 | -0.58961200 |
| C | 1.64747500  | -2.13124900 | -0.20382900 |
| H | 0.40638600  | -4.40631200 | -0.88410900 |
| H | -2.03462100 | -4.68734900 | -1.20022600 |
| C | 1.37006200  | 0.21590200  | 0.12751400  |
| C | -0.67532600 | 1.30367800  | -0.64703500 |
| C | -0.09913800 | 2.61522500  | -0.42734700 |
| C | 1.96156000  | 1.54811100  | 0.43385900  |
| C | 1.16540500  | 2.71894900  | 0.09004600  |
| C | -1.84898100 | 1.25843600  | -1.42658600 |
| C | -0.79452400 | 3.80400100  | -0.84676000 |
| C | 2.21694300  | -0.91961100 | 0.13896500  |
| H | 1.63700800  | 3.69566900  | 0.23514200  |
| C | -2.56558500 | 0.48815900  | 1.52178100  |
| C | -4.36379200 | -0.79304700 | 0.51455500  |
| C | -5.28984000 | 0.10394800  | 1.10091900  |
| C | -3.48377100 | 1.33119500  | 2.10885200  |
| C | -4.86155200 | 1.16172900  | 1.87029800  |
| C | -4.82190700 | -1.96885000 | -0.16535700 |
| H | -6.35746100 | -0.07621300 | 0.95597100  |
| H | -1.50960600 | 0.61632800  | 1.75853300  |
| H | -3.14213600 | 2.12193300  | 2.77980200  |
| H | -5.58453900 | 1.83967400  | 2.32742400  |
| C | -2.46776700 | 2.41693500  | -1.84987300 |
| H | -3.37400400 | 2.33464600  | -2.45426500 |
| C | -1.96869000 | 3.70689600  | -1.53215400 |
| H | -5.89701200 | -2.12649300 | -0.27550400 |
| H | -4.29242900 | -3.84730300 | -1.02560200 |
| H | 2.27924900  | -3.00635200 | -0.36496200 |
| C | 3.67570200  | -0.76418600 | 0.35357900  |
| H | -0.34132000 | 4.77393900  | -0.63188000 |
| H | -2.27649000 | 0.29886300  | -1.70820900 |
| C | 4.28231000  | 0.50753400  | 0.26823200  |
| C | 4.50510700  | -1.86877700 | 0.58539400  |
| C | 3.47291800  | 1.73254100  | 0.13075200  |
| C | 5.67314300  | 0.65045900  | 0.35512700  |
| C | 5.88417400  | -1.71854900 | 0.69245700  |
| H | 4.07557400  | -2.86523800 | 0.69553200  |
| H | 6.50538400  | -2.59680800 | 0.87859900  |
| C | 6.47678300  | -0.46051300 | 0.56570800  |
| H | 6.09894700  | 1.65186100  | 0.27043900  |
| H | 7.55928500  | -0.35002800 | 0.64560800  |
| H | 1.99300800  | 1.59402800  | 1.55381800  |
| O | 3.91189600  | 2.83227200  | -0.08205800 |
| H | -2.50117300 | 4.59775100  | -1.86677300 |

**Table S14. Optimized geometry (Cartesian coordinates, Å) of the transition state between S2-conf-2 to S3-conf-2a**

|   |          |          |          |
|---|----------|----------|----------|
| C | -0.57839 | -1.18340 | -0.04984 |
| C | 0.03383  | 0.12939  | 0.04685  |
| C | 0.29731  | -2.29282 | -0.18310 |
| C | -2.00239 | -1.43792 | -0.04752 |
| C | -2.45559 | -2.64886 | -0.61723 |
| C | -0.20773 | -3.55236 | -0.61734 |
| C | -1.53013 | -3.69184 | -0.91424 |
| C | -2.99268 | -0.56286 | 0.56496  |
| C | -3.85369 | -2.84648 | -0.86641 |
| C | 1.69210  | -2.13688 | 0.05457  |
| H | 0.48637  | -4.38467 | -0.75005 |
| H | -1.91122 | -4.63009 | -1.32276 |
| C | 1.36124  | 0.21588  | 0.49780  |
| C | -0.58519 | 1.37001  | -0.40081 |
| C | -0.03900 | 2.62476  | 0.01052  |
| C | 1.88081  | 1.49335  | 0.95514  |
| C | 1.14142  | 2.64356  | 0.79186  |
| C | -1.67992 | 1.39525  | -1.29501 |
| C | -0.67319 | 3.83687  | -0.37227 |
| C | 2.21512  | -0.93611 | 0.45217  |
| H | 1.48656  | 3.58557  | 1.22436  |
| C | -2.66645 | 0.44116  | 1.50953  |
| C | -4.36709 | -0.76789 | 0.27025  |
| C | -5.33902 | 0.11309  | 0.80299  |
| C | -3.63127 | 1.26798  | 2.04206  |
| C | -4.97946 | 1.12856  | 1.65997  |
| C | -4.76551 | -1.90985 | -0.49962 |
| H | -6.38852 | -0.04596 | 0.54467  |
| H | -1.63770 | 0.54765  | 1.85154  |
| H | -3.34949 | 2.02482  | 2.77668  |
| H | -5.73817 | 1.79571  | 2.07325  |
| C | -2.25172 | 2.58661  | -1.68579 |
| H | -3.09174 | 2.57281  | -2.38276 |
| C | -1.76947 | 3.81996  | -1.19903 |
| H | -5.82553 | -2.04893 | -0.72322 |
| H | -4.16772 | -3.76365 | -1.36893 |
| H | 2.34731  | -2.99421 | -0.11697 |
| C | 3.67555  | -0.73073 | 0.52845  |
| H | -0.25773 | 4.78269  | -0.01768 |
| H | -2.07193 | 0.46144  | -1.69416 |
| C | 4.23813  | 0.41037  | -0.09685 |
| C | 4.56462  | -1.65303 | 1.07658  |
| C | 3.39619  | 1.40228  | -0.69531 |
| C | 5.62695  | 0.62158  | -0.18738 |
| C | 5.94304  | -1.44359 | 1.00799  |
| H | 4.17070  | -2.54238 | 1.57142  |
| H | 6.61611  | -2.17723 | 1.45638  |
| C | 6.47790  | -0.31636 | 0.37849  |
| H | 6.02164  | 1.50818  | -0.68702 |
| H | 7.55760  | -0.16942 | 0.33015  |
| H | 2.71411  | 1.49930  | 1.66131  |
| O | 3.19310  | 2.16839  | -1.51638 |
| H | -2.24938 | 4.75222  | -1.50096 |

**Table S15. Optimized geometry (Cartesian coordinates, Å) of S2-conf-2 (to 2f)**

|   |             |             |             |
|---|-------------|-------------|-------------|
| C | -0.57728400 | -0.93563000 | -0.35950000 |
| C | -0.01507400 | 0.38851300  | -0.14025500 |
| C | 0.32074800  | -1.96087600 | -0.75287800 |
| C | -1.97399600 | -1.28555800 | -0.23096300 |
| C | -2.43492400 | -2.42050800 | -0.93753100 |
| C | -0.16731700 | -3.16834300 | -1.33230500 |
| C | -1.50619700 | -3.34029900 | -1.50955700 |
| C | -2.92047800 | -0.58662200 | 0.62826200  |
| C | -3.84076300 | -2.67585800 | -1.04706500 |
| C | 1.70853000  | -1.79314900 | -0.51250500 |
| H | 0.54479600  | -3.92903500 | -1.65963900 |
| H | -1.89171800 | -4.22430800 | -2.02157100 |
| C | 1.34375500  | 0.50139100  | 0.22935400  |
| C | -0.76187800 | 1.61612000  | -0.36728400 |
| C | -0.23173100 | 2.84795300  | 0.10172900  |
| C | 1.86674100  | 1.76848700  | 0.65052600  |
| C | 1.08662900  | 2.88139500  | 0.65273300  |
| C | -1.97474600 | 1.65871800  | -1.09992200 |
| C | -0.97774700 | 4.04209600  | -0.04987900 |
| C | 2.20176600  | -0.64428600 | 0.07082600  |
| H | 1.48642000  | 3.83460600  | 1.00548600  |
| C | -2.52648700 | 0.29513500  | 1.66382000  |
| C | -4.30826800 | -0.84947900 | 0.47837200  |
| C | -5.24802600 | -0.13838400 | 1.26245800  |
| C | -3.45660300 | 0.95596800  | 2.43599100  |
| C | -4.83381000 | 0.76453000  | 2.21521200  |
| C | -4.74332800 | -1.88182400 | -0.41569700 |
| H | -6.31191500 | -0.33823700 | 1.11559800  |
| H | -1.46877600 | 0.44384600  | 1.87550000  |
| H | -3.12091100 | 1.62506600  | 3.23055800  |
| H | -5.56590600 | 1.30296700  | 2.81983800  |
| C | -2.66868400 | 2.83593600  | -1.26441000 |
| H | -3.59746800 | 2.83748000  | -1.83768300 |
| C | -2.18639800 | 4.03656800  | -0.70629400 |
| H | -5.81479300 | -2.06210400 | -0.52764000 |
| H | -4.17055700 | -3.51991500 | -1.65628100 |
| H | 2.35841300  | -2.65926700 | -0.67332900 |
| C | 3.61941100  | -0.62546100 | 0.46006000  |
| H | -0.56366600 | 4.97419100  | 0.34130200  |
| H | -2.36253400 | 0.75091700  | -1.55843900 |
| C | 4.61161600  | -0.94675600 | -0.50886700 |
| C | 4.07781200  | -0.36119000 | 1.75498300  |
| C | 4.19953000  | -1.04202900 | -1.83175300 |
| C | 5.99578300  | -1.07155200 | -0.20116200 |
| C | 5.42855800  | -0.47230600 | 2.06269800  |
| H | 3.35303000  | -0.10728500 | 2.53018000  |
| H | 5.75499500  | -0.28920200 | 3.08879700  |
| C | 6.38720300  | -0.83463400 | 1.09638300  |
| H | 6.71892900  | -1.33304800 | -0.97531200 |
| H | 7.43876600  | -0.92035200 | 1.37250100  |
| H | 2.90756900  | 1.84620300  | 0.96771800  |
| O | 3.96801600  | -1.07103400 | -2.93665100 |
| H | -2.75349400 | 4.96162300  | -0.82493800 |

**Table S16. Optimized geometry (Cartesian coordinates, Å) of S3-conf-2f**

|   |             |             |             |
|---|-------------|-------------|-------------|
| C | -0.46067400 | -0.85252300 | -0.25575000 |
| C | 0.04529300  | 0.46152100  | 0.11127900  |
| C | 0.49187200  | -1.80022000 | -0.68076300 |
| C | -1.85854300 | -1.20045900 | -0.33060500 |
| C | -2.22417000 | -2.25194400 | -1.20366300 |
| C | 0.10548000  | -2.91265200 | -1.44599800 |
| C | -1.22100900 | -3.07193200 | -1.77538800 |
| C | -2.89654100 | -0.58491800 | 0.48016400  |
| C | -3.61038000 | -2.49811200 | -1.48961300 |
| C | 1.88994200  | -1.65592500 | -0.20514100 |
| H | 0.86395700  | -3.60400700 | -1.81315200 |
| H | -1.52297900 | -3.88339200 | -2.44134400 |
| C | 1.36077300  | 0.61795000  | 0.68911400  |
| C | -0.69207800 | 1.66642500  | -0.17948300 |
| C | -0.31523300 | 2.88427900  | 0.45861200  |
| C | 1.72875100  | 1.88278000  | 1.28664500  |
| C | 0.89163500  | 2.94082400  | 1.24136800  |
| C | -1.76856700 | 1.69839500  | -1.10414000 |
| C | -1.09513100 | 4.03913400  | 0.26539200  |
| C | 2.27694200  | -0.40267600 | 0.48412400  |
| H | 1.15915000  | 3.88198600  | 1.72520100  |
| C | -2.62258500 | 0.19827400  | 1.62751100  |
| C | -4.25581800 | -0.82737000 | 0.14816000  |
| C | -5.27926600 | -0.18243100 | 0.88192600  |
| C | -3.63504700 | 0.79979300  | 2.34202700  |
| C | -4.97729700 | 0.63390400  | 1.94911300  |
| C | -4.58189100 | -1.77125600 | -0.88370700 |
| H | -6.31962800 | -0.36287800 | 0.60242700  |
| H | -1.59665900 | 0.30864100  | 1.97968300  |
| H | -3.39655000 | 1.39043500  | 3.22846200  |
| H | -5.77570800 | 1.11916800  | 2.51340800  |
| C | -2.49579700 | 2.84954600  | -1.30547200 |
| H | -3.31299300 | 2.85559400  | -2.02810400 |
| C | -2.18038700 | 4.01880800  | -0.58975700 |
| H | -5.63329600 | -1.93941800 | -1.12623800 |
| H | -3.86260000 | -3.27701900 | -2.21191800 |
| H | 1.99943200  | -2.44727900 | 0.57083200  |
| C | 3.74254700  | -0.38463100 | 0.56775100  |
| H | -0.81593300 | 4.96040500  | 0.78039800  |
| H | -2.01085600 | 0.80928100  | -1.68330700 |
| C | 4.24585500  | -1.23988700 | -0.43524000 |
| C | 4.63928500  | 0.30284700  | 1.39293500  |
| C | 3.12781800  | -1.95146000 | -1.10454800 |
| C | 5.60623000  | -1.39322700 | -0.66617300 |
| C | 6.00596100  | 0.14032700  | 1.17192300  |
| H | 4.30307400  | 0.92349600  | 2.22269700  |
| H | 6.71510400  | 0.66364800  | 1.81595200  |
| C | 6.48850900  | -0.68207500 | 0.14644300  |
| H | 5.95947900  | -2.05456700 | -1.45939500 |
| H | 7.56521400  | -0.77334700 | -0.00795100 |
| H | 2.69221800  | 1.97643600  | 1.77969800  |
| O | 3.14925100  | -2.65007200 | -2.07327500 |
| H | -2.77379800 | 4.92319600  | -0.73775500 |

**Table S17. Optimized geometry (Cartesian coordinates, Å) of the transition state between S2-conf-2 to S3-conf-2f**

|   |          |          |          |
|---|----------|----------|----------|
| C | -0.50621 | -0.94019 | -0.24118 |
| C | 0.03793  | 0.38295  | 0.04650  |
| C | 0.41902  | -1.96003 | -0.56571 |
| C | -1.90873 | -1.28174 | -0.24838 |
| C | -2.30552 | -2.40719 | -1.00889 |
| C | -0.01090 | -3.15919 | -1.19229 |
| C | -1.33121 | -3.32315 | -1.49745 |
| C | -2.92859 | -0.58501 | 0.52359  |
| C | -3.69698 | -2.65133 | -1.25639 |
| C | 1.78784  | -1.79210 | -0.19006 |
| H | 0.72529  | -3.92094 | -1.45774 |
| H | -1.66791 | -4.20015 | -2.05407 |
| C | 1.35878  | 0.50165  | 0.54830  |
| C | -0.67885 | 1.60890  | -0.25118 |
| C | -0.20090 | 2.83841  | 0.28103  |
| C | 1.83827  | 1.76675  | 1.02713  |
| C | 1.05569  | 2.87392  | 0.96476  |
| C | -1.81236 | 1.65297  | -1.10277 |
| C | -0.93313 | 4.02963  | 0.06588  |
| C | 2.22646  | -0.62633 | 0.44236  |
| H | 1.41073  | 3.82549  | 1.36569  |
| C | -2.62924 | 0.28104  | 1.60277  |
| C | -4.29650 | -0.83482 | 0.23555  |
| C | -5.30210 | -0.12330 | 0.93202  |
| C | -3.62468 | 0.94310  | 2.28761  |
| C | -4.97495 | 0.76638  | 1.93047  |
| C | -4.65000 | -1.85584 | -0.70772 |
| H | -6.34834 | -0.31223 | 0.68115  |
| H | -1.59627 | 0.41497  | 1.92130  |
| H | -3.36342 | 1.59883  | 3.12029  |
| H | -5.75833 | 1.30438  | 2.46734  |
| C | -2.48977 | 2.82933  | -1.32680 |
| H | -3.35505 | 2.83514  | -1.99175 |
| C | -2.06950 | 4.02482  | -0.71040 |
| H | -5.70683 | -2.02664 | -0.92423 |
| H | -3.97191 | -3.48755 | -1.90240 |
| H | 2.39321  | -2.70275 | -0.13001 |
| C | 3.68746  | -0.56453 | 0.63209  |
| H | -0.56609 | 4.95995  | 0.50477  |
| H | -2.14745 | 0.74786  | -1.60573 |
| C | 4.36308  | -0.96714 | -0.53596 |
| C | 4.44485  | -0.19820 | 1.74220  |
| C | 3.45623  | -1.26038 | -1.60276 |
| C | 5.76181  | -1.05907 | -0.63063 |
| C | 5.83493  | -0.28092 | 1.66184  |
| H | 3.95977  | 0.11121  | 2.66897  |
| H | 6.43307  | -0.01663 | 2.53642  |
| C | 6.48994  | -0.70456 | 0.49431  |
| H | 6.25014  | -1.38030 | -1.55175 |
| H | 7.57978  | -0.74668 | 0.46926  |
| H | 2.84144  | 1.83779  | 1.44676  |
| O | 3.18173  | -1.38420 | -2.70564 |
| H | -2.62501 | 4.94953  | -0.87716 |
